# Supplementary material for: Catalytic enantioselective synthesis of cyclopropanes featuring vicinal all-carbon quaternary stereocenters with a CH2F group; study of the influence of C–F⋯H–N interactions on reactivity
Source: Royal Society of Chemistry journal article supplement (doi:10.1039/c8qo00842f), 2018-01-01

## Catalytic enantioselective synthesis of cyclopropanes featuring vicinal all-carbon quaternary stereocenters with a CH<sub>2</sub>F group; study of influence of C-F···H-N interactions on reactivity

Zhong-Yan Cao,<sup>‡a</sup> Wenmin Wang,<sup>‡b</sup> Kui Liao,<sup>a</sup> Xiaoming Wang,<sup>d</sup> Jian Zhou<sup>\*a,c,d</sup> and Jing Ma<sup>\*b</sup>

<sup>a</sup>Shanghai Key Laboratory of Green Chemistry and Chemical Process, East China Normal University, 3663N Zhongshan Road, Shanghai 200062, P. R. China. E-mail: [jzhou@chem.ecnu.edu.cn](mailto:jzhou@chem.ecnu.edu.cn).

<sup>b</sup>Institute of Theoretical and Computational Chemistry, School of Chemistry and Chemical Engineering, Nanjing University, Nanjing 210023, P R China. E-mail: [majing@nju.edu.cn](mailto:majing@nju.edu.cn).

<sup>c</sup>Shanghai Engineering Research Center of Molecular Therapeutics and New Drug Development, East China Normal University, 3663N Zhongshan Road, Shanghai 200062, P. R. China.

<sup>d</sup>State Key Laboratory of Organometallic Chemistry, Shanghai Institute of Organic Chemistry, Chinese Academy of Sciences, Shanghai 200032, P R China.

<sup>‡</sup>*These authors contributed equally to this article.*

### Supporting Information (Part B)

<sup>1</sup>H, <sup>13</sup>C and <sup>19</sup>F NMR Spectra of **3a-3q**, **4**, **7a-7e**

2-70

<sup>1</sup>H, <sup>13</sup>C, <sup>19</sup>F NMR spectra were obtained using a Bruker DPX-400 or 500 spectrometer. Chemical shifts of <sup>1</sup>H NMR and <sup>13</sup>C NMR spectra are reported in ppm from tetramethylsilane with the solvent resonance as the internal standard while PhCF<sub>3</sub> (δ -63.2 ppm) was used as external standard for <sup>19</sup>F NMR spectra. The following abbreviations were used to designate chemical shift multiplicities: s = singlet, d = doublet, t = triplet, q = quartet, m = multiplet, br = broad.

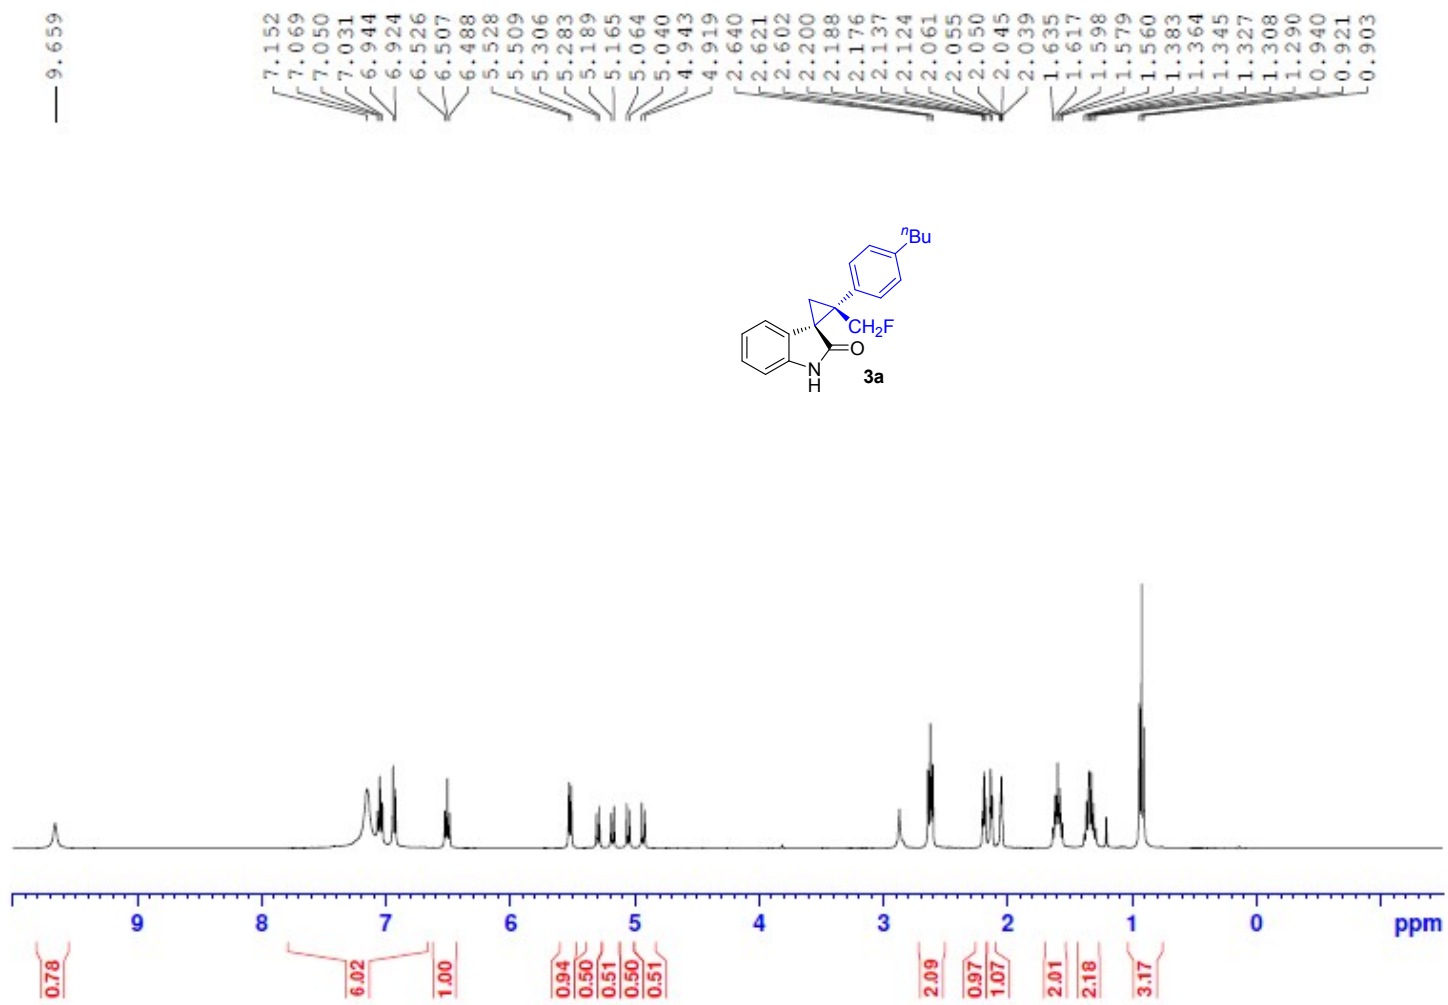

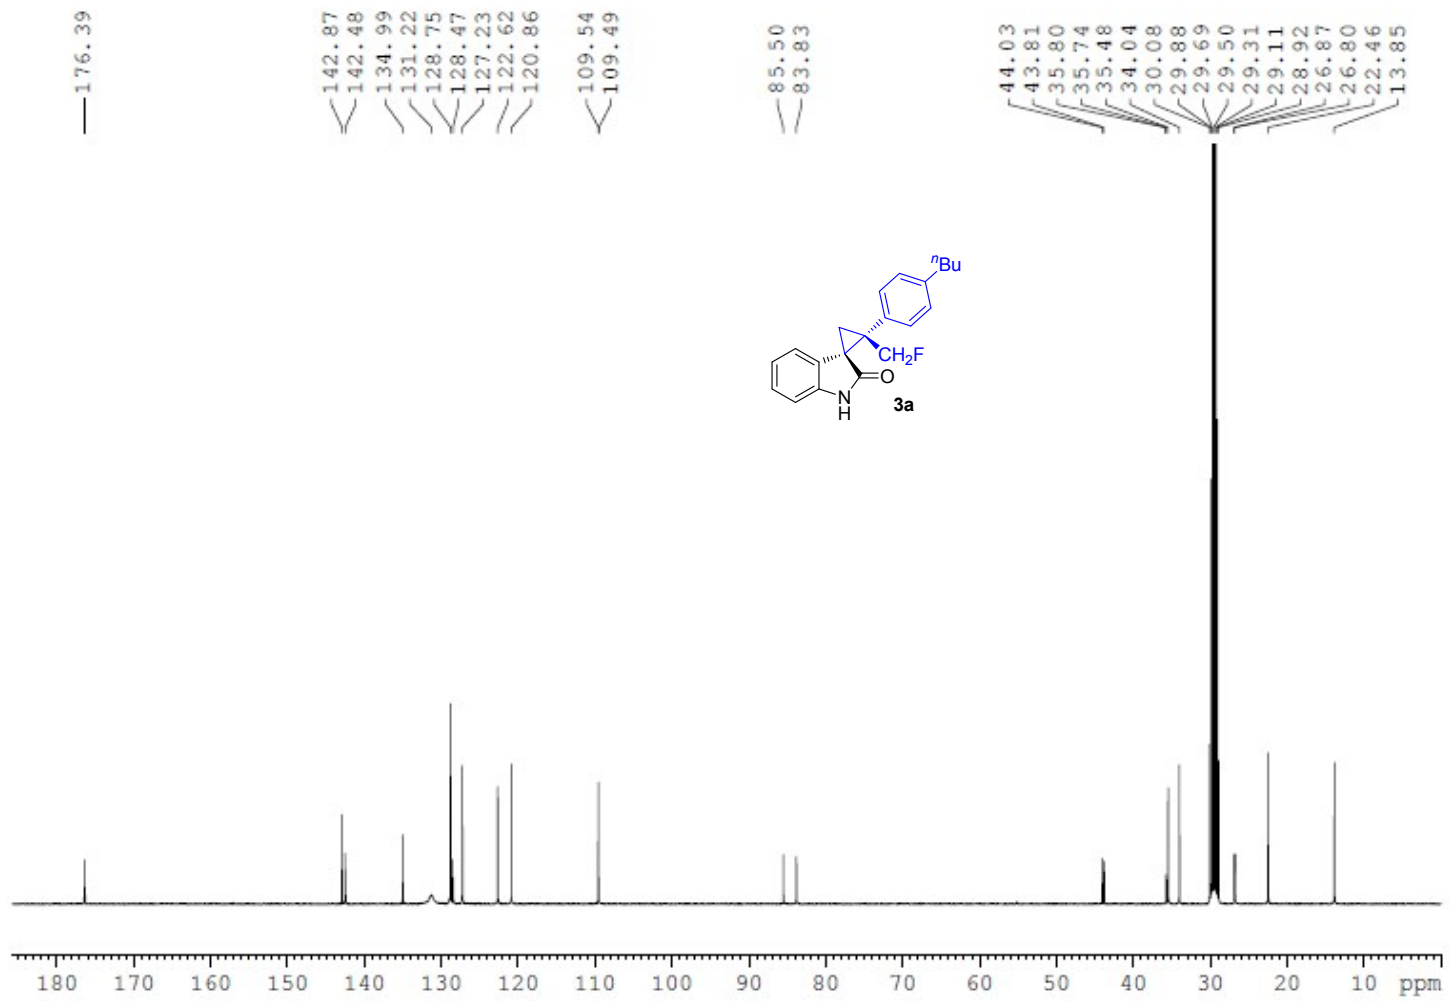

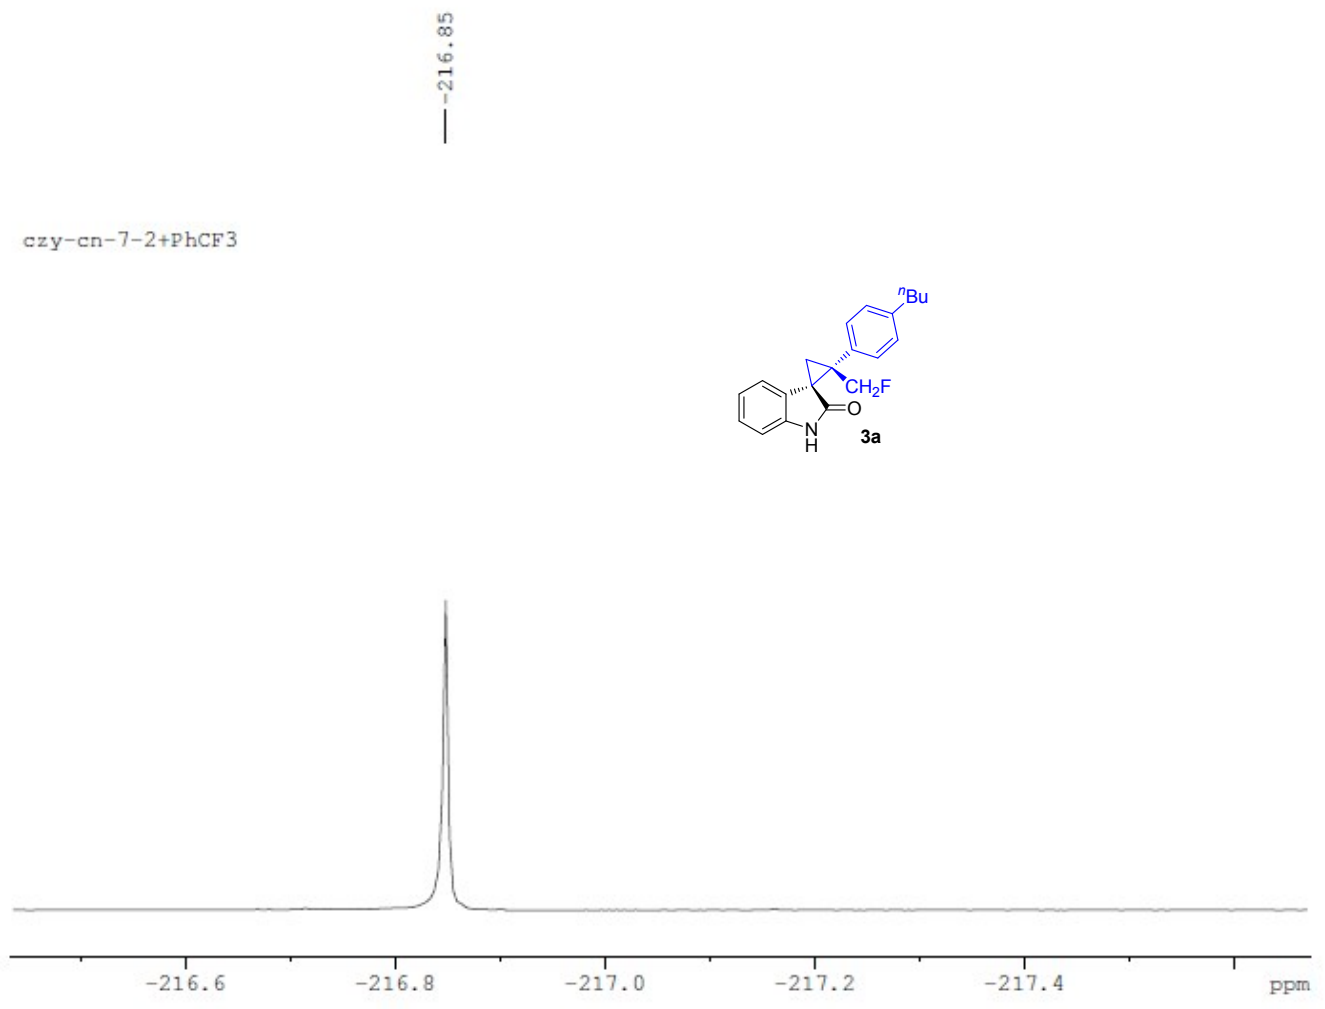

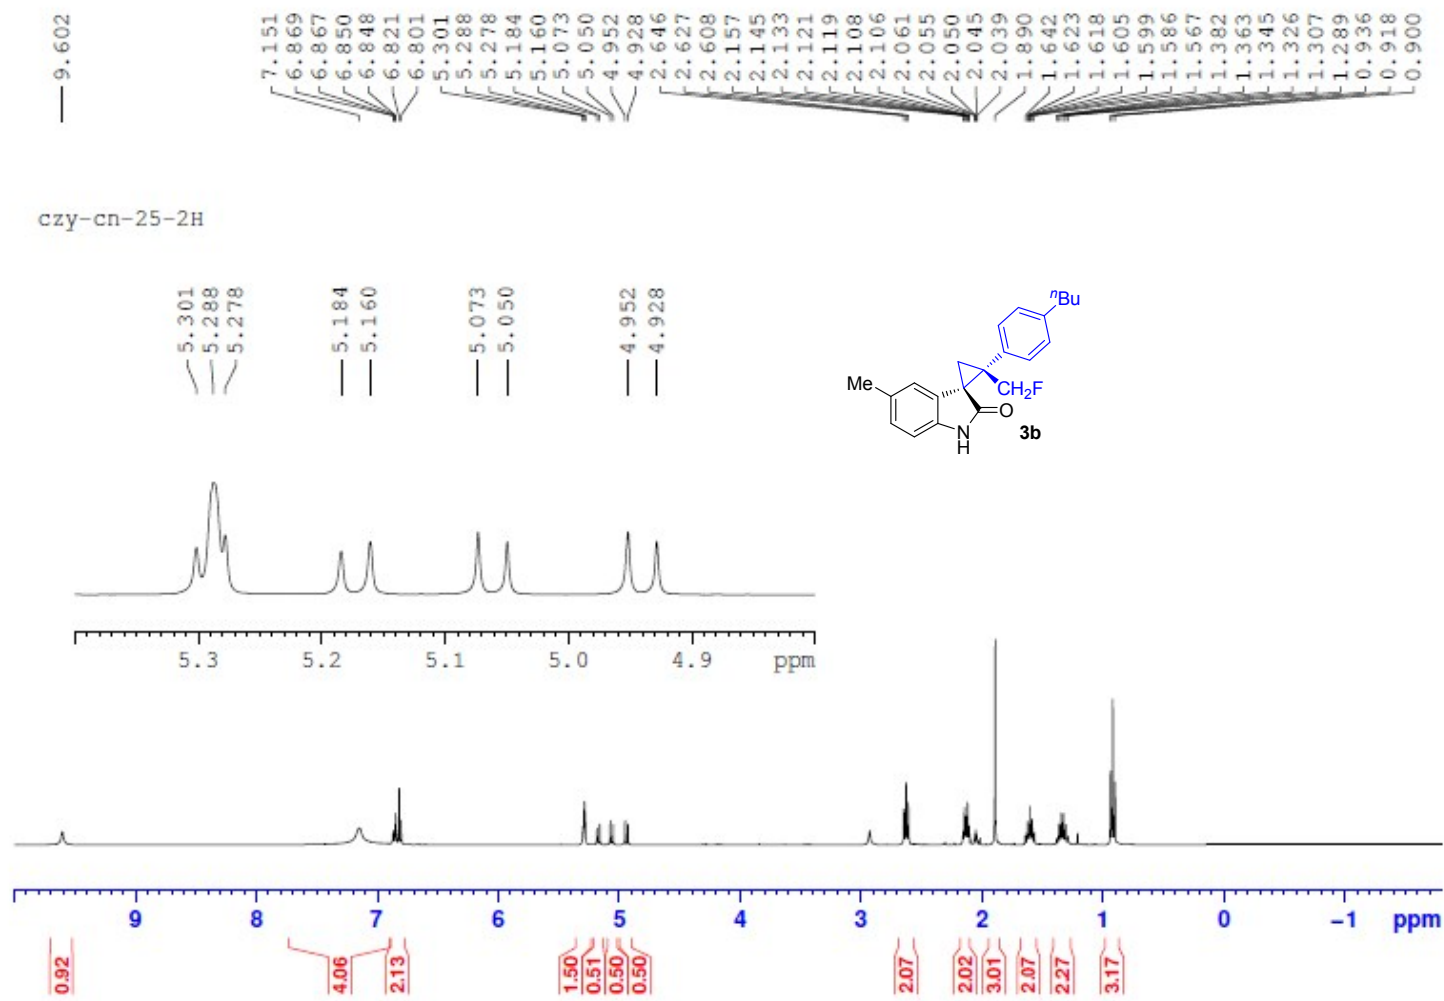

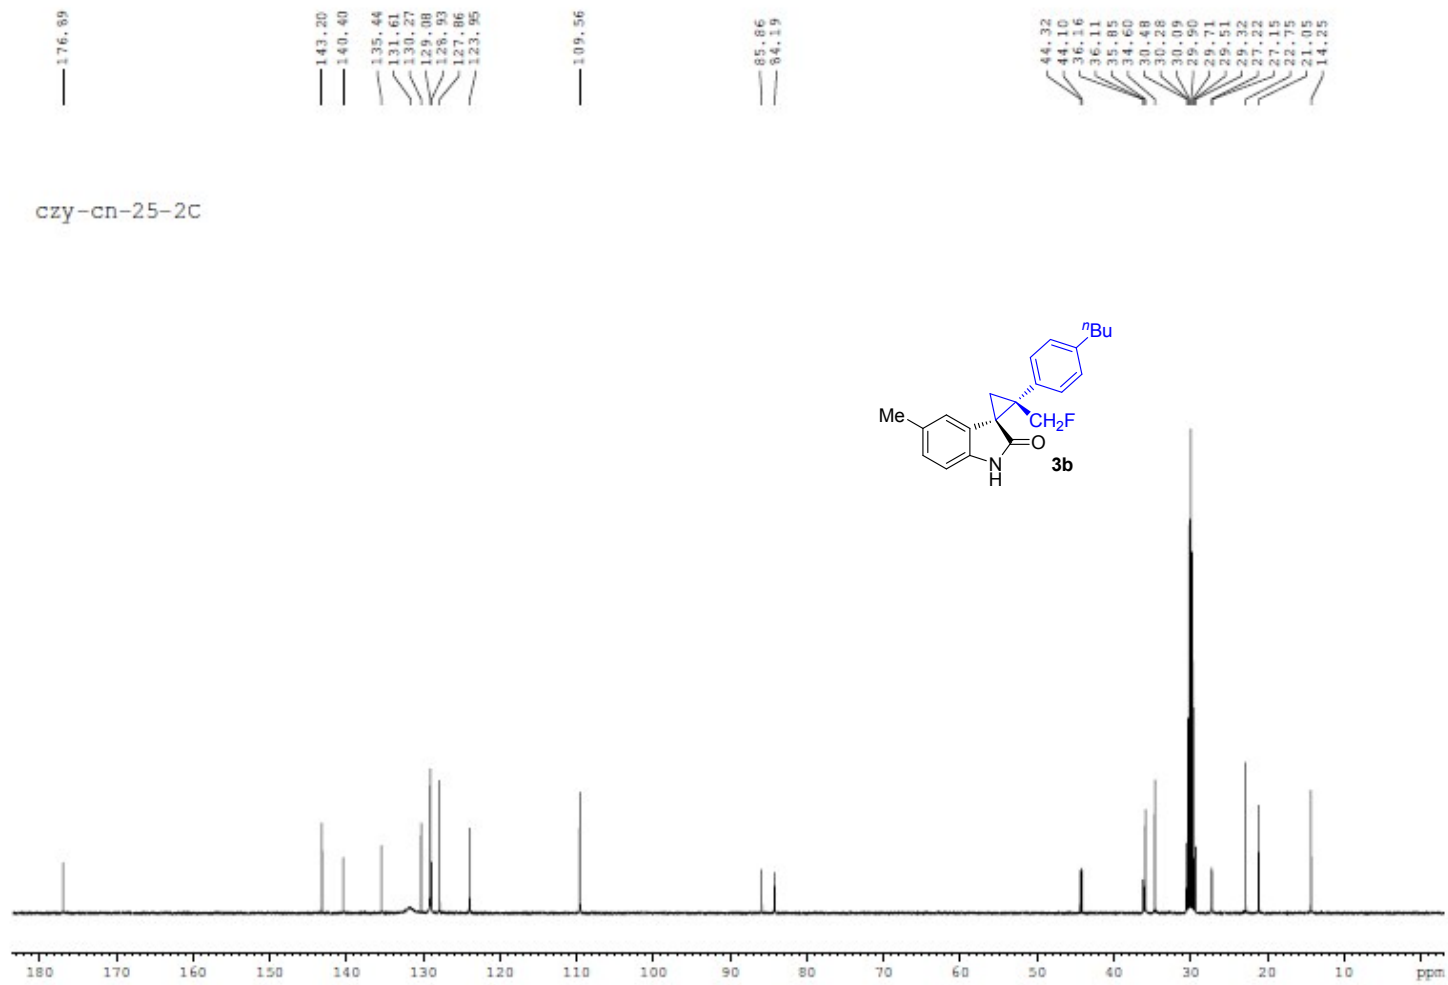

czy-cn-25-2f+pHcF3

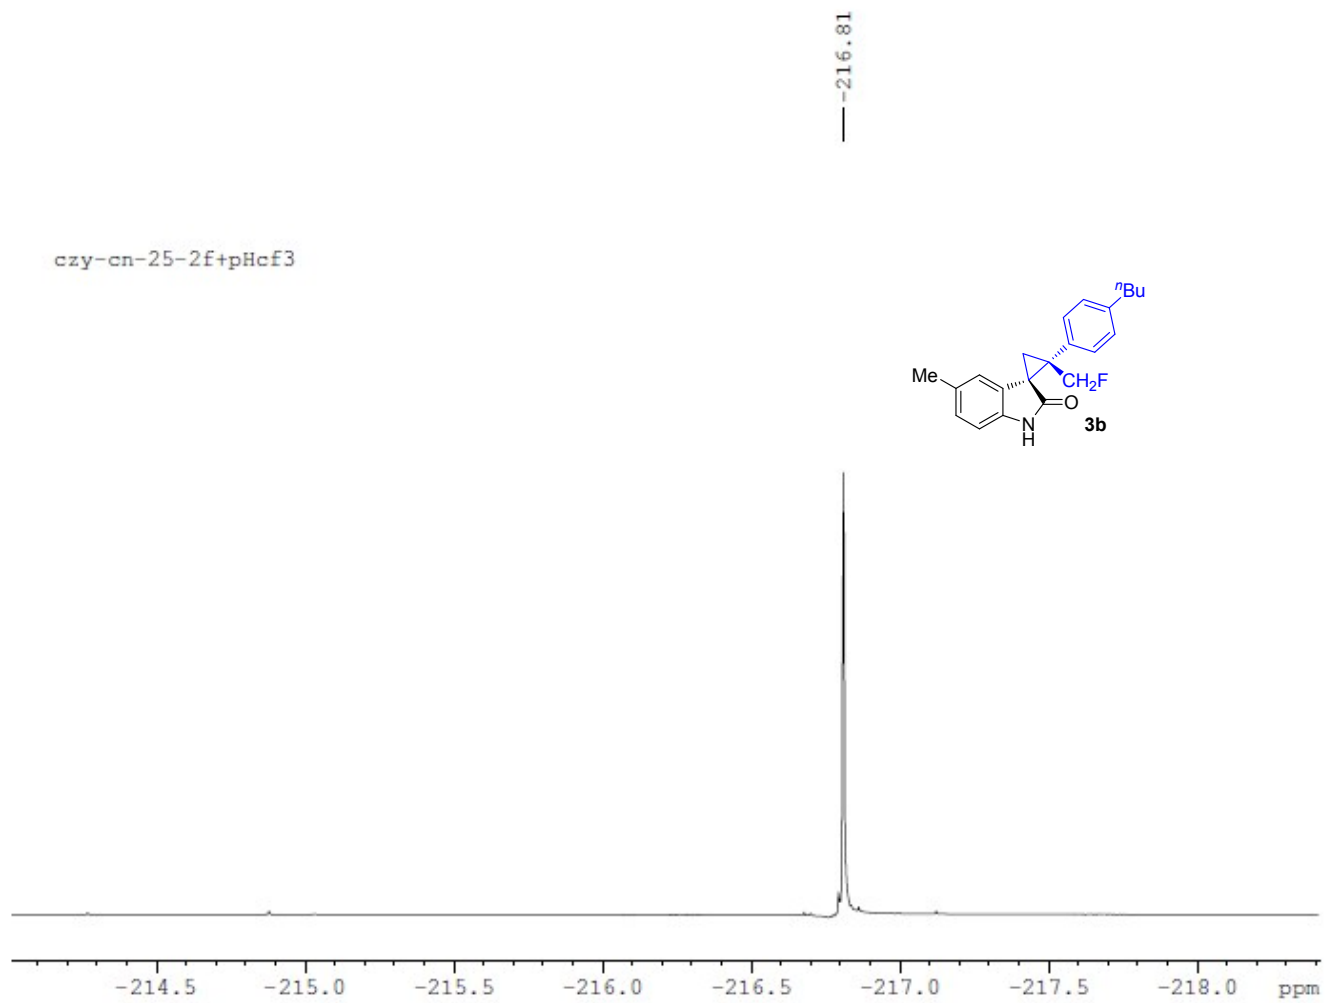

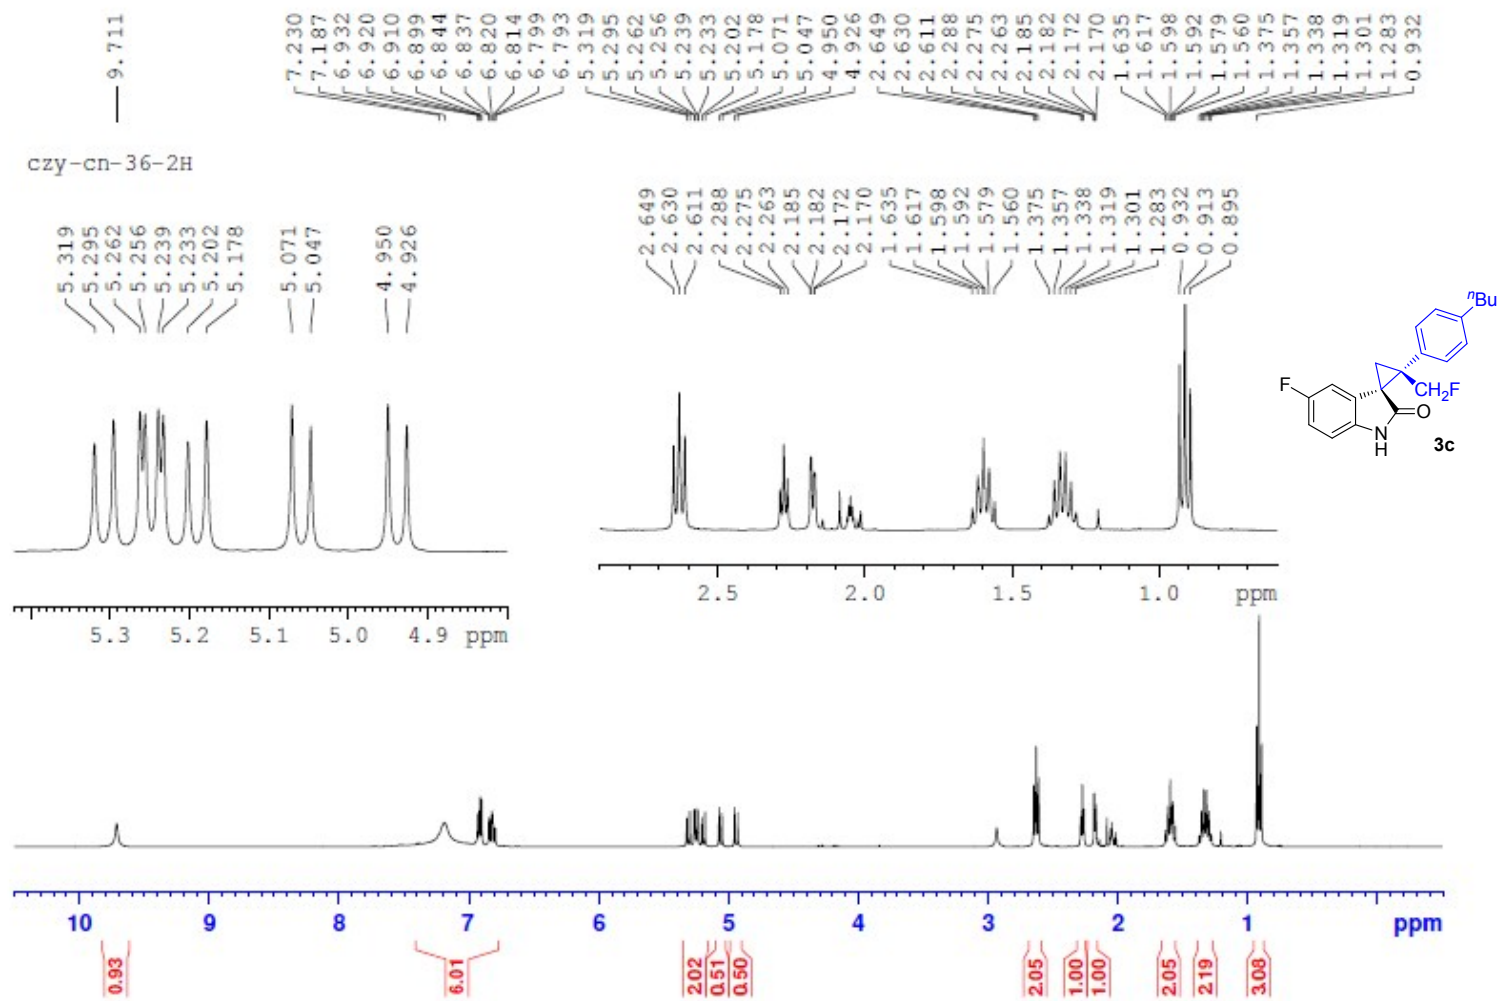



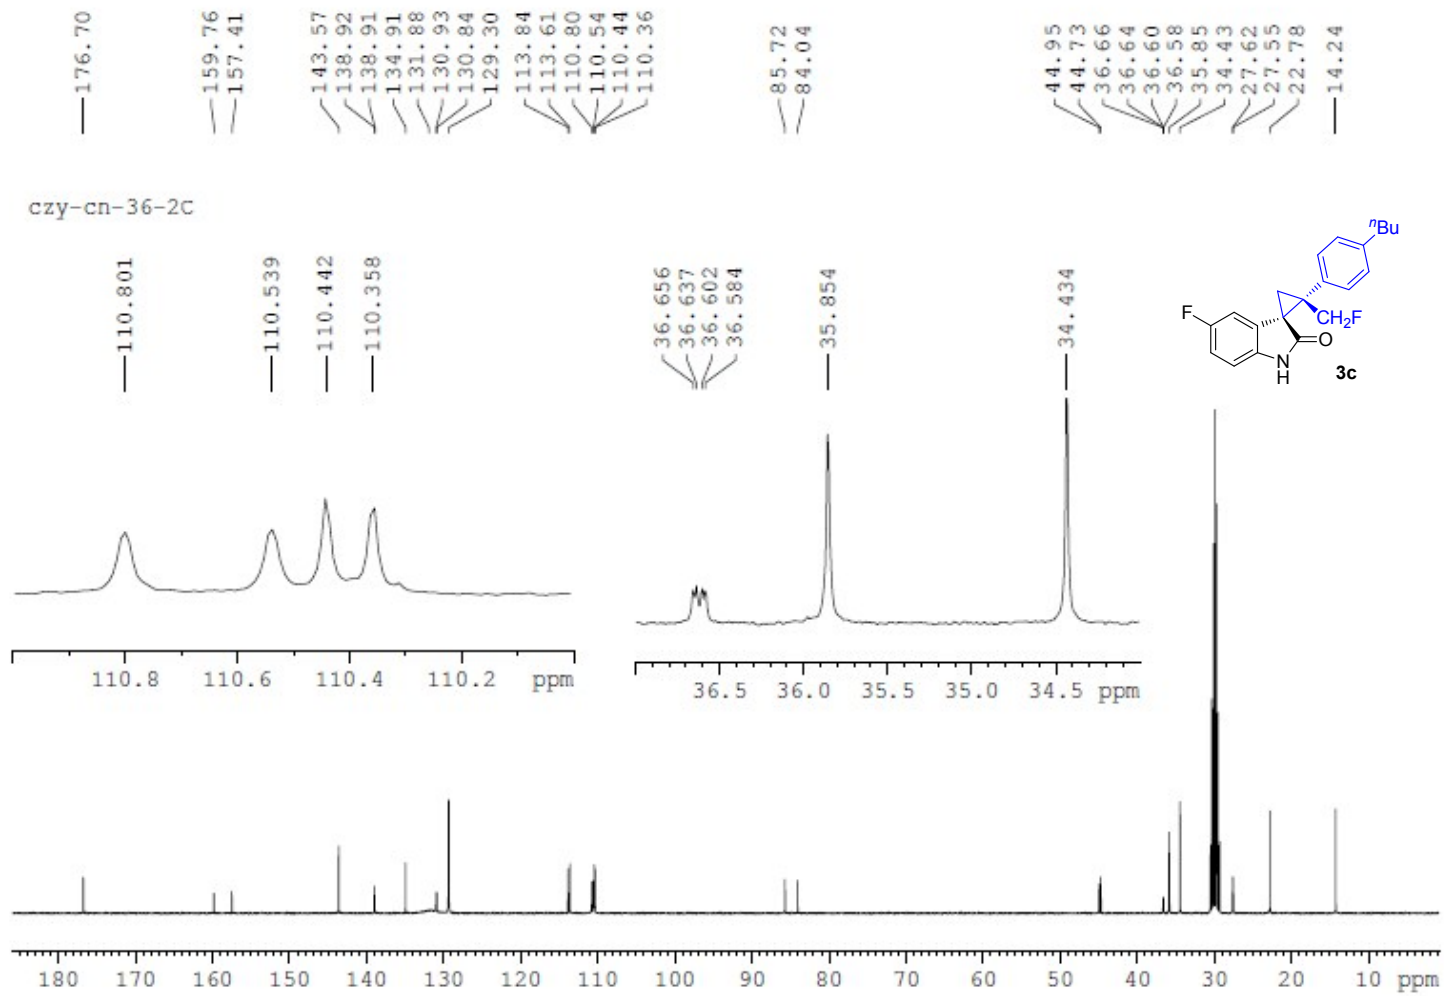

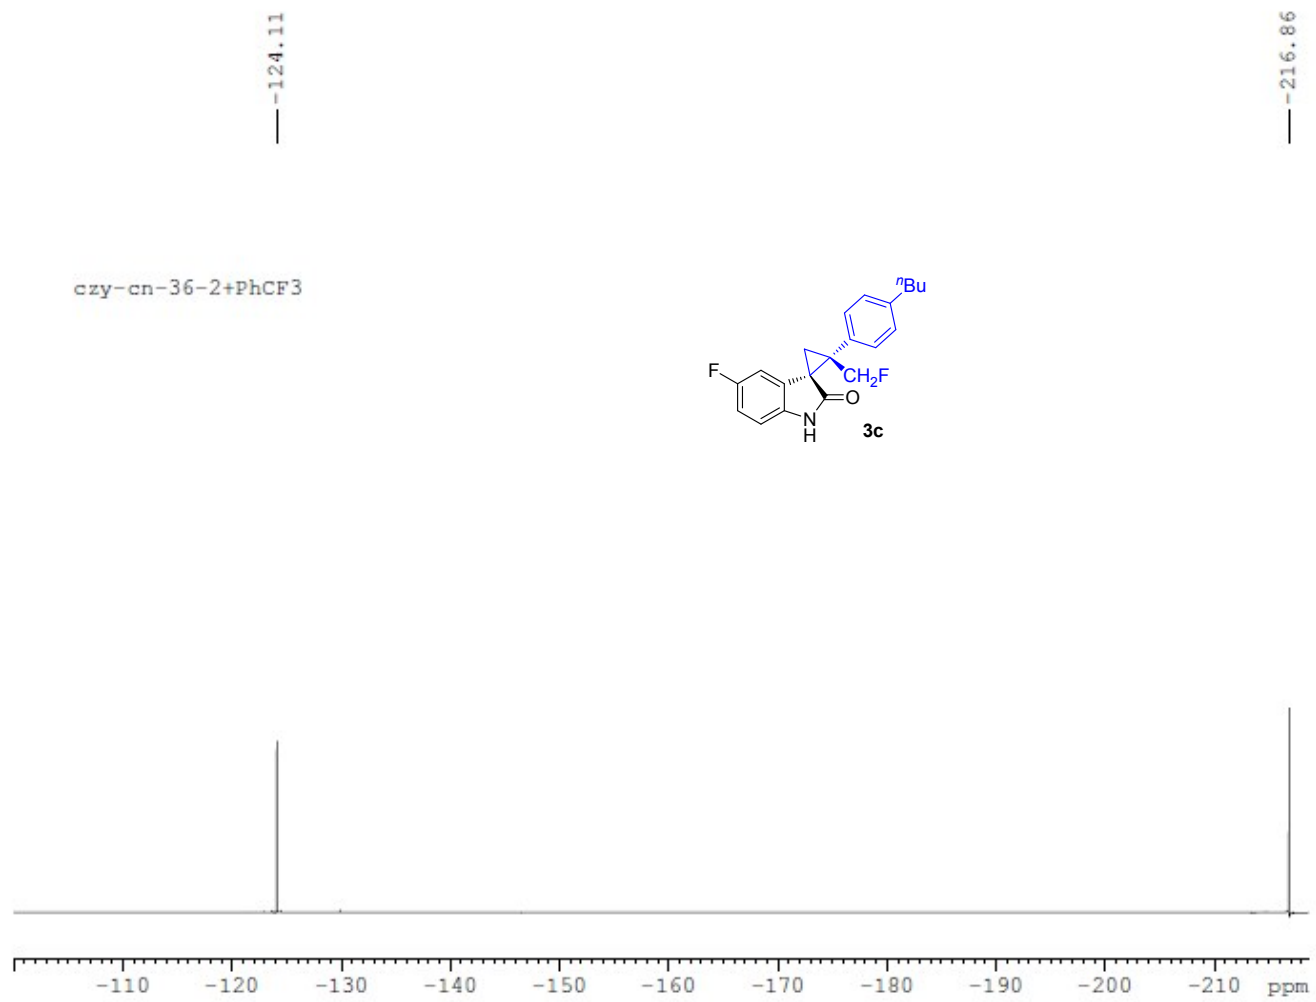

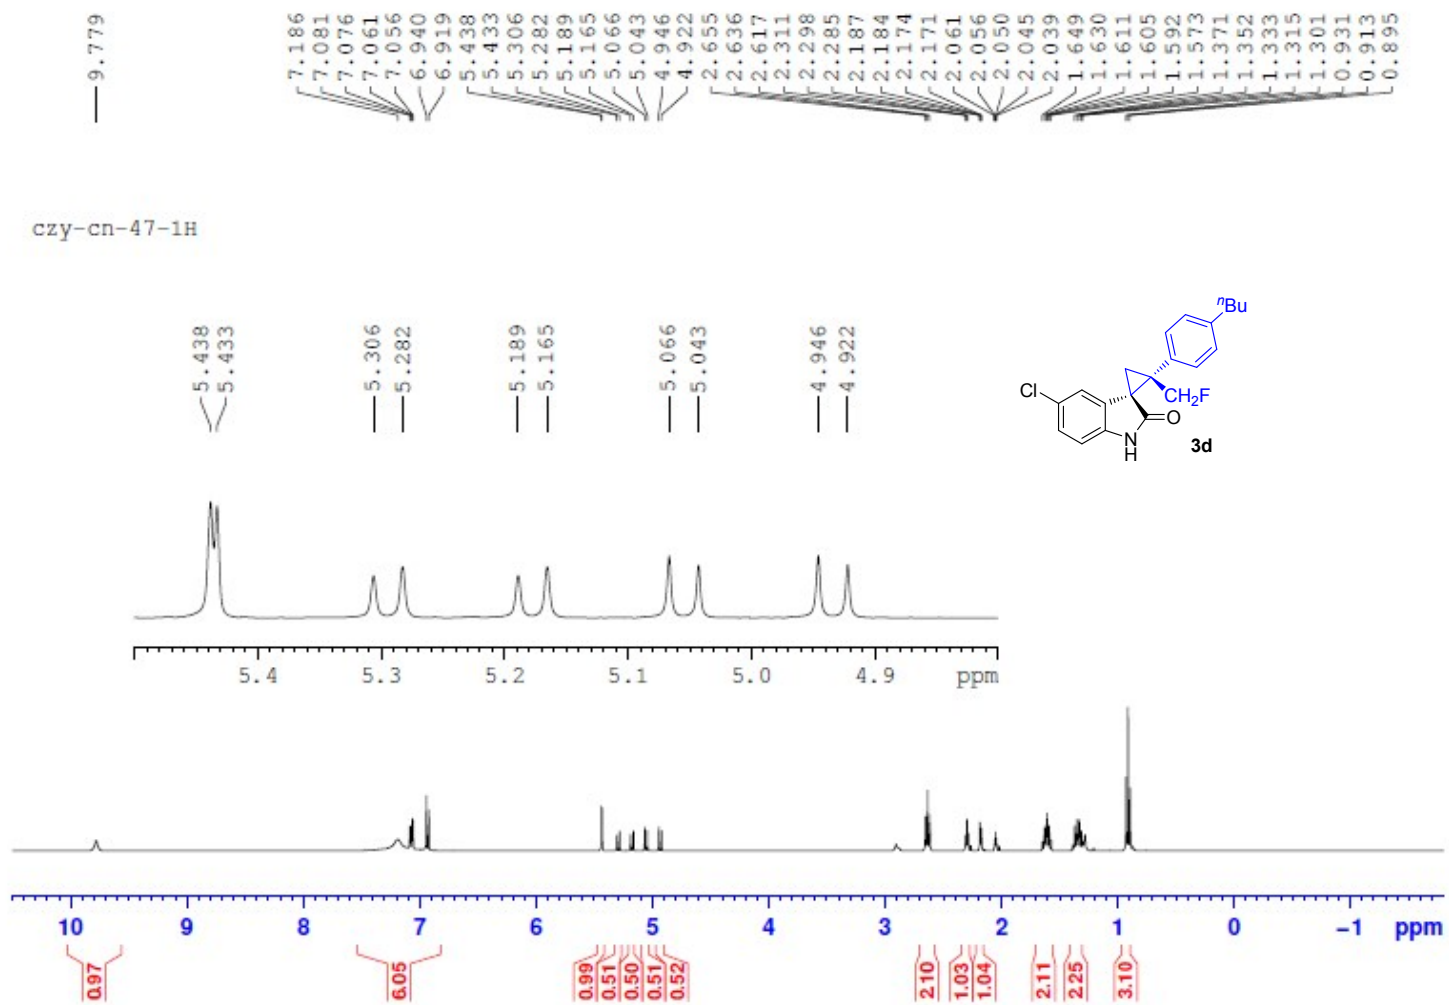

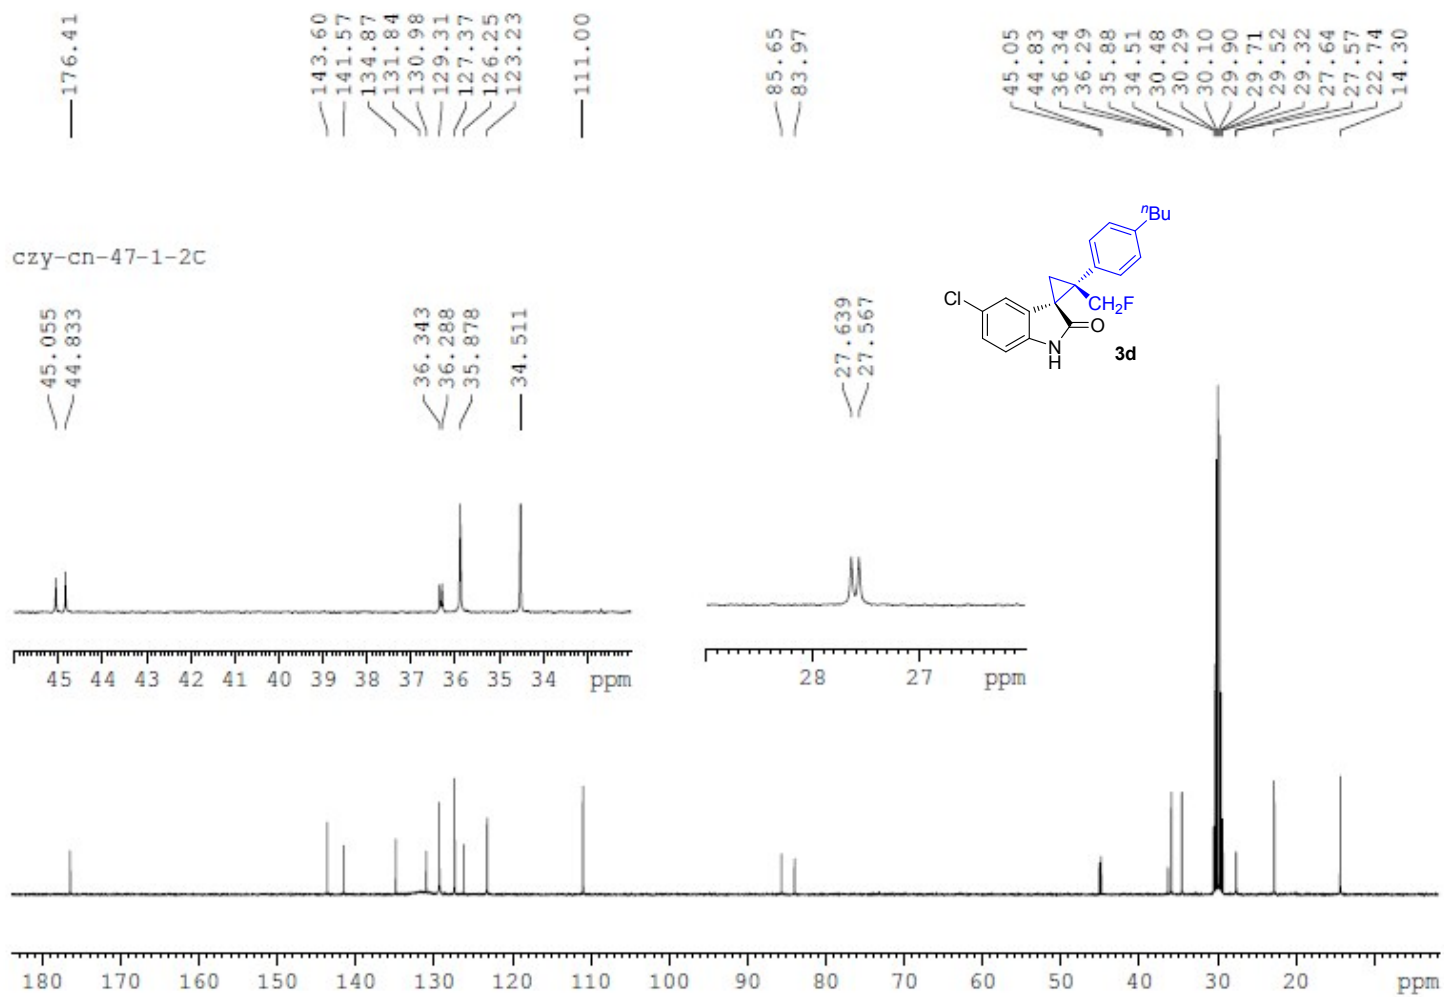

czy-cn-47-1+PhCF3

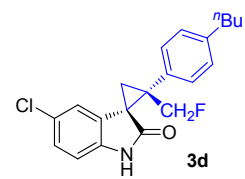

— -216.96

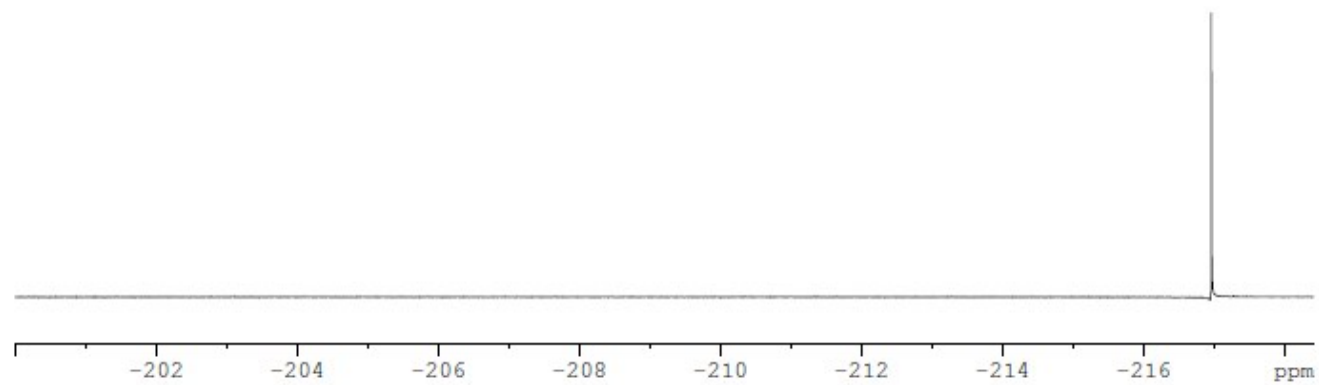

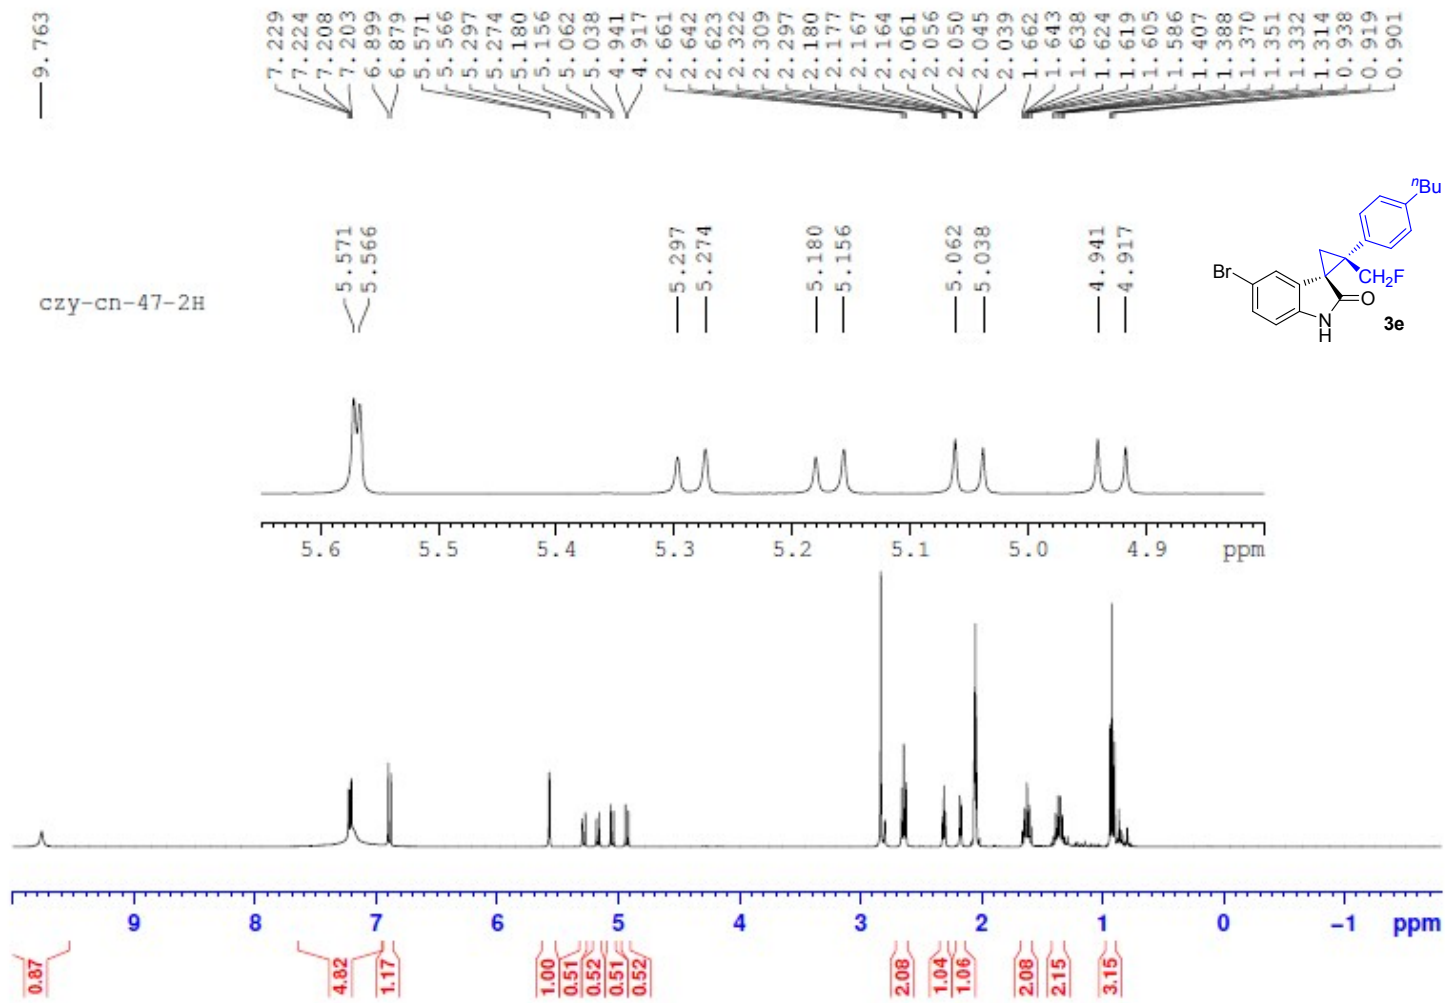

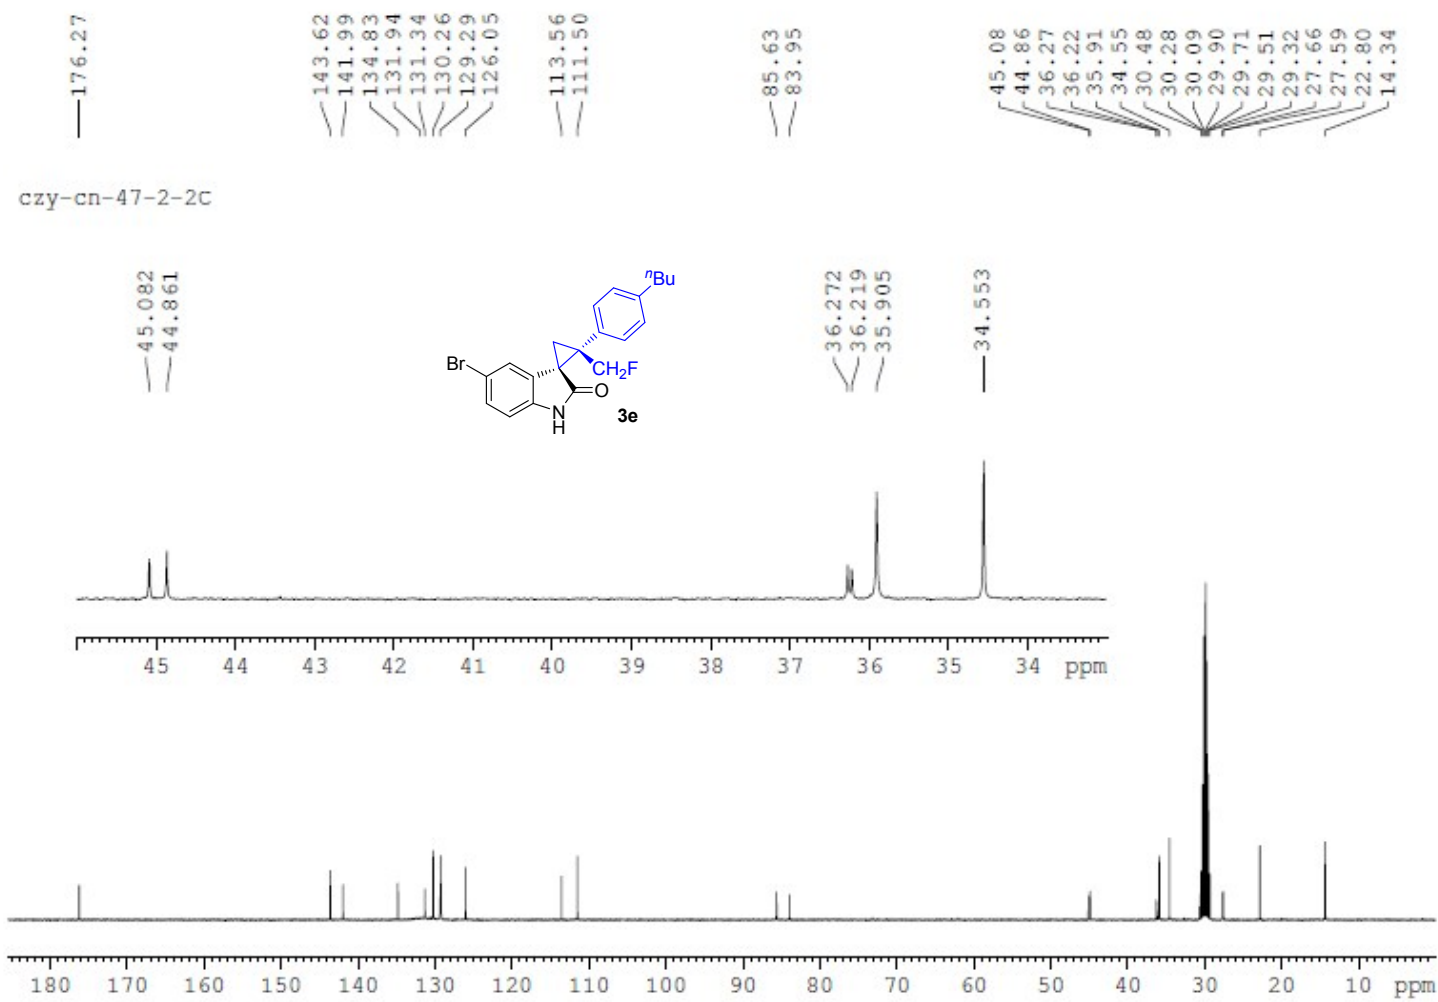

czy-cn-47-2+pHcf3

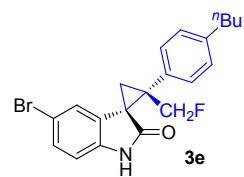

— -216.95

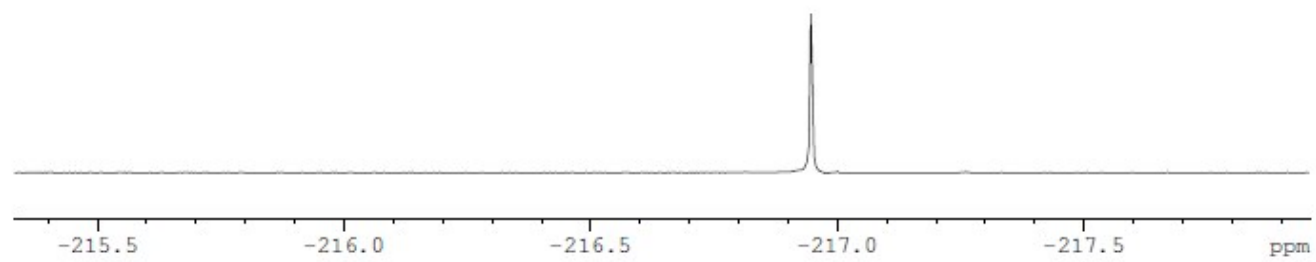



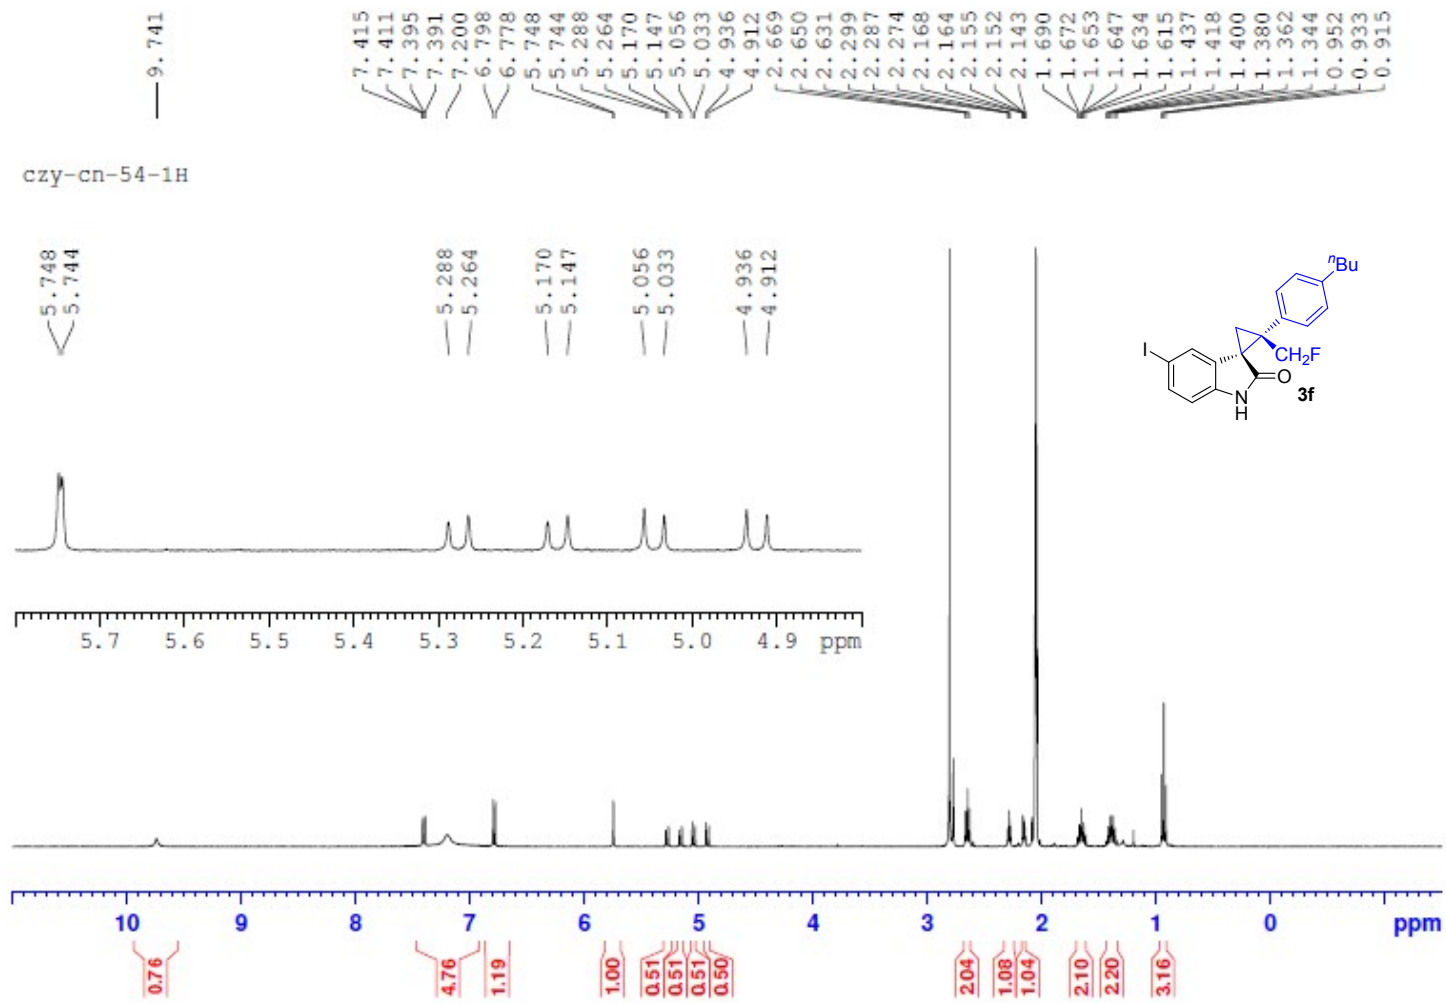

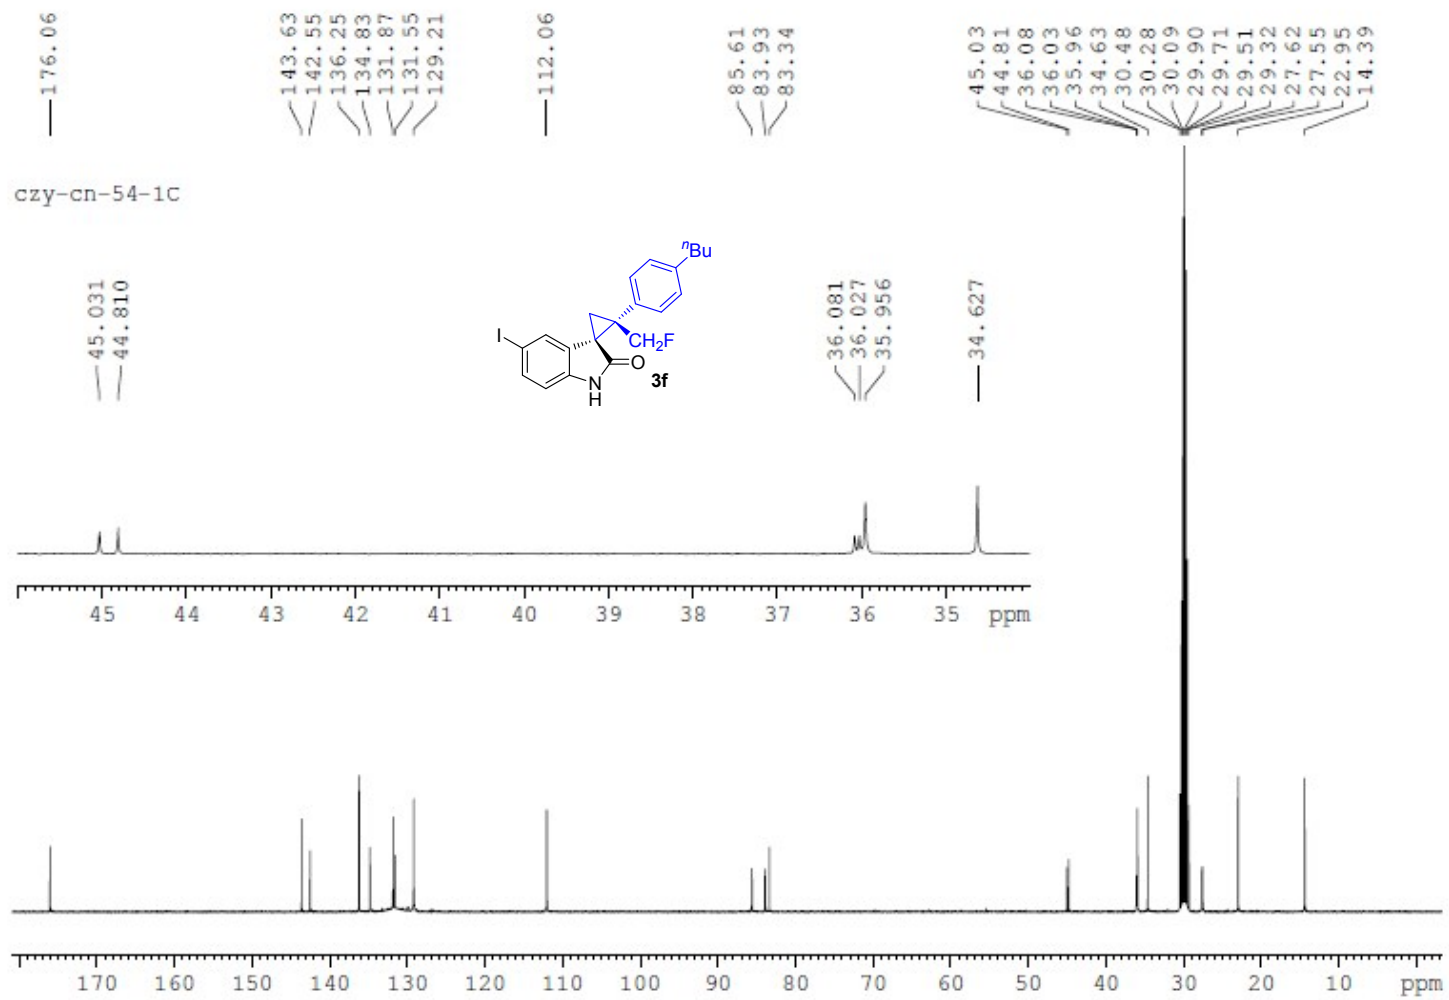

czy-cn-54-1+PhCF3

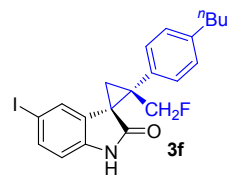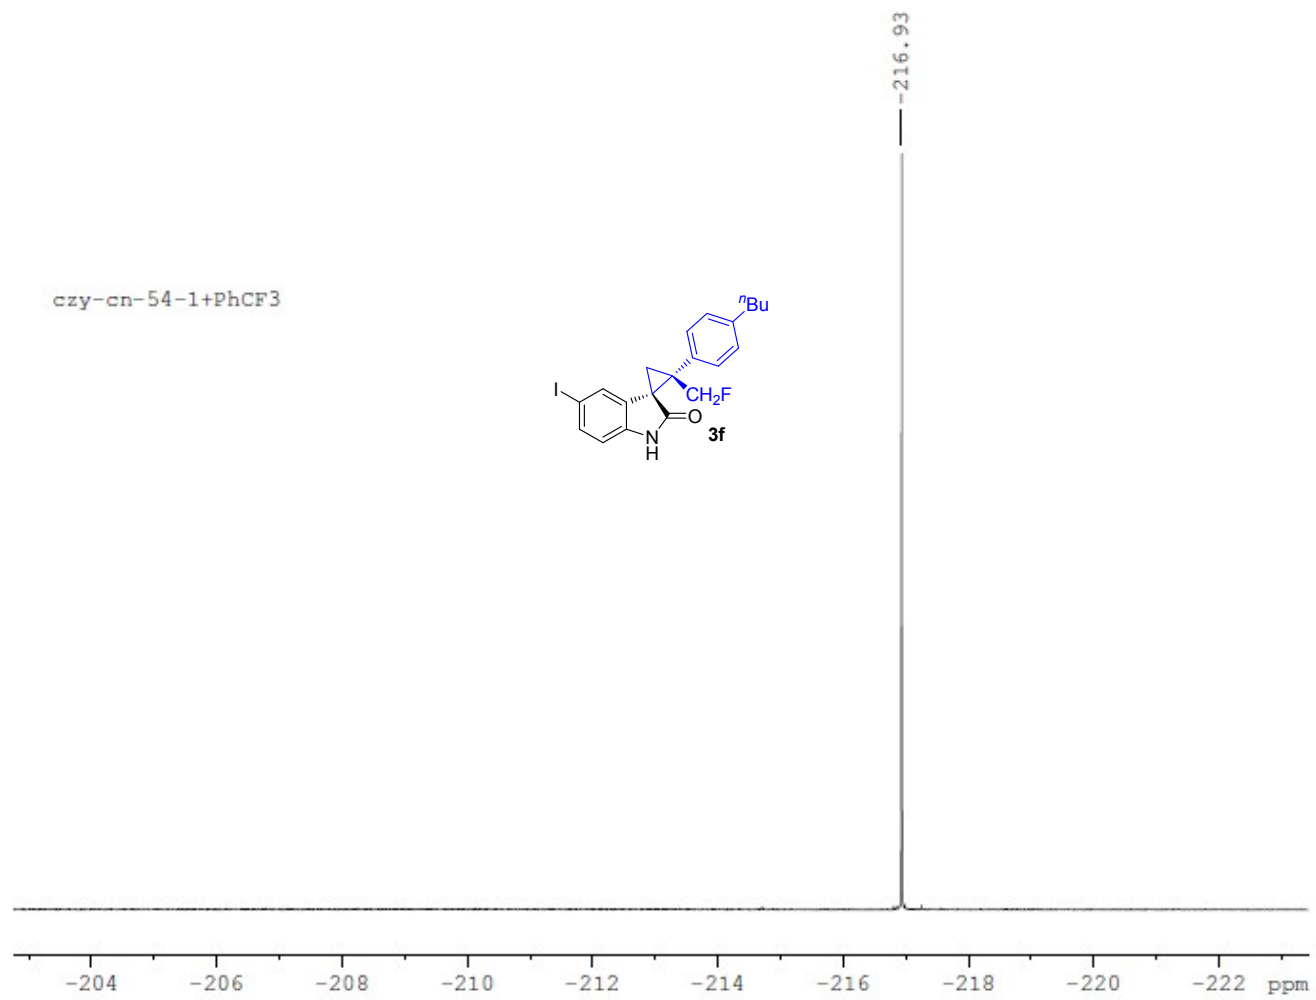

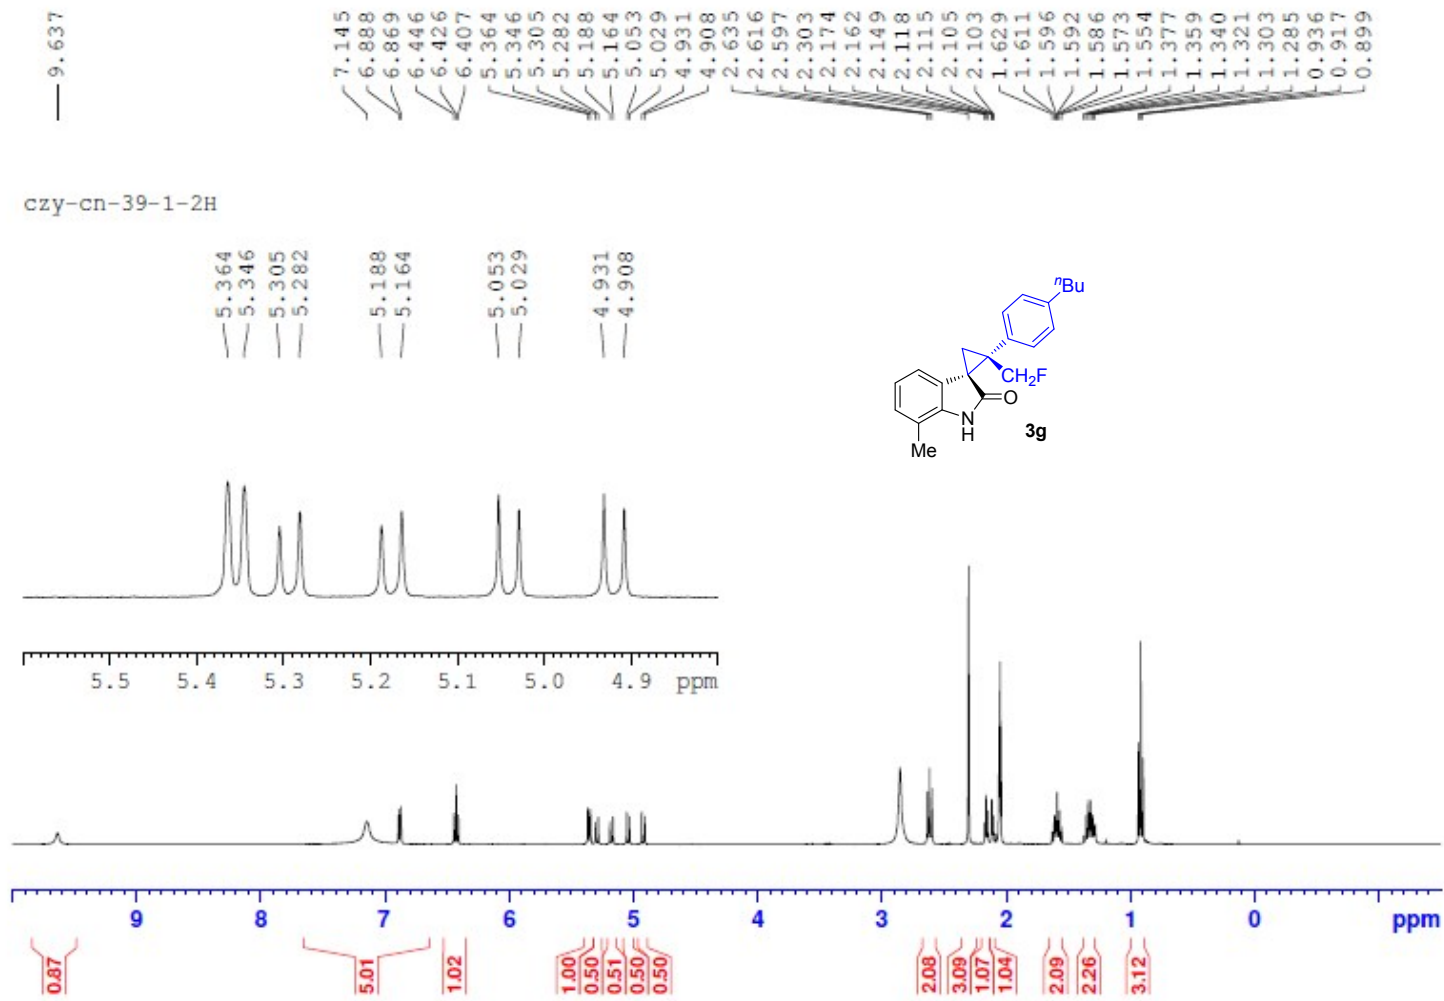

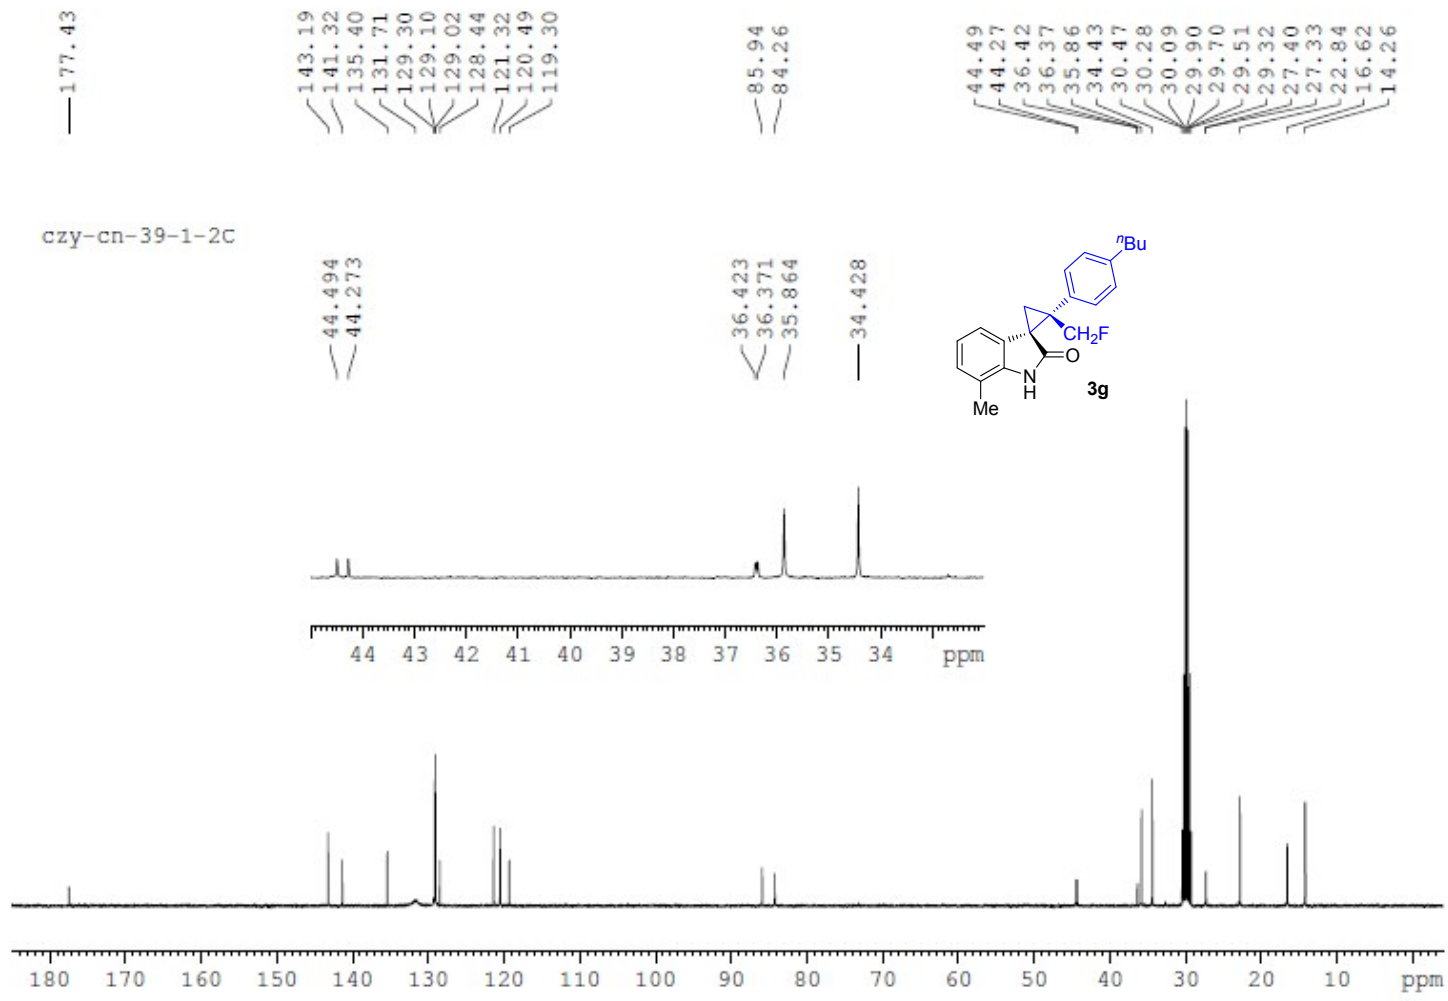

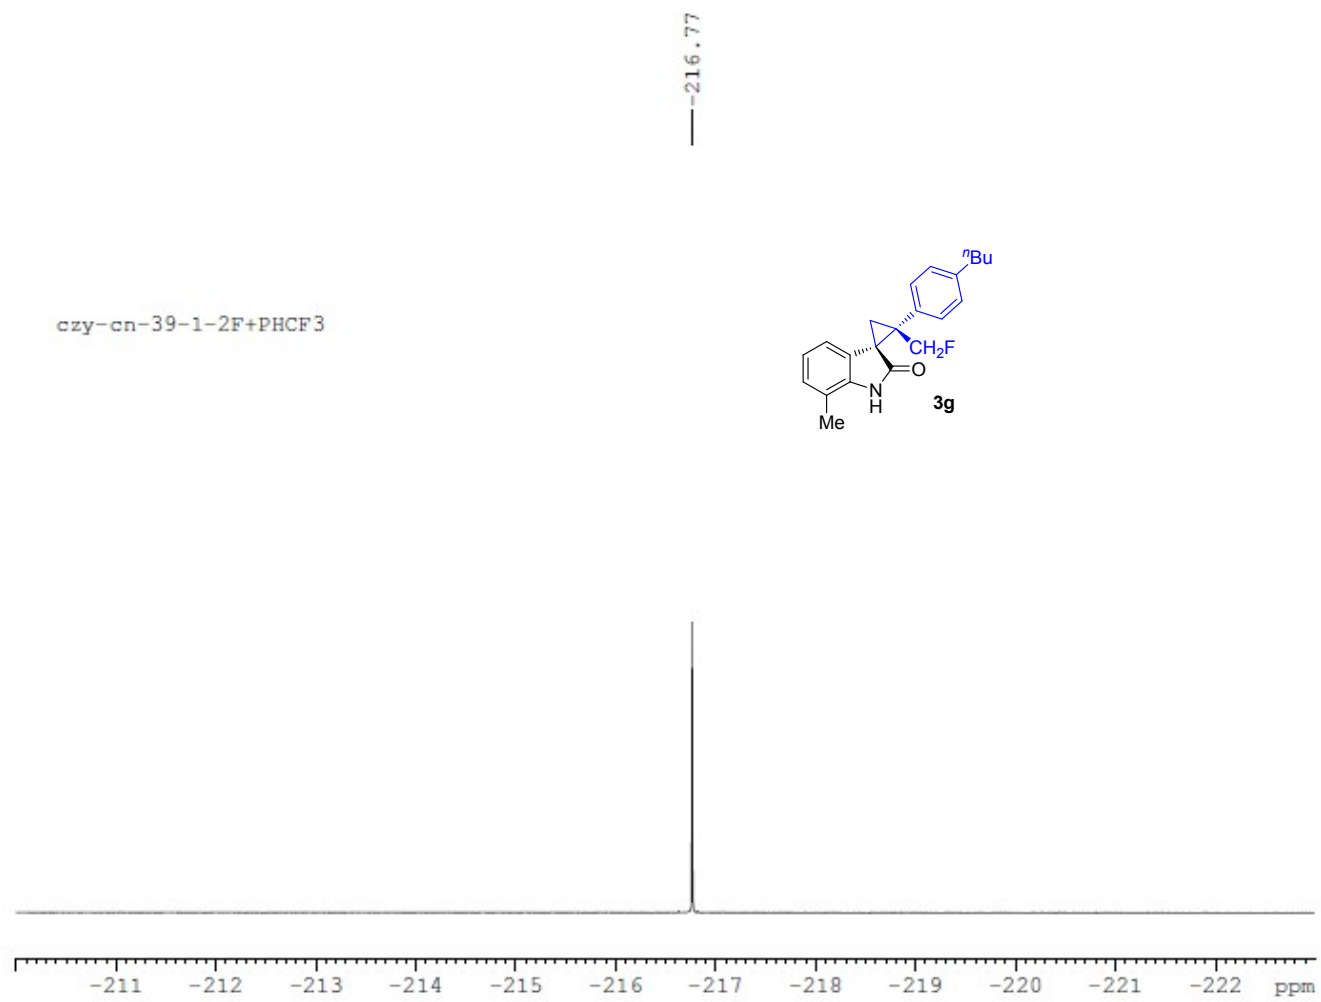

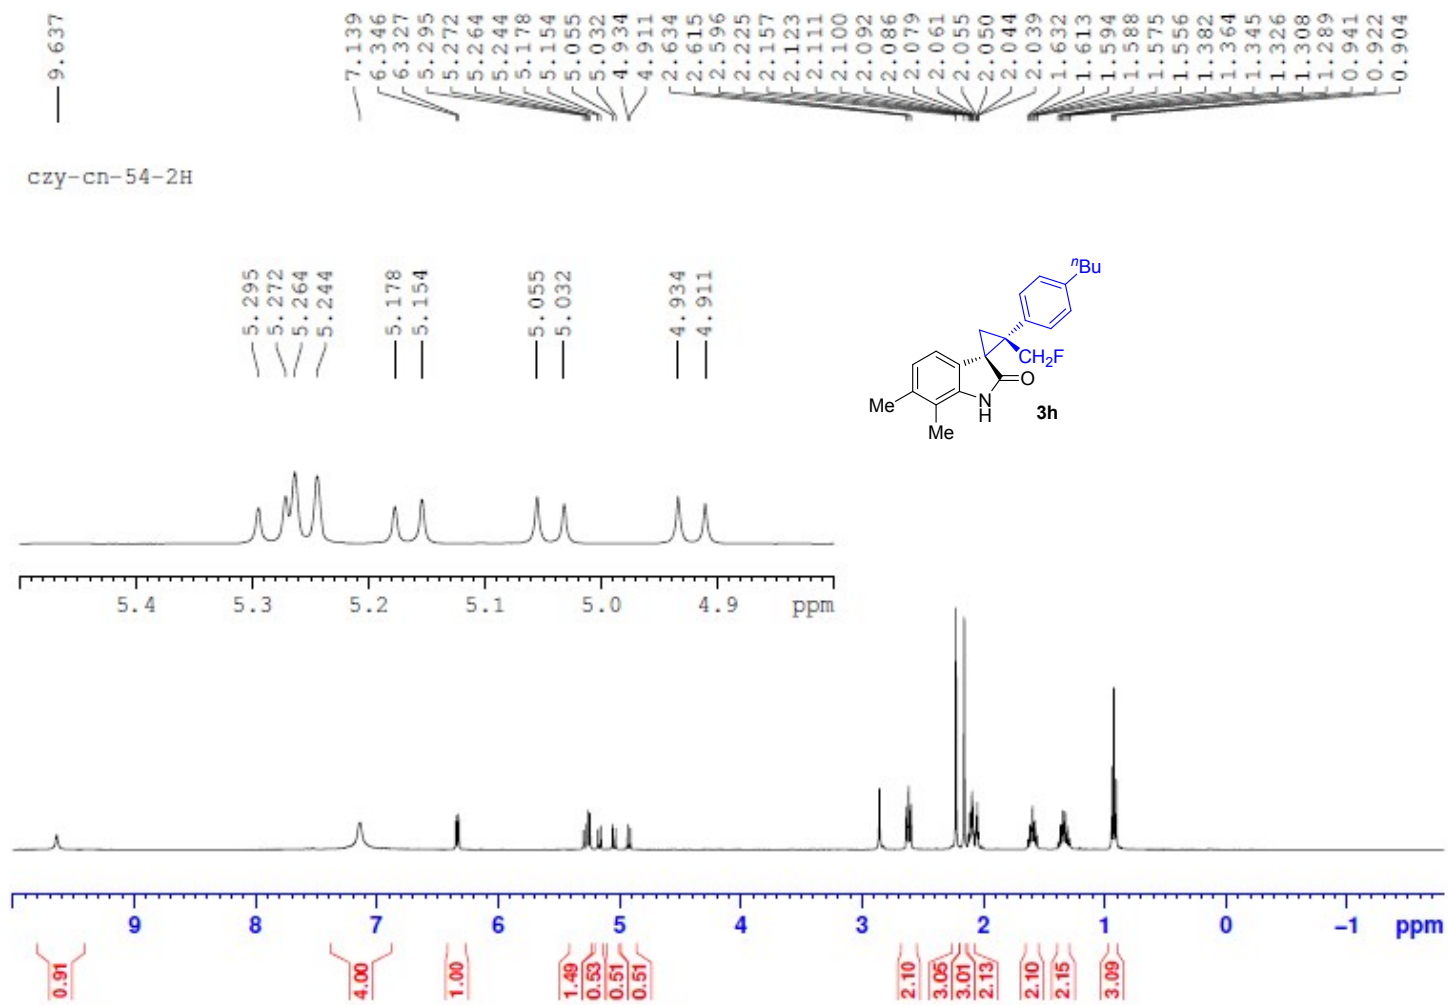

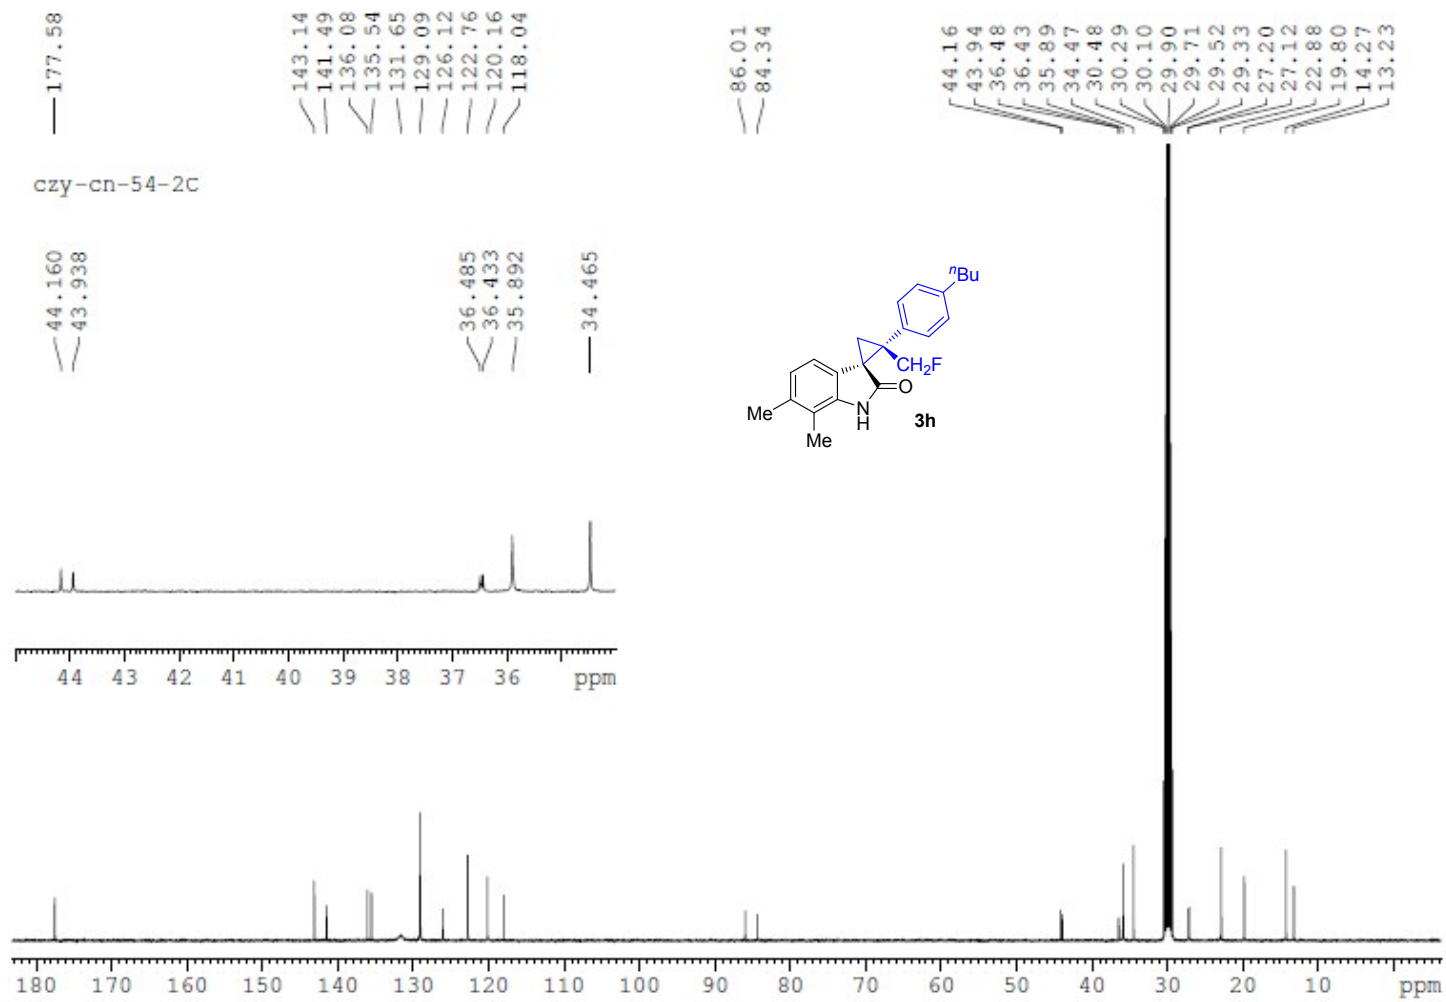



czy-cn-54-2+PhCF3

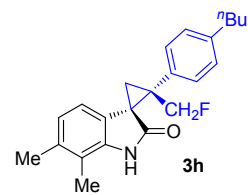

— -216.65

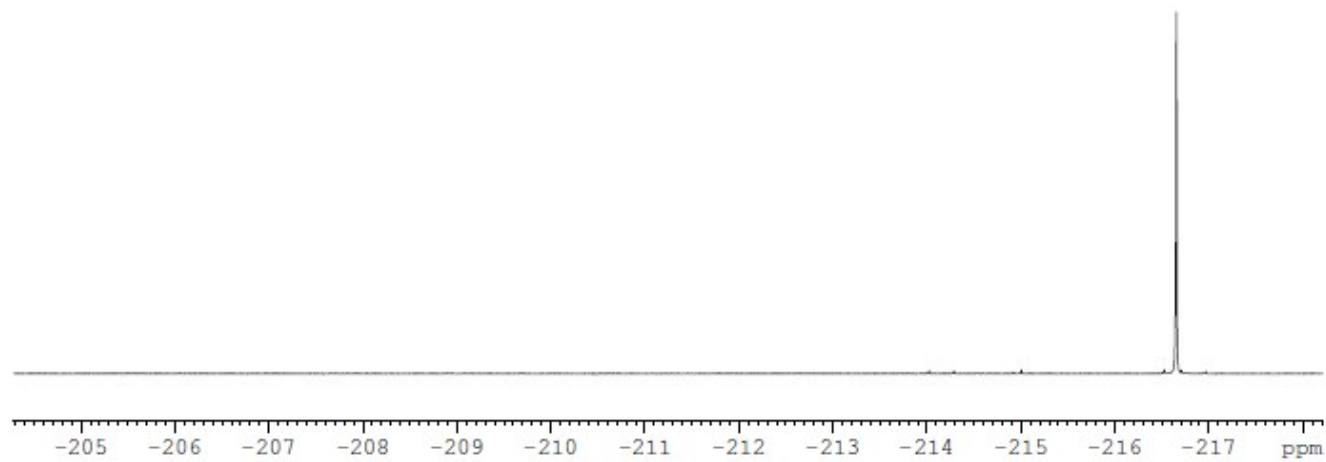

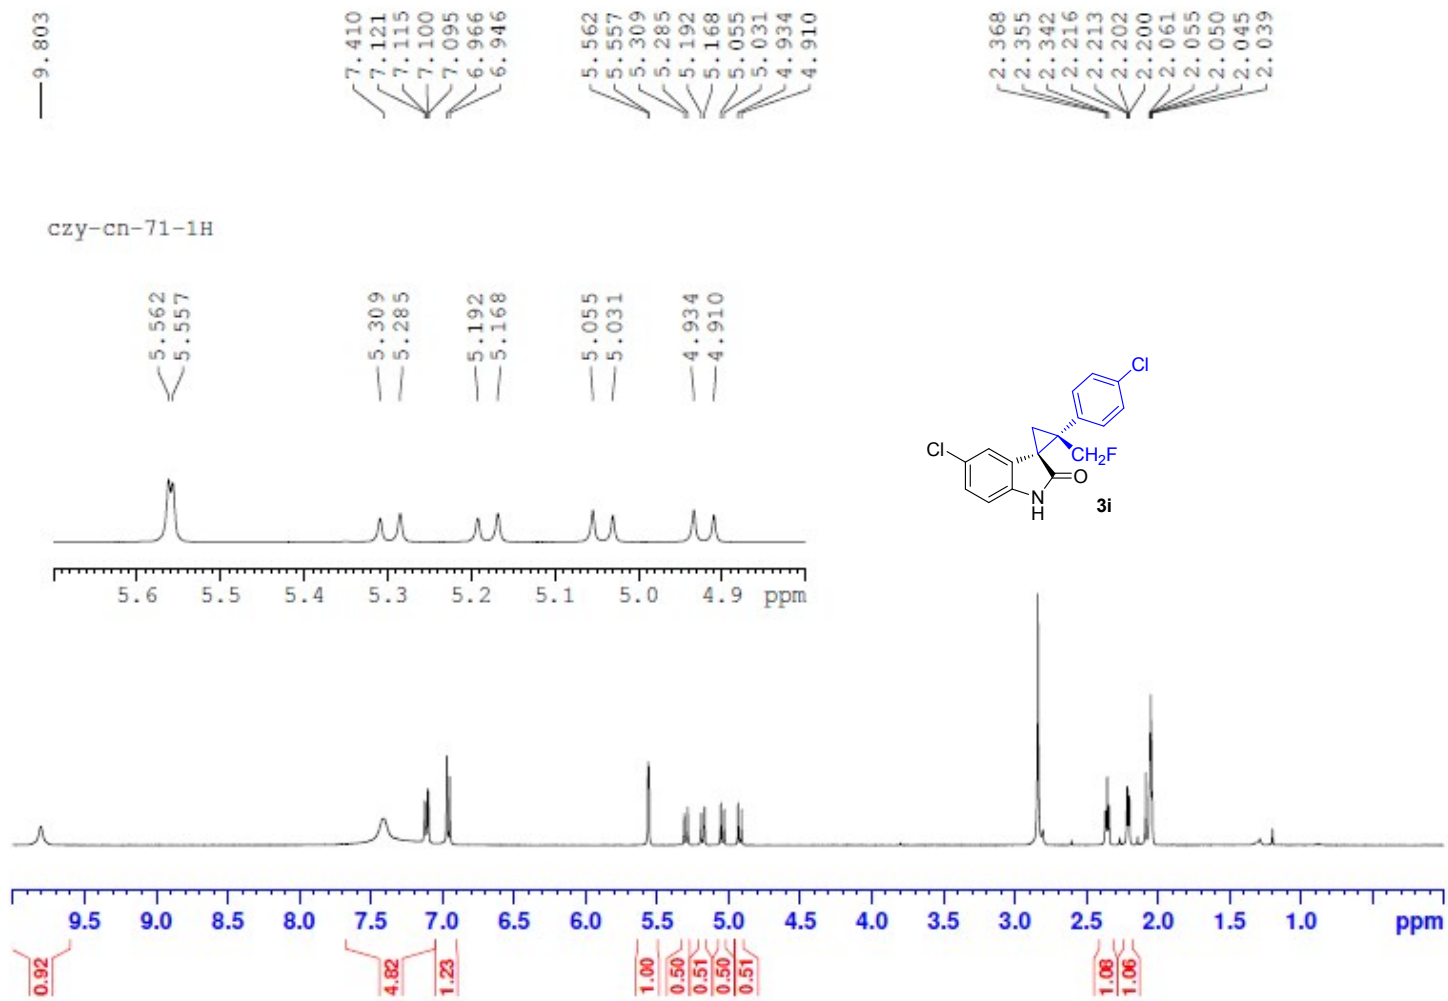

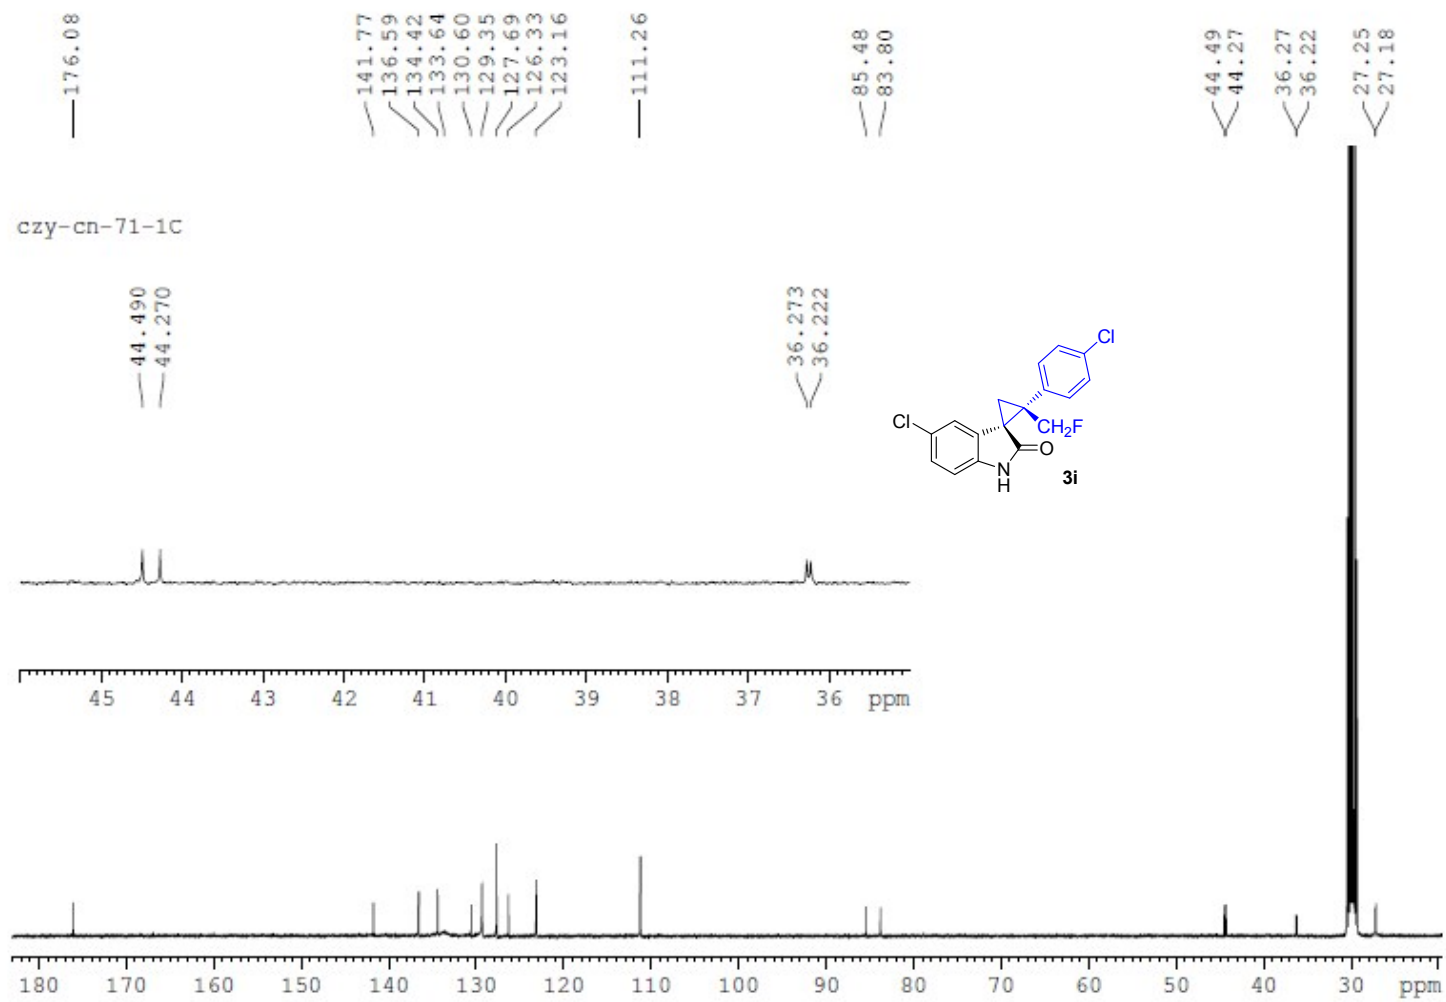

czy-cn-71-1-2+PhCF3

-217.17

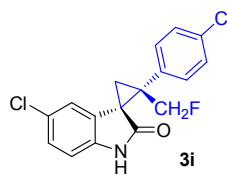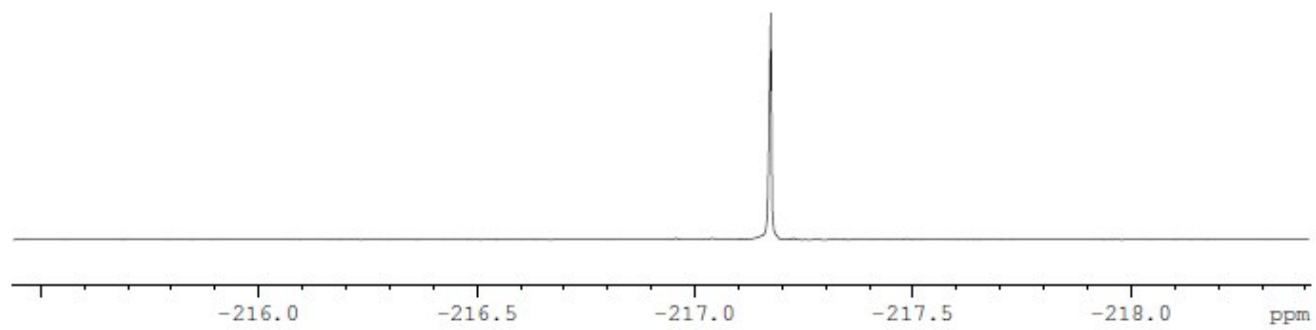

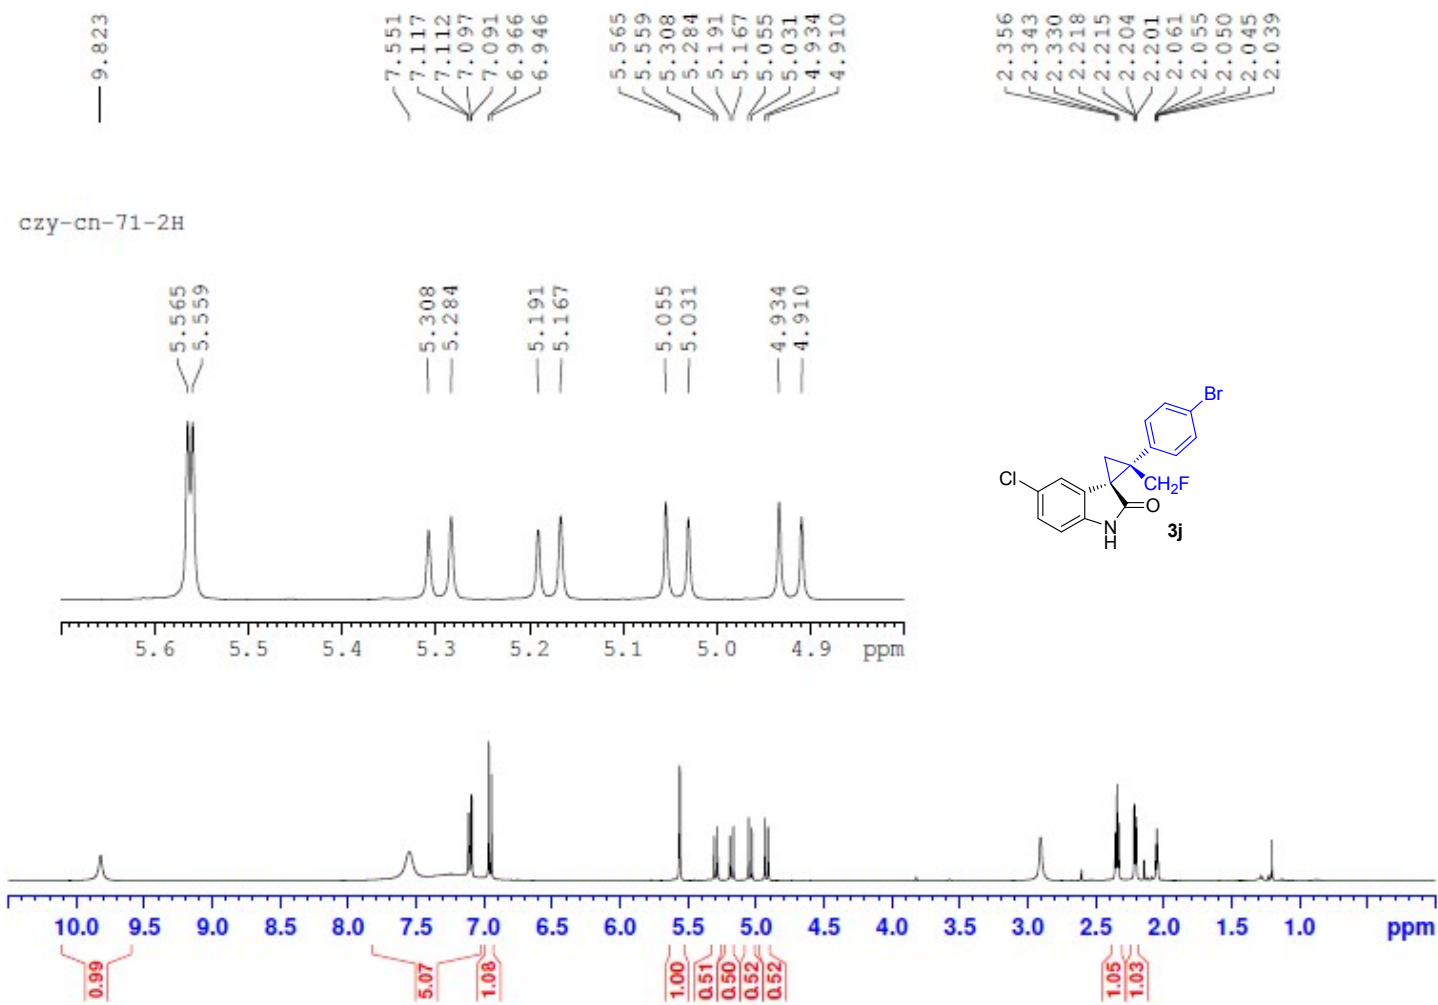

— 176.09

141.72  
137.00  
134.00  
132.33  
130.54  
127.68  
126.32  
123.12  
122.56

— 111.25

85.40  
83.72

44.54  
44.32  
36.21  
36.16  
30.48  
30.28  
30.09  
29.90  
29.71  
29.51  
29.32  
27.19  
27.12

czy-cn-71-2c

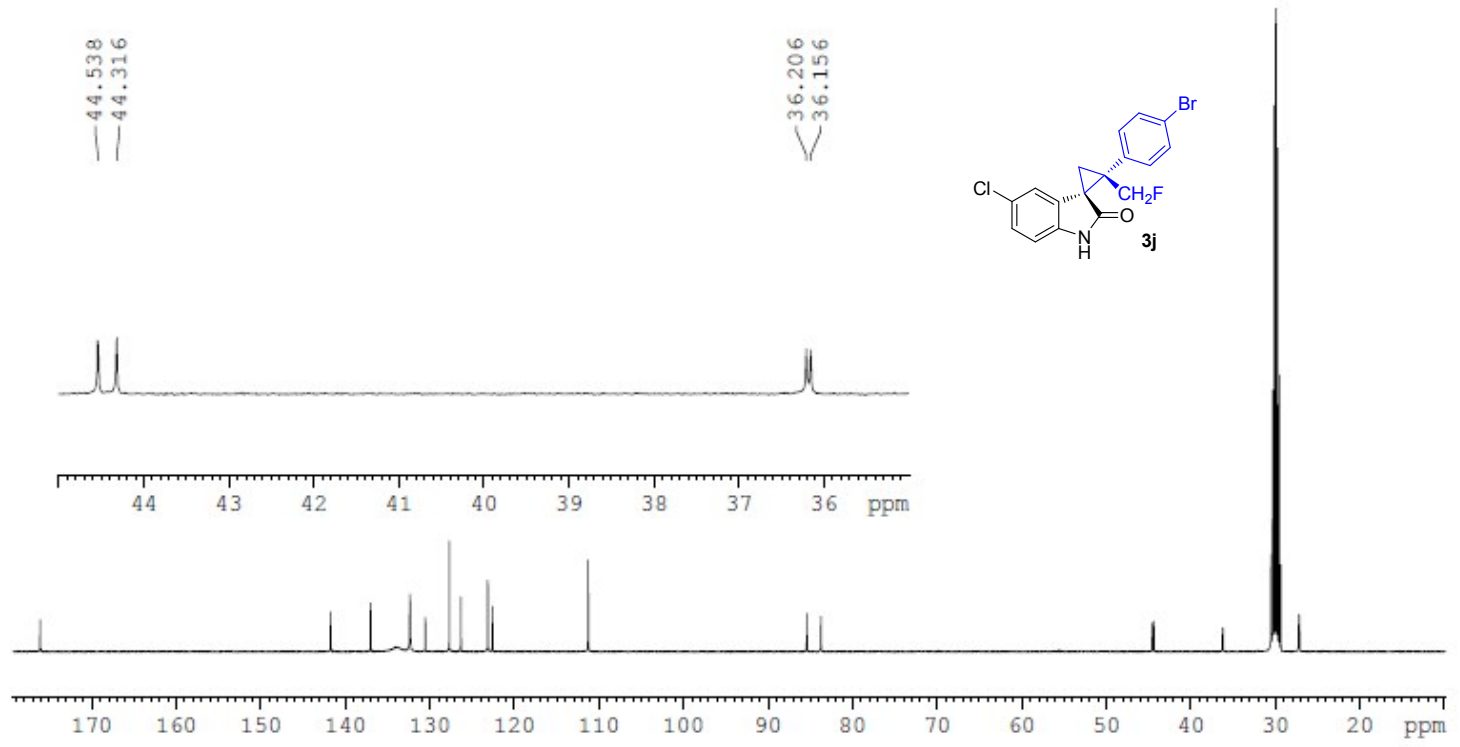

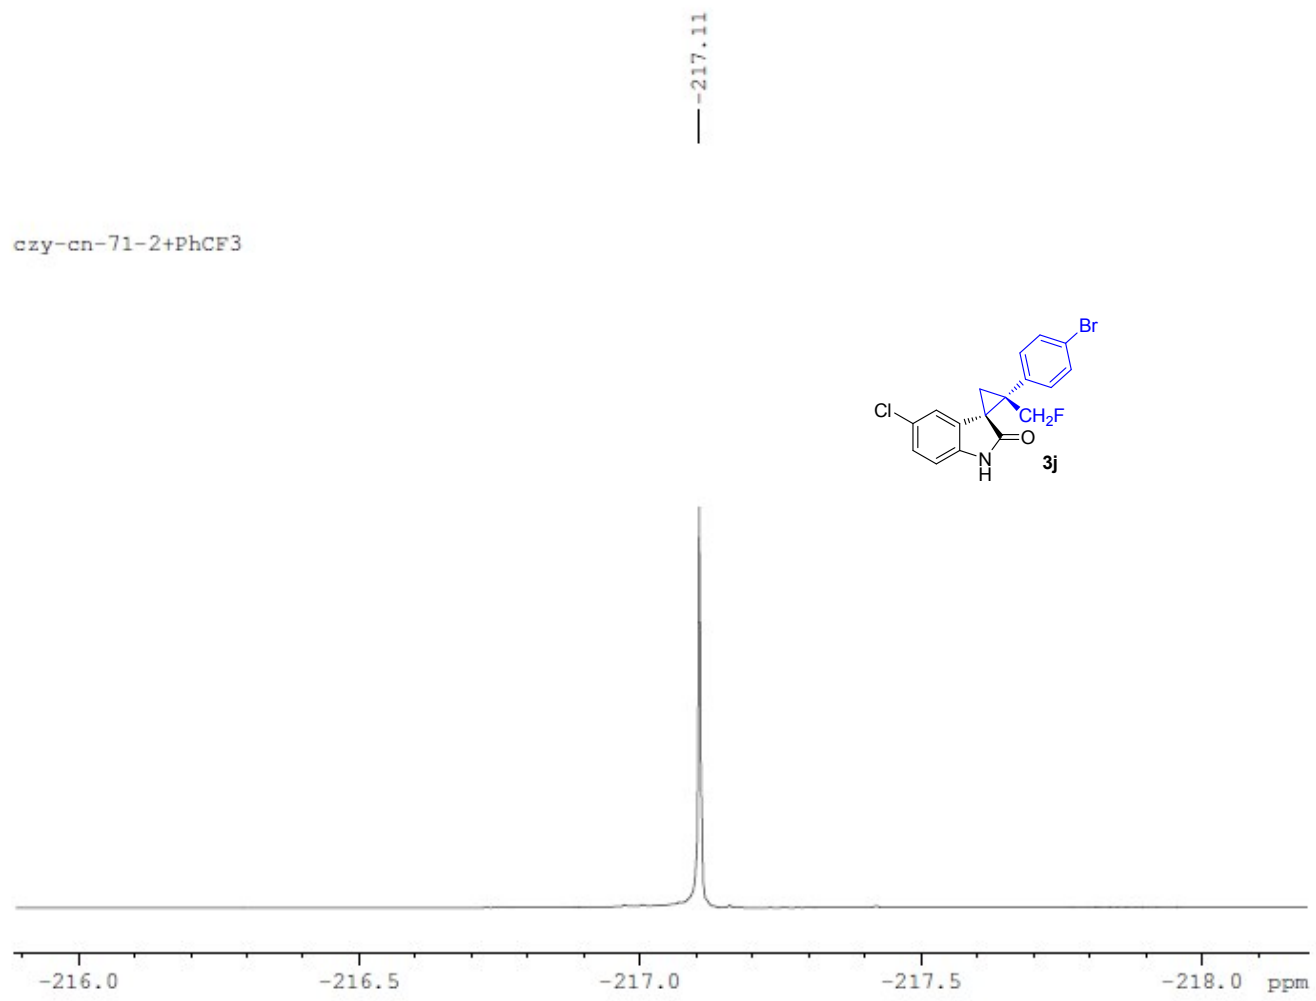

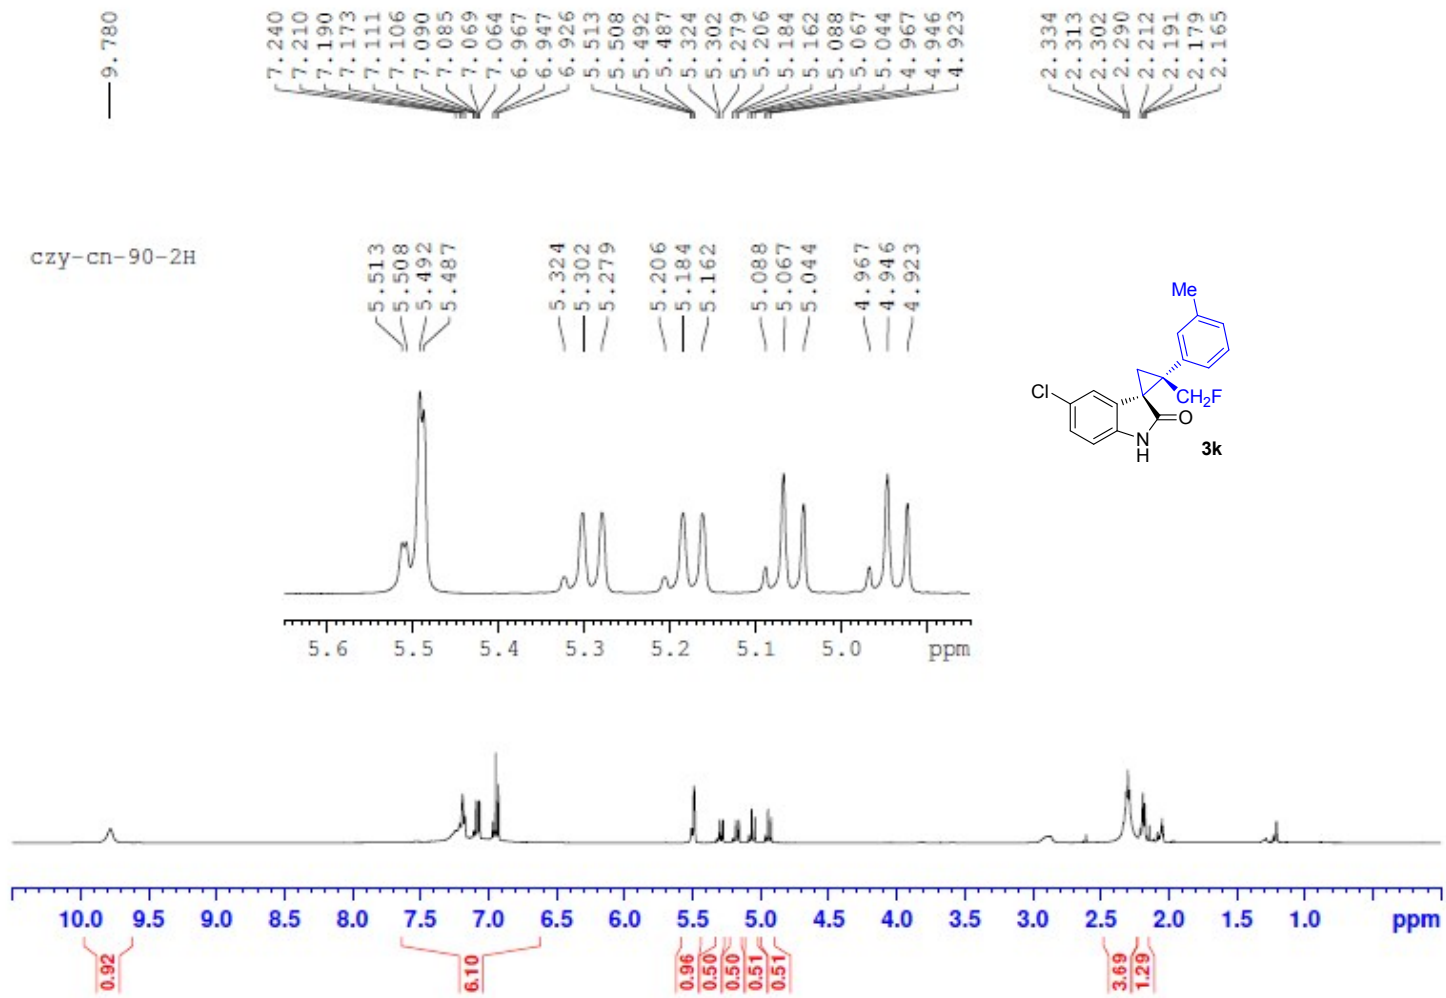



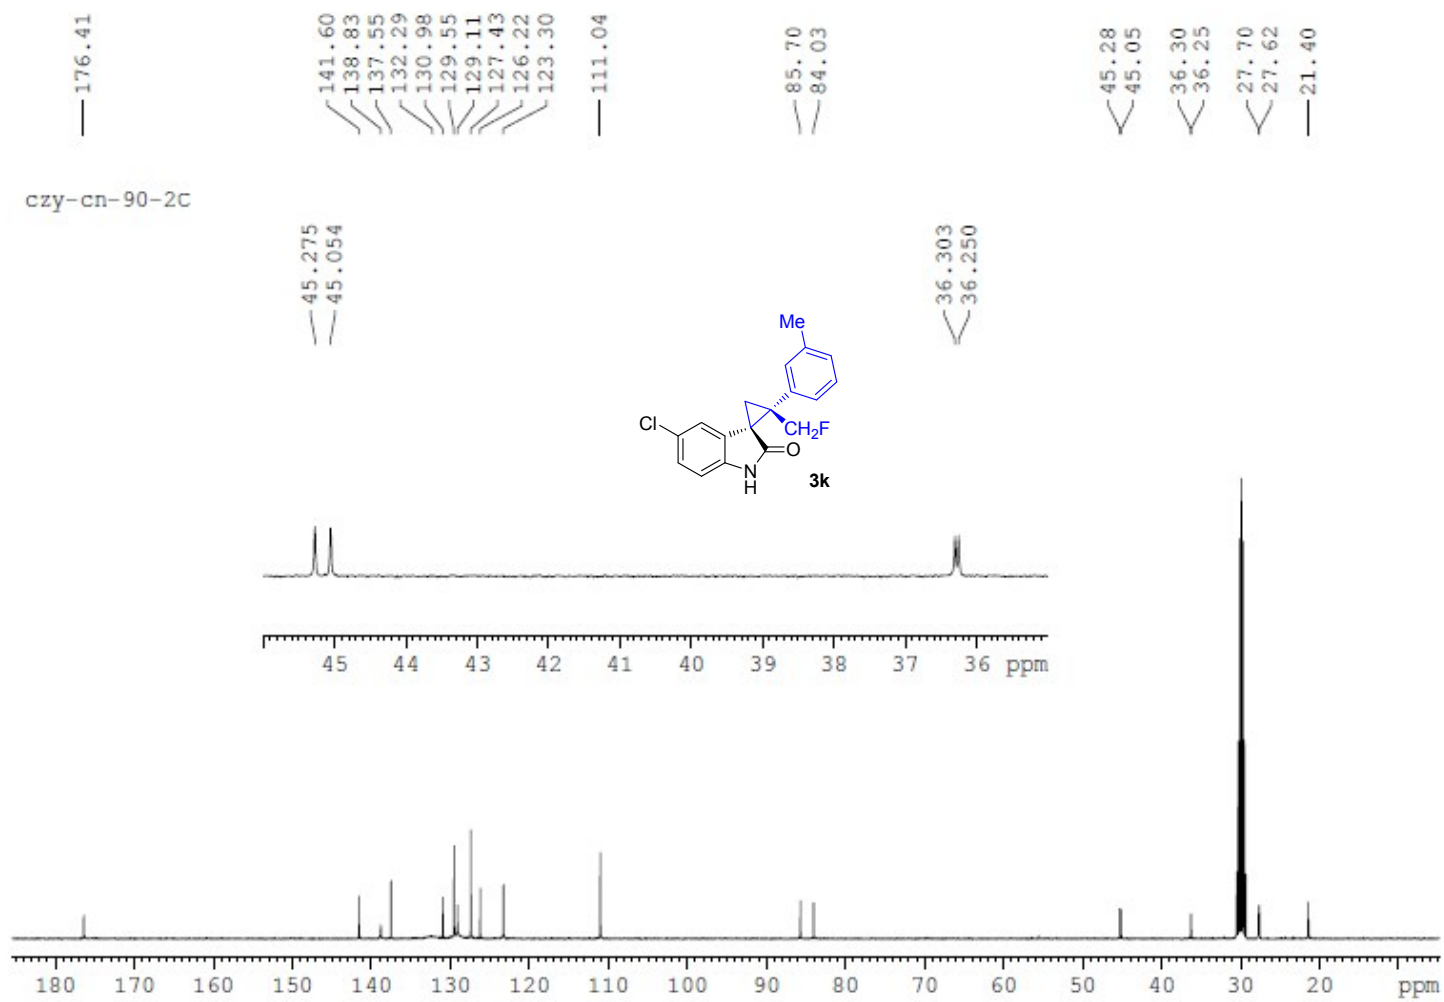

czy-cn-90-2F

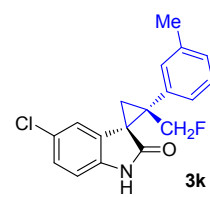

-216.89

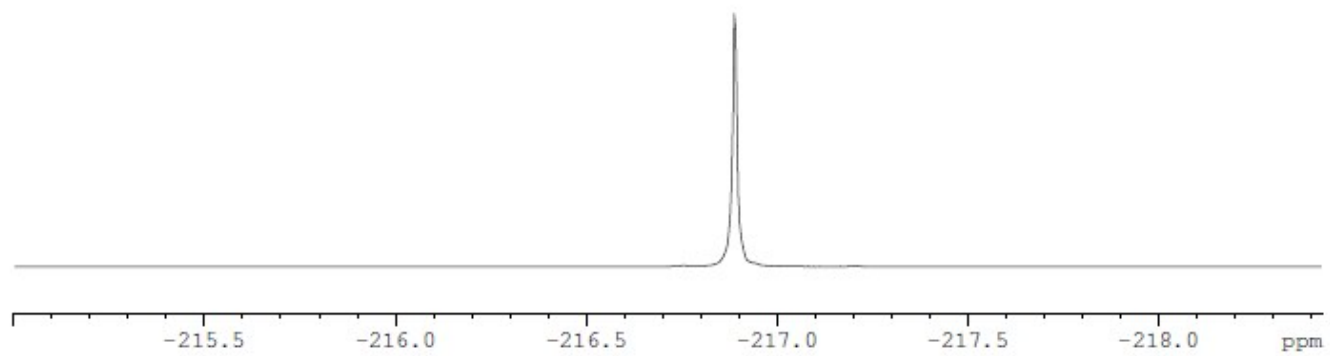

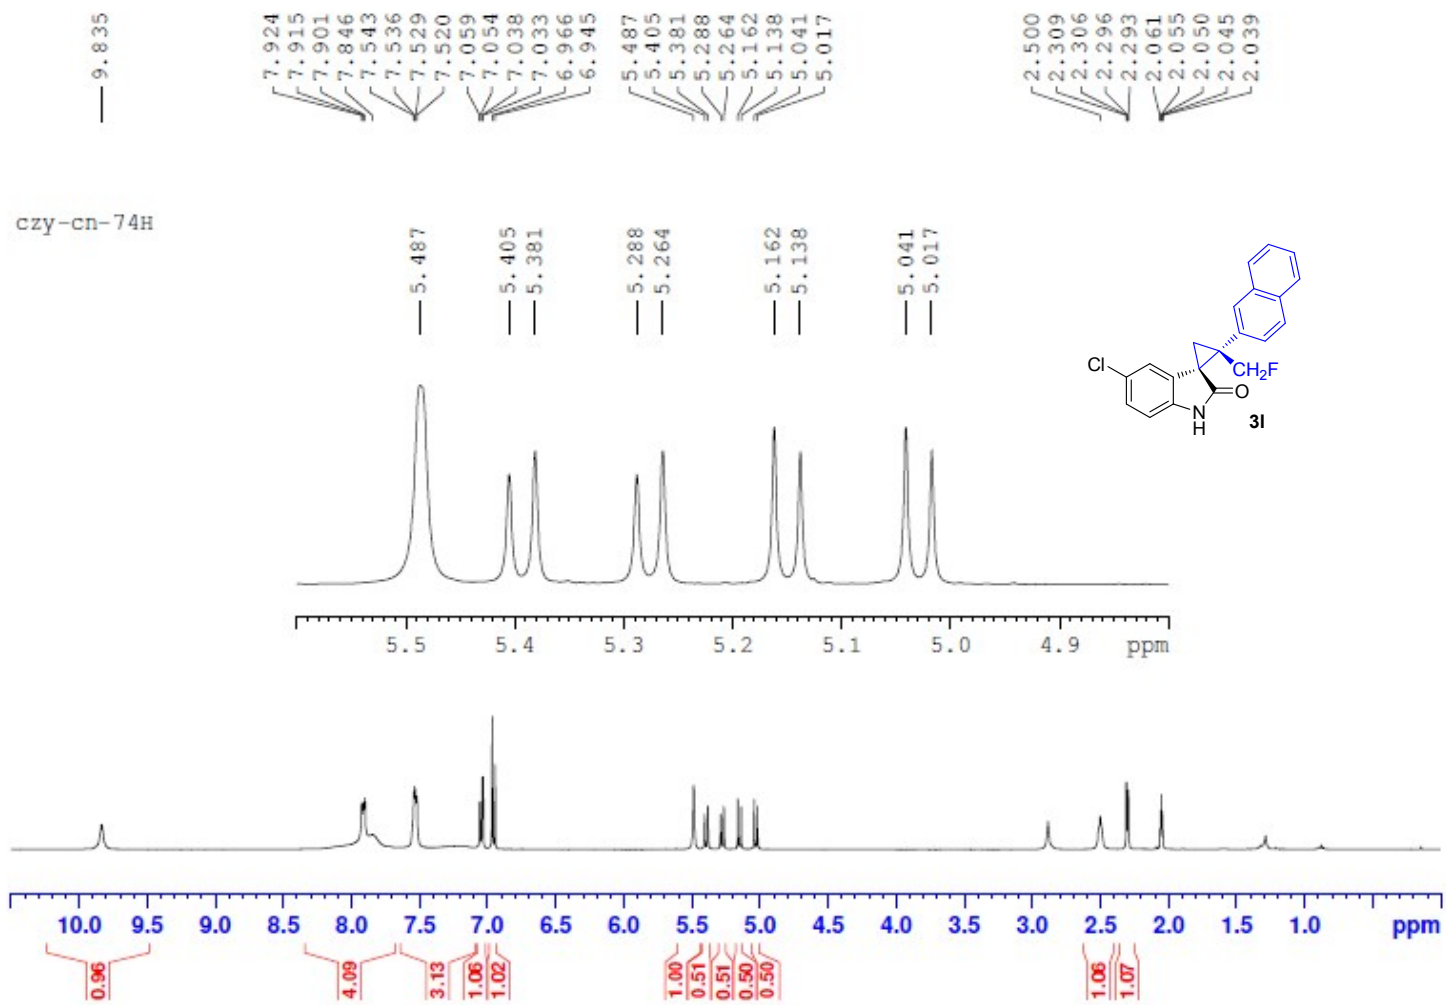

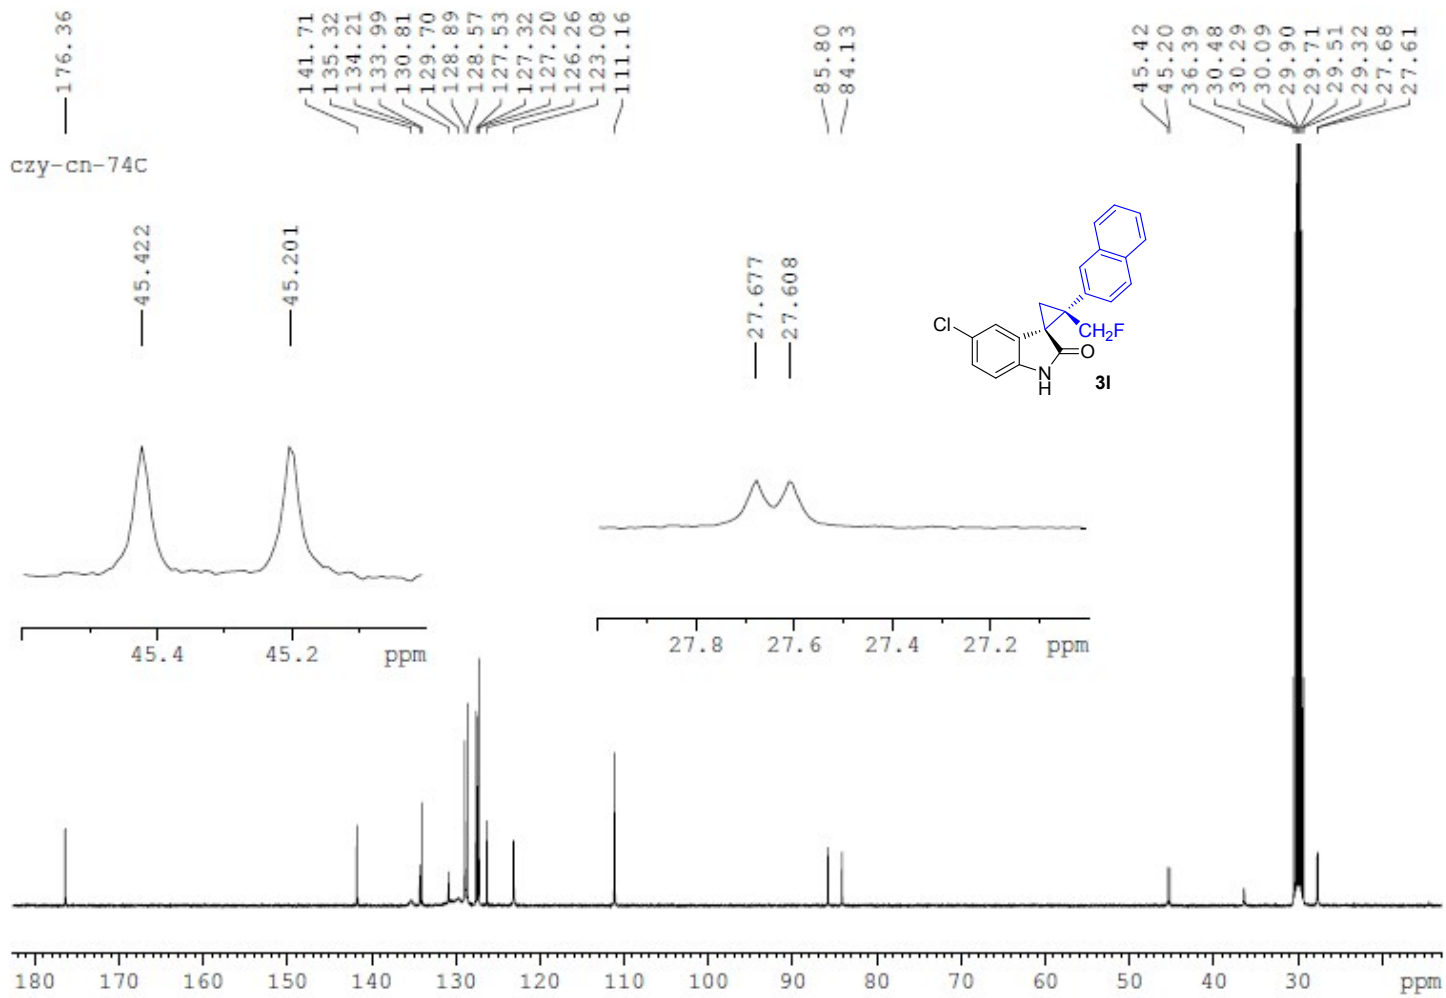

czy-cn-74F

— -216.79

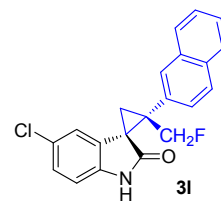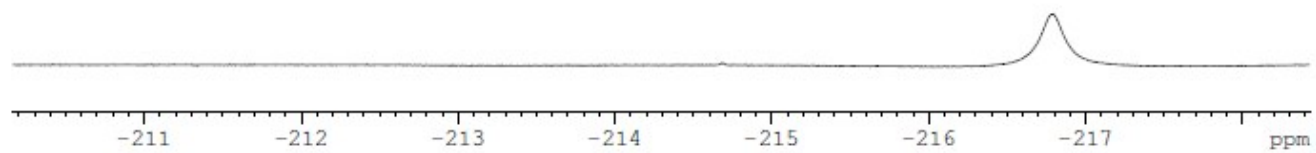

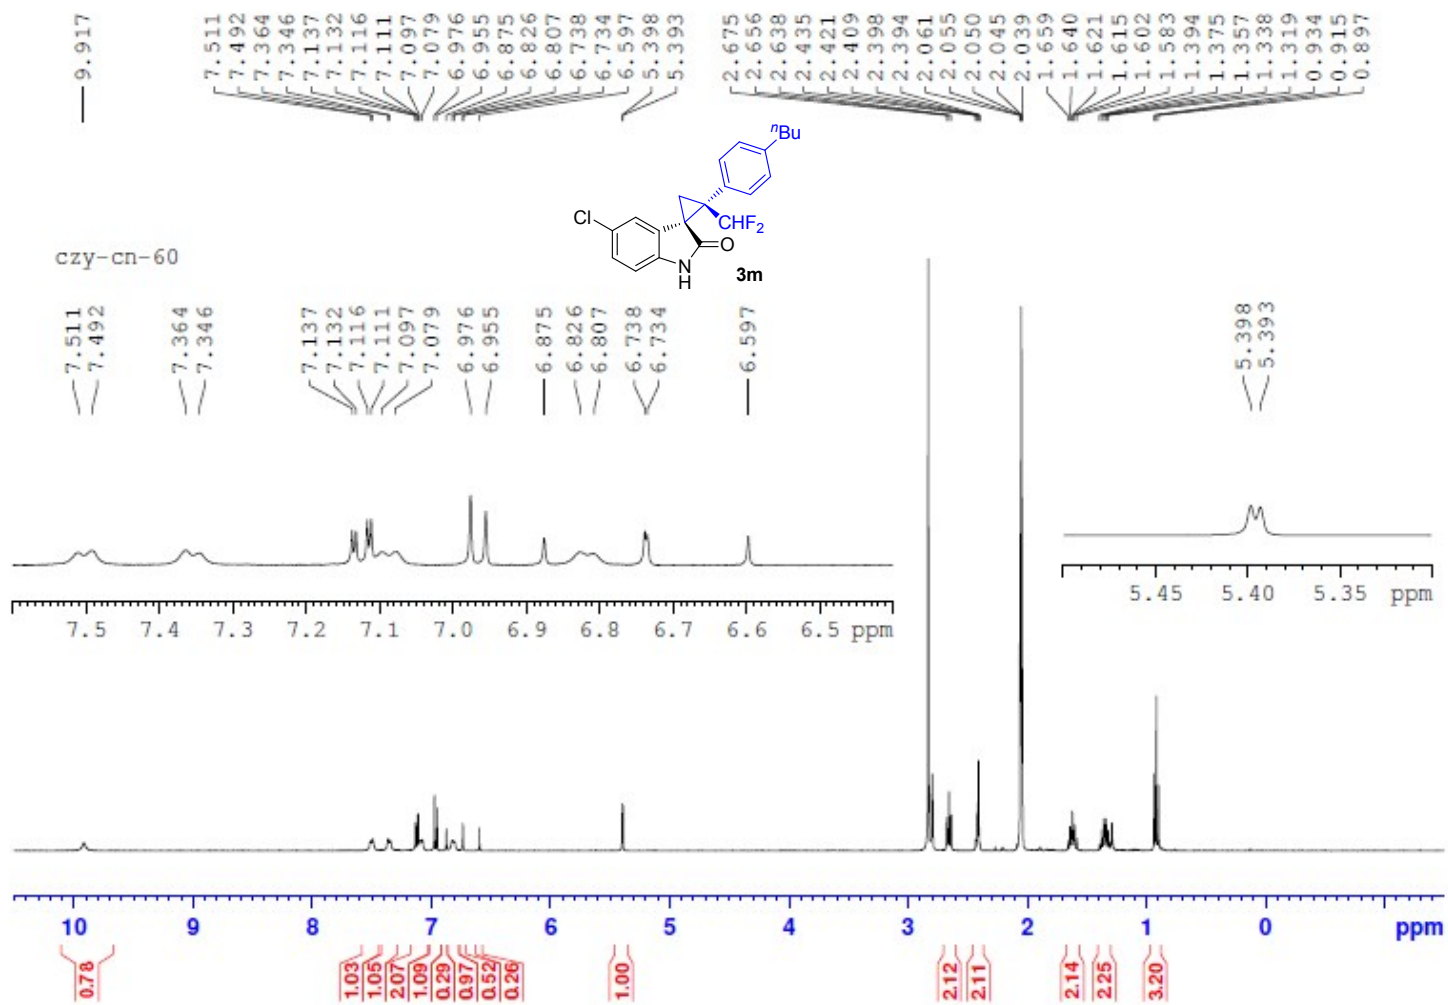

--114.53  
--115.29

--121.10  
--121.86

CZY-CN-60+pHcf3

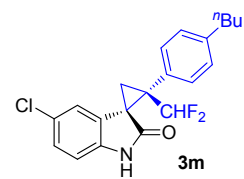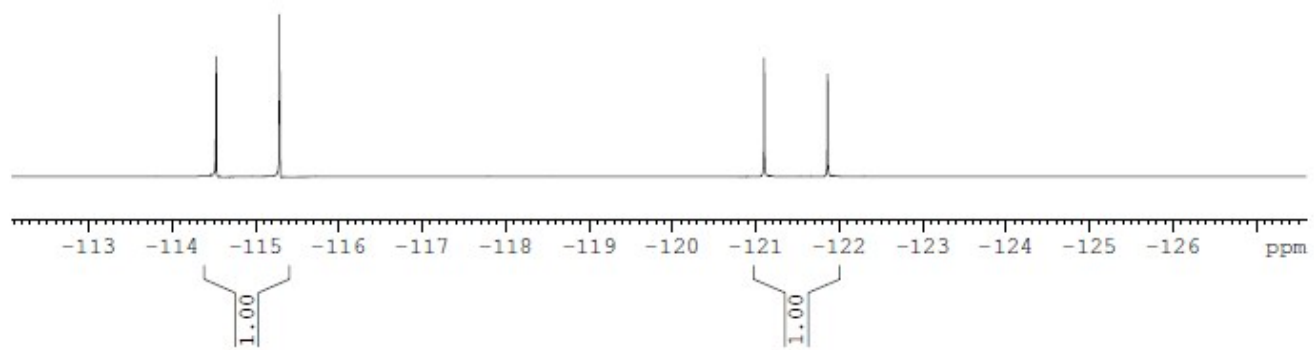

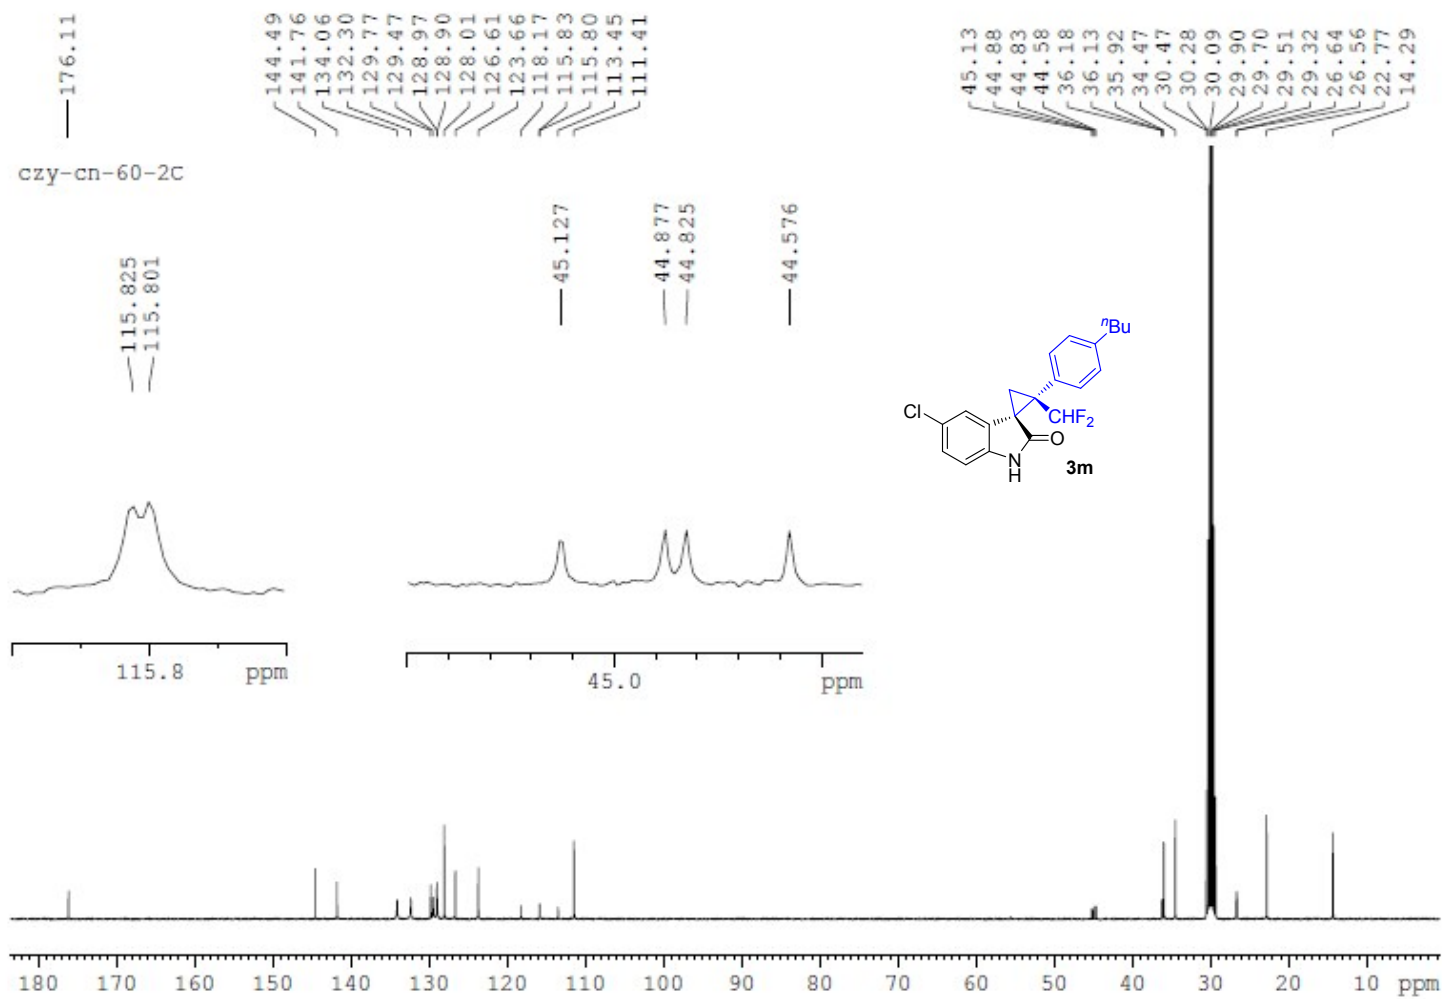



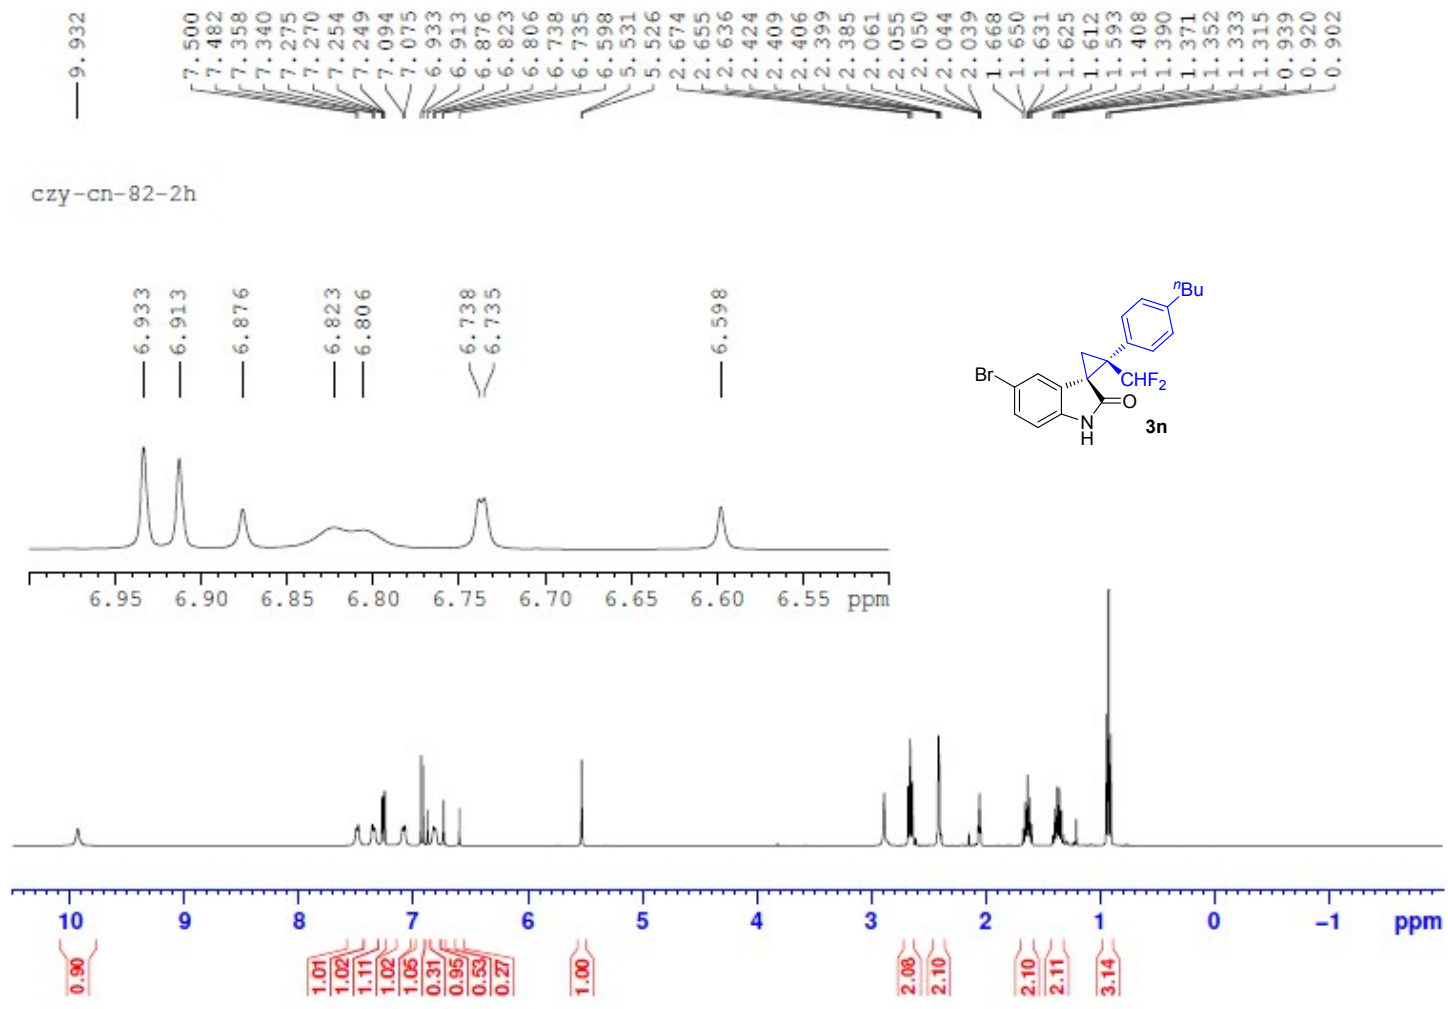

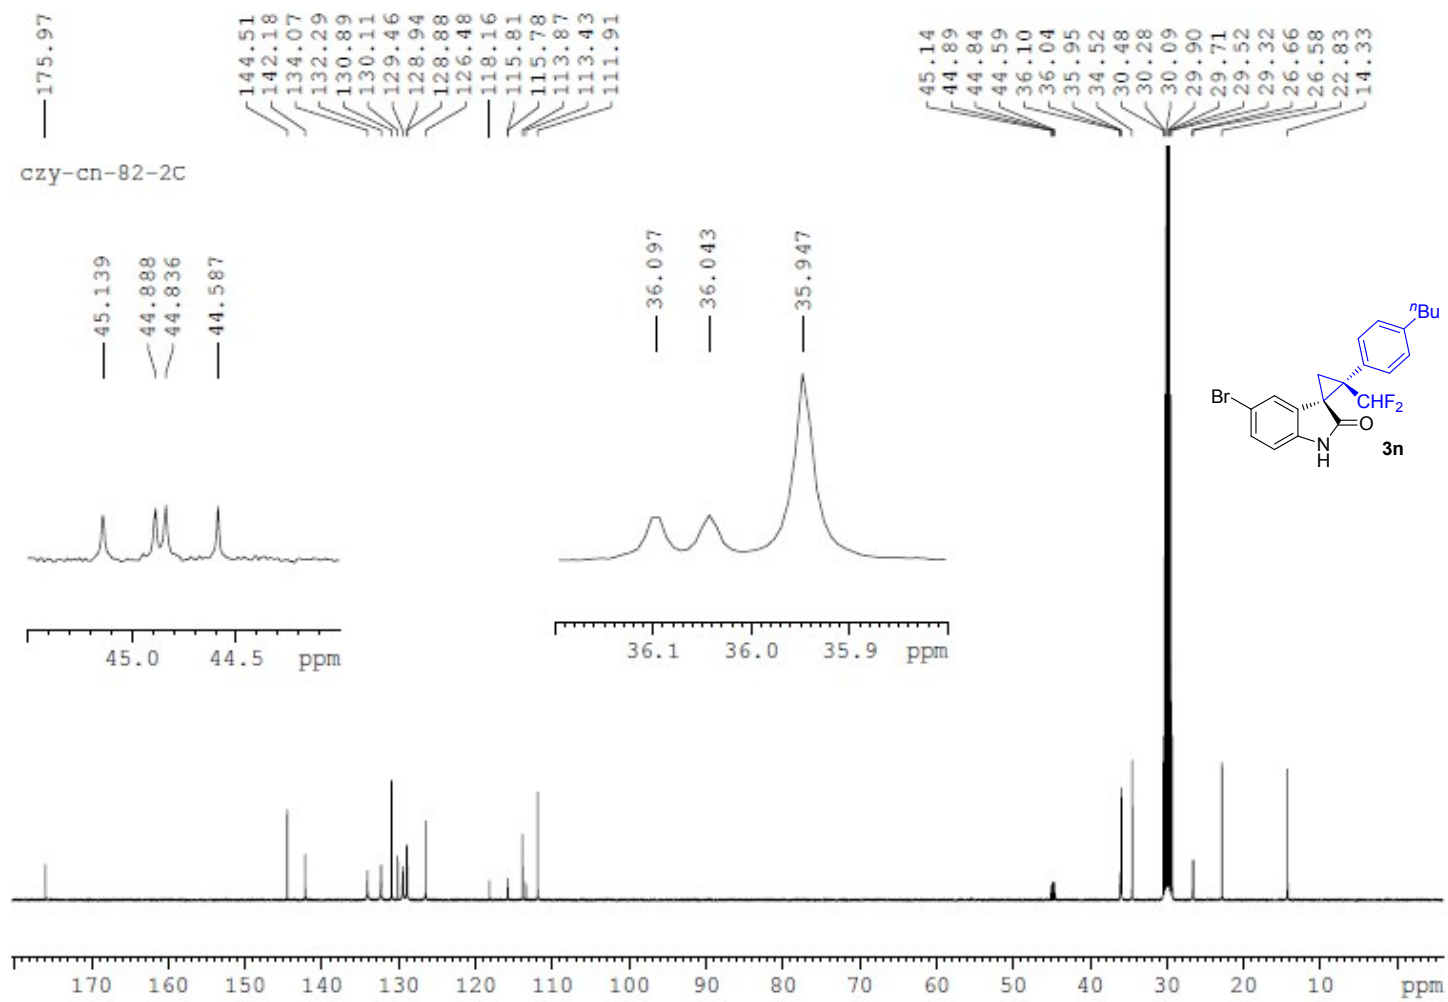

-114.54  
-115.30

-121.09  
-121.85

czy-cn-82-2+PhCF3

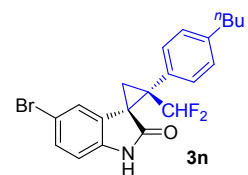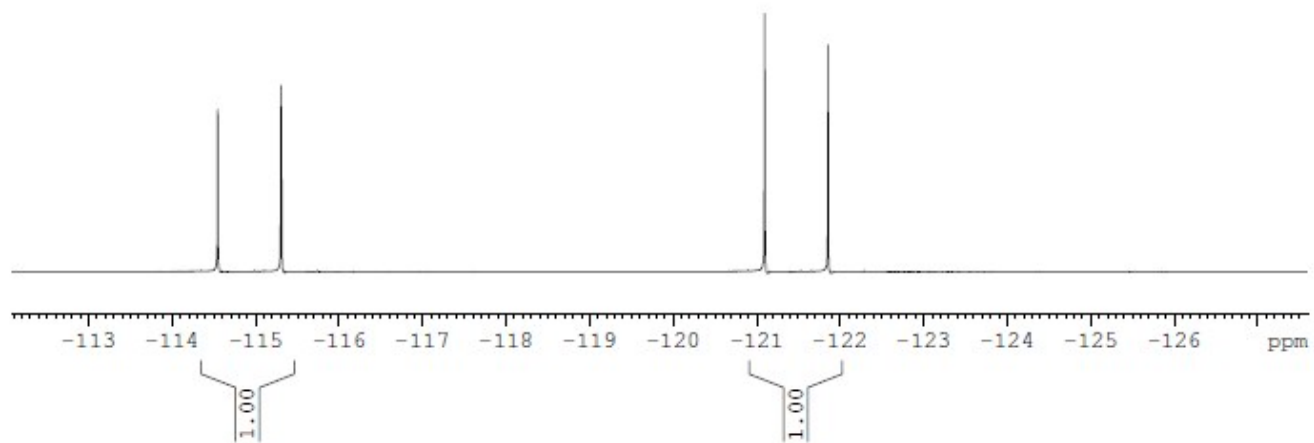

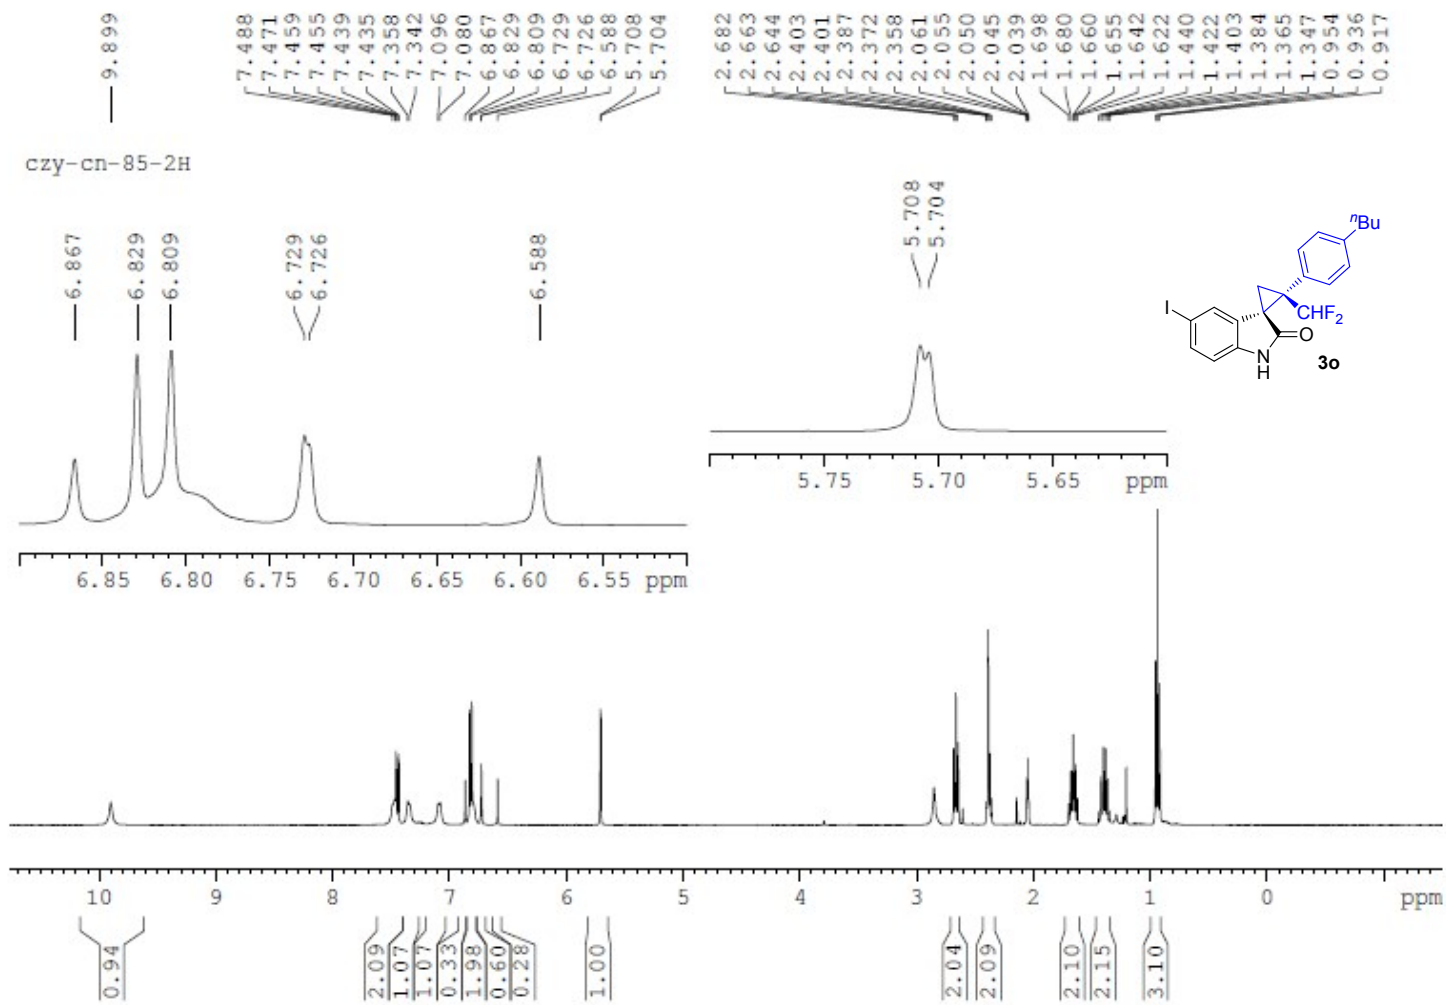

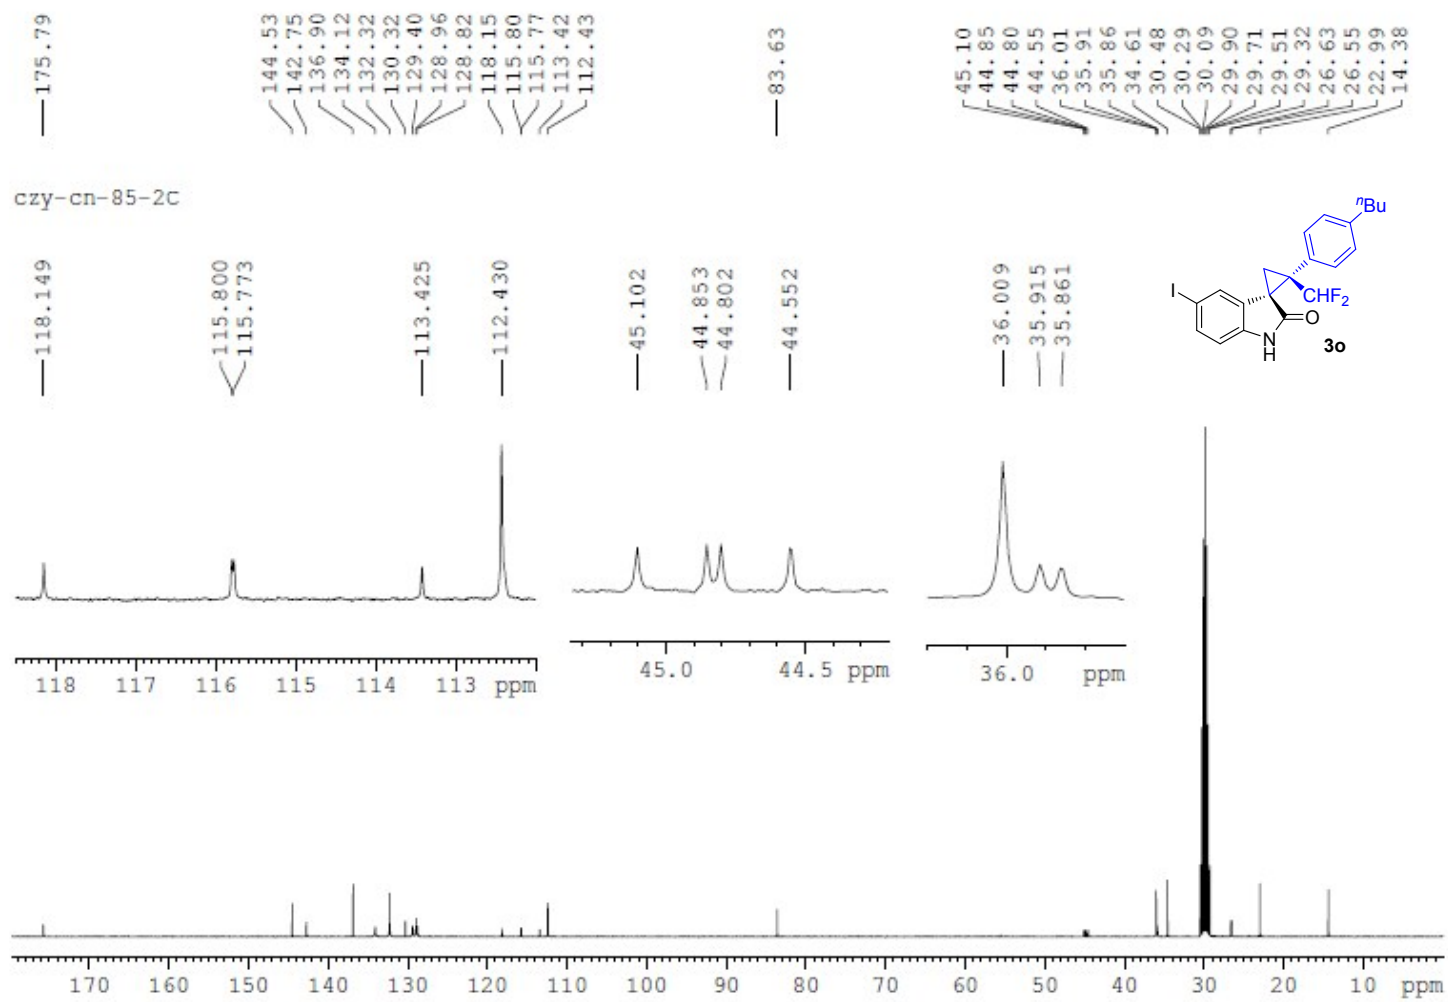

— -114.52  
— -115.28

— -121.07  
— -121.83

czy-cn-85-2+PhCF<sub>3</sub>

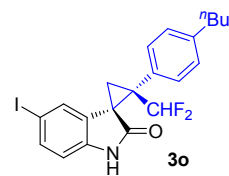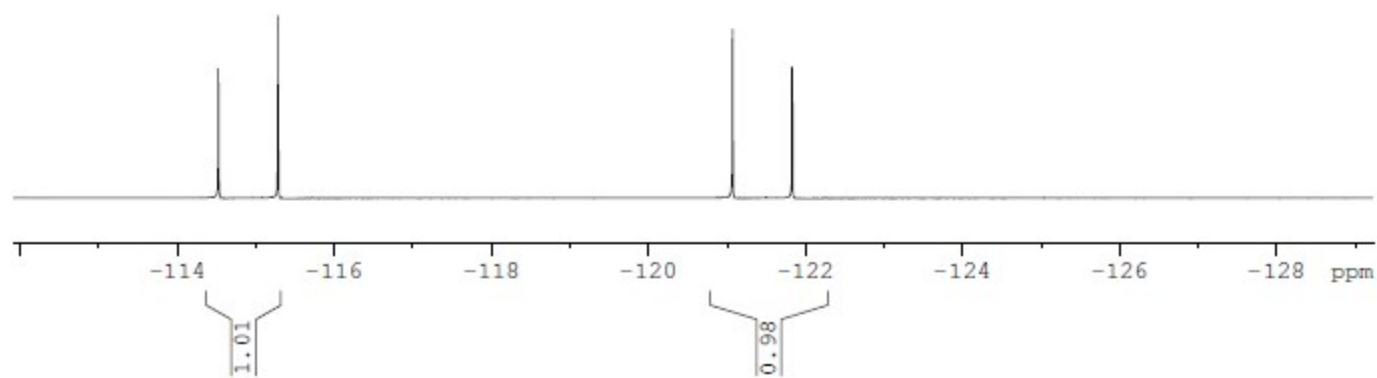

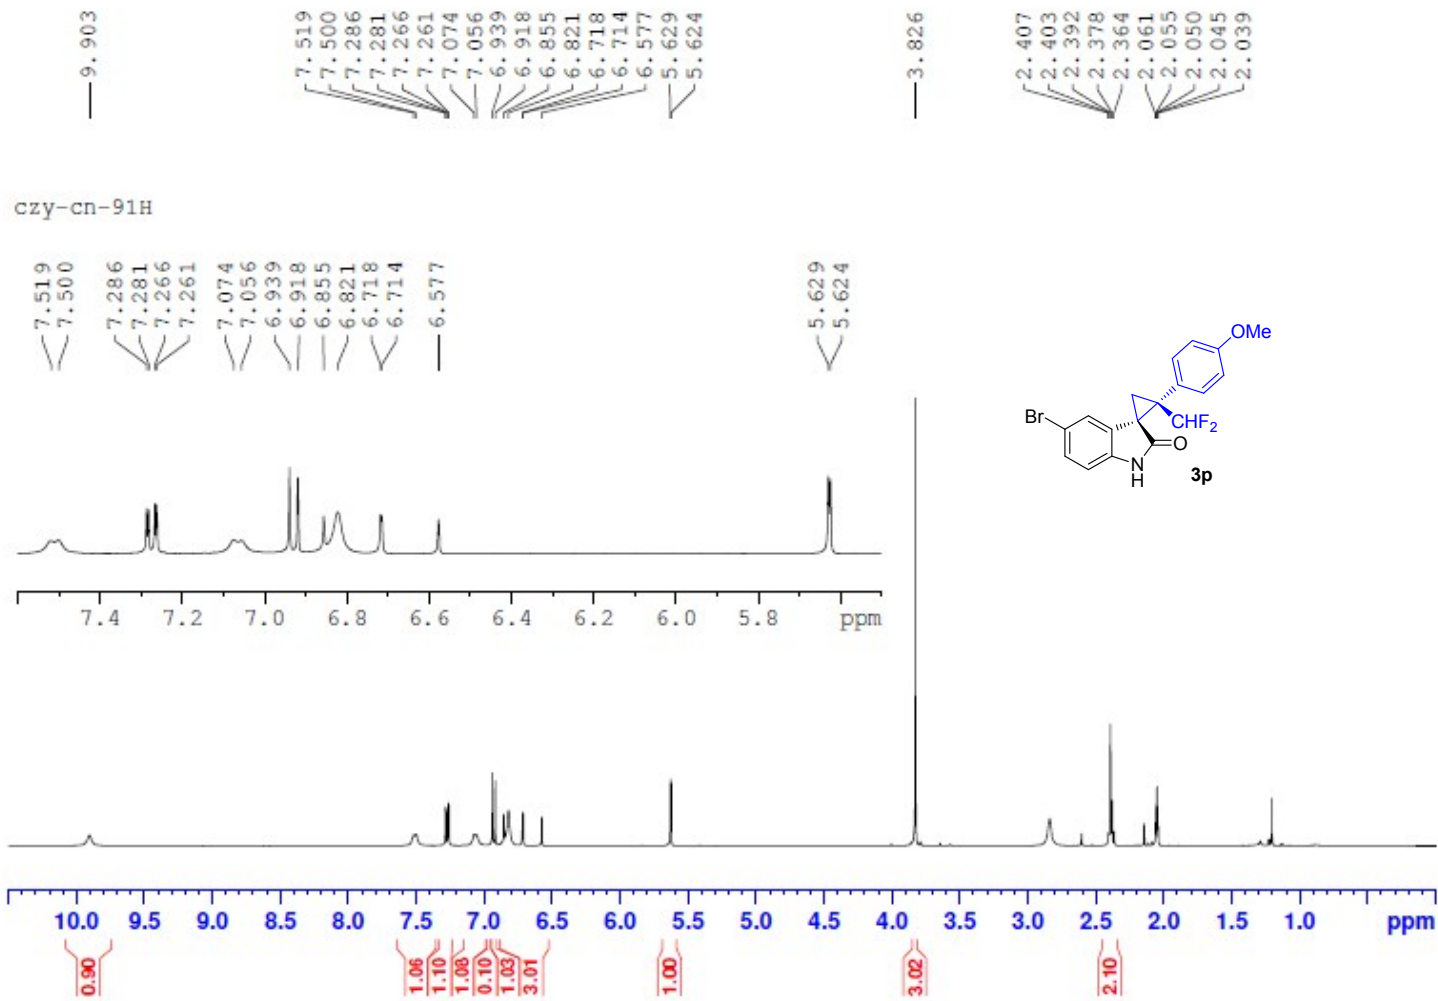

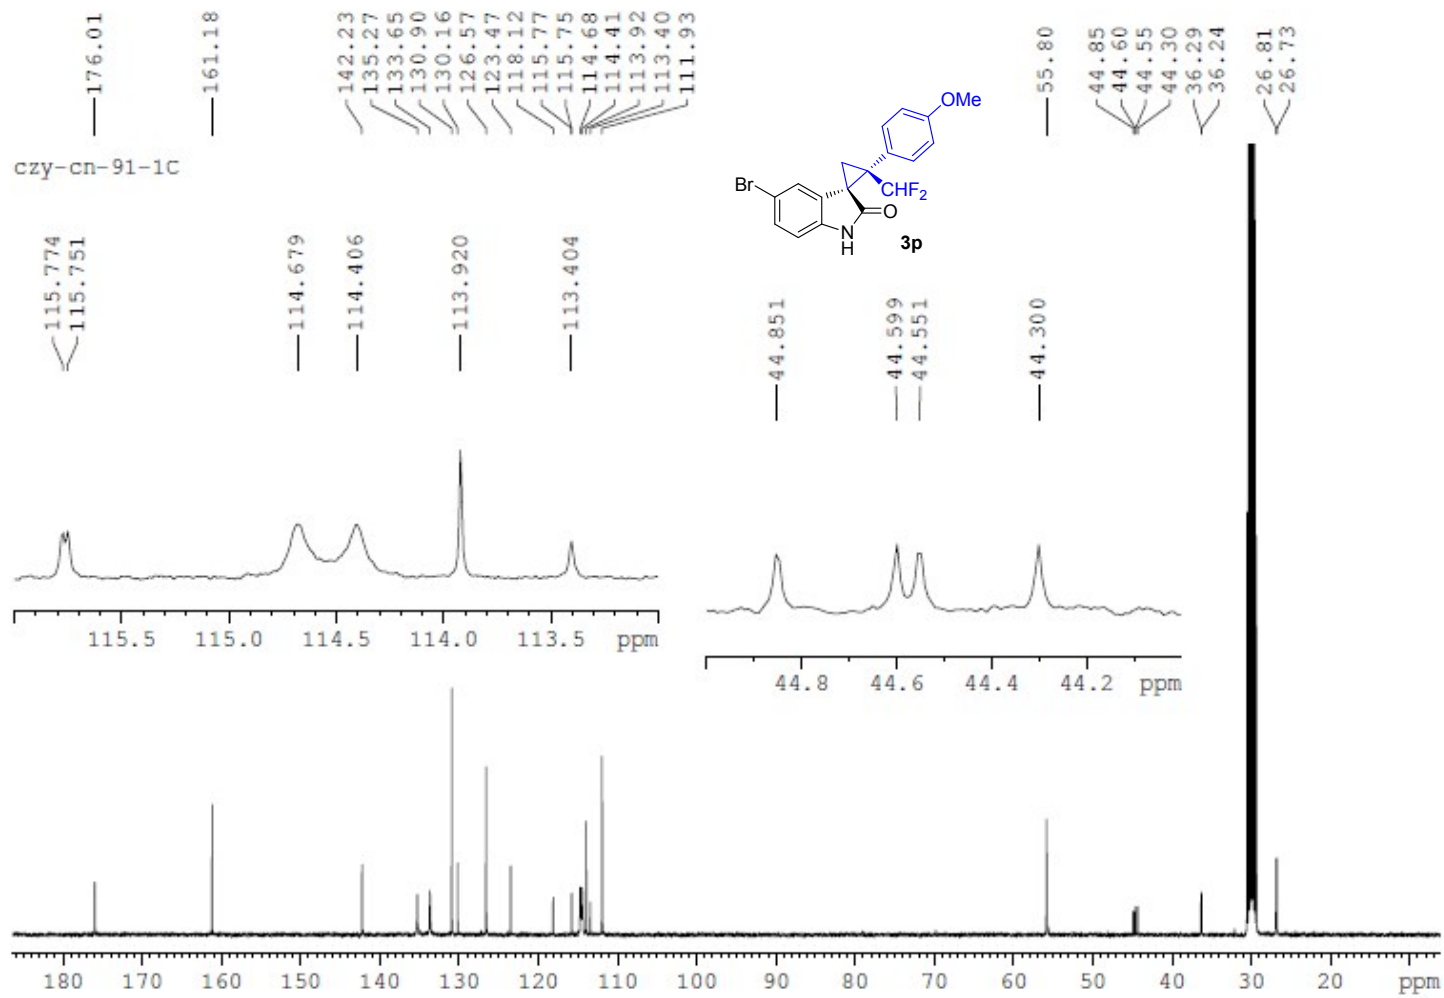



— -114.65

— -115.41

— -121.26

— -122.02

czy-cn-91+pHcf3

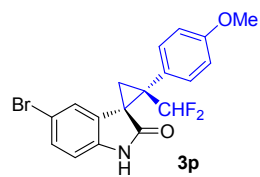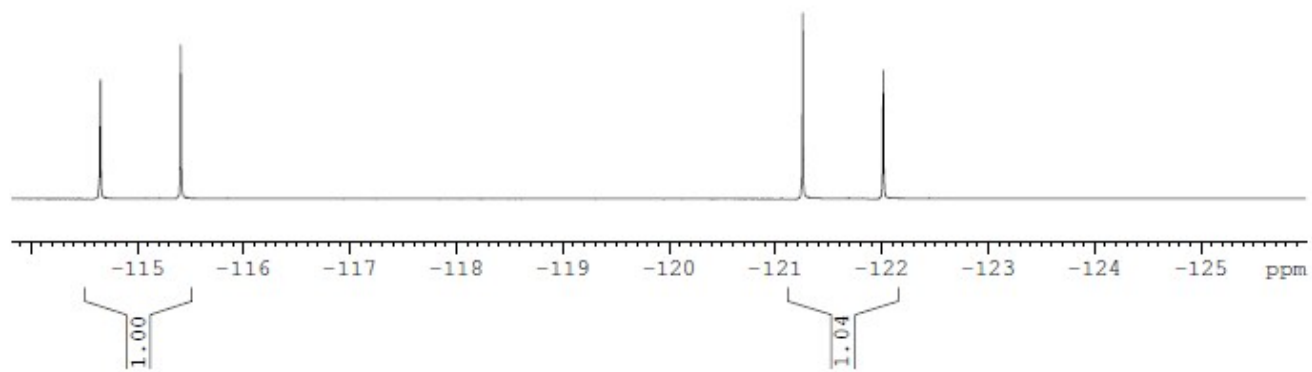

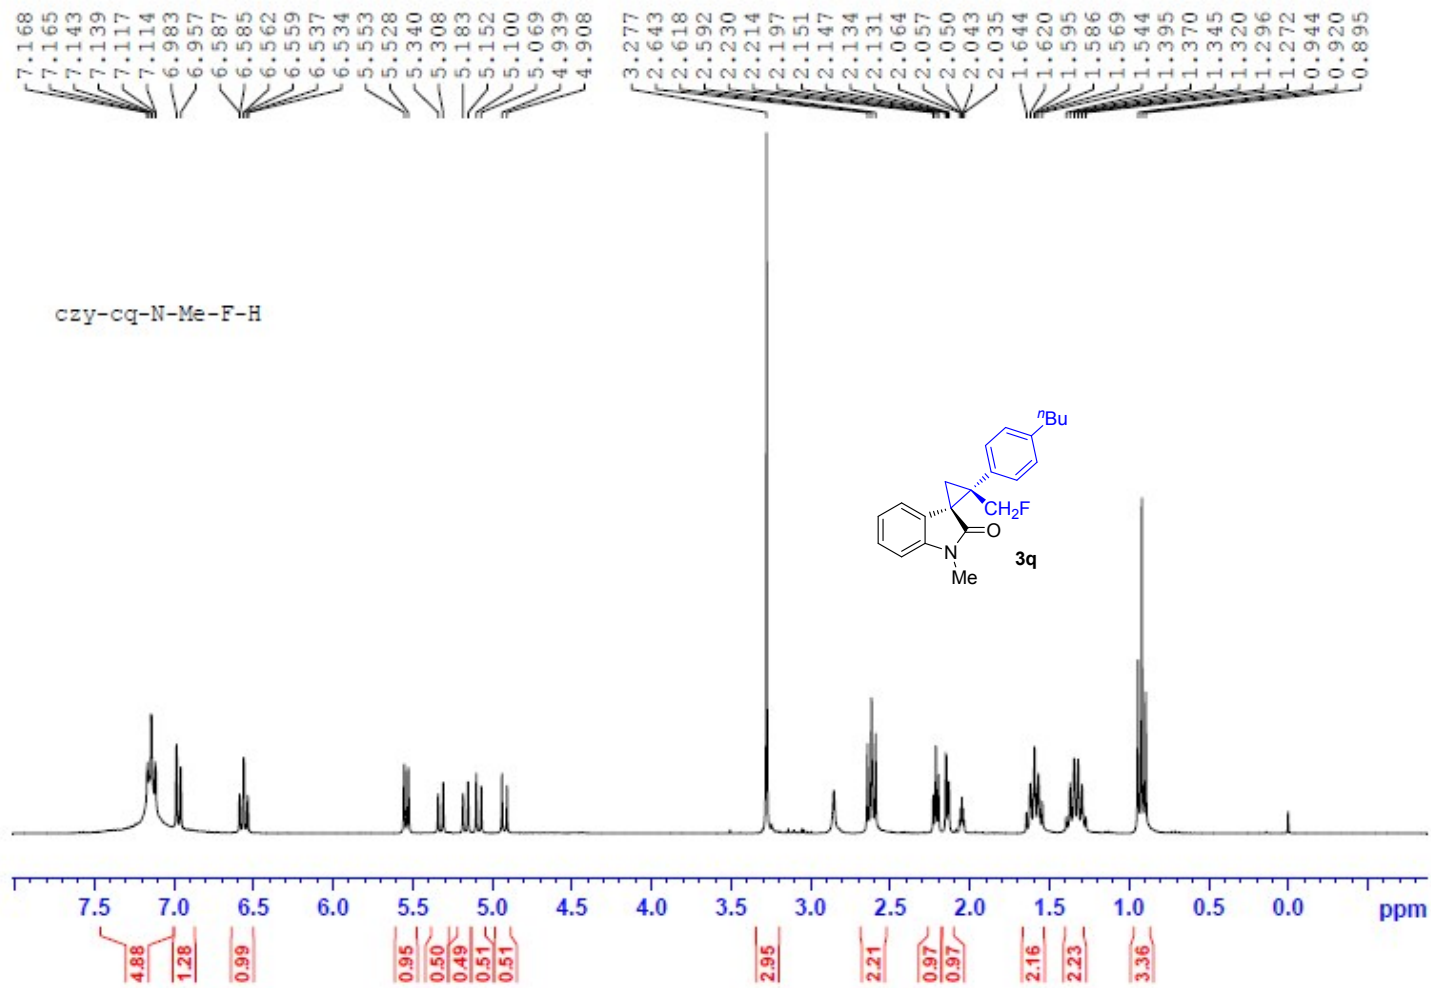

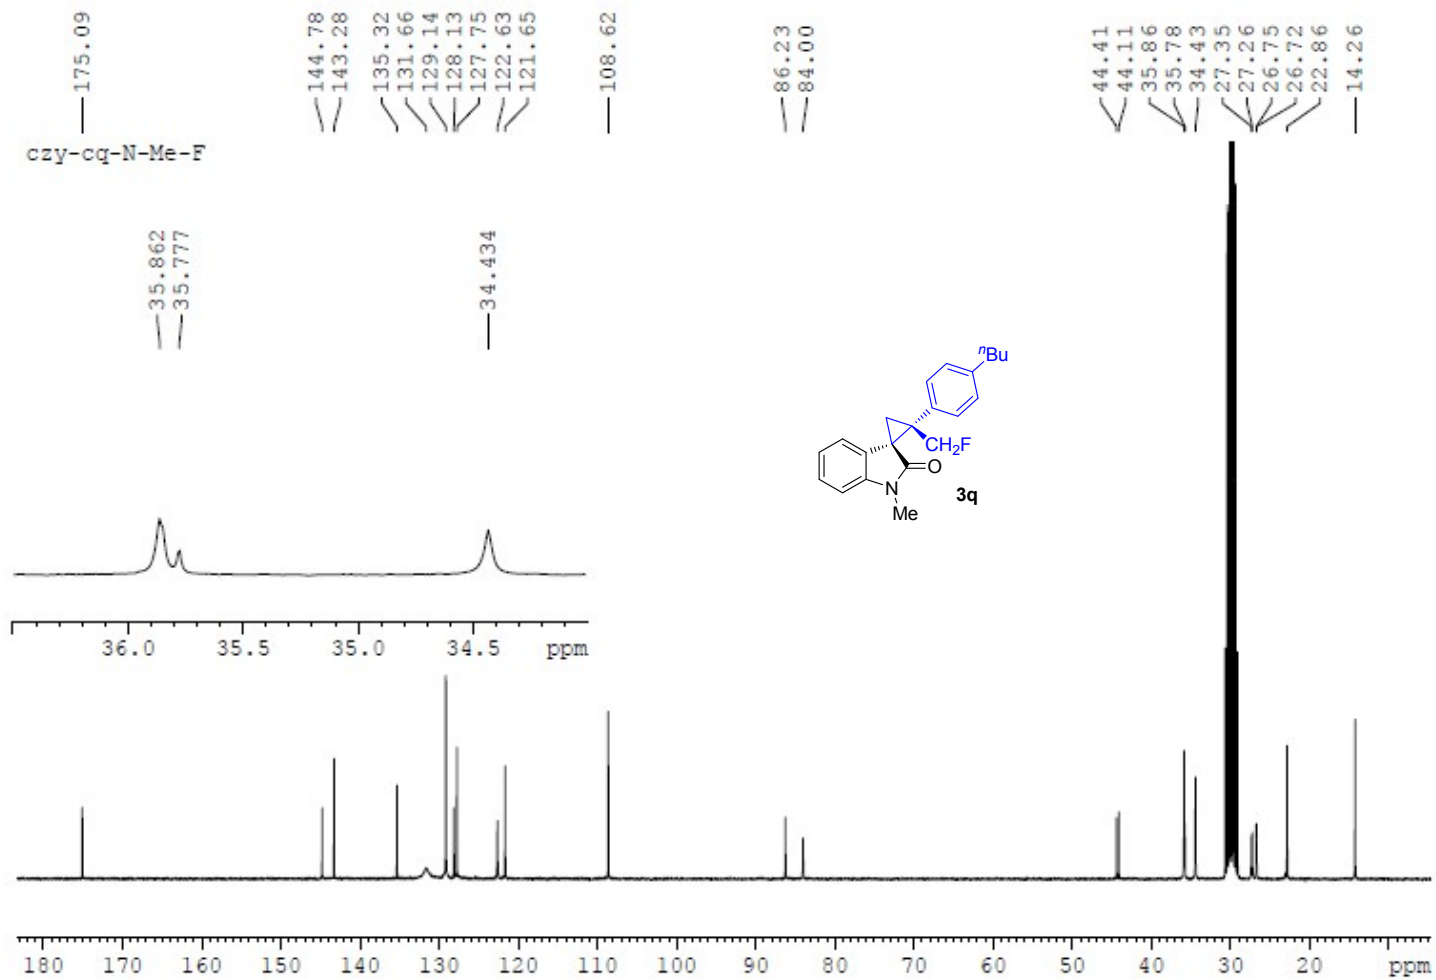

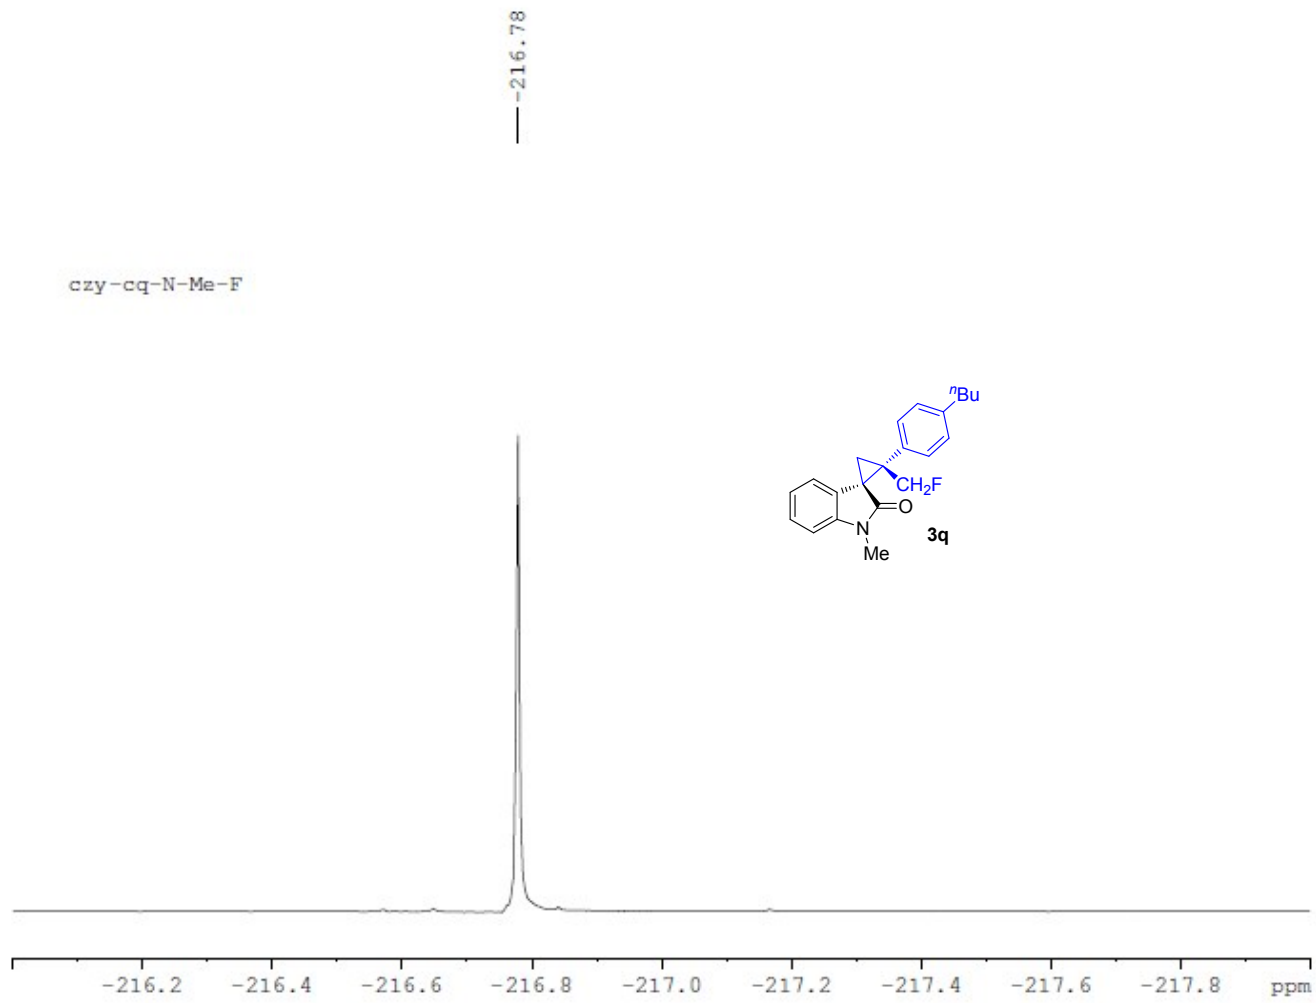

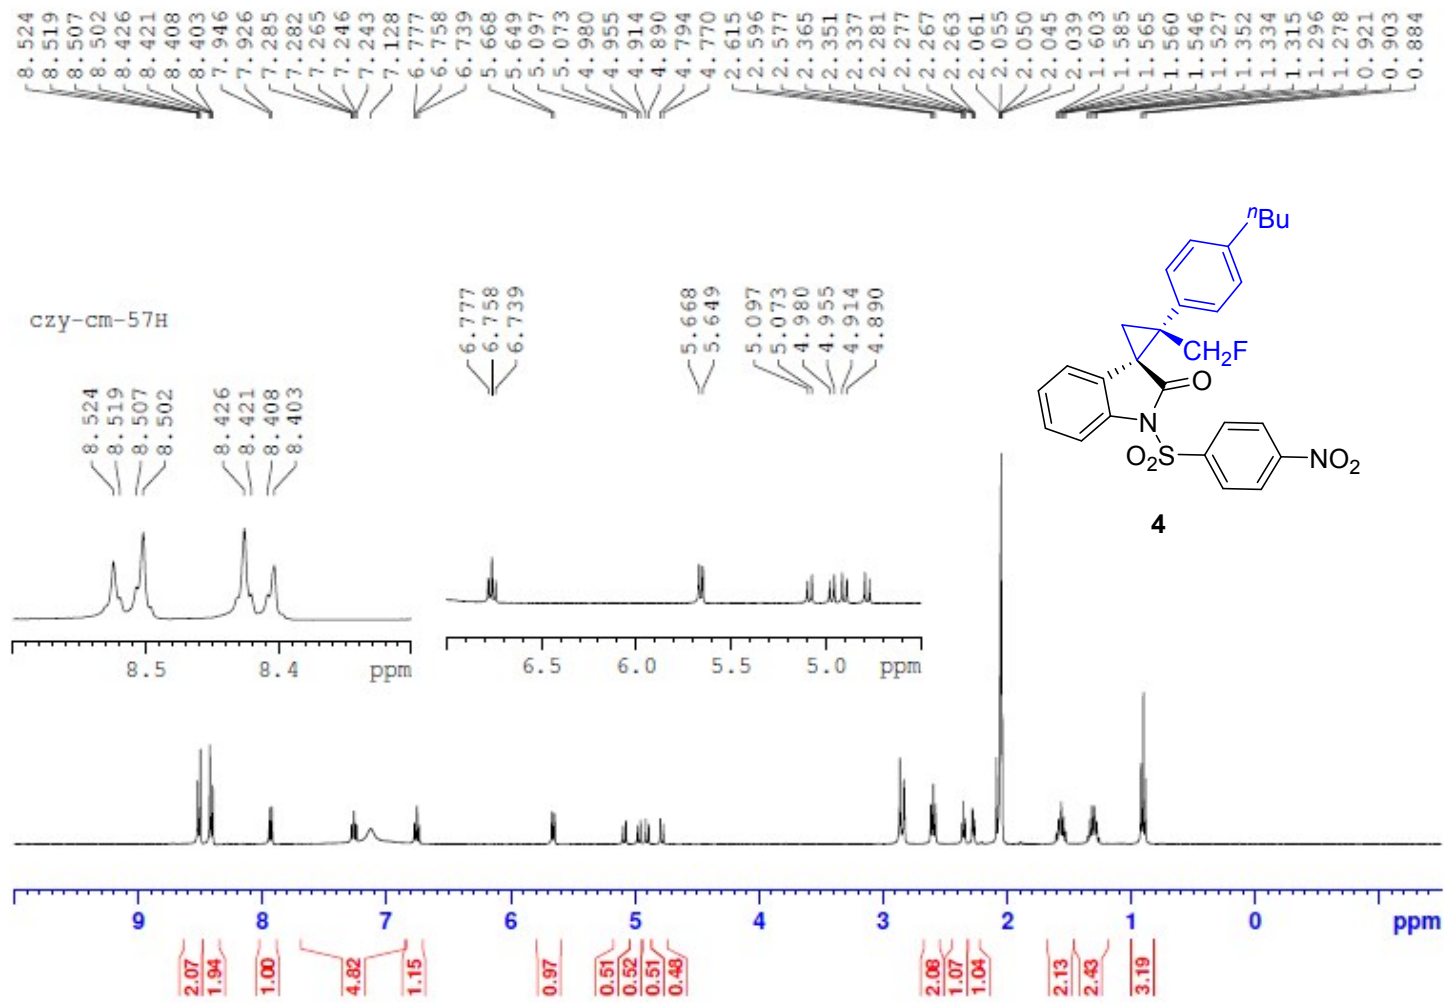

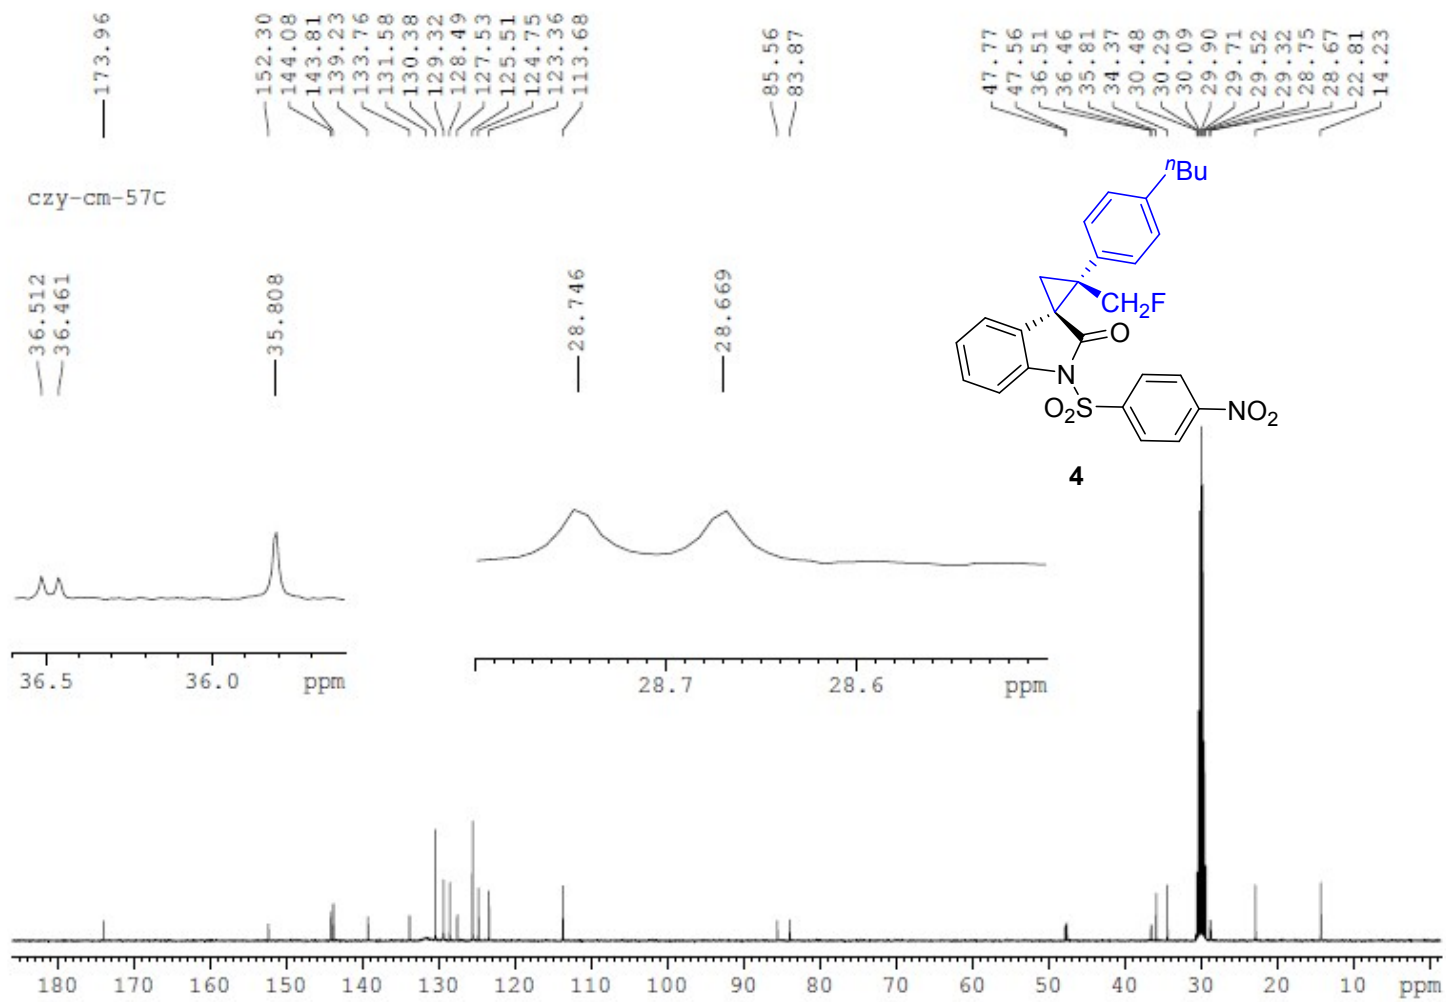

czy-cm-57F

-215.88

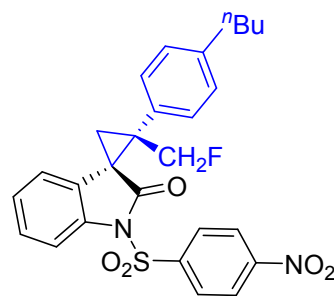

4

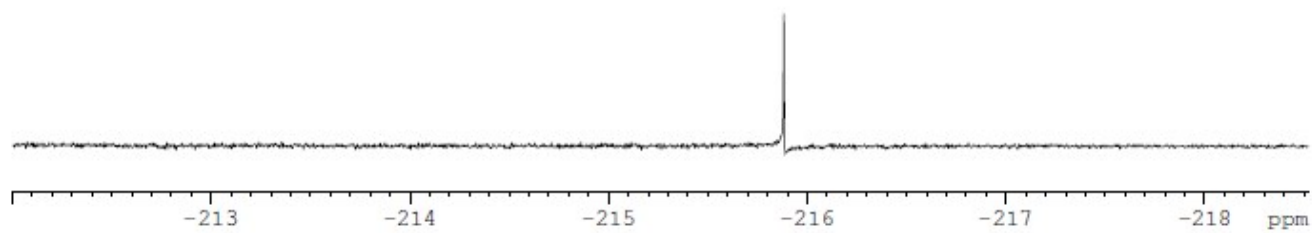

7.260  
7.091  
7.084  
7.079  
7.067  
7.062  
7.051  
7.030  
6.918  
6.898  
6.604  
6.596  
6.591  
6.580  
6.574

4.955  
4.930  
4.903  
4.835  
4.811  
4.783

3.697  
3.674  
2.482  
2.463  
2.444  
2.183  
2.180  
2.169  
2.166  
2.111  
2.095  
2.081  
1.517  
1.499  
1.480  
1.474  
1.461  
1.442  
1.277  
1.259  
1.240  
1.221  
1.203  
1.185  
0.883  
0.865  
0.846

czy-cn-105-2H

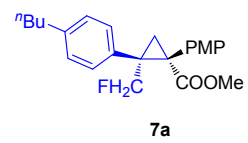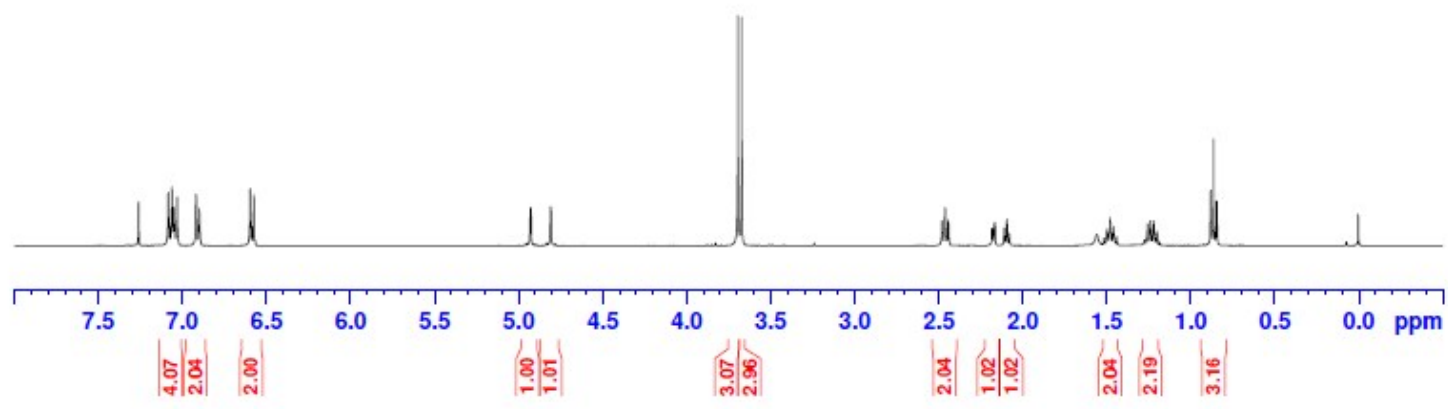



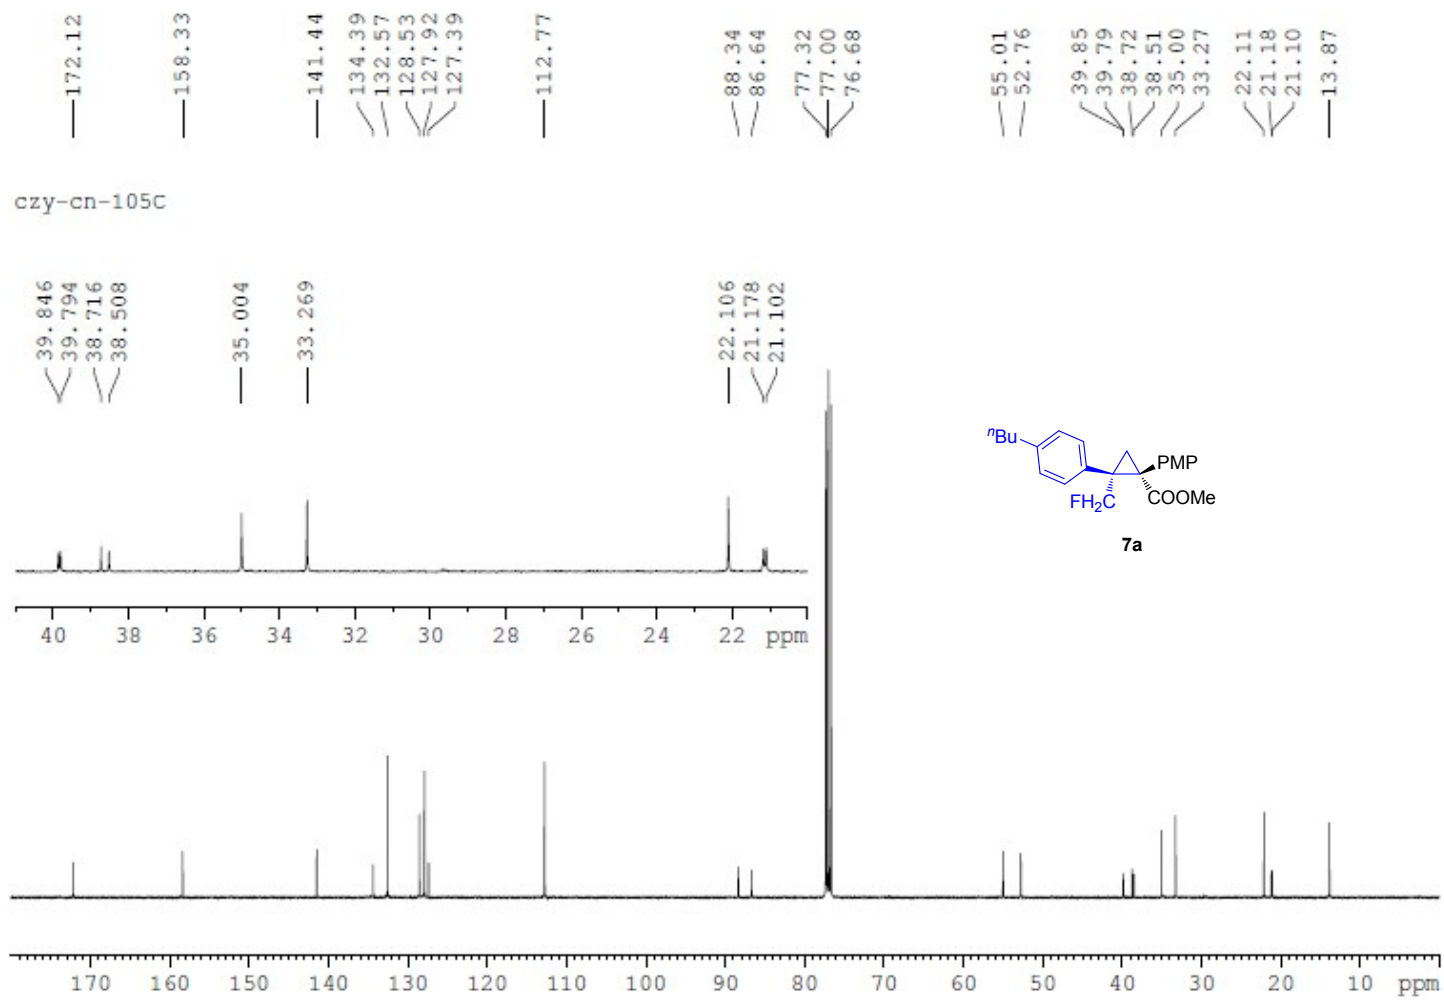

czy-cn-105-3F

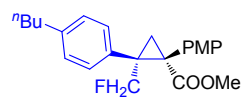

7a

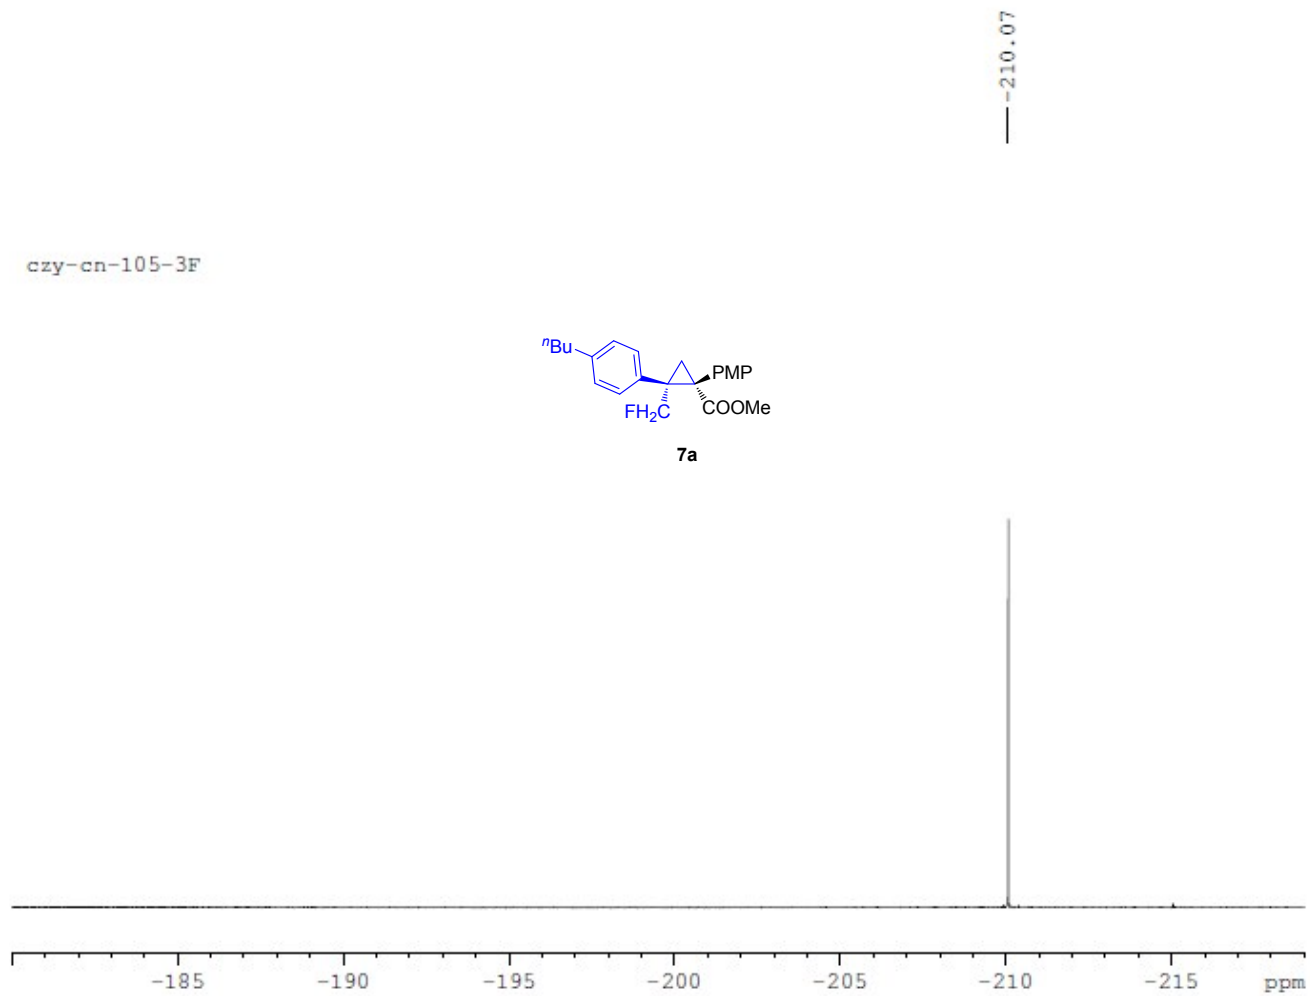

7.260  
7.183  
7.162  
7.036  
7.016  
6.928  
6.907

4.973  
4.949  
4.932  
4.907  
4.854  
4.829  
4.812  
4.788

3.700  
2.495  
2.476  
2.457  
2.221  
2.207  
2.132  
2.117  
2.102  
1.524  
1.506  
1.487  
1.468  
1.449  
1.288  
1.273  
1.258  
1.236  
1.217  
1.199  
1.181  
0.876  
0.858

czy-cn-110-1H

4.973  
4.949  
4.932  
4.907  
4.854  
4.829  
4.812  
4.788

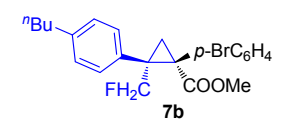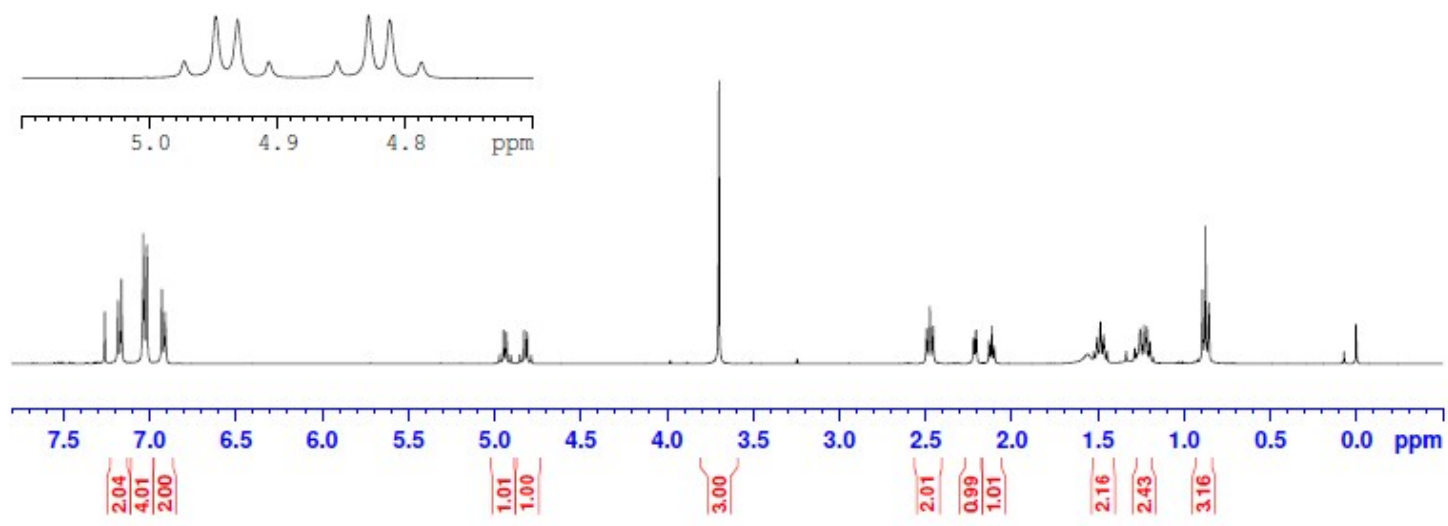

171.33

141.85  
134.52  
133.94  
133.23  
130.49  
128.41  
128.40  
128.13  
121.10

88.06  
86.36  
77.32  
77.00  
76.68

52.86  
39.87  
39.82  
38.98  
38.77  
34.99  
33.22  
22.06  
21.09  
21.01  
13.90

czy-cn-110-1c

39.869  
39.816

38.977  
38.768

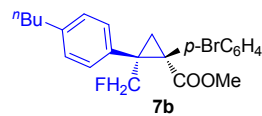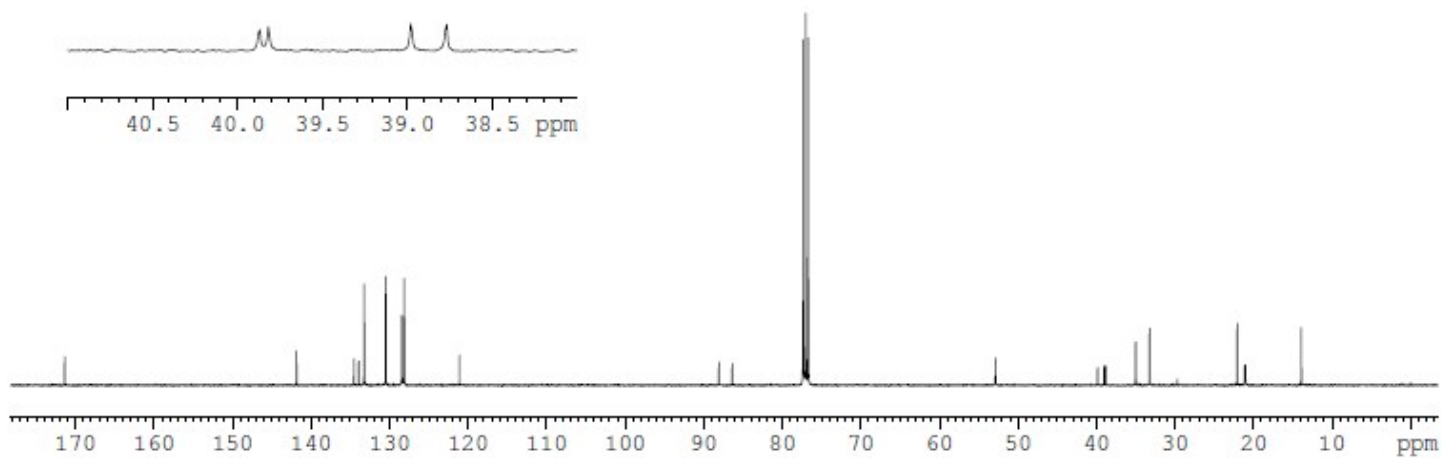

czy-cn-110-1F

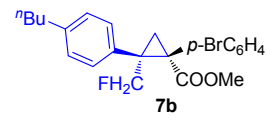

-210.06

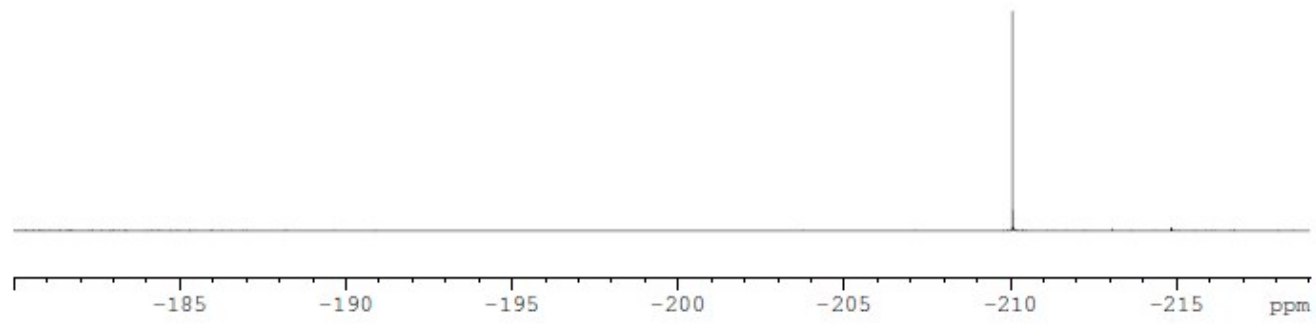

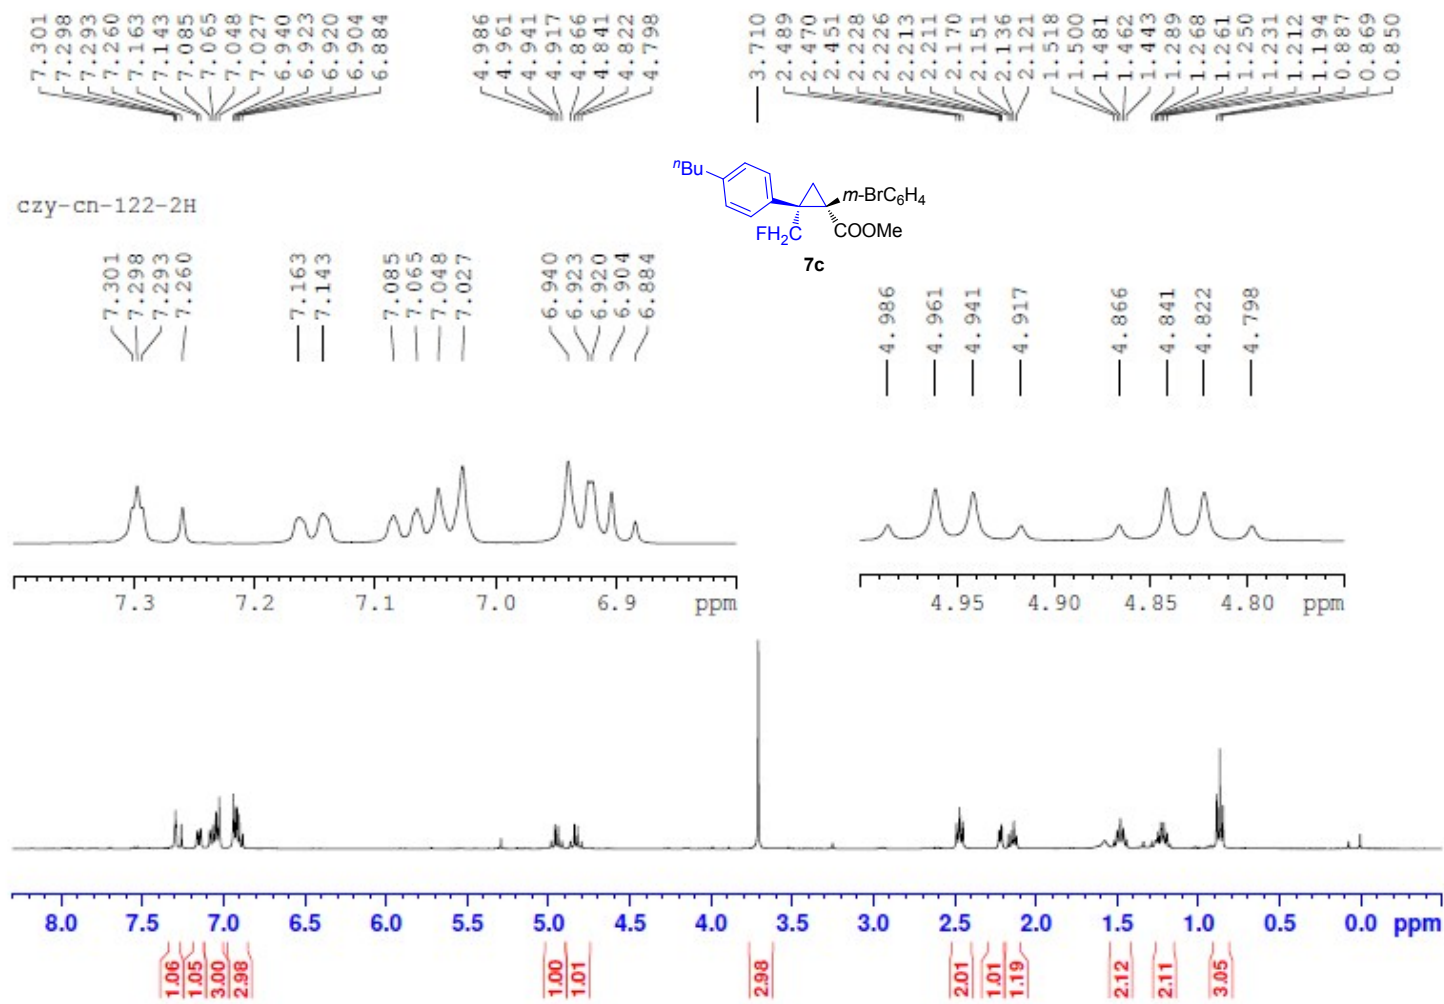

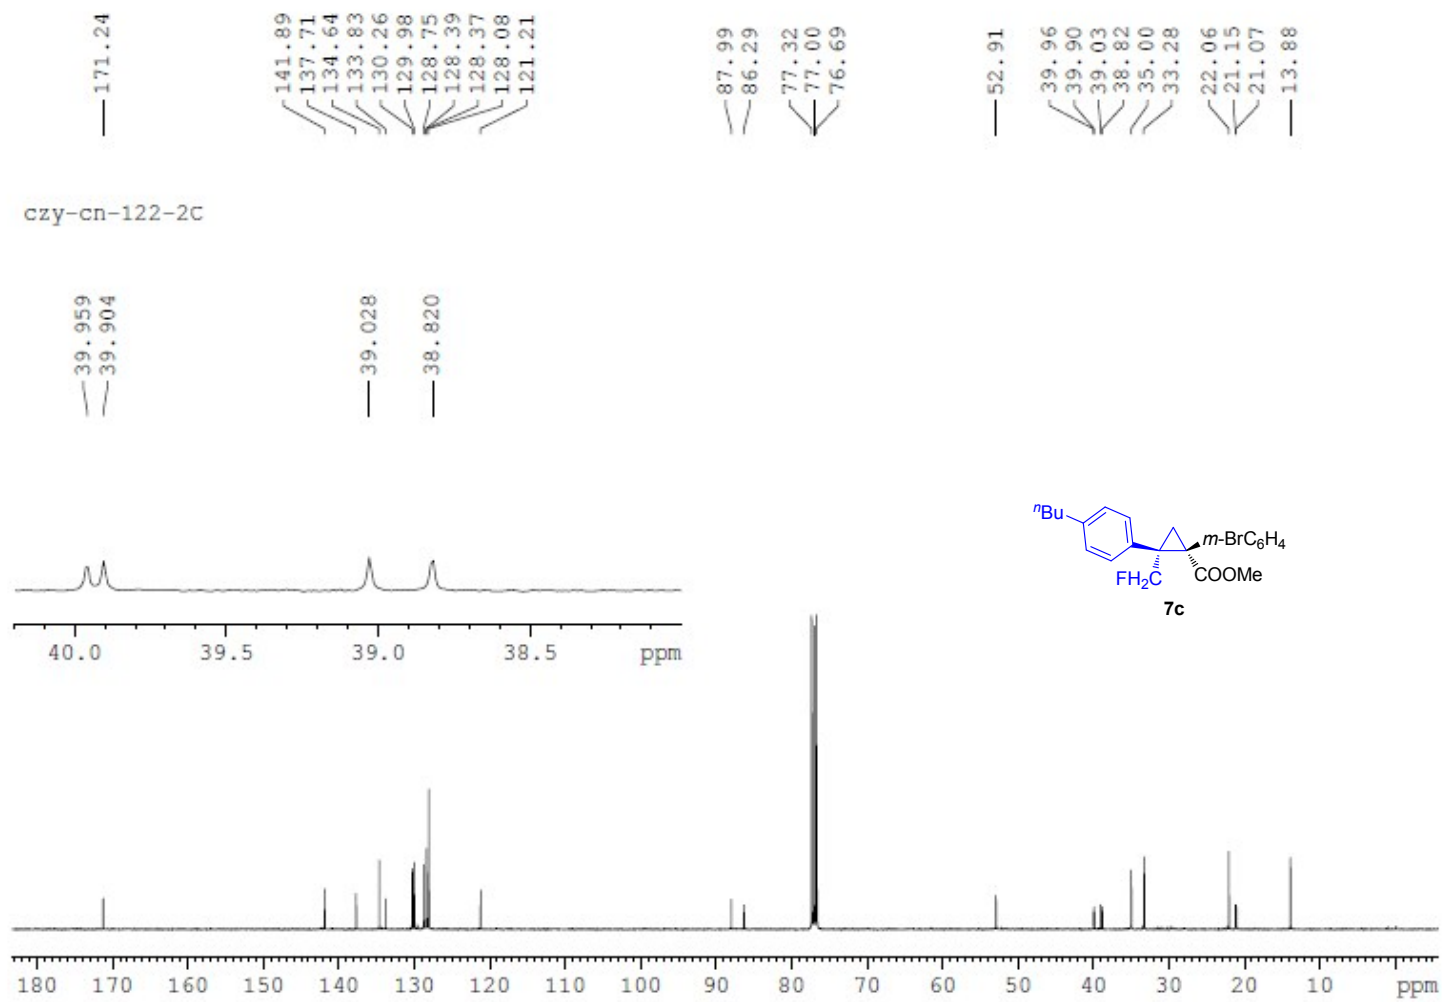

czy-cn-122-2F

-210.08

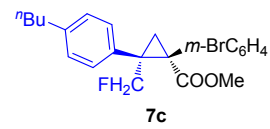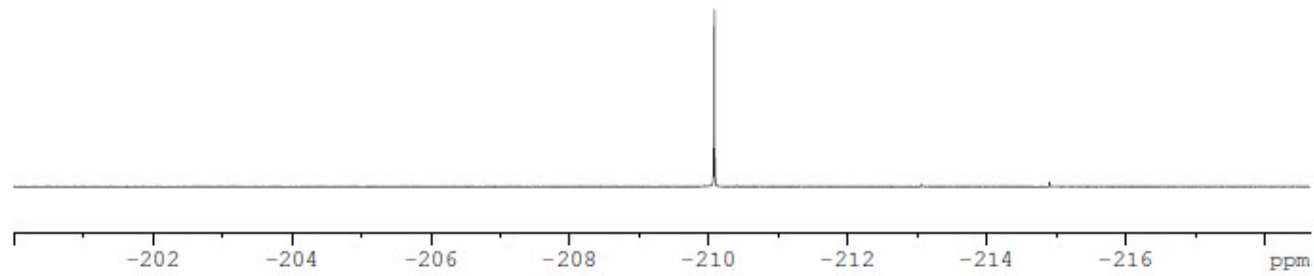



7.198  
7.177  
7.147  
7.130  
7.110  
7.093  
7.063  
7.042

4.978  
4.953  
4.947  
4.922  
4.858  
4.833  
4.828  
4.802

3.708

2.250  
2.235  
2.166  
2.151  
2.136

czy-cn-146H

4.978  
4.953  
4.947  
4.922

4.858  
4.833  
4.828  
4.802

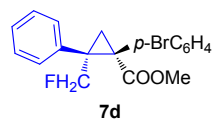

2.250  
2.235

2.166  
2.151  
2.136

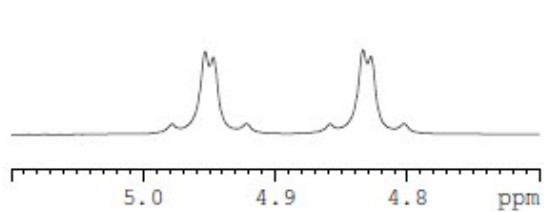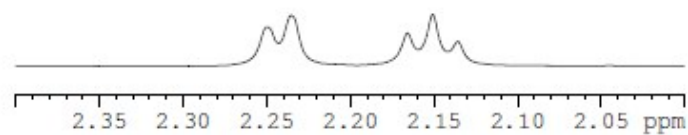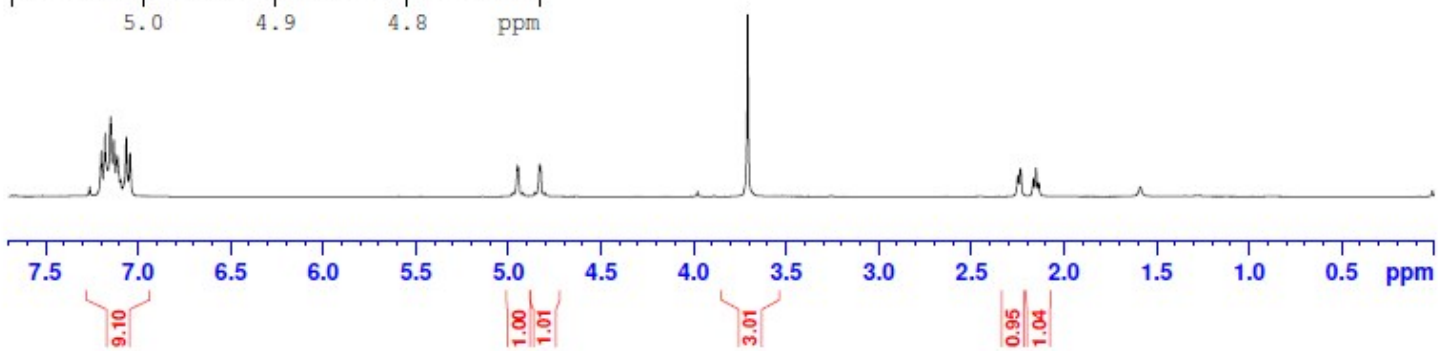

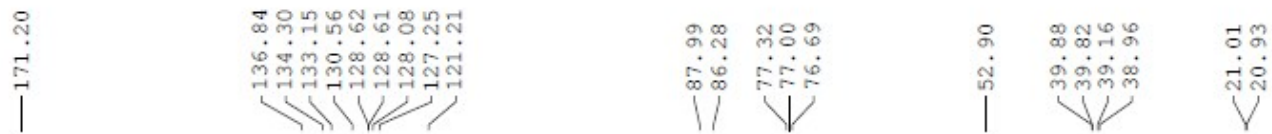

czy-cn-146C

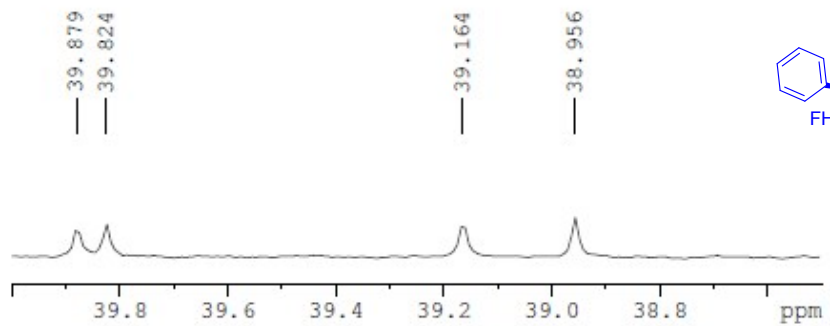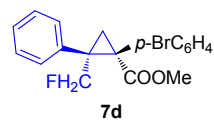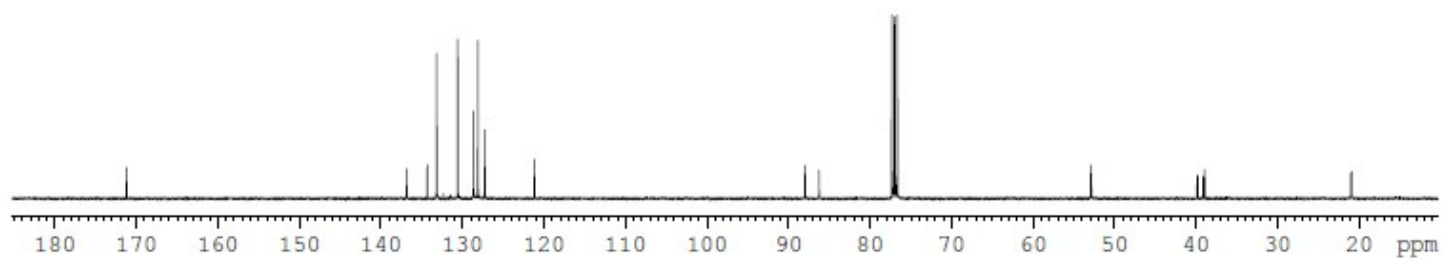

czy-cn-146F

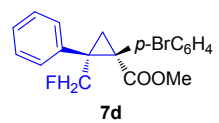

-210.14

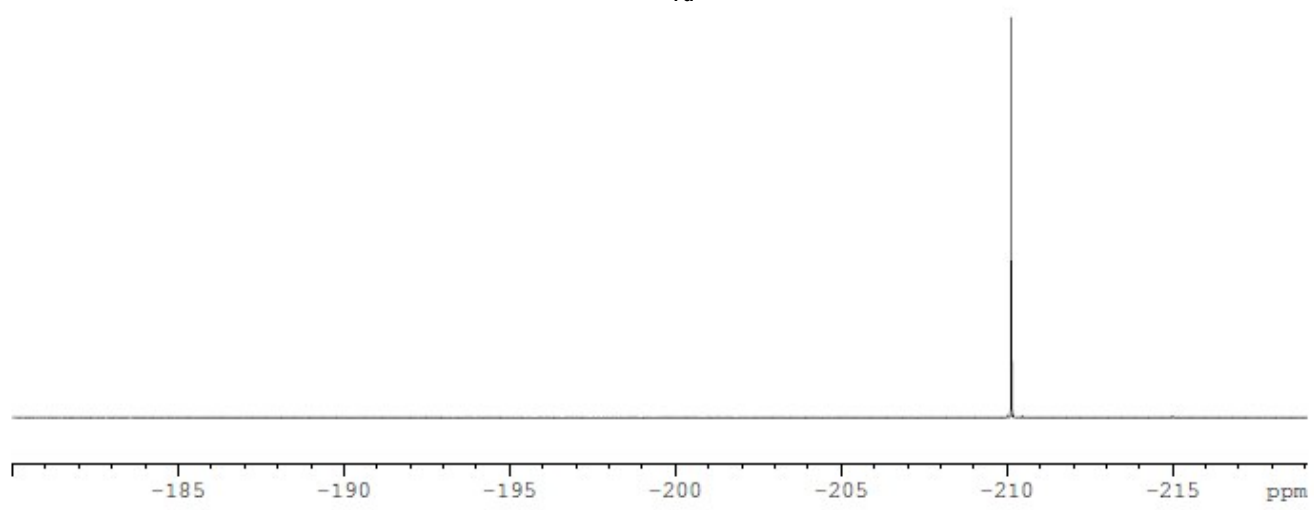

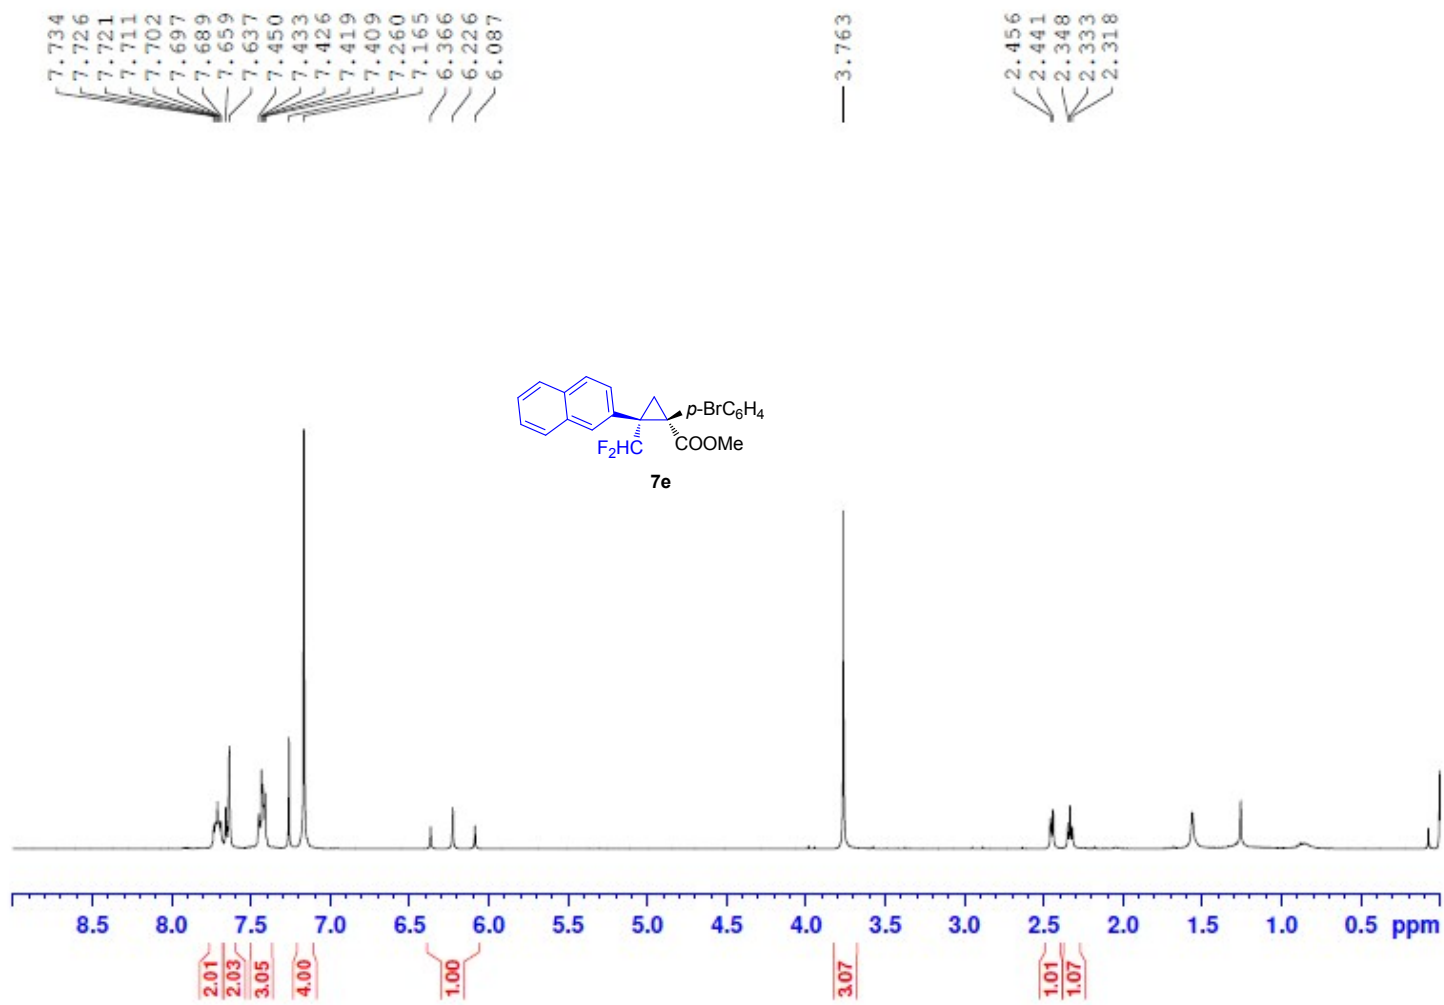

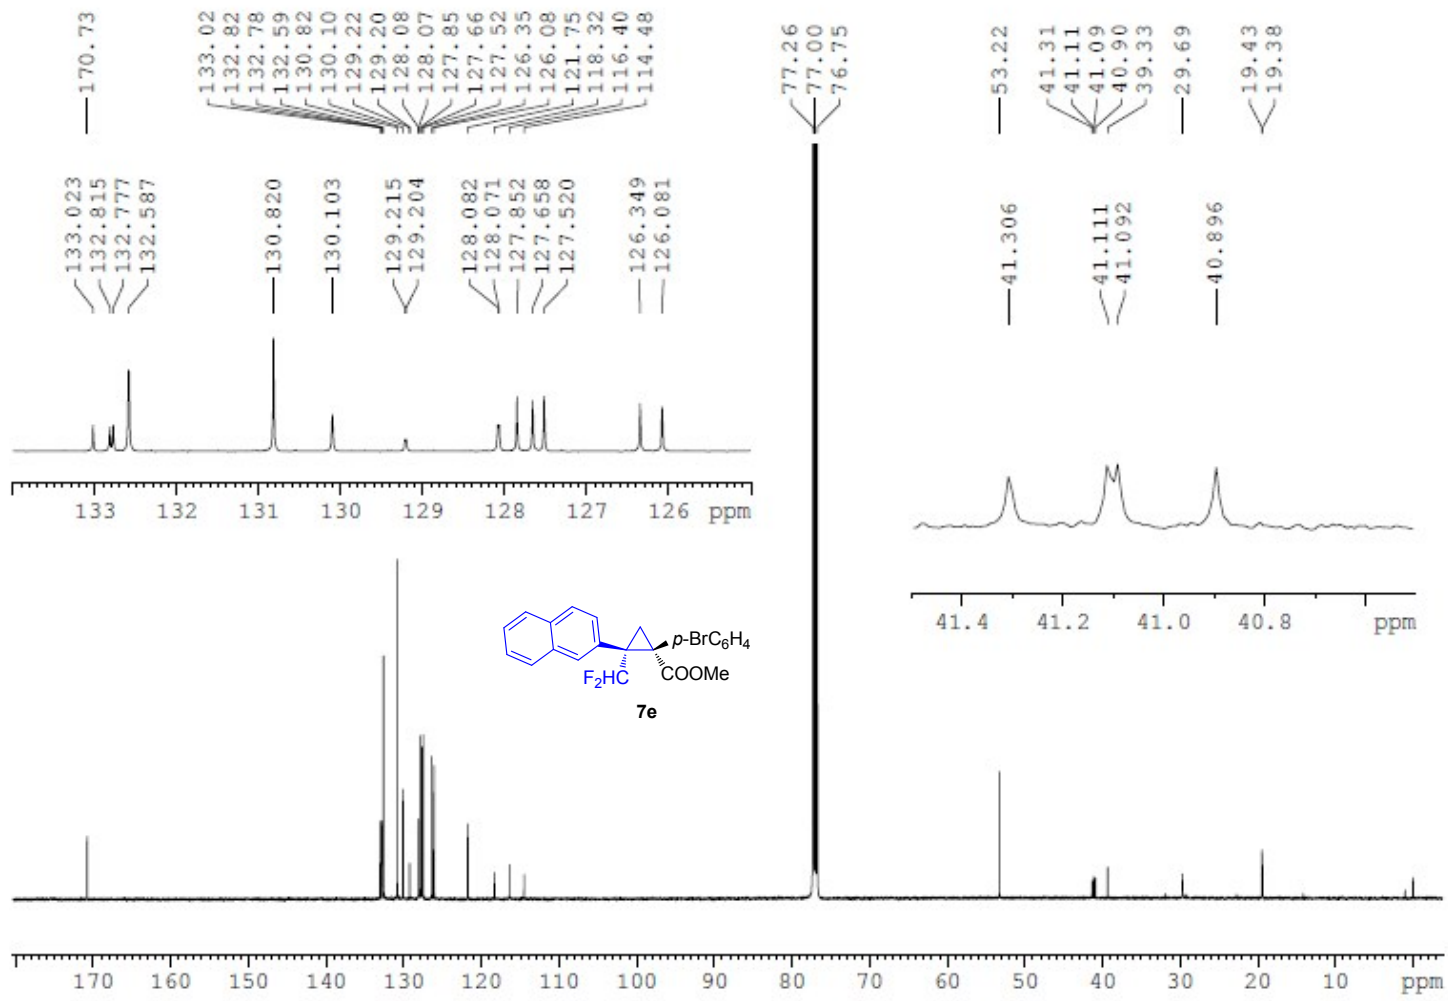

— -111.26  
— -112.02

— -117.31  
— -118.07

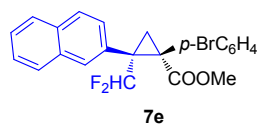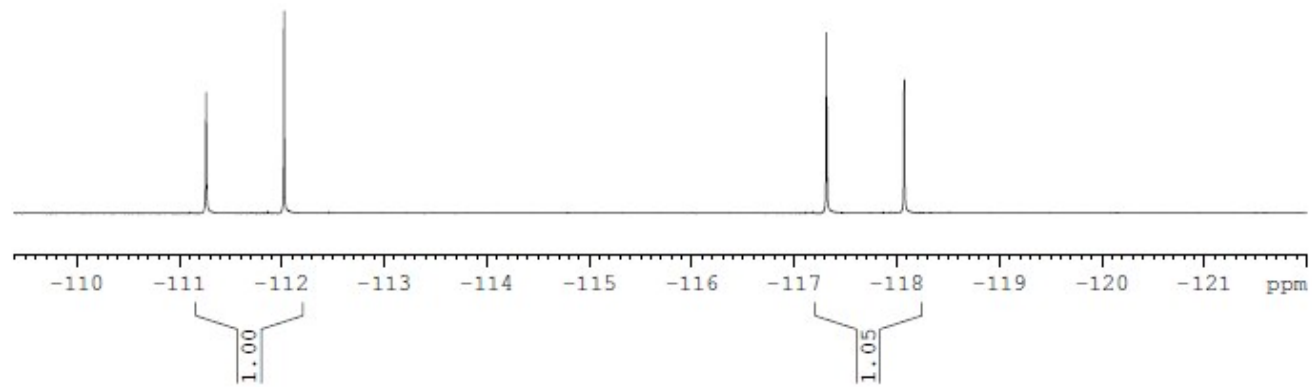

Supplement: c8qo00842f3.pdf [file c8qo00842f3.pdf]
