# Supplementary material for: Catalytic enantioselective synthesis of cyclopropanes featuring vicinal all-carbon quaternary stereocenters with a CH2F group; study of the influence of C–F⋯H–N interactions on reactivity
Source: Royal Society of Chemistry journal article supplement (doi:10.1039/c8qo00842f), 2018-01-01
Supplement: c8qo00842f2.pdf [file c8qo00842f2.pdf]

# Catalytic enantioselective synthesis of cyclopropanes featuring vicinal all-carbon quaternary stereocenters with a CH<sub>2</sub>F group; study of influence of C-F⋯H-N interactions on reactivity

Zhong-Yan Cao,<sup>‡a</sup> Wenmin Wang,<sup>‡b</sup> Kui Liao,<sup>a</sup> Xiaoming Wang,<sup>d</sup> Jian Zhou<sup>\*a,c,d</sup> and Jing Ma<sup>\*b</sup>

<sup>a</sup>Shanghai Key Laboratory of Green Chemistry and Chemical Process, East China Normal University, 3663N Zhongshan Road, Shanghai 200062, P. R. China. E-mail: [jzhou@chem.ecnu.edu.cn](mailto:jzhou@chem.ecnu.edu.cn).

<sup>b</sup>Institute of Theoretical and Computational Chemistry, School of Chemistry and Chemical Engineering, Nanjing University, Nanjing 210023, P R China. E-mail: [majing@nju.edu.cn](mailto:majing@nju.edu.cn).

<sup>c</sup>Shanghai Engineering Research Center of Molecular Therapeutics and New Drug Development, East China Normal University, 3663N Zhongshan Road, Shanghai 200062, P. R. China.

<sup>d</sup>State Key Laboratory of Organometallic Chemistry, Shanghai Institute of Organic Chemistry, Chinese Academy of Sciences, Shanghai 200032, P R China.

<sup>‡</sup>*These authors contributed equally to this article.*

## Supporting Information (Part A)

| Contents                                                                                                                                                    | Page    |
|-------------------------------------------------------------------------------------------------------------------------------------------------------------|---------|
| General information                                                                                                                                         | 2       |
| Part I Condition optimization for Au(I) catalyzed asymmetric cyclopropanation of diazooxindole <b>1a</b> with <b>2a</b>                                     | 3-6     |
| Part II General procedure for Au(I) catalyzed stereoselective cyclopropanation of diazooxindoles <b>1</b> and experimental data for products <b>3</b>       | 7-16    |
| Part III General procedure for Rh(II) catalyzed stereoselective cyclopropanation of aryl diazoacetates <b>5</b> and experimental data for products <b>7</b> | 16-19   |
| Part IV Synthesis of product <b>4</b>                                                                                                                       | 19      |
| Part V Determining the solubility of <b>1a</b> in PhF and PhCl                                                                                              | 20      |
| Part VI Results of DFT calculations and discussion                                                                                                          | 21-118  |
| Part VII Single-Crystal X-ray Crystallography of <b>4</b>                                                                                                   | 119-129 |
| Part VIII Single-Crystal X-ray Crystallography of <b>7d</b>                                                                                                 | 130-142 |

**NMR spectra are provided in Part B**

**HPLC spectra are provided in Part C**

**General:** Reactions were monitored by thin layer chromatography using UV light to visualize the course of reaction. Purification of reaction products were carried out by flash chromatography on silica gel. Chemical yields refer to pure isolated substances. The  $[\alpha]_D$  was recorded using PolAAr 3005 High Accuracy Polarimeter. Infrared (IR) spectra were obtained using a Bruker tensor 27 infrared spectrometer.  $^1\text{H}$ ,  $^{13}\text{C}$ ,  $^{19}\text{F}$  NMR spectra were obtained using a Bruker DPX-400 spectrometer. Chemical shifts of  $^1\text{H}$  NMR and  $^{13}\text{C}$  NMR spectra are reported in ppm from tetramethylsilane with the solvent resonance as the internal standard while  $\text{PhCF}_3$  ( $\delta$ : -63.2 ppm) was used as external standard for  $^{19}\text{F}$  NMR spectra. The following abbreviations were used to designate chemical shift multiplicities: s = singlet, d = doublet, t = triplet, q = quartet, m = multiplet, br = broad.

All reactions were run in an atmosphere of  $\text{N}_2$  except noted. Toluene was prepared by distillation over sodium-benzophenone ketyl prior to use. Anhydrous  $\text{CH}_2\text{Cl}_2$  was prepared by first distillation over  $\text{P}_2\text{O}_5$  and then from  $\text{CaH}_2$ . Fluorobenzene was prepared by first dried in  $\text{P}_2\text{O}_5$  and then distillation under  $\text{N}_2$  atmosphere.  $\alpha$ ,  $\alpha$ ,  $\alpha$ -Trifluorotoluene was purified by treatment with boiling aqueous  $\text{Na}_2\text{CO}_3$  several times, dried with  $\text{K}_2\text{CO}_3$ , then with  $\text{P}_2\text{O}_5$ , and fractionally distilled. 1,4-Difluorobenzene was prepared by first dried in  $\text{P}_2\text{O}_5$  and then distillation under  $\text{N}_2$  atmosphere.  $\text{AgOTf}$  was purchased from TCI Company.  $\text{AgBF}_4$  and  $\text{Rh}_2(\text{R-DOSP})_4$  were purchased from Strem Chemicals.  $\text{AgPF}_6$ ,  $\text{NaBAR}^{\text{F}}_4$  and  $\text{AgSbF}_6$  were purchased from Alfa-Aesar Company. 3-Diazooxindoles were synthesized according to literature procedures.<sup>1</sup> Chiral spiro bisphosphine Ligands **L1-L6** were synthesized according to the literature method.<sup>2</sup> Alkenes **2a-2i** were synthesized according to the literature methods.<sup>3</sup>

---

(1) Augusti, R.; Kascheres, C. *J. Org. Chem.* **1993**, *58*, 7079-7083.

(2) (a) Wang, X.-M.; Han, Z.-B.; Wang, Z.; Ding, K.-L. *Angew. Chem.Int. Ed.* **2012**, *51*, 936-940. (b) Wang, X.-M.; Meng, F.-Y.; Wang, Y.; Han, Z.-B.; Chen, Y.-J.; Liu, L.; Wang, Z.; Ding, K.-L. *Angew. Chem.Int. Ed.* **2012**, *51*, 9276-9282.

(3) (a) Walkowiak, J.; del Campo, T. M.; Ameduri, B.; Gouverneur, V. *Synthesis* **2010**, *11*, 1883-1890. (b) Miura, T.; Ito, Y.; Murakami, M. *Chem. Lett.* **2008**, *37*, 1006-1007.

**Part I: Condition optimization for Au(I) catalyzed asymmetric cyclopropanation of diazooxindole **1a** with **2a****

**Table S1.** Ligand Screen for Au(I) Catalyzed Cyclopropanation of **1a** and **2a**

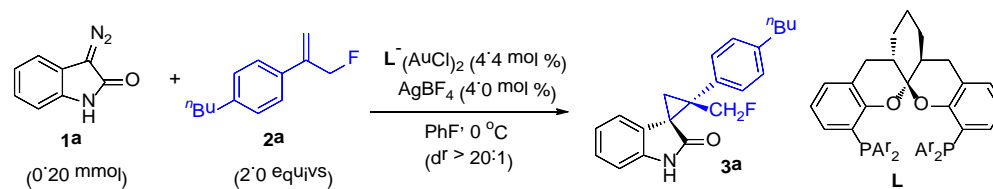

| Entry <sup>a</sup> | Ar                                                           | Time (h) | Isolated yield (%) | Ee (%) <sup>b</sup> |
|--------------------|--------------------------------------------------------------|----------|--------------------|---------------------|
| 1                  | <b>L1:</b> Ph                                                | 0.3      | 58                 | 90                  |
| 2                  | <b>L2:</b> <i>o</i> -MeC <sub>6</sub> H <sub>4</sub>         | 25       | 31                 | 69                  |
| 3                  | <b>L3:</b> <i>p</i> -MeOC <sub>6</sub> H <sub>4</sub>        | 0.3      | 60                 | 88                  |
| 4                  | <b>L4:</b> <i>p</i> -MeC <sub>6</sub> H <sub>4</sub>         | 3.0      | 44                 | 90                  |
| 5                  | <b>L5:</b> <i>p</i> -FC <sub>6</sub> H <sub>4</sub>          | 0.3      | 57                 | 90                  |
| 6                  | <b>L6:</b> 3,5-Me <sub>2</sub> C <sub>6</sub> H <sub>3</sub> | 1.3      | 33                 | 88                  |

<sup>a</sup>Determined by crude <sup>1</sup>H NMR; <sup>b</sup>Determined by chiral HPLC analysis.

We commenced our study first by using the optimal condition established in our previous work,<sup>4</sup> with diazooxindole **1a** and  $\alpha$ -CH<sub>2</sub>F styrene **2a** as substrate. As shown in Table S1, for ligands bearing different steric and electronic properties, although employing ligands **L1**, **L4** and **L5** can give the same level of enantioselectivity (90%) (entries 1, 4 and 5), we decided to choose **L1** as the best ligand for other condition screen due to its little higher yield and easier availability.

(4) Cao, Z.-Y.; Wang, X.-M.; Tan, C.; Zhao, X.-L.; Zhou, J.; Ding, K.-L. *J. Am. Chem. Soc.*, **2013**, *135*, 8197-8200.

Giving that counteranion of the catalyst often plays a very important role in asymmetric gold catalysis,<sup>5</sup> we continued the study by screening various different silver salts. It's very interesting to note that, of nine different anions we screened; only four of them enabled the reaction to work well (entries 1-4, Table S2). Considering the use of AgOTf was able to induce the best ee, we decided to choose it as the best silver salt for further solvent screen.

**Table S2.** Counteranion screen

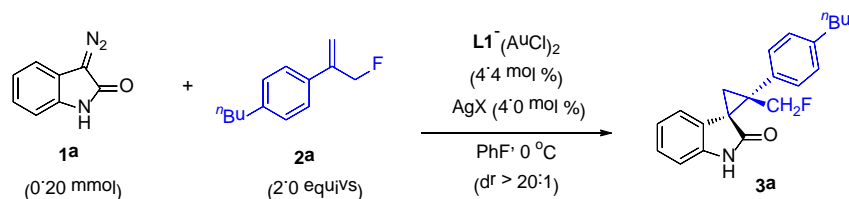

| Entry <sup>a</sup> | X                                                         | Time (h) | Isolated yield (%) | Ee (%) <sup>b</sup> |
|--------------------|-----------------------------------------------------------|----------|--------------------|---------------------|
| 1                  | BF <sub>4</sub>                                           | 0.3      | 58                 | 90.5                |
| 2                  | OTf                                                       | 1.0      | 47                 | 92                  |
| 3                  | SbF <sub>6</sub>                                          | 10       | 38                 | 88                  |
| 4                  | AsF <sub>6</sub>                                          | 2.0      | 38                 | 90                  |
| 5                  | PF <sub>6</sub>                                           | 24       | trace              | -                   |
| 6                  | NTf <sub>2</sub>                                          | 24       | trace              | -                   |
| 7                  | MeSO <sub>3</sub>                                         | 24       | trace              | -                   |
| 8                  | <i>p</i> -MeC <sub>6</sub> H <sub>4</sub> SO <sub>3</sub> | 24       | trace              | -                   |
| 9 <sup>c</sup>     | BAr <sup>F</sup> <sub>4</sub>                             | 24       | trace              | -                   |

<sup>a</sup>Determined by crude <sup>1</sup>H NMR; <sup>b</sup>Determined by chiral HPLC analysis; <sup>c</sup>NaBAr<sup>F</sup><sub>4</sub> was used as salt (Ar = 3,5-(CF<sub>3</sub>)<sub>2</sub>C<sub>6</sub>H<sub>3</sub>).

Having identified that AgOTf was the best silver salt for the reaction, we started to evaluate the reactivity in various solvents (Table S3). For these commonly used solvents, the use of aromatic ones could give rise to better yield and enantioselectivity in general (entries 1-5 vs. 6-13). And again, PhF was the best one as 92% ee was observed (entry 1). Surprisingly, when 1,2-F<sub>2</sub>C<sub>6</sub>H<sub>4</sub> was employed for the reaction, a dramatic decrease of enantioselectivity was observed (entry 2), which indicated that fluorinated aromatic solvents might play a very important role for the enantioselectivity and promoted us to screen other fluorinated aromatic solvents systematically.

**Table S3.** Solvent screen

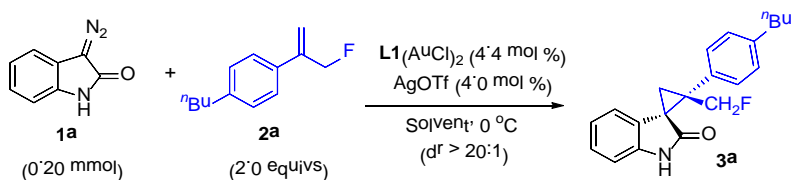

| Entry <sup>a</sup> | Solvent                                          | Time (h) | Isolated yield (%) | Ee (%) <sup>b</sup> |
|--------------------|--------------------------------------------------|----------|--------------------|---------------------|
| 1                  | PhF                                              | 1.0      | 47                 | 92                  |
| 2                  | 1,2-F <sub>2</sub> C <sub>6</sub> H <sub>4</sub> | 1.5      | 54                 | 82                  |
| 3                  | PhMe                                             | 24       | 26                 | 92                  |
| 4                  | PhCF <sub>3</sub>                                | 3        | 52                 | 87                  |
| 5                  | PhCl                                             | 22       | 43                 | 90                  |
| 6                  | Et <sub>2</sub> O                                | 12       | 26                 | 86                  |
| 7                  | THF                                              | 0.5      | 20                 | 87                  |
| 8                  | CH <sub>2</sub> Cl <sub>2</sub>                  | 0.3      | 55                 | 82                  |
| 9                  | ClCH <sub>2</sub> CH <sub>2</sub> Cl             | 0.3      | 53                 | 77                  |
| 10                 | acetone                                          | 0.1      | 7                  | 63                  |
| 11                 | EtOAc                                            | 1        | 15                 | 90                  |
| 12 <sup>c</sup>    | DMF                                              | 24       | 0                  |                     |
| 13 <sup>c</sup>    | MeCN                                             | 1        | 0                  |                     |

<sup>a</sup>Determined by crude <sup>1</sup>H NMR; <sup>b</sup>Determined by chiral HPLC analysis;

<sup>c</sup>Full decomposition of **1a** was observed.

Unexpectedly, of thirteen fluorinated aromatic solvents we screened (Table S4), up to 95% ee could be detected when 1,4-F<sub>2</sub>C<sub>6</sub>H<sub>4</sub> or 4-F-C<sub>6</sub>H<sub>4</sub>Cl was used as solvent (entries 4 and 5). Since a little higher yield was isolated in the presence of 1,4-F<sub>2</sub>C<sub>6</sub>H<sub>4</sub>, we decided to use this as the best solvent for the reaction. It should be pointed out that due to the very poor solubility of the catalyst in solvents such as 1,3,5-F<sub>3</sub>C<sub>6</sub>H<sub>3</sub>, 1,2,4,5-F<sub>4</sub>C<sub>6</sub>H<sub>2</sub>, 1,2,3,5-F<sub>4</sub>C<sub>6</sub>H<sub>2</sub> and C<sub>6</sub>F<sub>6</sub>, we didn't see any reactivity (entries 10-13).

**Table S4.** Fluorinated aromatic solvent screen

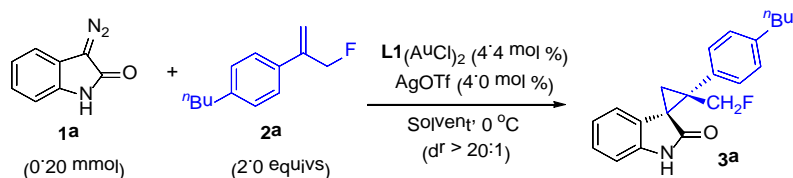

| Entry <sup>a</sup> | Solvent                                              | Time (h) | Isolated yield (%) | Ee (%) <sup>b</sup> |
|--------------------|------------------------------------------------------|----------|--------------------|---------------------|
| 1                  | PhF                                                  | 1.0      | 47                 | 92                  |
| 2                  | 1,2-F <sub>2</sub> C <sub>6</sub> H <sub>4</sub>     | 1.5      | 54                 | 82                  |
| 3                  | 1,3-F <sub>2</sub> C <sub>6</sub> H <sub>4</sub>     | 0.3      | 52                 | 92                  |
| 4                  | 1,4-F <sub>2</sub> C <sub>6</sub> H <sub>4</sub>     | 9        | 51                 | 95                  |
| 5                  | 4-F-C <sub>6</sub> H <sub>4</sub> Cl                 | 13       | 42                 | 95                  |
| 6                  | 4-F-C <sub>6</sub> H <sub>4</sub> Me                 | 84       | 12                 | 89                  |
| 7                  | 1,2,3-F <sub>3</sub> C <sub>6</sub> H <sub>3</sub>   | 1        | 49                 | 67                  |
| 8                  | 1,2,4-F <sub>3</sub> C <sub>6</sub> H <sub>3</sub>   | 1        | 34                 | 92                  |
| 9                  | 1,2,3,4-F <sub>4</sub> C <sub>6</sub> H <sub>2</sub> | 3        | 44                 | 77                  |
| 10                 | 1,3,5-F <sub>3</sub> C <sub>6</sub> H <sub>3</sub>   | 24       | n.r.               | -                   |
| 11                 | 1,2,4,5-F <sub>4</sub> C <sub>6</sub> H <sub>2</sub> | 24       | n.r.               | -                   |
| 12                 | C <sub>6</sub> F <sub>5</sub> H                      | 24       | n.r.               | -                   |
| 13                 | C <sub>6</sub> F <sub>6</sub>                        | 24       | n.r.               | -                   |

<sup>a</sup>Determined by crude <sup>1</sup>H NMR; <sup>b</sup>Determined by chiral HPLC analysis;  
n.r. = no reaction.

## Part II General procedure for Au(I) catalyzed stereoselective cyclopropanation of diazooxindoles **1** and experimental data for products **3**

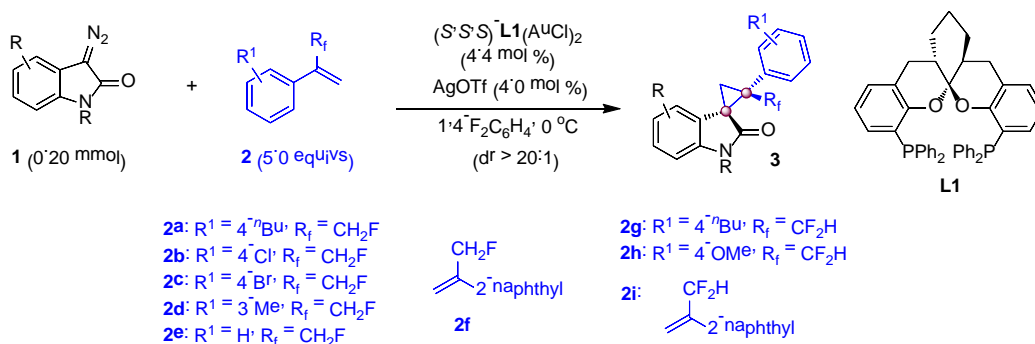

All the racemic compounds were prepared using 5 mol % of PPh<sub>3</sub>AuOTf generated *in situ* as catalyst in CH<sub>2</sub>Cl<sub>2</sub> at room temperature.

The synthesis of products **3b-3l** were carried out at 0 °C: under N<sub>2</sub> atmosphere, to an over-dried Schlenk tube were added (*S, S, S*)-**L1**-(AuCl)<sub>2</sub> (9.9 mg, 0.088 mmol, 4.4 mol %) and AgOTf (2.0 mg, 0.080 mmol, 4.0 mol %), followed by 4.0 mL of anhydrous 1,4-F<sub>2</sub>C<sub>6</sub>H<sub>4</sub>. After the solution was stirred at 25 °C for 0.5 hour, alkene (1.0 mmol) was added. The reaction mixture was cooled to 0 °C and stirred for 0.5 hour, then 3-diazooxindole **1** (0.20 mmol) was added directly. The resulting mixture was stirred at 0 °C till almost full conversion of **1** by TLC analysis and diluted with brine, extracted with EtOAc three times (3×5 mL). The organic layer was dried by Na<sub>2</sub>SO<sub>4</sub>, concentrated in vacuum. To determine the diastereoselectivity of product, the residue was first dissolved in acetone-d<sub>6</sub>, and took some samples for NMR analysis. Then the sample for analysis and the rest of the product were recombined for column chromatographic purification using the indicated solvent mixtures to afford the desired products.

Procedures for the synthesis of products **3a** were the same as the above except alkene (0.6 mmol) was used. Procedures for the synthesis of products **3m-3p** were the same as the above except alkene (2.0 mmol) was used and the reaction was running at 10 °C.

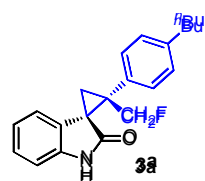

Column chromatography (5% acetone in CH<sub>2</sub>Cl<sub>2</sub>) afforded product **3a** in 65% yield as red oil. <sup>1</sup>H NMR analysis revealed that the dr is above 20:1. HPLC analysis (Chiralcel AD-H, iPrOH/hexane = 10/90, 1.0 mL/min, 230 nm; major diastereomer: t<sub>r</sub>(minor) = 6.10 min, t<sub>r</sub>(major) = 17.35 min) gave the isomeric composition of the product: 95% ee,

[α]<sub>D</sub><sup>25</sup> = +192.4 (c = 4.30, acetone); <sup>1</sup>H NMR (400 MHz, acetone-d<sub>6</sub>): δ 9.66 (s, br, 1H), 7.15 (br, 4H), 7.07-7.03 (m, 1H), 6.94-6.92 (m, 1H), 6.51 (t, *J* = 7.6 Hz, 1H), 5.52 (d, *J* = 7.6 Hz, 1H), 5.23 (ABd, *J*<sub>1</sub> = 9.2 Hz, *J*<sub>2</sub> = 46.8 Hz, 1H), 4.98 (ABd, *J*<sub>1</sub> = 9.6 Hz, *J*<sub>2</sub> = 48.4 Hz, 1H), 2.64-2.60 (m, 2H), 2.20-2.18 (m,

1H), 2.14-2.12 (m, 1H), 1.64-1.56 (m, 2H), 1.38-1.29 (m, 2H), 0.92 (t,  $J = 7.6$  Hz, 3H);  $^{13}\text{C}$  NMR (100 MHz, acetone- $d_6$ ):  $\delta$  176.39, 142.87, 142.48, 134.99, 131.22, 128.75, 128.47, 127.23, 122.62, 120.86, 109.52 (d,  $^3J_{\text{F-C}} = 5.0$  Hz), 84.67 (d,  $^1J_{\text{F-C}} = 167$  Hz), 43.92 (d,  $^2J_{\text{F-C}} = 22.0$  Hz), 35.77 (d,  $^3J_{\text{F-C}} = 6.0$  Hz), 35.48, 34.04, 26.84 (d,  $^3J_{\text{F-C}} = 7.0$  Hz), 22.46, 13.85;  $^{19}\text{F}$  NMR (376 MHz, acetone- $d_6$ ):  $\delta$  -216.85; IR (ATR): 3203, 2928, 1697, 1620, 1469, 1358, 1218; GC-MS: 323 ( $\text{M}^+$ , 16), 132 (100), 246 (19), 303 (17), 147 (14), 260 (8), 275 (7), 217 (4); HRMS (EI): Exact mass calcd for  $\text{C}_{21}\text{H}_{22}\text{NOF}$  [ $\text{M}$ ] $^+$ : 323.1685, Found: 323.1682.

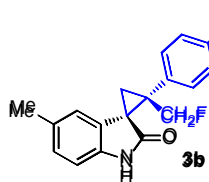

Column chromatography (5% acetone in  $\text{CH}_2\text{Cl}_2$ ) afforded product **3b** in 62% yield as white solid (m. p. 129-131  $^\circ\text{C}$ ).  $^1\text{H}$  NMR analysis revealed that the dr is above 20:1. HPLC analysis (Chiralcel AD-H,  $i\text{PrOH}$ /hexane = 10/90, 1.0 mL/min, 230 nm; major diastereomer:  $t_r$  (minor) = 5.31 min,  $t_r$  (major) = 10.24 min) gave the isomeric

composition of the product: 92% ee,  $[\alpha]_D^{25} = +132.7$  ( $c = 1.26$ , acetone);  $^1\text{H}$  NMR (400 MHz, acetone- $d_6$ ):  $\delta$  9.60 (s, br, 1H), 7.15 (br, 4H), 6.87-6.80 (m, 2H), 5.29 (m, 1H), 5.23 (ABd,  $J_1 = 9.6$  Hz,  $J_2 = 46.8$  Hz, 1H), 4.99 (ABd,  $J_1 = 9.4$  Hz,  $J_2 = 48.4$  Hz, 1H), 2.65-2.61 (m, 2H), 2.16-2.11 (m, 2H), 1.89 (s, 3H), 1.64-1.57 (m, 2H), 1.38-1.29 (m, 2H), 0.92 (t,  $J = 7.2$  Hz, 3H);  $^{13}\text{C}$  NMR (100 MHz, acetone- $d_6$ ):  $\delta$  176.89, 143.20, 140.40, 135.44, 131.61, 130.27, 129.08, 128.93, 127.86, 123.95, 109.56, 85.02 (d,  $^1J_{\text{F-C}} = 167$  Hz), 44.21 (d,  $^2J_{\text{F-C}} = 22$  Hz), 36.14 (d,  $^3J_{\text{F-C}} = 5.0$  Hz), 35.85, 34.60, 27.18 (d,  $^3J_{\text{F-C}} = 7.0$  Hz), 22.75, 21.05, 14.25;  $^{19}\text{F}$  NMR (376 MHz, acetone- $d_6$ ):  $\delta$  -216.81; IR (ATR): 3290, 2927, 1711, 1670, 1492, 1357, 1309, 1217; GC-MS: 337 ( $\text{M}^+$ , 14), 146 (100), 91 (18), 118 (14), 317 (12), 260 (11), 289 (8), 207 (7); HRMS (EI): Exact mass calcd for  $\text{C}_{22}\text{H}_{24}\text{NOF}$  [ $\text{M}$ ] $^+$ : 337.1842, Found: 337.1844.

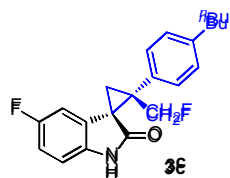

Column chromatography (5% acetone in  $\text{CH}_2\text{Cl}_2$ ) afforded product **3c** in 74% yield as white solid (m. p. 96-98  $^\circ\text{C}$ ).  $^1\text{H}$  NMR analysis revealed that the dr is above 20:1. HPLC analysis (Chiralcel AD-H,  $i\text{PrOH}$ /hexane = 10/90, 1.0 mL/min, 230 nm; major diastereomer:  $t_r$  (minor) = 6.25 min,  $t_r$  (major) = 13.76 min) gave the isomeric

composition of the product: 93% ee,  $[\alpha]_D^{25} = +123.3$  ( $c = 1.71$ , acetone);  $^1\text{H}$  NMR (400 MHz, acetone- $d_6$ ):  $\delta$  9.71 (s, br, 1H), 7.19 (br, 4H), 6.93-6.90 (m, 1H), 6.82 (td,  $J_1 = 10.2$  Hz,  $J_2 = 2.4$  Hz, 1H), 5.25 (ABd,  $J_1 = 9.6$  Hz,  $J_2 = 46.8$  Hz, 1H), 5.25 (dd,  $J_1 = 9.2$  Hz,  $J_2 = 2.4$  Hz, 1H), 4.99 (ABd,  $J_1 = 9.6$  Hz,  $J_2 = 48.4$  Hz, 1H), 2.65-2.61 (m, 2H), 2.29-2.26 (m, 1H), 2.18-2.17 (m, 1H), 1.64-1.56 (m, 2H), 1.38-1.28 (m, 2H), 0.91 (t,  $J = 7.4$  Hz, 3H);  $^{13}\text{C}$  NMR (100 MHz, acetone- $d_6$ ):  $\delta$  176.70, 158.58 (d,  $^1J_{\text{F-C}}$



= 235 Hz), 143.57, 138.92 (d,  $^4J_{F-C} = 1.0$  Hz), 134.91, 131.88, 130.88 (d,  $^3J_{F-C} = 9.0$  Hz), 129.30, 113.72 (d,  $^2J_{F-C} = 23$  Hz), 110.67 (d,  $^2J_{F-C} = 26.2$  Hz), 110.40 (d,  $^3J_{F-C} = 8.4$  Hz), 84.88 (d,  $^1J_{F-C} = 168$  Hz), 44.84 (d,  $^2J_{F-C} = 22$  Hz), 36.62 (dd,  $^3J_{F-C} = 5.4$  Hz,  $^4J_{F-C} = 2.9$  Hz), 35.85, 34.43, 27.58 (d,  $^3J_{F-C} = 7.0$  Hz), 22.78, 14.24;  $^{19}\text{F}$  NMR (376 MHz, acetone- $d_6$ ):  $\delta$  -124.11, -216.86; IR (ATR): 3196, 2928, 1701, 1466, 1231, 1159; GC-MS: 341 ( $M^+$ , 62), 129 (100), 150 (98), 264 (79), 321 (78), 278 (36), 250 (29), 293 (25); HRMS (EI): Exact mass calcd for  $\text{C}_{21}\text{H}_{21}\text{NOF}_2$  [ $M$ ] $^+$ : 341.1591, Found: 341.1589.

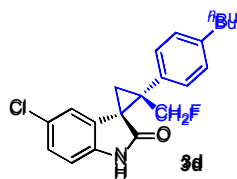

Column chromatography (5% acetone in  $\text{CH}_2\text{Cl}_2$ ) afforded product **3d** in 72% yield as white solid (m. p. 95-97 °C).  $^1\text{H}$  NMR analysis revealed that the dr is above 20:1.

HPLC analysis (Chiralcel AD-H,  $i$ PrOH/hexane = 10/90, 1.0 mL/min, 230 nm; major diastereomer:  $t_r$ (minor) = 5.96 min,  $t_r$ (major) = 10.57 min) gave the isomeric

composition of the product: 92% ee,  $[\alpha]_D^{25} = +5.4$  ( $c = 2.00$ , acetone);  $^1\text{H}$  NMR (400 MHz, acetone- $d_6$ ):  $\delta$  9.78 (s, br, 1H), 7.19 (br, 4H), 7.08-7.06 (m, 1H), 6.94-6.92 (m, 1H), 5.44-5.43 (m, 1H), 5.24 (ABd,  $J_1 = 9.6$  Hz,  $J_2 = 46.8$  Hz, 1H), 4.98 (ABd,  $J_1 = 9.2$  Hz,  $J_2 = 48.0$  Hz, 1H), 2.64 (t,  $J = 7.6$  Hz, 2H), 2.31-2.28 (m, 1H), 2.19-2.17 (m, 1H), 1.65-1.57 (m, 2H), 1.37-1.30 (m, 2H), 0.91 (t,  $J = 7.2$  Hz, 3H);  $^{13}\text{C}$  NMR (100 MHz, acetone- $d_6$ ):  $\delta$  176.41, 143.60, 141.57, 134.87, 131.84, 130.98, 129.31, 127.37, 126.25, 123.23, 111.00, 84.81 (d,  $^1J_{F-C} = 168.0$  Hz), 44.94 (d,  $^2J_{F-C} = 22.2$  Hz), 36.32 (d,  $^3J_{F-C} = 5.0$  Hz), 35.88, 34.51, 27.60 (d,  $^3J_{F-C} = 7.0$  Hz), 22.74, 14.30;  $^{19}\text{F}$  NMR (376 MHz, acetone- $d_6$ ):  $\delta$  -216.96; IR (ATR): 3318, 1715, 1678, 1484, 1358, 1217, 1134, 1064, 1001; GC-MS: 357, 359 ( $M^+$ , 25, 8), 207 (100), 129 (83), 166 (55), 281 (37), 337 (25), 246 (23), 302 (18); HRMS (EI): Exact mass calcd for  $\text{C}_{21}\text{H}_{21}\text{NOF}^{35}\text{Cl}$  [ $M$ ] $^+$ : 357.1296, Found: 357.1293; Exact mass calcd for  $\text{C}_{21}\text{H}_{21}\text{NOF}^{37}\text{Cl}$  [ $M$ ] $^+$ : 359.1266, Found: 359.1264;

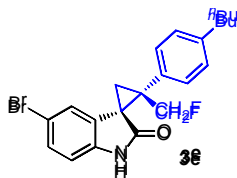

Column chromatography (5% acetone in  $\text{CH}_2\text{Cl}_2$ ) afforded product **3e** in 79% yield as white solid (m. p. 94-96 °C).  $^1\text{H}$  NMR analysis revealed that the dr is above 20:1.

HPLC analysis (Chiralcel AD-H,  $i$ PrOH/hexane = 10/90, 1.0 mL/min, 230 nm; major diastereomer:  $t_r$ (minor) = 6.08 min,  $t_r$ (major) = 10.67 min) gave the isomeric

composition of the product: 92% ee,  $[\alpha]_D^{25} = -13.6$  ( $c = 1.33$ , acetone);  $^1\text{H}$  NMR (400 MHz, acetone- $d_6$ ):  $\delta$  9.76 (s, br, 1H), 7.23-7.20 (m, 5H), 6.90-6.88 (m, 1H), 5.571-5.566 (m, 1H), 5.24 (ABd,  $J_1 = 9.2$  Hz,  $J_2 = 46.8$  Hz, 1H), 4.98 (ABd,  $J_1 = 9.6$  Hz,  $J_2 = 48.4$  Hz, 1H), 2.64 (t,  $J = 8.4$  Hz, 2H), 2.32-2.30 (m, 1H), 2.18-2.16 (m, 1H), 1.66-1.59 (m, 2H), 1.41-1.31 (m, 2H), 0.92 (t,  $J = 7.6$  Hz, 3H);  $^{13}\text{C}$  NMR (100 MHz,

acetone-d<sub>6</sub>):  $\delta$  176.27, 143.62, 141.99, 134.83, 131.94, 131.34, 130.26, 129.29, 126.05, 113.56, 111.50, 84.79 (d,  $^1J_{F-C}$  = 168.0 Hz), 44.97 (d,  $^2J_{F-C}$  = 22.0 Hz), 36.24 (d,  $^3J_{F-C}$  = 5.0 Hz), 35.91, 34.55, 27.62 (d,  $^3J_{F-C}$  = 7.0 Hz), 22.80, 14.34;  $^{19}\text{F}$  NMR (376 MHz, acetone-d<sub>6</sub>):  $\delta$  -216.95; IR (ATR): 3202, 2926, 1706, 1617, 1475, 1356, 1219, 1062, 1005; GC-MS: 401, 403 ( $\text{M}^+$ , 11, 11), 207 (100), 133 (67), 281 (31), 191 (27), 246 (23), 383 (11), 326 (10); HRMS (EI): Exact mass calcd for  $\text{C}_{21}\text{H}_{21}\text{NOF}^{79}\text{Br} [\text{M}]^+$ : 401.0791, Found: 401.0789; Exact mass calcd for  $\text{C}_{21}\text{H}_{21}\text{NOF}^{81}\text{Br} [\text{M}]^+$ : 403.0770, Found: 403.0767.

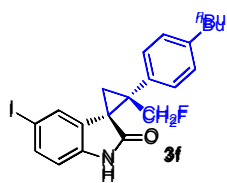

Column chromatography (5% acetone in  $\text{CH}_2\text{Cl}_2$ ) afforded product **3f** in 80% yield as white solid (m. p. 280-282 °C).  $^1\text{H}$  NMR analysis revealed that the dr is above 20:1. HPLC analysis (Chiralcel AD-H,  $i\text{PrOH}$ /hexane = 10/90, 1.0 mL/min, 230 nm; major diastereomer:  $t_r$  (minor) = 5.74 min,  $t_r$  (major) = 10.98 min) gave the isomeric

composition of the product: 90% ee,  $[\alpha]_D^{25}$  = -62.0 ( $c$  = 1.76, acetone);  $^1\text{H}$  NMR (400 MHz, acetone-d<sub>6</sub>):  $\delta$  9.74 (s, br, 1H), 7.40 (dd,  $J_1$  = 8.0 Hz,  $J_2$  = 4.0 Hz, 1H), 7.20 (br, 4H), 6.79 (d,  $J$  = 8.0 Hz, 1H), 5.75 (d,  $J$  = 4.0 Hz, 1H), 5.22 (ABd,  $J_1$  = 9.6 Hz,  $J_2$  = 47.2 Hz, 1H), 4.97 (ABd,  $J_1$  = 9.2 Hz,  $J_2$  = 48.0 Hz, 1H), 2.65 (t,  $J$  = 7.6 Hz, 2H), 2.30-2.27 (m, 1H), 2.17-2.14 (m, 1H), 1.69-1.62 (m, 2H), 1.44-1.34 (m, 2H), 0.93 (t,  $J$  = 7.6 Hz, 3H);  $^{13}\text{C}$  NMR (100 MHz, acetone-d<sub>6</sub>):  $\delta$  176.06, 143.63, 142.55, 136.25, 134.83, 131.87, 131.55, 129.21, 112.06, 84.77 (d,  $^1J_{F-C}$  = 168.0 Hz), 83.34, 44.92 (d,  $^2J_{F-C}$  = 22.0 Hz), 36.05 (d,  $^3J_{F-C}$  = 5.0 Hz), 35.96, 34.63, 27.58 (d,  $^3J_{F-C}$  = 7.0 Hz), 22.95, 14.39;  $^{19}\text{F}$  NMR (376 MHz, acetone-d<sub>6</sub>):  $\delta$  -216.93; IR (ATR): 3182, 2927, 1704, 1614, 1473, 1355, 1303, 1217.; GC-MS: 449 ( $\text{M}^+$ , 64), 258 (100), 129 (97), 246 (88), 429 (61), 147 (51), 372 (48), 207 (45); HRMS (EI): Exact mass calcd for  $\text{C}_{21}\text{H}_{21}\text{NOFI} [\text{M}]^+$ : 449.0652, Found: 449.0650.

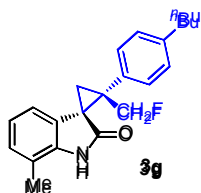

Column chromatography (5% acetone in  $\text{CH}_2\text{Cl}_2$ ) afforded product **3g** in 59% yield as white solid (m. p. 75-77°C).  $^1\text{H}$  NMR analysis revealed that the dr is above 20:1. HPLC analysis (Chiralcel AD-H,  $i\text{PrOH}$ /hexane = 10/90, 1.0 mL/min, 230 nm; major diastereomer:  $t_r$  (minor) = 6.77 min,  $t_r$  (major) = 22.90 min) gave the isomeric

composition of the product: 92% ee,  $[\alpha]_D^{25}$  = +97.1 ( $c$  = 1.51, acetone);  $^1\text{H}$  NMR (400 MHz, acetone-d<sub>6</sub>):  $\delta$  9.64 (s, br, 1H), 7.14 (br, 4H), 6.88 (d,  $J$  = 7.6 Hz, 1H), 6.43 (t,  $J$  = 7.6 Hz, 1H), 5.36 (d,  $J$  = 7.2 Hz, 1H), 5.24 (ABd,  $J_1$  = 9.2 Hz,  $J_2$  = 46.8 Hz, 1H), 4.98 (ABd,  $J_1$  = 9.2 Hz,  $J_2$  = 48.8 Hz, 1H), 2.64-2.60 (m, 2H), 2.30 (s, 3H), 2.17-2.15 (m, 1H), 2.12-2.10 (m, 1H), 1.63-1.55 (m, 2H), 1.38-1.28 (m, 2H), 0.92 (t,  $J$  = 7.6 Hz, 3H);  $^{13}\text{C}$  NMR (100 MHz, acetone-d<sub>6</sub>):  $\delta$  177.43, 143.19, 141.32, 135.40, 131.71, 129.30,

129.06 (d,  $^3J_{F-C} = 8.0$  Hz), 128.44, 121.32, 120.49, 119.30, 85.10 (d,  $^1J_{F-C} = 168.0$  Hz), 44.38 (d,  $^2J_{F-C} = 22.0$  Hz), 36.40 (d,  $^3J_{F-C} = 5.0$  Hz), 35.86, 34.43, 27.37 (d,  $^3J_{F-C} = 7.0$  Hz), 22.84, 16.62, 14.26;  $^{19}\text{F}$  NMR (376 MHz, acetone- $d_6$ ):  $\delta$  -216.77; IR (ATR): 3176, 2928, 1694, 1626, 1458, 1358, 1217; GC-MS: 337 ( $M^+$ , 18), 146 (100), 91 (21), 118 (20), 317 (17), 260 (16), 289 (10), 207 (5); HRMS (EI): Exact mass calcd for  $\text{C}_{22}\text{H}_{24}\text{NOF}$  [ $M$ ] $^+$ : 337.1842, Found: 337.1841.

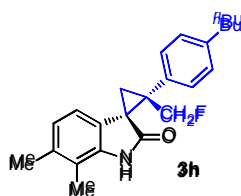

Column chromatography (5% acetone in  $\text{CH}_2\text{Cl}_2$ ) afforded product **3h** in 57% yield as white solid (m. p. 199-201  $^\circ\text{C}$ ).  $^1\text{H}$  NMR analysis revealed that the dr is above 20:1. HPLC analysis (Chiralcel AD-H,  $i$ PrOH/hexane = 10/90, 1.0 mL/min, 230 nm; major diastereomer:  $t_r$  (minor) = 6.50 min,  $t_r$  (major) = 20.18 min) gave the isomeric

composition of the product: 87% ee,  $[\alpha]_D^{25} = +115.0$  ( $c = 0.75$ , acetone);  $^1\text{H}$  NMR (400 MHz, acetone- $d_6$ ):  $\delta$  9.64 (s, br, 1H), 7.14 (br, 4H), 6.34 (d,  $J = 7.6$  Hz, 1H), 5.25 (d,  $J = 10.0$  Hz, 1H), 5.23 (ABd,  $J_1 = 9.2$  Hz,  $J_2 = 46.8$  Hz, 1H), 4.97 (ABd,  $J_1 = 9.2$  Hz,  $J_2 = 48.4$  Hz, 1H), 2.62 (t,  $J = 7.6$  Hz, 2H), 2.16 (s, 3H), 2.12 (s, 3H), 2.11-2.08 (m, 2H), 1.63-1.56 (m, 2H), 1.38-1.29 (m, 2H), 0.92 (t,  $J = 7.6$  Hz, 3H);  $^{13}\text{C}$  NMR (100 MHz, acetone- $d_6$ ):  $\delta$  177.58, 143.14, 141.49, 136.08, 135.54, 131.65, 129.09, 126.12, 122.76, 120.16, 118.04, 85.18 (d,  $^1J_{F-C} = 167.0$  Hz), 44.05 (d,  $^2J_{F-C} = 22.0$  Hz), 36.46 (d,  $^3J_{F-C} = 5.0$  Hz), 35.89, 34.47, 27.16 (d,  $^3J_{F-C} = 8.0$  Hz), 22.88, 19.80, 14.27, 13.23;  $^{19}\text{F}$  NMR (376 MHz, acetone- $d_6$ ):  $\delta$  -216.65; IR (ATR): 3233, 2925, 1700, 1628, 1453, 1355, 1214; GC-MS: 351 ( $M^+$ , 12), 160 (100), 207 (55), 133 (34), 281 (18), 191 (12), 331 (10), 253 (9); HRMS (EI): Exact mass calcd for  $\text{C}_{23}\text{H}_{26}\text{NOF}$  [ $M$ ] $^+$ : 351.1998, Found: 351.1996.

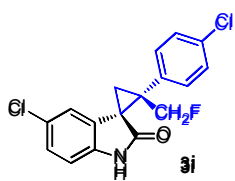

Column chromatography (5% acetone in  $\text{CH}_2\text{Cl}_2$ ) afforded product **3i** in 78% yield as white solid (m. p. 194-196  $^\circ\text{C}$ ).  $^1\text{H}$  NMR analysis revealed that the dr is above 20:1. HPLC analysis (Chiralcel AD-H,  $i$ PrOH/hexane = 10/90, 1.0 mL/min, 230 nm; major diastereomer:  $t_r$  (minor) = 10.61 min,  $t_r$  (major) = 18.37 min) gave the isomeric

composition of the product: 93% ee,  $[\alpha]_D^{25} = -8.2$  ( $c = 1.22$ , acetone);  $^1\text{H}$  NMR (400 MHz, acetone- $d_6$ ):  $\delta$  9.80 (s, br, 1H), 7.41 (br, 4H), 7.12-7.10 (m, 1H), 6.97-6.95 (m, 1H), 5.562-5.557 (m, 1H), 5.24 (ABd,  $J_1 = 9.6$  Hz,  $J_2 = 46.8$  Hz, 1H), 4.97 (ABd,  $J_1 = 9.6$  Hz,  $J_2 = 48.4$  Hz, 1H), 2.37-2.34 (m, 1H), 2.22-2.20 (m, 1H);  $^{13}\text{C}$  NMR (100 MHz, acetone- $d_6$ ):  $\delta$  176.08, 141.77, 136.59, 134.42, 133.64, 130.60, 129.35, 127.69, 126.33, 123.16, 111.26, 84.64 (d,  $^1J_{F-C} = 168.0$  Hz), 44.38 (d,  $^2J_{F-C} = 22.0$  Hz), 36.24 (d,  $^3J_{F-C} = 5.0$  Hz), 27.22 (d,  $^3J_{F-C} = 7.0$  Hz);  $^{19}\text{F}$  NMR (376 MHz, acetone- $d_6$ ):  $\delta$  -217.17; IR (ATR): 3313, 1713,

1676, 1473, 1351, 1298, 1219, 1085, 1001; GC-MS: 335, 337 ( $M^+$ , 10, 7), 166 (100), 207 (96), 73 (60), 281 (25), 253 (18), 315 (5), 131 (5); HRMS (EI): Exact mass calcd for  $C_{17}H_{12}NOF^{35}Cl_2 [M]^+$ : 335.0280, Found: 335.0281; Exact mass calcd for  $C_{17}H_{12}NOF^{35}Cl^{37}Cl [M]^+$ : 337.0254, Found: 337.0250.

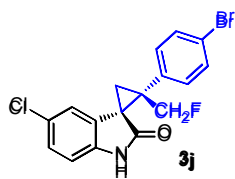

Column chromatography (5% acetone in  $CH_2Cl_2$ ) afforded product **3j** in 65% yield as white solid (m. p. 188-190 °C).  $^1H$  NMR analysis revealed that the dr is above 20:1. HPLC analysis (Chiralcel AD-H,  $i$ PrOH/hexane = 10/90, 1.0 mL/min, 230 nm; major diastereomer:  $t_r$  (minor) = 11.13 min,  $t_r$  (major) = 19.63 min) gave the isomeric

composition of the product: 93% ee,  $[\alpha]_D^{25} = +0.2$  ( $c = 0.41$ , acetone);  $^1H$  NMR (400 MHz, acetone- $d_6$ ):  $\delta$  9.82 (s, br, 1H), 7.55 (br, 4H), 7.12-7.09 (m, 1H), 6.97-6.95 (m, 1H), 5.56 (d,  $J = 2.4$  Hz, 1H), 5.24 (ABd,  $J_1 = 9.6$  Hz,  $J_2 = 46.8$  Hz, 1H), 4.97 (ABd,  $J_1 = 9.6$  Hz,  $J_2 = 48.4$  Hz, 1H), 2.36-2.33 (m, 1H), 2.22-2.20 (m, 1H);  $^{13}C$  NMR (100 MHz, acetone- $d_6$ ):  $\delta$  176.09, 141.72, 137.00, 134.00, 132.33, 130.54, 127.68, 126.32, 123.12, 122.56, 111.25, 84.56 (d,  $^1J_{F-C} = 168.0$  Hz), 44.43 (d,  $^2J_{F-C} = 22.0$  Hz), 36.18 (d,  $^3J_{F-C} = 5.0$  Hz), 27.16 (d,  $^3J_{F-C} = 7.0$  Hz);  $^{19}F$  NMR (376 MHz, acetone- $d_6$ ):  $\delta$  -217.11; IR (ATR): 3320, 2920, 1714, 1678, 1484, 1218, 1134, 1000; GC-MS: 379, 381 ( $M^+$ , 3, 3), 207 (100), 133 (54), 166 (50), 281 (26), 191 (24), 253 (19), 327 (5); HRMS (EI): Exact mass calcd for  $C_{17}H_{12}NOF^{35}Cl^{79}Br [M]^+$ : 378.9775, Found: 378.9777; Exact mass calcd for  $C_{17}H_{12}NOF^{35}Cl^{81}Br [M]^+$ : 380.9754, Found: 378.9753; Exact mass calcd for  $C_{17}H_{12}NOF^{37}Cl^{79}Br [M]^+$ : 380.9745, Found: 380.9744;

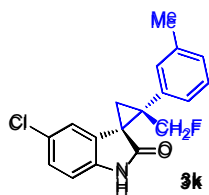

Column chromatography (5% acetone in  $CH_2Cl_2$ ) afforded product **3k** in 87% yield as white solid (m. p. 163-165 °C).  $^1H$  NMR analysis revealed that the dr is above 20:1. HPLC analysis (Chiralcel AD-H,  $i$ PrOH/hexane = 10/90, 1.0 mL/min, 230 nm; major diastereomer:  $t_r$  (minor) = 6.27 min,  $t_r$  (major) = 9.54 min) gave the isomeric

composition of the product: 94% ee,  $[\alpha]_D^{25} = -26.9$  ( $c = 2.00$ , acetone);  $^1H$  NMR (400 MHz, acetone- $d_6$ ):  $\delta$  9.78 (s, br, 1H), 7.24-7.17 (m, 4H), 7.11-7.06 (m, 1H), 6.97-6.93 (m, 1H), 5.51-5.49 (m, 1H), 5.32-5.16 (m, 1H), 5.09-4.92 (m, 1H), 2.33-2.16 (m, 5H);  $^{13}C$  NMR (100 MHz, acetone- $d_6$ ):  $\delta$  176.41, 141.60, 138.83, 137.55, 132.29, 130.98, 129.55, 129.11, 127.43, 126.22, 123.30, 110.04, 84.86 (d,  $^1J_{F-C} = 167.0$  Hz), 45.16 (d,  $^2J_{F-C} = 23.0$  Hz), 36.28 (d,  $^3J_{F-C} = 5.0$  Hz), 27.66 (d,  $^3J_{F-C} = 8.0$  Hz), 21.40;  $^{19}F$  NMR (376 MHz, acetone- $d_6$ ):  $\delta$  -216.89; IR (ATR): 3199, 2917, 1704, 1513, 1476, 1297, 1221, 1028; GC-MS: 315, 317 ( $M^+$ , 28, 9), 129 (100), 166 (61), 260 (24), 207 (24), 295 (21), 102 (19), 75 (18); HRMS (EI): Exact mass calcd for  $C_{18}H_{15}NOF^{35}Cl [M]^+$ : 315.0826, Found: 315.0825; Exact mass calcd

for  $C_{18}H_{15}NOF^{37}Cl [M]^+$ : 317.0797, Found: 317.0799.

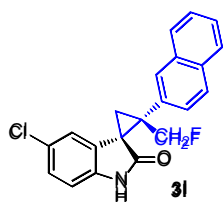

Column chromatography (5% acetone in  $CH_2Cl_2$ ) afforded product **3l** in 93% yield as white solid (m. p. 197-199 °C).  $^1H$  NMR analysis revealed that the dr is above 20:1.

HPLC analysis (Chiralcel AD-H,  $iPrOH$ /hexane = 10/90, 1.0 mL/min, 230 nm; major diastereomer:  $t_r$  (minor) = 14.16 min,  $t_r$  (major) = 22.62 min) gave the isomeric

composition of the product: 92% ee,  $[\alpha]_D^{25} = +92.3$  ( $c = 0.92$ , acetone);  $^1H$  NMR (400 MHz, acetone- $d_6$ ):  $\delta$  9.84 (s, br, 1H), 7.92-7.85 (m, 4H), 7.54-7.52 (m, 3H), 7.06-7.03 (m, 1H), 6.97-6.94 (m, 1H), 5.49 (s, 1H), 5.34 (ABd,  $J_1 = 9.6$  Hz,  $J_2 = 46.8$  Hz, 1H), 5.08 (ABd,  $J_1 = 9.6$  Hz,  $J_2 = 48.4$  Hz, 1H), 2.50 (br, 1H), 2.31-2.29 (m, 1H);  $^{13}C$  NMR (100 MHz, acetone- $d_6$ ):  $\delta$  176.36, 141.71, 135.32, 134.21, 133.99, 130.81, 129.70, 128.89, 128.57, 127.53, 127.32, 127.20, 126.26, 123.08, 111.16, 84.96 (d,  $^1J_{F-C} = 167.0$  Hz), 45.31 (d,  $^2J_{F-C} = 22.0$  Hz), 36.39, 27.64 (d,  $^3J_{F-C} = 7.0$  Hz);  $^{19}F$  NMR (376 MHz, acetone- $d_6$ ):  $\delta$  -216.79; IR (ATR): 3169, 3061, 1702, 1441, 1350, 1298, 1221, 1077; GC-MS: 351, 353 ( $M^+$ , 1, 1), 207 (100), 183 (44), 262 (33), 96 (30), 133 (29), 281 (16), 327 (4); HRMS (EI): Exact mass calcd for  $C_{21}H_{15}NOF^{35}Cl [M]^+$ : 351.0826, Found: 351.0825; Exact mass calcd for  $C_{21}H_{15}NOF^{37}Cl [M]^+$ : 353.0797, Found: 357.0799.

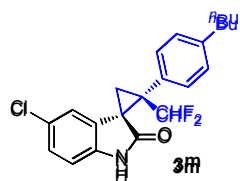

Column chromatography (5% acetone in  $CH_2Cl_2$ ) afforded product **3m** in 46% yield as white solid (m. p. 140-142 °C).  $^1H$  NMR analysis revealed that the dr is above

20:1. HPLC analysis (Chiralcel AD-H,  $iPrOH$ /hexane = 10/90, 1.0 mL/min, 230 nm; major diastereomer:  $t_r$  (minor) = 5.34 min,  $t_r$  (major) = 8.19 min) gave the isomeric

composition of the product: 90% ee,  $[\alpha]_D^{25} = +23.2$  ( $c = 1.00$ , acetone);  $^1H$  NMR (400 MHz, acetone- $d_6$ ):  $\delta$  9.92 (s, br, 1H), 7.50 (ABd,  $J = 7.6$  Hz, 1H), 7.36 (ABd,  $J = 7.2$  Hz, 1H), 7.14-7.11 (m, 1H), 7.09 (ABd,  $J = 7.2$  Hz, 1H), 6.98-6.96 (m, 1H), 6.82 (ABd,  $J = 7.6$  Hz, 1H), 6.74 (dd,  $J_1 = 56.4$  Hz,  $J_2 = 54.8$  Hz, 1H), 5.40 (d,  $J = 5.0$  Hz, 1H), 2.68-2.64 (m, 2H), 2.44-2.39 (m, 2H), 1.66-1.58 (m, 2H), 1.39-1.32 (m, 2H), 0.92 (t,  $J = 7.6$  Hz, 3H);  $^{13}C$  NMR (100 MHz, acetone- $d_6$ ):  $\delta$  176.11, 144.49, 141.76, 134.06, 132.30, 129.77, 129.47, 128.97, 128.90, 128.01, 126.61, 123.66, 115.81 (dd,  $^1J_{F-C} = 237.0$  Hz,  $^1J_{F-C} = 234.0$  Hz), 111.41, 44.86 (dd,  $^2J_{F-C} = 30.2$  Hz,  $^2J_{F-C} = 25.0$  Hz), 36.16 (d,  $^3J_{F-C} = 5.0$  Hz), 35.92, 34.47, 26.60 (d,  $^3J_{F-C} = 8.0$  Hz), 22.77, 14.29;  $^{19}F$  NMR (376 MHz, acetone- $d_6$ ):  $\delta$  -114.93 (ABd,  $J = 285.8$  Hz, 1F), -121.46 (ABd,  $J = 285.8$  Hz, 1F); IR (ATR): 3208, 2927, 1710, 1618, 1478, 1221, 1141, 1091, 1042; GC-MS: 375, 377 ( $M^+$ , 11, 4), 207 (100), 133 (43), 281 (33), 292 (32), 355 (29), 335 (22), 253 (22);

HRMS (EI): Exact mass calcd for C<sub>21</sub>H<sub>20</sub>NOF<sub>2</sub><sup>35</sup>Cl [M]<sup>+</sup>: 375.1201, Found: 375.1199; Exact mass calcd for C<sub>21</sub>H<sub>20</sub>NOF<sub>2</sub><sup>37</sup>Cl [M]<sup>+</sup>: 377.1172, Found: 377.1177.

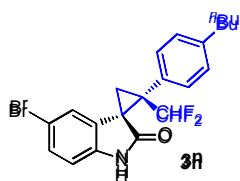

Column chromatography (5% acetone in CH<sub>2</sub>Cl<sub>2</sub>) afforded product **3n** in 53% yield as white solid (m. p. 149-151 °C). <sup>1</sup>H NMR analysis revealed that the dr is above 20:1. HPLC analysis (Chiralcel AD-H, <sup>i</sup>PrOH/hexane = 10/90, 1.0 mL/min, 230 nm; major diastereomer: t<sub>r</sub>(minor) = 5.24 min, t<sub>r</sub>(major) = 8.05 min) gave the isomeric

composition of the product: 91% ee, [α]<sub>D</sub><sup>25</sup> = -3.7 (c = 1.44, acetone); <sup>1</sup>H NMR (400 MHz, acetone-d<sub>6</sub>): δ 9.93 (s, br, 1H), 7.49 (ABd, *J* = 7.2 Hz, 1H), 7.35 (ABd, *J* = 7.2 Hz, 1H), 7.28-7.25 (m, 1H), 7.08 (ABd, *J* = 7.6 Hz, 1H), 6.93-6.91 (m, 1H), 6.81 (ABd, *J* = 6.8 Hz, 1H), 6.74 (dd, *J*<sub>1</sub> = 56.4 Hz, *J*<sub>2</sub> = 55.2 Hz, 1H), 5.53 (d, *J* = 2.0 Hz, 1H), 2.67-2.64 (m, 2H), 2.42-2.39 (m, 2H), 1.67-1.61 (m, 2H), 1.59-1.32 (m, 2H), 0.92 (t, *J* = 7.6 Hz, 3H); <sup>13</sup>C NMR (100 MHz, acetone-d<sub>6</sub>): δ 175.97, 144.51, 142.18, 134.07, 132.29, 130.89, 130.11, 129.46, 128.94, 128.88, 126.48, 115.80 (dd, <sup>1</sup>*J*<sub>F-C</sub> = 238.0 Hz, <sup>2</sup>*J*<sub>F-C</sub> = 235.0 Hz), 113.87, 113.43, 111.91, 44.86 (dd, <sup>2</sup>*J*<sub>F-C</sub> = 30.0 Hz, <sup>2</sup>*J*<sub>F-C</sub> = 25.0 Hz), 36.07 (d, <sup>3</sup>*J*<sub>F-C</sub> = 6.0 Hz), 35.95, 26.62 (d, <sup>3</sup>*J*<sub>F-C</sub> = 8.0 Hz), 22.83, 14.33; <sup>19</sup>F NMR (376 MHz, acetone-d<sub>6</sub>): δ -114.94 (ABd, *J* = 285.76 Hz, 1F), -121.45 (ABd, *J* = 285.76 Hz, 1F); IR (ATR): 3191, 2921, 1705, 1615, 1342, 1224, 1088, 1038; MS (EI): 419, 421 (M<sup>+</sup>, 50, 50), 399 (100), 401 (98), 356 (57), 358 (57), 381 (51), 342 (48), 344 (43); HRMS (EI): Exact mass calcd for C<sub>21</sub>H<sub>20</sub>NOF<sub>2</sub><sup>79</sup>Br [M]<sup>+</sup>: 419.0696, Found: 419.0692; Exact mass calcd for C<sub>21</sub>H<sub>20</sub>NOF<sub>2</sub><sup>81</sup>Br [M]<sup>+</sup>: 421.0676, Found: 421.0677.

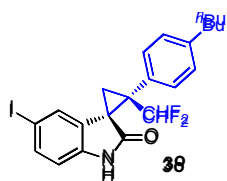

Column chromatography (5% acetone in CH<sub>2</sub>Cl<sub>2</sub>) afforded product **3o** in 41% yield as white solid (m. p. 165-167 °C). <sup>1</sup>H NMR analysis revealed that the dr is above 20:1. HPLC analysis (Chiralcel AD-H, <sup>i</sup>PrOH/hexane = 10/90, 1.0 mL/min, 230 nm; major diastereomer: t<sub>r</sub>(minor) = 7.72 min, t<sub>r</sub>(major) = 14.57 min) gave the isomeric

composition of the product: 89% ee, [α]<sub>D</sub><sup>25</sup> = -37.8 (c = 1.39, acetone); <sup>1</sup>H NMR (400 MHz, acetone-d<sub>6</sub>): δ 9.90 (s, br, 1H), 7.48 (ABd, *J* = 6.8 Hz, 1H), 7.46-7.44 (m, 1H), 7.35 (ABd, *J* = 6.4 Hz, 1H), 7.09 (ABd, *J* = 6.4 Hz, 1H), 6.83-6.81 (m, 2H), 6.73 (dd, *J*<sub>1</sub> = 56.4 Hz, *J*<sub>2</sub> = 55.2 Hz, 1H), 5.71 (d, *J* = 1.6 Hz, 1H), 2.68-2.64 (m, 2H), 2.40-2.36 (m, 2H), 1.70-1.62 (m, 2H), 1.44-1.35 (m, 2H), 0.94 (t, *J* = 7.2 Hz, 3H); <sup>13</sup>C NMR (100 MHz, acetone-d<sub>6</sub>): δ 175.79, 144.53, 142.75, 136.90, 134.12, 132.32, 130.32, 129.40, 128.96, 128.82, 115.78 (dd, <sup>1</sup>*J*<sub>F-C</sub> = 238.0 Hz, <sup>1</sup>*J*<sub>F-C</sub> = 235.0 Hz), 112.43, 83.63, 44.83 (dd, <sup>2</sup>*J*<sub>F-C</sub> = 30.0 Hz, <sup>2</sup>*J*<sub>F-C</sub> = 24.9 Hz), 36.01, 34.61, 35.89 (d, <sup>3</sup>*J*<sub>F-C</sub> = 5.4 Hz), 26.59 (d, <sup>3</sup>*J*<sub>F-C</sub> = 8.0 Hz), 22.99, 14.38;



$^{19}\text{F}$  NMR (376 MHz, acetone- $d_6$ ):  $\delta$  -114.92 (ABd,  $J$  = 285.76 Hz, 1F), -121.43 (ABd,  $J$  = 285.76 Hz, 1F); IR (ATR): 3250, 2926, 1713, 1614, 1474, 1338, 1222, 1141, 1089, 1037; MS (EI): 467 ( $\text{M}^+$ , 54), 447 (100), 404 (48), 427 (44), 390 (40), 384 (27), 264 (23), 448 (23); HRMS (EI): Exact mass calcd for  $\text{C}_{21}\text{H}_{20}\text{NOF}_2[\text{M}]^+$ : 467.0558, Found: 467.0555.

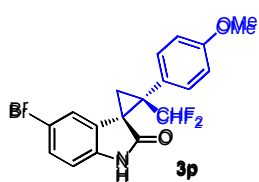

Column chromatography (5% acetone in  $\text{CH}_2\text{Cl}_2$ ) afforded product **3p** in 54% yield as white solid (m. p. 103-105  $^\circ\text{C}$ ).  $^1\text{H}$  NMR analysis revealed that the dr is above 20:1. HPLC analysis (Chiralcel AD-H,  $i$ PrOH/hexane = 10/90, 1.0 mL/min, 230 nm; major diastereomer:  $t_r$ (minor) = 8.34 min,  $t_r$ (major) = 12.93 min) gave

the isomeric composition of the product: 91% ee,  $[\alpha]_D^{25} = -23.1$  ( $c$  = 0.83, acetone);  $^1\text{H}$  NMR (400 MHz, acetone- $d_6$ ):  $\delta$  9.90 (s, br, 1H), 7.51 (ABd,  $J$  = 7.6 Hz, 1H), 7.29-7.26 (m, 1H), 7.06 (ABd,  $J$  = 7.2 Hz, 1H), 6.94-6.92 (m, 1H), 6.82 (m, 2H), 6.72 (dd,  $J_1$  = 56.4 Hz,  $J_2$  = 54.8 Hz, 1H), 5.63 (d,  $J$  = 5.0 Hz, 1H), 3.83 (s, 3H), 2.41-2.36 (m, 2H);  $^{13}\text{C}$  NMR (100 MHz, acetone- $d_6$ ):  $\delta$  176.01, 161.18, 142.23, 135.27, 133.65, 130.90, 130.16, 126.57, 123.47, 115.76 (dd,  $^1J_{\text{F-C}}$  = 237.0 Hz,  $^1J_{\text{F-C}}$  = 235.0 Hz), 114.64 (d,  $^3J_{\text{F-C}}$  = 7.0 Hz), 111.93, 55.80, 44.58 (dd,  $^2J_{\text{F-C}}$  = 30.0 Hz,  $^2J_{\text{F-C}}$  = 25.2 Hz), 36.26 (d,  $^3J_{\text{F-C}}$  = 5.0 Hz), 26.77 (d,  $^3J_{\text{F-C}}$  = 8.0 Hz);  $^{19}\text{F}$  NMR (376 MHz, acetone- $d_6$ ):  $\delta$  -115.05 (ABd,  $J$  = 285.76 Hz, 1F), -121.61 (ABd,  $J$  = 285.76 Hz, 1F); IR (ATR): 3273, 2841, 1706, 1611, 1514, 1476, 1294, 1220, 1177, 1141, 1091, 1030; MS (EI): 393, 395 ( $\text{M}^+$ , 26, 26), 373 (100), 375 (91), 43 (90), 44 (54), 59 (46), 355 (38), 353 (36); HRMS (EI): Exact mass calcd for  $\text{C}_{18}\text{H}_{14}\text{NO}_2\text{F}_2^{79}\text{Br}[\text{M}]^+$ : 393.0176, Found: 393.0179; Exact mass calcd for  $\text{C}_{18}\text{H}_{14}\text{NO}_2\text{F}_2^{81}\text{Br}[\text{M}]^+$ : 395.0156, Found: 395.0158.

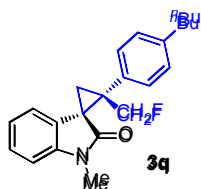

Column chromatography (20%  $\text{Et}_2\text{O}$  in petroleum ether) afforded product **3q** in 40% yield as red oil.  $^1\text{H}$  NMR analysis revealed that the dr is above 20:1. HPLC analysis (Chiralcel AD-H,  $i$ PrOH/hexane = 10/90, 1.0 mL/min, 230 nm; major diastereomer:  $t_r$ (minor) = 5.12 min,  $t_r$ (major) = 6.44 min) gave the isomeric composition of the

product: 80% ee,  $[\alpha]_D^{25} = +30.3$  ( $c$  = 1.05, acetone);  $^1\text{H}$  NMR (300 MHz, acetone- $d_6$ ):  $\delta$  7.17-7.11 (m, br, 5H), 6.98-6.96 (m, 1H), 6.59-6.653 (m, 1H), 5.55-5.53 (m, 1H), 5.24 (ABd,  $J_1$  = 12.8 Hz,  $J_2$  = 46.8 Hz, 1H), 5.00 (ABd,  $J_1$  = 12.8 Hz,  $J_2$  = 48.3 Hz, 1H), 3.28 (s, 3H), 2.62-2.59 (m, 2H), 2.23-2.20 (m, 1H), 2.15-2.13 (m, 1H), 1.64-1.54 (m, 2H), 1.40-1.27 (m, 2H), 0.92 (t,  $J$  = 9.6 Hz, 3H);  $^{13}\text{C}$  NMR (75 MHz, acetone- $d_6$ ):  $\delta$  175.09, 144.78, 143.28, 135.32, 131.66, 129.14, 128.13, 127.75, 122.63, 121.65, 108.62, 85.12 (d,  $^1J_{\text{F-C}}$  = 167 Hz), 44.26 (d,  $^2J_{\text{F-C}}$  = 22.5 Hz), 35.86, 35.78, 34.43, 27.30 (d,  $^3J_{\text{F-C}}$  = 6.8 Hz), 26.74

(d,  $^4J_{F-C} = 2.2$  Hz), 22.86, 14.26;  $^{19}F$  NMR (282 MHz, acetone- $d_6$ ):  $\delta$  -216.78; IR (ATR): 3203, 2928, 1697, 1620, 1469, 1358, 1218; GC-MS: 337 ( $M^+$ , 26), 146 (100), 317 (22), 91 (15), 207 (11), 260 (10), 274 (5), 184 (2); HRMS (EI): Exact mass calcd for  $C_{22}H_{24}NOF [M]^+$ : 337.1842, Found: 337.1844.

### Part III General procedure for Rh(II) catalyzed stereoselective cyclopropanation of aryl diazoacetate and experimental data for products **7**

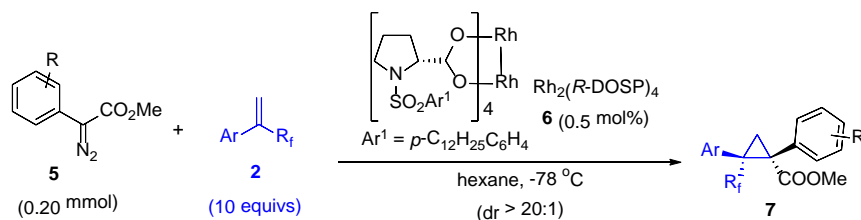

All the racemic compounds were prepared using 0.5 mol% of  $Rh_2(OAc)_4$  as catalyst in  $CH_2Cl_2$  at room temperature.

The synthesis of products **7a-7d** were carried out at  $-78$  °C: under  $N_2$  atmosphere, to an over-dried Schlenk tube were added  $Rh_2(R-DOSP)_4$  **6** (1.9 mg, 0.0010 mmol, 0.5 mol%), followed by 1.0 mL of anhydrous *n*-hexane and alkene **2** (10.0 equivs). After the solution was stirred at  $-78$  °C for 0.5 hour, an *n*-hexane solution of diazo acetate **5** (0.2 mmol, 0.1 M) was added via syringe over half an hour. The resulting mixture was stirred at  $-78$  °C till almost full conversion of **5** by TLC analysis and diluted with brine, extracted with EtOAc three times ( $3 \times 5$  mL). The organic layer was dried by  $Na_2SO_4$ , concentrated in vacuum. To determine the diastereoselectivity of product, the residue was first dissolved in acetone- $d_6$ , and took some samples for NMR analysis. Then the sample for analysis and the rest of the product were recombined for column chromatographic purification using the indicated solvent mixtures to afford the desired products.

Procedure for the synthesis of product **7e** were the same as the above except the reaction was running at room temperature.

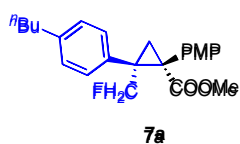

Column chromatography (5% petroleum ether in ethyl acetate) afforded product **7a** in 60% yield as colorless oil.  $^1H$  NMR analysis revealed that the dr is above 20:1.

HPLC analysis (Chiralcel OZ-H, *i*PrOH/hexane = 1/99, 0.8 mL/min, 230 nm; major diastereomer:  $t_r$  (minor) = 15.46 min,  $t_r$  (major) = 16.80 min) gave the isomeric composition of the product: 93% ee,  $[\alpha]_D^{25} = -20.4$  ( $c = 1.68$ , acetone);  $^1H$  NMR (400 MHz,  $CDCl_3$ ):  $\delta$  7.09-7.03 (m, 4H),



6.91 (ABd,  $J = 8.0$  Hz, 2H), 6.60-6.57 (m, 2H), 4.96-4.90 (m, 1H), 4.84-4.78 (m, 1H), 3.70 (s, 3H), 3.67 (s, 3H), 2.46 (t,  $J = 7.6$  Hz, 2H), 2.18-2.17 (m, 1H), 2.11-2.08 (m, 1H), 1.52-1.44 (m, 2H), 1.28-1.18 (m, 2H), 0.86 (t,  $J = 7.2$  Hz, 3H);  $^{13}\text{C}$  NMR (100 MHz,  $\text{CDCl}_3$ ):  $\delta$  172.12, 158.33, 141.44, 134.39, 132.57, 128.53, 127.92, 127.39, 112.77, 87.49 (d,  $^1J_{\text{F-C}} = 170.0$  Hz), 55.01, 52.76, 39.82 (d,  $^3J_{\text{F-C}} = 5.2$  Hz), 38.61 (d,  $^2J_{\text{F-C}} = 20.8$  Hz), 35.00, 33.27, 22.11, 21.14 (d,  $^3J_{\text{F-C}} = 8.0$  Hz), 13.87;  $^{19}\text{F}$  NMR (376 MHz,  $\text{CDCl}_3$ ):  $\delta$  -210.07; IR (ATR): 2955, 1718, 1600, 1514, 1436, 1248, 1209, 1163, 1132, 1032; GC-MS: 370 ( $\text{M}^+$ , 20), 291 (100), 235 (77), 220 (37), 203 (21), 318 (15), 277 (14), 335 (5); HRMS (EI): Exact mass calcd for  $\text{C}_{23}\text{H}_{27}\text{O}_3\text{F}[\text{M}]^+$ : 370.1944, Found: 370.1945.

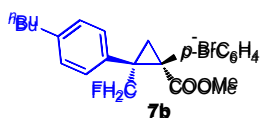

Column chromatography (2% petroleum ether in ethyl acetate) afforded product **7b** in 78% yield as colorless oil.  $^1\text{H}$  NMR analysis revealed that the dr is above 20:1. HPLC analysis (Chiralcel OZ-H,  $i\text{PrOH}$ /hexane = 1/99, 0.8 mL/min, 230 nm;

major diastereomer:  $t_r$ (minor) = 8.25 min,  $t_r$ (major) = 8.57 min) gave the isomeric composition of the product: 92% ee,  $[\alpha]_D^{25} = -24.1$  ( $c = 0.60$ , acetone);  $^1\text{H}$  NMR (400 MHz,  $\text{CDCl}_3$ ):  $\delta$  7.17 (ABd,  $J = 8.4$  Hz, 2H), 7.02-6.93 (m, 4H), 6.92 (ABd,  $J = 8.4$  Hz, 2H), 4.90 (ABd,  $J_1 = 9.6$  Hz,  $J_2 = 47.6$  Hz, 1H), 4.85 (ABd,  $J_1 = 9.8$  Hz,  $J_2 = 47.6$  Hz, 1H), 3.70 (s, 3H), 2.48 (t,  $J = 8.4$  Hz, 2H), 2.22-2.21 (m, 1H), 2.13-2.10 (m, 1H), 1.52-1.45 (m, 2H), 1.29-1.18 (m, 2H), 0.88 (t,  $J = 7.2$  Hz, 3H);  $^{13}\text{C}$  NMR (100 MHz,  $\text{CDCl}_3$ ):  $\delta$  171.33, 141.85, 134.52, 133.94, 133.23, 130.49, 128.40 (d,  $^4J_{\text{F-C}} = 1.0$  Hz), 128.13, 121.10, 87.21 (d,  $^1J_{\text{F-C}} = 170.0$  Hz), 52.86, 39.84 (d,  $^3J_{\text{F-C}} = 5.0$  Hz), 38.87 (d,  $^2J_{\text{F-C}} = 21$  Hz), 34.99, 33.22, 22.06, 21.05 (d,  $^3J_{\text{F-C}} = 8.0$  Hz), 13.90;  $^{19}\text{F}$  NMR (376 MHz,  $\text{CDCl}_3$ ):  $\delta$  -210.06; IR (ATR): 2928, 1719, 1435, 1258, 1208, 1133, 1074, 1043, 1010; GC-MS: 418, 420 ( $\text{M}^+$ , 2, 3), 207 (100), 260 (34), 281 (22), 187 (14), 341 (7), 400 (4), 361 (1); HRMS (EI): Exact mass calcd for  $\text{C}_{22}\text{H}_{24}\text{O}_2\text{F}^{79}\text{Br}[\text{M}]^+$ : 418.0944, Found: 418.0945; Exact mass calcd for  $\text{C}_{22}\text{H}_{24}\text{O}_2\text{F}^{81}\text{Br}[\text{M}]^+$ : 420.0923, Found: 420.0925.

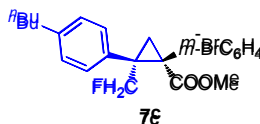

Column chromatography (2% petroleum ether in ethyl acetate) afforded product **7c** in 66% yield as colorless oil.  $^1\text{H}$  NMR analysis revealed that the dr is above 20:1. HPLC analysis (Chiralcel OZ-H,  $i\text{PrOH}$ /hexane = 1/99, 0.8 mL/min, 230 nm;

major diastereomer:  $t_r$ (minor) = 8.85 min,  $t_r$ (major) = 9.67 min) gave the isomeric composition of the product: 91% ee,  $[\alpha]_D^{25} = -7.9$  ( $c = 1.61$ , acetone);  $^1\text{H}$  NMR (400 MHz,  $\text{CDCl}_3$ ):  $\delta$  7.30-7.29 (m, 1H), 7.16-7.14 (m, 1H), 7.08-7.03 (m, 3H), 6.94-6.88 (m, 3H), 4.92 (ABd,  $J_1 = 10.0$  Hz,  $J_2 = 48.0$  Hz, 1H), 4.86 (ABd,  $J_1 = 9.6$  Hz,  $J_2 = 47.6$  Hz, 1H), 3.71 (s, 3H), 2.47 (t,  $J = 7.6$  Hz, 2H), 2.23-2.21 (m, 1H), 2.17-2.12 (m, 1H), 1.52-1.44 (m, 2H), 1.27-1.19 (m, 2H), 0.87 (t,  $J = 7.2$  Hz, 3H);  $^{13}\text{C}$  NMR (100 MHz,

CDCl<sub>3</sub>):  $\delta$  171.24, 141.89, 137.71, 134.64, 133.83, 130.26, 129.98, 128.75, 128.38 (d,  $^4J_{F-C} = 2.0$  Hz), 128.08, 121.21, 87.14 (d,  $^1J_{F-C} = 170.0$  Hz), 52.91, 39.93 (d,  $^3J_{F-C} = 5.5$  Hz), 38.92 (d,  $^2J_{F-C} = 20.8$  Hz), 35.00, 33.28, 22.06, 21.11 (d,  $^3J_{F-C} = 8.0$  Hz), 13.88;  $^{19}\text{F}$  NMR (376 MHz, CDCl<sub>3</sub>):  $\delta$  -210.08; IR (ATR): 2928, 1723, 1433, 1256, 1208; GC-MS: 418, 420 (M<sup>+</sup>, 10, 10), 260 (100), 217 (53), 341 (31), 287 (31), 204 (31), 367 (7), 297 (7); HRMS (EI): Exact mass calcd for C<sub>22</sub>H<sub>24</sub>O<sub>2</sub>F<sup>79</sup>Br [M]<sup>+</sup>: 418.0944, Found: 418.0941; Exact mass calcd for C<sub>22</sub>H<sub>24</sub>O<sub>2</sub>F<sup>81</sup>Br [M]<sup>+</sup>: 420.0923, Found: 420.0920.

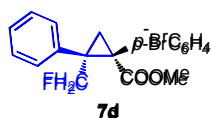

Column chromatography (1% petroleum ether in ethyl acetate) afforded product **7d** in 79% yield as white solid (M. P. 35 °C).  $^1\text{H}$  NMR analysis revealed that the dr is above 20:1. HPLC analysis (Chiralcel OD-H, *i*PrOH/hexane = 1/99, 0.8 mL/min, 230 nm; major diastereomer:  $t_r$  (major) = 14.68 min,  $t_r$  (minor) = 18.69 min) gave the isomeric composition of the product: 95% ee,  $[\alpha]_D^{25} = -19.8$  (c = 4.15, acetone);  $^1\text{H}$  NMR (400 MHz, CDCl<sub>3</sub>):  $\delta$  7.20-7.04 (m, 9H), 4.91 (ABd,  $J_1 = 10.0$  Hz,  $J_2 = 48.0$  Hz, 1H), 4.87 (ABd,  $J_1 = 10.0$  Hz,  $J_2 = 48.0$  Hz, 1H), 3.71 (s, 3H), 2.25-2.24 (m, 1H), 2.17-2.14 (m, 1H);  $^{13}\text{C}$  NMR (100 MHz, CDCl<sub>3</sub>):  $\delta$  171.20, 136.84, 134.30, 133.15, 130.56, 128.62 (d,  $^4J_{F-C} = 1.0$  Hz), 128.08, 127.25, 121.21, 87.14 (d,  $^1J_{F-C} = 171.0$  Hz), 52.90, 39.85 (d,  $^3J_{F-C} = 6.0$  Hz), 39.06 (d,  $^2J_{F-C} = 20.0$  Hz), 20.97 (d,  $^3J_{F-C} = 8.0$  Hz);  $^{19}\text{F}$  NMR (376 MHz, CDCl<sub>3</sub>):  $\delta$  -210.14; IR (ATR): 2925, 1718, 1430, 1258, 1207, 1071, 1008; GC-MS: 362, 364 (M<sup>+</sup>, 9, 9), 204 (100), 237 (17), 191 (15), 283 (8), 248 (7), 344 (4), 312 (2); HRMS (EI): Exact mass calcd for C<sub>18</sub>H<sub>16</sub>O<sub>2</sub>F<sup>79</sup>Br [M]<sup>+</sup>: 362.0318, Found: 362.0320; Exact mass calcd for C<sub>18</sub>H<sub>16</sub>O<sub>2</sub>F<sup>81</sup>Br [M]<sup>+</sup>: 364.0297, Found: 364.0294.

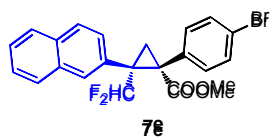

Column chromatography (5% petroleum ether in ethyl acetate) afforded product **7e** in 51% yield as yellow oil.  $^1\text{H}$  NMR analysis revealed that the dr is above 20:1. HPLC analysis (Chiralcel OD-H, *i*PrOH/hexane = 1/99, 1.0 mL/min, 230 nm; major diastereomer:  $t_r$  (major) = 12.91 min,  $t_r$  (minor) = 13.80 min) gave the isomeric composition of the product: 87% ee,  $[\alpha]_D^{25} = +54.4$  (c = 0.50, acetone);  $^1\text{H}$  NMR (400 MHz, CDCl<sub>3</sub>):  $\delta$  7.73-7.69 (m, 2H), 7.66-7.64 (m, 2H), 7.45-7.41 (m, 3H), 7.16 (s, 4H), 6.23 (t,  $J = 16.0$  Hz, 1H), 3.76 (s, 3H), 2.46-2.44 (m, 1H), 2.35-2.32 (m, 1H);  $^{13}\text{C}$  NMR (125 MHz, CDCl<sub>3</sub>):  $\delta$  170.73, 133.02, 132.80 (d,  $J = 4.8$  Hz), 132.59, 130.82, 130.10, 129.21 (d,  $J = 1.4$  Hz), 128.08 (d,  $J = 1.4$  Hz), 127.85, 127.66, 127.52, 126.35, 126.08, 121.75, 116.40 (d,  $J = 240$  Hz), 53.22, 41.21 (d,  $J = 25$  Hz), 41.00 (d,  $J = 237.5$  Hz), 39.33, 29.69, 19.40 (d,  $J = 6.2$  Hz);  $^{19}\text{F}$  NMR (376 MHz, CDCl<sub>3</sub>):  $\delta$  -111.30 (d,  $J = 286$  Hz, 1F), -118.00 (d,  $J = 286$  Hz, 1F);

IR (ATR): 2993, 1718, 1591, 1490, 1256, 1205, 1106, 1089, 1009; GC-MS: 431, 429 ( $M^+$ , 35, 34), 272 (100), 370 (85), 350 (70), 320 (44), 411 (42), 239 (42), 215 (21); HRMS (EI): Exact mass calcd for  $C_{22}H_{17}F_2O_2^{79}Br [M]^+$ : 430.0380, Found: 430.0380; Exact mass calcd for  $C_{22}H_{17}F_2O_2^{81}Br [M]^+$ : 432.0360, Found: 432.0362.

#### Part IV: Synthesis of product 4

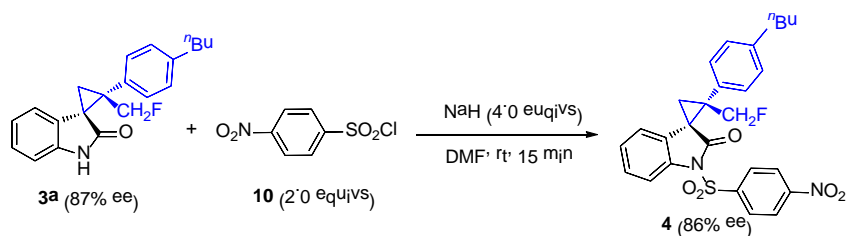

To a stirred solution of **3a** (180.0 mg, 0.56 mmol) in 3 mL DMF, NaH (89.6 mg, 60% in mineral oil, 4.0 equivs) was added in one portion and stirred at room temperature for 10 minutes. Then sulfonyl chloride **10** (248 mg, 1.12 mmol) was added and stirred for another 15 minutes. The reaction mixture was quenched with saturated  $NH_4Cl$  and extracted with ethyl acetate ( $3 \times 5$  mL). The organic layer was dried by  $Na_2SO_4$ , concentrated in vacuum. To determine the diastereoselectivity of product, the residue was first dissolved in acetone- $d_6$ , and took some samples for NMR analysis. Then the sample for analysis and the rest of the product were recombined for column chromatographic purification to afford the desired product **4** in 67% yield (m. p. 187-189 °C) as red solid.  $^1H$  NMR analysis revealed that the dr is above 20:1. HPLC analysis (Chiralcel AD-H,  $iPrOH$ /hexane = 20/80, 1.0 mL/min, 230 nm; major diastereomer:  $t_r$ (major) = 9.23 min,  $t_r$ (minor) = 14.11 min) gave the isomeric composition of the product: 86% ee,  $[\alpha]_D^{25} = 100.4$  ( $c = 0.88$ , acetone);  $^1H$  NMR (400 MHz, acetone- $d_6$ ): 8.52-8.50 (m, 2H), 8.43-8.40 (m, 2H), 7.94 (d,  $J = 8.0$  Hz, 1H), 7.28-7.24 (m, 1H), 7.13 (br, 4H), 6.76 (t,  $J = 7.6$  Hz, 1H), 5.66 (d,  $J = 7.6$  Hz, 1H), 5.02 (ABdd,  $J_1 = 9.8$  Hz,  $J_2 = 46.8$  Hz, 1H), 4.84 (ABdd,  $J_1 = 9.6$  Hz,  $J_2 = 48.0$  Hz, 1H), 2.60 (t,  $J = 7.6$  Hz, 2H), 2.36-2.34 (m, 1H), 2.28-2.26 (m, 1H), 1.60-1.53 (m, 2H), 1.35-1.28 (m, 2H), 0.90 (t,  $J = 7.2$  Hz, 3H);  $^{13}C$  NMR (100 MHz, acetone- $d_6$ ): 173.96, 152.30, 144.08, 143.81, 139.23, 133.76, 131.58, 130.38, 129.32, 128.49, 127.53, 125.51, 124.75, 123.36, 113.68, 84.72 (d,  $^1J_{F-C} = 169.0$  Hz), 47.66 (d,  $^2J_{F-C} = 21.0$  Hz), 36.49 (d,  $^3J_{F-C} = 5.1$  Hz), 35.81, 34.37, 28.71 (d,  $^3J_{F-C} = 8.0$  Hz), 22.81, 14.23;  $^{19}F$  NMR (376 MHz, acetone- $d_6$ ):  $\delta$  -215.88; IR (ATR): 2928, 1723, 1433, 1256, 1208; MS (EI): 508, ( $M^+$ , 16), 302 (100), 246 (33), 303 (28), 122 (24), 92 (22), 156 (21), 115 (18); HRMS (EI): Exact mass calcd for  $C_{27}H_{25}N_2O_5FS [M]^+$ : 508.1468, Found: 508.1465.

## Part V: Determining the solubility of **1a** in PhF and PhCl

The detail for measuring the solubility of **1a** in PhF and PhCl was described below. To **1a** (0.20 mmol, 31.8 mg) was added 4.0 mL of the corresponding PhF or PhCl, respectively. After stirring the reaction mixture at 0 °C for one hour, the solution kept still for another half an hour. And then 50 uL supernate was quickly taken and moved to the NMR tube containing 0.05 mmol trimethoxybenzene as internal standard. The procedure was repeated for three times. By this, the solubility of **1a** in PhF and PhCl was determined to be 5.6 and 6.4 mg/mL respectively.

## Part VI: Results of DFT Calculations and Discussion

We conducted density functional theory (DFT) calculations of the Au(I)-catalyzed cyclopropanation of diazooxindole **1a** and alkene **2a** by using Gaussian 09 software package.<sup>6</sup> Molecular geometries of the reactants, intermediates, transition states and products were optimized with M06-2X functionals.<sup>7</sup> The 6-311G(d) basis set was used for the other atoms (C, H, O, N, P, Cl, F) and LANL2DZ effective core potential for Au. All the stationary points were tested by the frequency calculation and the relative free energies ( $\Delta G$ ) with the zero-point energy (ZPE) corrections. The reaction paths connecting the related reactants and the transition geometries and products were confirmed by intrinsic reaction coordinate (IRC) calculations.

The formula of rate constants for calculation:

$$k \text{ (s}^{-1}\text{)} = k_b \times T \times \sigma \times \kappa / h \times \exp(-\Delta G^0 / (R/1000T)) \text{ (Formula s1)}$$

$\Delta G^0$ : The difference between  $G(T)$  of reactants and  $G(T)$  of transition state (TS) under a standard pressure

$k_b$  (J/K): Boltzmann constant

$T$  (K): 298

$\sigma$ : Reaction path degeneracy

$h$  (J\*s): Planck constant

$R$  (J/mol/K): Gas constant

$\kappa$ : Correction factor of tunnel effect,  $\kappa = 1 + (h/k_b/T \times F \times 3 \times 10^{10})^2 / 24$

$F$  ( $\text{cm}^{-1}$ ): Imaginary frequency size of transition state structure

In order to make sure that we choose the right calculation method, we first calculate the two crystal structures of catalyst precursor and product **4**. As shown in Figure 1, the calculated structures are in accordance with the experimental data, which indicates the used DFT method is suitable for calculation.

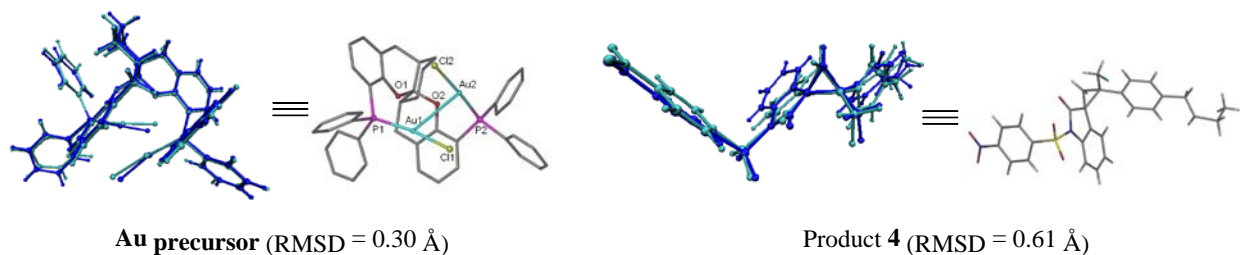

**Figure S1.** Comparison between the experimental crystal and calculated structures of catalyst precursor and **4**

(6) Frisch, M. J.; Trucks, G. W.; Schlegel, H. B.; Scuseria, G. E.; Robb, M. A.; Cheeseman, J. R.; Scalmani, G.; Barone, V.; Mennucci, B.; Petersson, G. A. et al. Gaussian 09, Revision B.01; Gaussian, Inc.: Wallingford CT, **2010**.

(7) (a) Zhao, Y.; Truhlar, D. G. *Theor. Chem. Acc.* **2008**, *120*, 215-241. (b) Zhao, Y.; Truhlar, D. G. *Acc. Chem. Res.* **2008**, *41*, 157-167.

We further optimized the structures of the key intermediates **IM<sub>2</sub>-Sol**. It is noticed that for each of them, two possible isomers were found (Figure S2), so only the two isomers with lower energy of **IM<sub>2</sub>-PhF** and **IM<sub>2</sub>-PhCl** was used for further investigation.

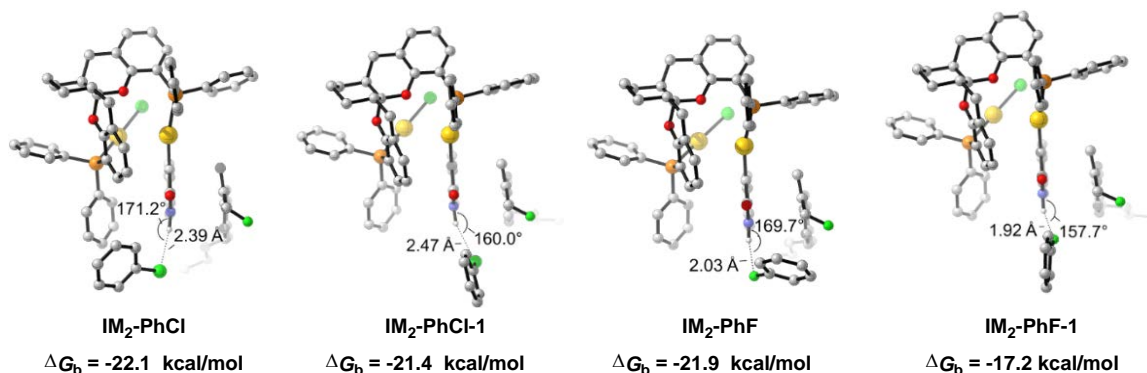

**Figure S2.** The isomers of **IM<sub>2</sub>-PhCl** and **IM<sub>2</sub>-PhF** using M06-2X/6-311G(d)

After this, we checked the presence of H-bonding interaction with solvent on the influence of the key intermediate **IM<sub>2</sub>**. As demonstrated below, first, it tunes the orientation of dipole moment (Figure S3), which directs straightly from Au atom to the more negatively charged C atom (the influence on charge distribution are described in Table S5).

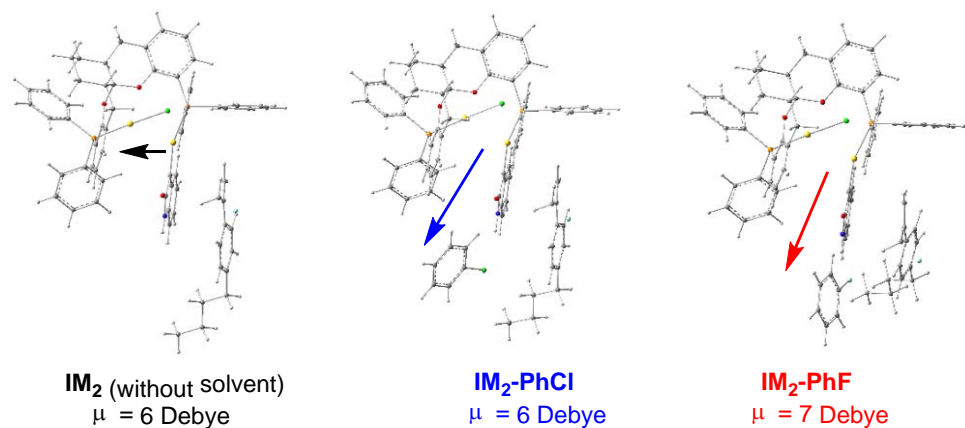

**Figure S3.** The dipole moments of reactants, **IM<sub>2</sub>**, **IM<sub>2</sub>-PhCl** and **IM<sub>2</sub>-PhF**

We also examined the low-frequency vibrational modes of **IM** (without solvent), **IM<sub>2</sub>-PhCl** and **IM<sub>2</sub>-PhF** in the simulated IR spectra (Figure S4). It was noticed, the low-frequency vibrations at about 600 cm<sup>-1</sup> of N-H vibrations and indole ring breath are depressed by H···Cl (H···F) interaction in gold carbenoid and PhCl (PhF), slightly lowering the entropy during the reaction. In contrast, at about 800 cm<sup>-1</sup>, the translation motion of indole ring towards the attacking of olefin (i.e. the motion along the reaction coordinate) is significantly promoted by H···Cl (H···F) interaction between gold carbenoid and

PhCl (PhF), especially for H...F interaction with the value of oscillator strength ( $f$ ) is 77 which is larger than that of H...Cl ( $f = 48$ ).

(a)

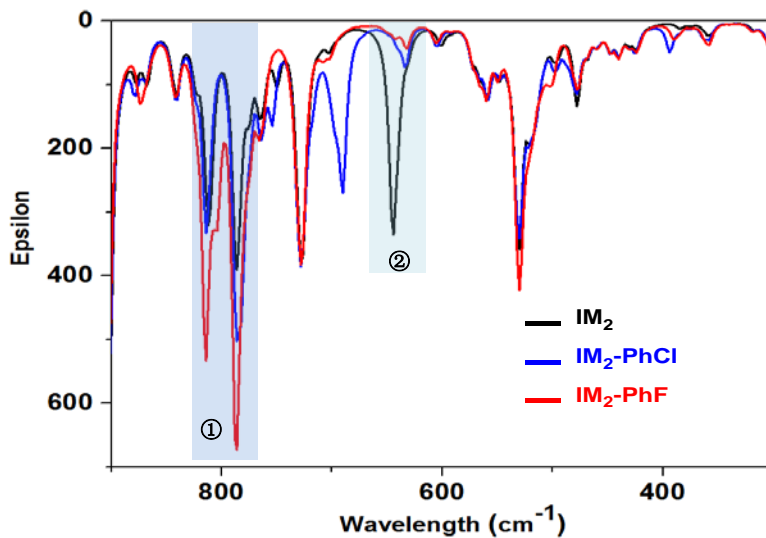

(b)

|   |                                                                                                                     |                                                                                                        |                                                                                                       |
|---|---------------------------------------------------------------------------------------------------------------------|--------------------------------------------------------------------------------------------------------|-------------------------------------------------------------------------------------------------------|
| ① | <p><b>IM<sub>2</sub> (without solvent)</b><br/><math>\nu_{148}</math> (813 cm<sup>-1</sup>) <math>f = 63</math></p> | <p><b>IM<sub>2</sub>-PhCl</b><br/><math>\nu_{163}</math> (813 cm<sup>-1</sup>) <math>f = 48</math></p> | <p><b>IM<sub>2</sub>-PhF</b><br/><math>\nu_{163}</math> (814 cm<sup>-1</sup>) <math>f = 77</math></p> |
| ② | <p><math>\nu_{116}</math> (645 cm<sup>-1</sup>) <math>f = 86</math></p>                                             | <p><math>\nu_{124}</math> (633 cm<sup>-1</sup>) <math>f = 18</math></p>                                | <p><math>\nu_{124}</math> (632 cm<sup>-1</sup>) <math>f = 10</math></p>                               |
|   | <p><math>\nu_{113}</math> (631 cm<sup>-1</sup>) <math>f = 8</math></p>                                              | <p><math>\nu_{123}</math> (605 cm<sup>-1</sup>) <math>f = 7</math></p>                                 | <p><math>\nu_{123}</math> (606 cm<sup>-1</sup>) <math>f = 6</math></p>                                |

**Figure S4.** The simulated IR spectra and vibrational modes of **IM<sub>2</sub>**, **IM<sub>2</sub>-PhF** and **IM<sub>2</sub>-PhCl** at the B3LYP/6-31G level.

Besides this, the influence of H-bonding interaction on the atomic charge distribution of Au atom and the adjacent carbon atom of the carbenoid was also calculated and the data was shown in Table S5.

**Table S5:** The atomic charges of Au and C of reactants, **IM<sub>2</sub>**, **TS<sub>2-3</sub>**, **IM<sub>2</sub>-Sol** and **TS<sub>2-3</sub>-Sol**

| Reactants/intermediates/transition states |                              | Charge (a.u.) |       |
|-------------------------------------------|------------------------------|---------------|-------|
|                                           |                              | Au            | C     |
| Reactants                                 | <b>1a</b>                    | -             | 0.05  |
|                                           | <b>1a</b> + PhCl             | -             | 0.16  |
|                                           | <b>1a</b> + PhF              | -             | 0.16  |
| Without solvent                           | <b>IM<sub>2</sub></b>        | -0.02         | -0.16 |
|                                           | <b>TS<sub>2-3</sub></b>      | -0.13         | -0.25 |
| PhCl as solvent                           | <b>IM<sub>2</sub>-PhCl</b>   | -0.02         | -0.17 |
|                                           | <b>TS<sub>2-3</sub>-PhCl</b> | -0.12         | -0.21 |
| PhF as solvent                            | <b>IM<sub>2</sub>-PhF</b>    | -0.04         | -0.16 |
|                                           | <b>TS<sub>2-3</sub>-PhF</b>  | -0.11         | -0.22 |

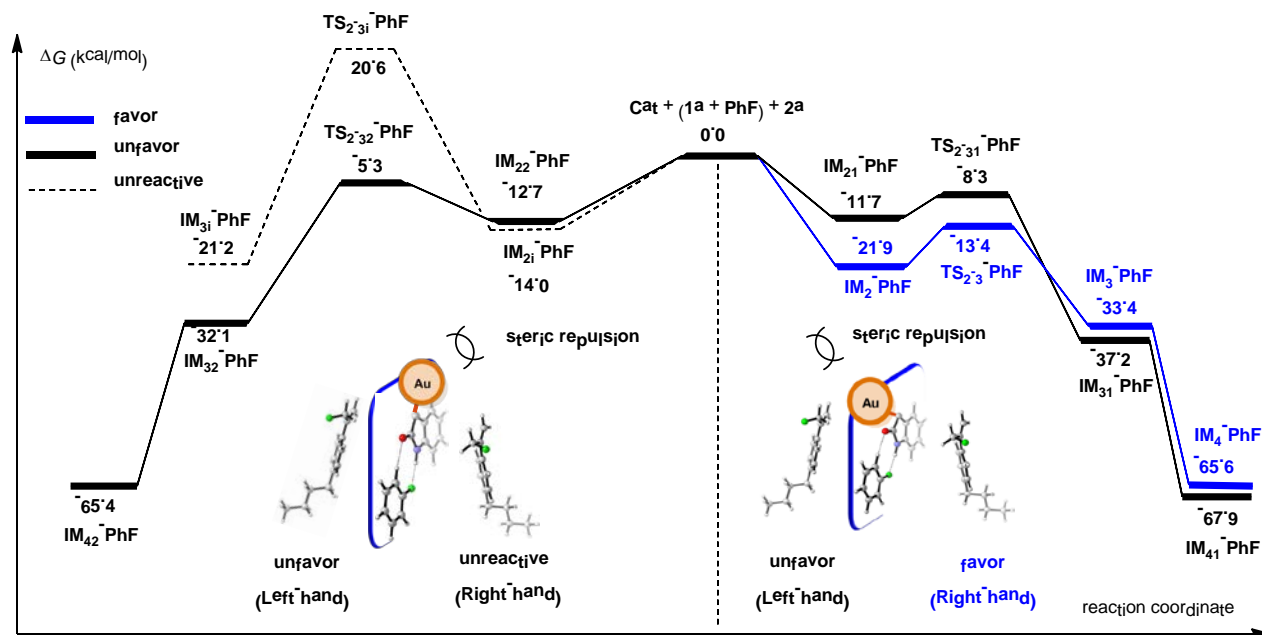

**Figure S5.** Free energy curves of the possible pathways using PhF as the solvent

For determining the stereo-determining step in PhF, we checked the possible reactions pathways. As presented in Figure S5, four possible pathways that working through intermediates **IM<sub>2</sub>-PhF**, **IM<sub>21</sub>-PhF**, **IM<sub>22</sub>-PhF**, and **IM<sub>2i</sub>-PhF**, respectively, were calculated to determine the stereo-determining step in PhF,



and the most favorable path (shown in blue) is benefited from the less steric repulsion in **IM<sub>2</sub>-PhF** with the right-hand attacking mode. The difference between **IM<sub>2</sub>-PhF/IM<sub>21</sub>-PhF** and **IM<sub>22</sub>-PhF/IM<sub>2i</sub>-PhF** lies in the different configurations of Au-carbenoid part relative to the molecular plane. The appropriate images of DFT optimized structures and transition states are provided in Figure S6.

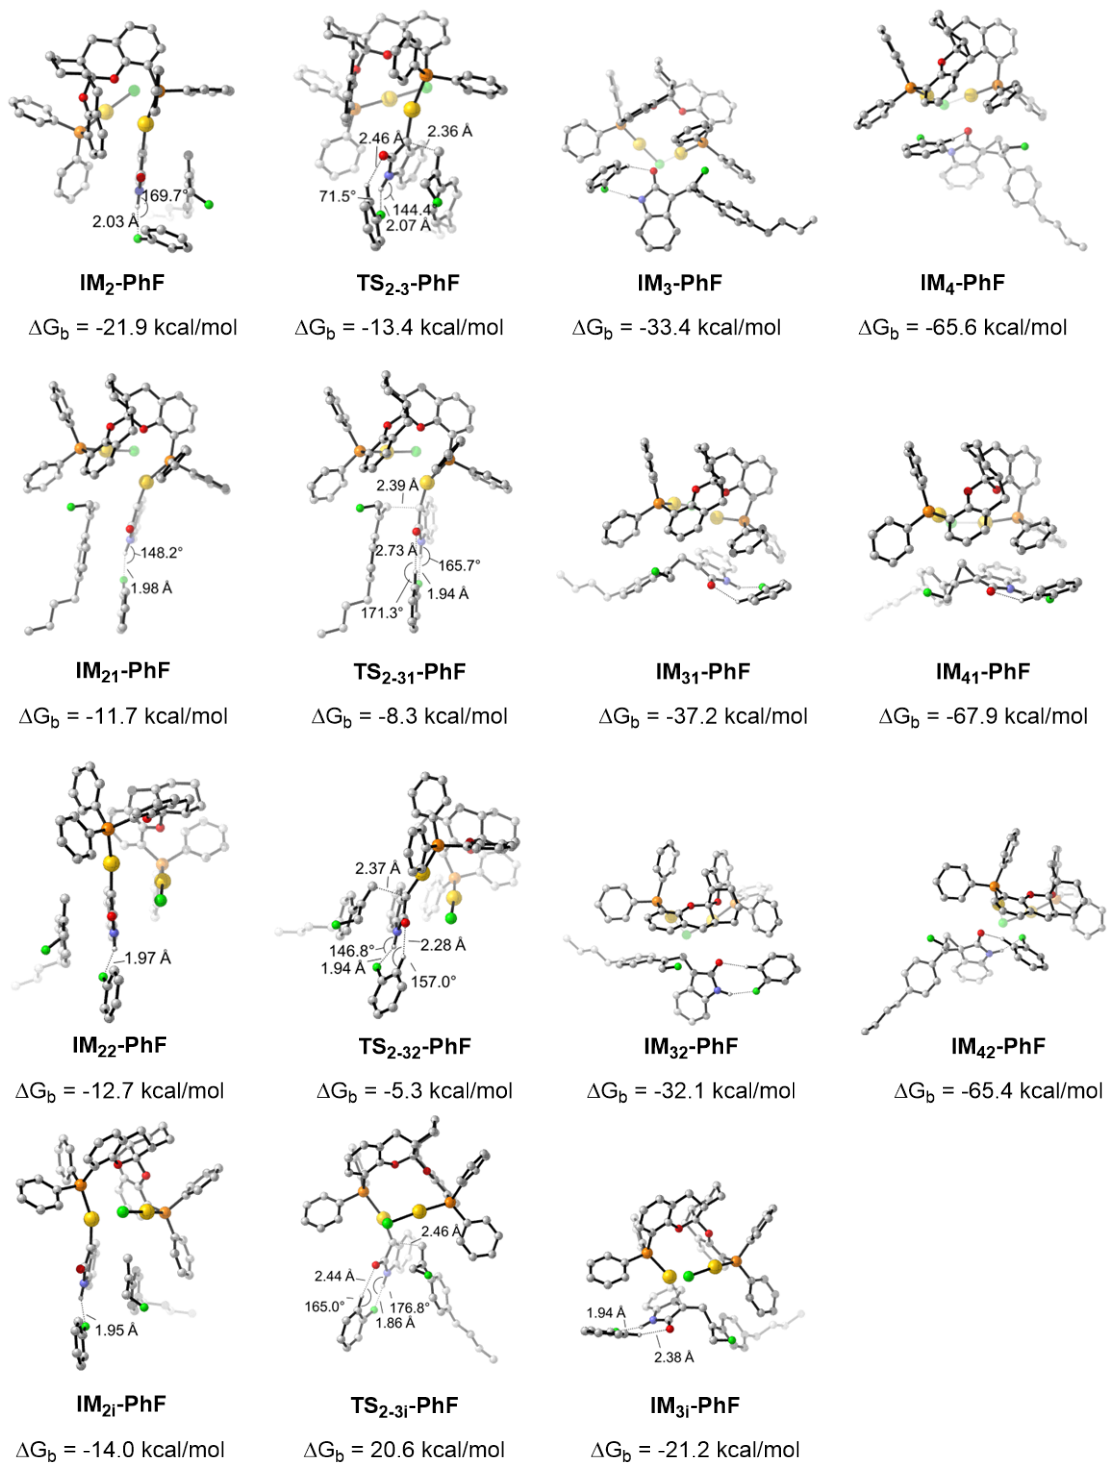

**Figure S6.** The appropriate images of DFT optimized structures and transition states

## Coordinates of DFT optimized structures and transition states shown in Figure S5.

### (1) Cat

|                                               |             |             |                             |
|-----------------------------------------------|-------------|-------------|-----------------------------|
| Zero-point correction =                       |             |             | 0.713564 (Hartree/Particle) |
| Thermal correction to Energy =                |             |             | 0.758118                    |
| Thermal correction to Enthalpy =              |             |             | 0.759063                    |
| Thermal correction to Gibbs Free Energy =     |             |             | 0.632606                    |
| Sum of electronic and zero-point Energies =   |             |             | -3262.489478                |
| Sum of electronic and thermal Energies =      |             |             | -3262.444924                |
| Sum of electronic and thermal Enthalpies =    |             |             | -3262.443979                |
| Sum of electronic and thermal Free Energies = |             |             | -3262.570436                |
| Au                                            | 1.76414300  | -1.51530400 | -0.77679000                 |
| Au                                            | -1.56584400 | -1.63812500 | -1.07194800                 |
| P                                             | 3.25943300  | -0.18340200 | 0.32290200                  |
| P                                             | -3.14528900 | -0.54315800 | 0.14797400                  |
| Cl                                            | 0.25077800  | -2.86292700 | -2.18622400                 |
| O                                             | -1.12296500 | 1.48959900  | 0.06737600                  |
| O                                             | 1.10162100  | 1.62919100  | -0.18473300                 |
| C                                             | 2.85530300  | 0.26746800  | 2.03119700                  |
| C                                             | 3.55988300  | 1.30540500  | 2.64939100                  |
| H                                             | 4.31639900  | 1.85589700  | 2.09764400                  |
| C                                             | 3.28360000  | 1.63477900  | 3.97001000                  |
| H                                             | 3.83044000  | 2.43664000  | 4.45248800                  |
| C                                             | 2.30425900  | 0.93353500  | 4.67143000                  |
| H                                             | 2.09387000  | 1.18812400  | 5.70428700                  |
| C                                             | 1.59772500  | -0.09122200 | 4.05252800                  |
| H                                             | 0.82716300  | -0.62766200 | 4.59351900                  |
| C                                             | 1.86805200  | -0.42445600 | 2.72935700                  |
| H                                             | 1.30710700  | -1.21476200 | 2.23980400                  |
| C                                             | 4.91929200  | -0.92478600 | 0.32380000                  |
| C                                             | 5.71543400  | -0.97962800 | 1.46703400                  |
| H                                             | 5.35483200  | -0.58464500 | 2.40950200                  |
| C                                             | 6.97687300  | -1.56492700 | 1.40277900                  |
| H                                             | 7.59057600  | -1.61137100 | 2.29467200                  |
| C                                             | 7.44496500  | -2.08919600 | 0.20497900                  |
| H                                             | 8.42730700  | -2.54463900 | 0.15920200                  |
| C                                             | 6.64864400  | -2.04068600 | -0.93714500                 |
| H                                             | 7.00733600  | -2.45860200 | -1.87037100                 |
| C                                             | 5.38661300  | -1.46871600 | -0.87825300                 |
| H                                             | 4.76250800  | -1.44610300 | -1.76750800                 |
| C                                             | -4.41323300 | -1.66269200 | 0.80783200                  |
| C                                             | -4.05291400 | -2.97878400 | 1.10879800                  |
| H                                             | -3.05062300 | -3.33422900 | 0.88912700                  |
| C                                             | -4.98060300 | -3.83766500 | 1.68405100                  |
| H                                             | -4.69977700 | -4.85877600 | 1.91355200                  |
| C                                             | -6.27037400 | -3.38976800 | 1.95089600                  |
| H                                             | -6.99603300 | -4.06402300 | 2.39075200                  |

|   |             |             |             |
|---|-------------|-------------|-------------|
| C | -6.63418700 | -2.08292500 | 1.64296300  |
| H | -7.64193000 | -1.73744000 | 1.84114900  |
| C | -5.70859000 | -1.21550600 | 1.07416600  |
| H | -6.00135500 | -0.20067000 | 0.82785400  |
| C | -4.00373800 | 0.81417000  | -0.70223900 |
| C | -4.47710200 | 1.90759800  | 0.02761000  |
| H | -4.31765300 | 1.95918400  | 1.10056400  |
| C | -5.14746000 | 2.93613900  | -0.62484400 |
| H | -5.51475600 | 3.78389800  | -0.05772900 |
| C | -5.34380600 | 2.87663400  | -2.00198400 |
| H | -5.86459100 | 3.68058600  | -2.50938500 |
| C | -4.87196200 | 1.78842700  | -2.72865000 |
| H | -5.02365400 | 1.74237500  | -3.80055400 |
| C | -4.20022900 | 0.75622100  | -2.08151300 |
| H | -3.82648300 | -0.08968800 | -2.65026400 |
| C | 3.39566200  | 1.36583700  | -0.61512900 |
| C | 2.20261600  | 2.06556100  | -0.86043700 |
| C | 2.16022800  | 3.10704000  | -1.78238600 |
| C | 3.35857800  | 3.50975300  | -2.37230300 |
| H | 3.33519300  | 4.32787600  | -3.08579400 |
| C | 4.56107800  | 2.88411200  | -2.07916700 |
| H | 5.48005500  | 3.22164400  | -2.54195900 |
| C | 4.57568200  | 1.79078300  | -1.21866600 |
| H | 5.50155300  | 1.25980900  | -1.02864600 |
| C | -2.37405800 | 0.22733000  | 1.60068400  |
| C | -1.39504900 | 1.20671900  | 1.37939300  |
| C | -0.80931900 | 1.88771900  | 2.44354100  |
| C | -1.21142000 | 1.55669700  | 3.73580100  |
| H | -0.76783700 | 2.09664900  | 4.56704000  |
| C | -2.15557000 | 0.56820200  | 3.97627300  |
| H | -2.45173000 | 0.32838300  | 4.99029800  |
| C | -2.74287100 | -0.09589200 | 2.90464700  |
| H | -3.49868700 | -0.85326300 | 3.07963300  |
| C | 0.19112000  | 2.97409500  | 2.15624200  |
| H | 1.20352800  | 2.56366400  | 2.21629600  |
| H | 0.11380100  | 3.76039900  | 2.91169600  |
| C | 0.83887800  | 3.72872800  | -2.15291400 |
| H | 0.78501400  | 4.74507700  | -1.75244400 |
| H | 0.78233400  | 3.82876400  | -3.24010100 |
| C | -0.09853700 | 2.40742700  | -0.25055600 |
| C | -0.06084800 | 3.55368200  | 0.76466800  |
| H | 0.77440900  | 4.20742400  | 0.49431600  |
| C | -1.37891500 | 4.34274300  | 0.68806100  |
| H | -1.31777800 | 5.19396500  | 1.37159400  |
| H | -2.19624200 | 3.71047900  | 1.05327300  |
| C | -1.71221400 | 4.81940600  | -0.72716200 |
| H | -2.70919400 | 5.26751100  | -0.73434100 |
| H | -1.02330500 | 5.61730200  | -1.02071400 |

|   |             |            |             |
|---|-------------|------------|-------------|
| C | -1.67082900 | 3.66922000 | -1.73785000 |
| H | -2.49263100 | 2.97893800 | -1.53631300 |
| H | -1.81647100 | 4.04866500 | -2.75334400 |
| C | -0.35249300 | 2.89055700 | -1.67453800 |
| H | -0.42196800 | 1.98649700 | -2.29136400 |

**(2) 2a**

|                                               |             |             |                             |
|-----------------------------------------------|-------------|-------------|-----------------------------|
| Zero-point correction =                       |             |             | 0.270531 (Hartree/Particle) |
| Thermal correction to Energy =                |             |             | 0.284867                    |
| Thermal correction to Enthalpy =              |             |             | 0.285811                    |
| Thermal correction to Gibbs Free Energy =     |             |             | 0.227565                    |
| Sum of electronic and zero-point Energies =   |             |             | -605.046074                 |
| Sum of electronic and thermal Energies =      |             |             | -605.031738                 |
| Sum of electronic and thermal Enthalpies =    |             |             | -605.030794                 |
| Sum of electronic and thermal Free Energies = |             |             | -605.089041                 |
| C                                             | -3.20466400 | 0.50765800  | 0.25671200                  |
| C                                             | -4.15528000 | -0.56896800 | -0.19295100                 |
| H                                             | -5.19077800 | -0.24603100 | -0.07340700                 |
| H                                             | -3.97229800 | -0.84999600 | -1.23320400                 |
| F                                             | -3.99098300 | -1.71927500 | 0.57407100                  |
| C                                             | -1.77003600 | 0.34849000  | -0.08813400                 |
| C                                             | -1.18551800 | -0.91987800 | -0.16299500                 |
| C                                             | -0.96969900 | 1.46115900  | -0.36587100                 |
| C                                             | 0.15877400  | -1.06101600 | -0.48283200                 |
| H                                             | -1.78234200 | -1.79891500 | 0.05011000                  |
| C                                             | 0.37203000  | 1.31179100  | -0.68514100                 |
| H                                             | -1.41172700 | 2.45189400  | -0.36186800                 |
| C                                             | 0.96056200  | 0.04817100  | -0.74685500                 |
| H                                             | 0.59419500  | -2.05512500 | -0.52922900                 |
| H                                             | 0.97125700  | 2.19008000  | -0.90854900                 |
| C                                             | -3.67211500 | 1.55478400  | 0.93628600                  |
| H                                             | -3.01759400 | 2.33513100  | 1.30826200                  |
| H                                             | -4.72888300 | 1.65493900  | 1.15881100                  |
| C                                             | 2.43059100  | -0.10907700 | -1.03659200                 |
| C                                             | 3.27457900  | -0.03561700 | 0.24155300                  |
| H                                             | 2.75903300  | 0.67062700  | -1.73182500                 |
| H                                             | 2.60900900  | -1.06870900 | -1.53275800                 |
| C                                             | 4.76662300  | -0.22108400 | -0.02005600                 |
| H                                             | 3.10098100  | 0.93015300  | 0.73058100                  |
| H                                             | 2.92416600  | -0.79928600 | 0.94554200                  |
| C                                             | 5.59535300  | -0.13936700 | 1.25864200                  |
| H                                             | 4.93037400  | -1.18972300 | -0.50525500                 |
| H                                             | 5.10845900  | 0.53896800  | -0.73147500                 |
| H                                             | 6.65938300  | -0.28101000 | 1.05963300                  |
| H                                             | 5.47304200  | 0.83308300  | 1.74269800                  |
| H                                             | 5.28537300  | -0.90488900 | 1.97470000                  |

**(3) N<sub>2</sub>**

|                                               |            |            |                             |
|-----------------------------------------------|------------|------------|-----------------------------|
| Zero-point correction =                       |            |            | 0.005738 (Hartree/Particle) |
| Thermal correction to Energy =                |            |            | 0.008098                    |
| Thermal correction to Enthalpy =              |            |            | 0.009043                    |
| Thermal correction to Gibbs Free Energy =     |            |            | -0.012685                   |
| Sum of electronic and zero-point Energies =   |            |            | -109.513390                 |
| Sum of electronic and thermal Energies =      |            |            | -109.511030                 |
| Sum of electronic and thermal Enthalpies =    |            |            | -109.510086                 |
| Sum of electronic and thermal Free Energies = |            |            | -109.531813                 |
| N                                             | 0.00000000 | 0.00000000 | 0.54496900                  |
| N                                             | 0.00000000 | 0.00000000 | -0.54496900                 |

**(4) 1a + PhF**

|                                               |             |             |                             |
|-----------------------------------------------|-------------|-------------|-----------------------------|
| Zero-point correction =                       |             |             | 0.215769 (Hartree/Particle) |
| Thermal correction to Energy =                |             |             | 0.231929                    |
| Thermal correction to Enthalpy =              |             |             | 0.232873                    |
| Thermal correction to Gibbs Free Energy =     |             |             | 0.166568                    |
| Sum of electronic and zero-point Energies =   |             |             | -878.444528                 |
| Sum of electronic and thermal Energies =      |             |             | -878.428369                 |
| Sum of electronic and thermal Enthalpies =    |             |             | -878.427424                 |
| Sum of electronic and thermal Free Energies = |             |             | -878.493729                 |
| C                                             | 1.97197500  | -0.92926300 | 0.00002200                  |
| C                                             | 2.99327800  | 0.04194200  | -0.00002700                 |
| C                                             | 4.32572600  | -0.33829600 | -0.00006000                 |
| C                                             | 4.62854200  | -1.69910300 | -0.00004300                 |
| C                                             | 3.61456300  | -2.65328900 | 0.00000600                  |
| C                                             | 2.27029300  | -2.28070300 | 0.00003900                  |
| C                                             | 0.83730600  | 1.08184300  | 0.00002300                  |
| C                                             | 2.29462200  | 1.31157100  | -0.00003500                 |
| H                                             | 5.11646000  | 0.40395400  | -0.00010200                 |
| H                                             | 5.66463000  | -2.01598100 | -0.00006900                 |
| H                                             | 3.87034200  | -3.70647300 | 0.00001900                  |
| H                                             | 1.48152500  | -3.02411500 | 0.00007900                  |
| H                                             | -0.16743100 | -0.76024700 | 0.00007500                  |
| O                                             | -0.06583300 | 1.88854700  | 0.00003400                  |
| F                                             | -2.05321200 | -1.44587100 | 0.00006200                  |
| C                                             | -3.21534500 | -0.73994000 | 0.00003900                  |
| C                                             | -4.40270400 | -1.44724600 | 0.00002900                  |
| C                                             | -3.15343700 | 0.64043000  | 0.00002500                  |
| C                                             | -5.59332900 | -0.72846500 | 0.00000500                  |
| H                                             | -4.38258900 | -2.53007700 | 0.00004000                  |
| C                                             | -4.35690100 | 1.33950000  | 0.00000200                  |
| H                                             | -2.19358300 | 1.14797800  | 0.00003100                  |
| C                                             | -5.57241300 | 0.66269100  | -0.00000700                 |
| H                                             | -6.53740900 | -1.26062000 | -0.00000300                 |
| H                                             | -4.33715600 | 2.42296900  | -0.00000900                 |
| H                                             | -6.50255100 | 1.21845200  | -0.00002500                 |
| N                                             | 0.73053800  | -0.29660000 | 0.00005100                  |
| N                                             | 2.79568900  | 2.51595700  | -0.00007700                 |

|   |            |            |             |
|---|------------|------------|-------------|
| N | 3.20809700 | 3.55758600 | -0.00011200 |
|---|------------|------------|-------------|

**(5) 1a + PhCl**

|                                               |             |             |                             |
|-----------------------------------------------|-------------|-------------|-----------------------------|
| Zero-point correction =                       |             |             | 0.214274 (Hartree/Particle) |
| Thermal correction to Energy =                |             |             | 0.229944                    |
| Thermal correction to Enthalpy =              |             |             | 0.230889                    |
| Thermal correction to Gibbs Free Energy =     |             |             | 0.166804                    |
| Sum of electronic and zero-point Energies =   |             |             | -1238.804847                |
| Sum of electronic and thermal Energies =      |             |             | -1238.789176                |
| Sum of electronic and thermal Enthalpies =    |             |             | -1238.788232                |
| Sum of electronic and thermal Free Energies = |             |             | -1238.852316                |
| C                                             | 2.25360300  | -0.87162600 | 0.00023900                  |
| C                                             | 3.22750400  | 0.14694700  | -0.00016000                 |
| C                                             | 4.57638900  | -0.17210200 | -0.00070100                 |
| C                                             | 4.94135200  | -1.51753300 | -0.00083200                 |
| C                                             | 3.97289900  | -2.51784700 | -0.00043800                 |
| C                                             | 2.61298500  | -2.20753600 | 0.00010100                  |
| C                                             | 1.02383400  | 1.08395900  | 0.00077800                  |
| C                                             | 2.46866800  | 1.38227300  | 0.00011800                  |
| H                                             | 5.33197300  | 0.60591100  | -0.00103800                 |
| H                                             | 5.99111500  | -1.78567800 | -0.00124900                 |
| H                                             | 4.27747900  | -3.55793300 | -0.00054400                 |
| H                                             | 1.86022900  | -2.98754000 | 0.00043600                  |
| H                                             | 0.10958500  | -0.80354000 | 0.00095000                  |
| O                                             | 0.08105600  | 1.84370500  | 0.00115400                  |
| C                                             | -3.41584600 | -0.68835600 | 0.00005700                  |
| C                                             | -4.74621400 | -1.08130800 | -0.00026500                 |
| C                                             | -3.03817200 | 0.64566400  | -0.00001600                 |
| C                                             | -5.73072600 | -0.10009700 | -0.00067600                 |
| H                                             | -5.00223700 | -2.13370900 | -0.00019900                 |
| C                                             | -4.03926300 | 1.61215400  | -0.00042800                 |
| H                                             | -1.99374200 | 0.93949900  | 0.00025800                  |
| C                                             | -5.38033600 | 1.24592200  | -0.00076600                 |
| H                                             | -6.77425100 | -0.39378800 | -0.00093100                 |
| H                                             | -3.75665100 | 2.65860800  | -0.00048400                 |
| H                                             | -6.15188500 | 2.00701300  | -0.00111400                 |
| N                                             | 0.98405300  | -0.29794700 | 0.00080300                  |
| N                                             | 2.91002900  | 2.61003900  | -0.00007200                 |
| N                                             | 3.26807100  | 3.67135800  | -0.00022100                 |
| Cl                                            | -2.17854100 | -1.93798400 | 0.00053200                  |

**(6) IM<sub>2</sub>-PhF**

|                                             |  |  |                             |
|---------------------------------------------|--|--|-----------------------------|
| Zero-point correction =                     |  |  | 1.191813 (Hartree/Particle) |
| Thermal correction to Energy =              |  |  | 1.268218                    |
| Thermal correction to Enthalpy =            |  |  | 1.269162                    |
| Thermal correction to Gibbs Free Energy =   |  |  | 1.067194                    |
| Sum of electronic and zero-point Energies = |  |  | -4636.531596                |
| Sum of electronic and thermal Energies =    |  |  | -4636.455191                |

|                                               |             |             |              |
|-----------------------------------------------|-------------|-------------|--------------|
| Sum of electronic and thermal Enthalpies =    |             |             | -4636.454247 |
| Sum of electronic and thermal Free Energies = |             |             | -4636.656215 |
| Au                                            | 0.29251700  | -1.18743000 | -0.15370300  |
| Au                                            | 1.26779100  | 1.65412200  | -1.49432000  |
| P                                             | 1.96220200  | -2.80407300 | -0.63696400  |
| P                                             | 1.30257000  | 2.86838800  | 0.44501200   |
| Cl                                            | 1.29529500  | 0.09375900  | -3.32790200  |
| O                                             | 3.61744500  | 1.34417700  | 0.68152500   |
| O                                             | 3.80500900  | -0.69675100 | -0.23124600  |
| C                                             | 2.67680100  | -3.52038700 | 0.87637000   |
| C                                             | 3.89185200  | -4.21442900 | 0.84256200   |
| H                                             | 4.42778000  | -4.32741500 | -0.09432200  |
| C                                             | 4.41881600  | -4.75184100 | 2.01208700   |
| H                                             | 5.35693100  | -5.28636000 | 1.98628700   |
| C                                             | 3.73432100  | -4.60384700 | 3.21668800   |
| H                                             | 4.14460700  | -5.02332400 | 4.12896700   |
| C                                             | 2.52221700  | -3.91806600 | 3.25192200   |
| H                                             | 1.99164500  | -3.80394400 | 4.19455900   |
| C                                             | 2.00148500  | -3.37063600 | 2.08591700   |
| H                                             | 1.06739400  | -2.81240100 | 2.12619700   |
| C                                             | 1.07021400  | -4.15788600 | -1.47759300  |
| C                                             | 1.02406300  | -5.45823800 | -0.98153300  |
| H                                             | 1.55807500  | -5.71606100 | -0.07936200  |
| C                                             | 0.26927500  | -6.42032700 | -1.65389900  |
| H                                             | 0.22923400  | -7.43105100 | -1.26517900  |
| C                                             | -0.41645700 | -6.09060700 | -2.81237000  |
| H                                             | -0.99374200 | -6.84880100 | -3.32830200  |
| C                                             | -0.36450800 | -4.79114800 | -3.31327500  |
| H                                             | -0.89505600 | -4.53817300 | -4.22156400  |
| C                                             | 0.36853300  | -3.82094300 | -2.64201400  |
| H                                             | 0.41791300  | -2.80506200 | -3.02915700  |
| C                                             | -0.20976200 | 3.77747700  | 0.90828800   |
| C                                             | -1.31455900 | 3.78057700  | 0.05973900   |
| H                                             | -1.28447400 | 3.23557300  | -0.87829700  |
| C                                             | -2.44832900 | 4.51561000  | 0.40757400   |
| H                                             | -3.29806500 | 4.53367200  | -0.26313300  |
| C                                             | -2.48301000 | 5.22990700  | 1.59491400   |
| H                                             | -3.36214900 | 5.80429000  | 1.86188000   |
| C                                             | -1.37807400 | 5.22420200  | 2.44427900   |
| H                                             | -1.39460800 | 5.78792500  | 3.37190600   |
| C                                             | -0.23754700 | 4.50902700  | 2.10057600   |
| H                                             | 0.62555200  | 4.52238700  | 2.75149300   |
| C                                             | 2.66383100  | 4.08316000  | 0.55086100   |
| C                                             | 3.35216500  | 4.29230200  | 1.74995200   |
| H                                             | 3.08868400  | 3.72477300  | 2.63714100   |
| C                                             | 4.38907700  | 5.21495100  | 1.79400800   |
| H                                             | 4.92435100  | 5.37544600  | 2.72737700   |
| C                                             | 4.74885300  | 5.91923700  | 0.65143900   |

|   |             |             |             |
|---|-------------|-------------|-------------|
| H | 5.56732900  | 6.63685200  | 0.68971100  |
| C | 4.06583300  | 5.70917200  | -0.53769100 |
| H | 4.35142000  | 6.25445000  | -1.43482200 |
| C | 3.02999900  | 4.78229500  | -0.59491600 |
| H | 2.50948300  | 4.60504000  | -1.52849300 |
| C | 3.38621400  | -2.45616500 | -1.70222400 |
| C | 4.20496100  | -1.38085000 | -1.34149000 |
| C | 5.35170400  | -1.06387500 | -2.05782400 |
| C | 5.65345900  | -1.83488300 | -3.18017100 |
| H | 6.53811600  | -1.58960700 | -3.76045100 |
| C | 4.85139500  | -2.90167400 | -3.56748400 |
| H | 5.10608200  | -3.48327100 | -4.43989100 |
| C | 3.71584600  | -3.21168200 | -2.82584000 |
| H | 3.08655500  | -4.04430800 | -3.11858200 |
| C | 1.60371400  | 1.69277900  | 1.80441900  |
| C | 2.80744400  | 0.98530900  | 1.71573300  |
| C | 3.16102000  | 0.00091100  | 2.63001800  |
| C | 2.24013300  | -0.29538900 | 3.63811900  |
| H | 2.48875400  | -1.06502400 | 4.35958100  |
| C | 1.02292900  | 0.37144000  | 3.72946900  |
| H | 0.31689500  | 0.10892200  | 4.50620500  |
| C | 0.70597500  | 1.37776400  | 2.81240100  |
| H | -0.24344000 | 1.89326200  | 2.88591800  |
| C | 4.47459100  | -0.73141700 | 2.47862500  |
| H | 4.26557000  | -1.75984500 | 2.17832800  |
| H | 4.97757200  | -0.78271000 | 3.44823200  |
| C | 6.20594700  | 0.10473200  | -1.61907800 |
| H | 7.04568400  | -0.25364000 | -1.02027200 |
| H | 6.63650300  | 0.59551400  | -2.49822500 |
| C | 4.57567100  | 0.40525500  | 0.25448700  |
| C | 5.40112700  | -0.05826900 | 1.45441600  |
| H | 6.11571500  | -0.80595000 | 1.09156700  |
| C | 6.17050800  | 1.13927700  | 2.02397300  |
| H | 6.79864000  | 0.79649100  | 2.85389900  |
| H | 5.45099600  | 1.85177200  | 2.44461800  |
| C | 7.01565400  | 1.82608200  | 0.95430700  |
| H | 7.51767200  | 2.69710500  | 1.38234200  |
| H | 7.80965500  | 1.14626800  | 0.62584700  |
| C | 6.16025800  | 2.26984600  | -0.23974300 |
| H | 5.46354200  | 3.04405200  | 0.08363700  |
| H | 6.79180700  | 2.71222100  | -1.01577400 |
| C | 5.35916000  | 1.10676000  | -0.84269600 |
| H | 4.60050200  | 1.50939300  | -1.53211500 |
| C | -1.44372500 | -0.18981500 | 0.20750100  |
| C | -2.16240000 | -0.12532300 | 1.56228900  |
| C | -2.26937900 | 0.50594000  | -0.65392900 |
| C | -3.41191400 | 1.01133400  | 0.06611200  |
| O | -1.81892400 | -0.60145100 | 2.60811200  |



|   |             |             |             |
|---|-------------|-------------|-------------|
| N | -3.32906400 | 0.63270200  | 1.36958400  |
| C | -2.12894000 | 0.78426300  | -2.04807100 |
| C | -4.37341300 | 1.79360900  | -0.56677700 |
| C | -3.07554100 | 1.56539600  | -2.65800200 |
| C | -4.17621900 | 2.05881800  | -1.91234600 |
| H | -4.90704800 | 2.68555300  | -2.42206500 |
| H | -5.23878400 | 2.16686000  | -0.03450200 |
| H | -2.99056100 | 1.80764800  | -3.70553400 |
| H | -1.28166100 | 0.38234900  | -2.58748500 |
| H | -3.98370600 | 0.88646000  | 2.09398600  |
| F | -5.55228000 | 1.28303300  | 3.31559100  |
| C | -5.50460100 | 0.06674700  | 3.91676900  |
| C | -4.37102800 | -0.26307000 | 4.63326900  |
| C | -6.56979100 | -0.80670800 | 3.74446100  |
| C | -4.29908400 | -1.54163800 | 5.18986100  |
| H | -3.56789800 | 0.45426600  | 4.74209000  |
| C | -6.47535400 | -2.07464100 | 4.30219600  |
| H | -7.43781200 | -0.48532300 | 3.17900800  |
| C | -5.34336000 | -2.44329100 | 5.02406200  |
| H | -3.41757200 | -1.81983000 | 5.75117100  |
| H | -7.28363800 | -2.78052400 | 4.16302200  |
| H | -5.27310900 | -3.43720300 | 5.44402000  |
| C | -3.81091600 | -2.41577400 | 0.33283400  |
| C | -2.62308700 | -2.80887800 | -0.14349300 |
| H | -1.92758700 | -3.37572600 | 0.47122500  |
| H | -2.29532300 | -2.63029900 | -1.16313100 |
| C | -4.81882500 | -1.68786400 | -0.47050700 |
| C | -5.97865800 | -1.17916300 | 0.13818400  |
| C | -4.66584000 | -1.49276900 | -1.85392200 |
| C | -6.94152000 | -0.52360400 | -0.61050000 |
| H | -6.15119500 | -1.34571300 | 1.19186800  |
| C | -5.63528700 | -0.83276400 | -2.59125600 |
| H | -3.80153100 | -1.88929400 | -2.36970200 |
| C | -6.79789700 | -0.34488800 | -1.98542100 |
| H | -5.50725700 | -0.72088300 | -3.66343700 |
| C | -4.15099500 | -2.72384900 | 1.77340000  |
| H | -3.34581100 | -3.29111000 | 2.24405600  |
| H | -4.32669600 | -1.82000400 | 2.35378500  |
| F | -5.30693300 | -3.48549300 | 1.83963800  |
| H | -7.84157200 | -0.16634800 | -0.11576100 |
| C | -7.87091000 | 0.33421600  | -2.79899900 |
| C | -7.53129700 | 1.78739100  | -3.13979900 |
| H | -8.81810800 | 0.30053300  | -2.25703100 |
| H | -8.02703600 | -0.22464500 | -3.72959100 |
| C | -8.64462200 | 2.49682000  | -3.89887300 |
| H | -7.31907200 | 2.32937600  | -2.20960600 |
| H | -6.61195500 | 1.81152200  | -3.73857500 |
| C | -8.28282700 | 3.94035400  | -4.24076100 |

|   |             |            |             |
|---|-------------|------------|-------------|
| H | -8.86874100 | 1.94270400 | -4.81698900 |
| H | -9.56329200 | 2.47878200 | -3.29560400 |
| H | -9.09634200 | 4.44179300 | -4.77394400 |
| H | -8.08004900 | 4.51773400 | -3.33813100 |
| H | -7.39582800 | 3.98280500 | -4.87425200 |

**(7) IM<sub>2</sub>-PhF-1**

|                                               |             |             |                             |
|-----------------------------------------------|-------------|-------------|-----------------------------|
| Zero-point correction =                       |             |             | 1.189631 (Hartree/Particle) |
| Thermal correction to Energy =                |             |             | 1.266014                    |
| Thermal correction to Enthalpy =              |             |             | 1.266958                    |
| Thermal correction to Gibbs Free Energy =     |             |             | 1.065280                    |
| Sum of electronic and zero-point Energies =   |             |             | -4636.524394                |
| Sum of electronic and thermal Energies =      |             |             | -4636.448011                |
| Sum of electronic and thermal Enthalpies =    |             |             | -4636.447066                |
| Sum of electronic and thermal Free Energies = |             |             | -4636.648745                |
| Au                                            | -0.27338300 | 1.25079600  | 0.33592600                  |
| Au                                            | -1.29714900 | -0.63310300 | -2.15731300                 |
| P                                             | -1.95484600 | 2.88036500  | 0.71945800                  |
| P                                             | -1.32943500 | -2.65534700 | -1.08448500                 |
| Cl                                            | -1.33611000 | 1.62378300  | -3.01369500                 |
| O                                             | -3.59807200 | -1.40808100 | -0.07045800                 |
| O                                             | -3.82409100 | 0.82592600  | 0.13903700                  |
| C                                             | -2.67595000 | 2.75276800  | 2.38831400                  |
| C                                             | -3.91465800 | 3.31726600  | 2.68160400                  |
| H                                             | -4.47483000 | 3.84832900  | 1.91320600                  |
| C                                             | -4.44354200 | 3.21236600  | 3.96765500                  |
| H                                             | -5.41056500 | 3.65957400  | 4.18797100                  |
| C                                             | -3.72617600 | 2.53901000  | 4.94546400                  |
| H                                             | -4.13878300 | 2.46256300  | 5.94860500                  |
| C                                             | -2.49584200 | 1.96326400  | 4.65786900                  |
| H                                             | -1.93206500 | 1.44772500  | 5.43841700                  |
| C                                             | -1.96837700 | 2.06938300  | 3.38007500                  |
| H                                             | -1.00798400 | 1.61409200  | 3.14488900                  |
| C                                             | -1.11963800 | 4.49628300  | 0.63732300                  |
| C                                             | -1.20485800 | 5.44373600  | 1.66778000                  |
| H                                             | -1.78622000 | 5.21628900  | 2.55152100                  |
| C                                             | -0.54263000 | 6.65634000  | 1.54835400                  |
| H                                             | -0.61540400 | 7.38624200  | 2.35257500                  |
| C                                             | 0.20247300  | 6.94145800  | 0.41460700                  |
| H                                             | 0.71687500  | 7.89066300  | 0.31886100                  |
| C                                             | 0.29511300  | 6.00236800  | -0.62322600                 |
| H                                             | 0.85715100  | 6.22233400  | -1.51008900                 |
| C                                             | -0.36093800 | 4.76986900  | -0.50827600                 |
| H                                             | -0.30559700 | 4.05158900  | -1.31129900                 |
| C                                             | 0.15978000  | -3.69483500 | -1.16971000                 |
| C                                             | 1.23362000  | -3.32434100 | -1.97273600                 |
| H                                             | 1.19887600  | -2.38382800 | -2.52415500                 |
| C                                             | 2.34239200  | -4.15627800 | -2.07919600                 |

|   |             |             |             |
|---|-------------|-------------|-------------|
| H | 3.16202000  | -3.87066700 | -2.72658200 |
| C | 2.37737600  | -5.36592500 | -1.38685700 |
| H | 3.23832900  | -6.02053600 | -1.49759400 |
| C | 1.30598500  | -5.73903300 | -0.59189500 |
| H | 1.32113700  | -6.68934800 | -0.06191700 |
| C | 0.18652800  | -4.91560700 | -0.48696600 |
| H | -0.66015500 | -5.23083500 | 0.12206000  |
| C | -2.72036800 | -3.71785600 | -1.58544600 |
| C | -3.39770400 | -4.52081900 | -0.66441300 |
| H | -3.11710900 | -4.50013900 | 0.38391400  |
| C | -4.45335200 | -5.32386300 | -1.09298100 |
| H | -4.98815400 | -5.93704100 | -0.38233200 |
| C | -4.83468300 | -5.32101800 | -2.42757200 |
| H | -5.65945100 | -5.94259100 | -2.76667800 |
| C | -4.16193200 | -4.51231700 | -3.34435000 |
| H | -4.45446300 | -4.51090300 | -4.38919800 |
| C | -3.10381400 | -3.71093600 | -2.92972200 |
| H | -2.59270800 | -3.07776200 | -3.64289200 |
| C | -3.38718900 | 3.05492900  | -0.38628900 |
| C | -4.22004400 | 1.94626500  | -0.54826200 |
| C | -5.38273800 | 1.99445200  | -1.31156500 |
| C | -5.67299100 | 3.18873400  | -1.96634100 |
| H | -6.55597400 | 3.24209400  | -2.57515600 |
| C | -4.84923200 | 4.30801200  | -1.84810000 |
| H | -5.08829600 | 5.22285200  | -2.37151900 |
| C | -3.69881100 | 4.23653800  | -1.05681500 |
| H | -3.06568500 | 5.10740600  | -0.95259900 |
| C | -1.59370300 | -2.31267500 | 0.68959200  |
| C | -2.78523400 | -1.62521300 | 0.99339900  |
| C | -3.10601900 | -1.22534000 | 2.27597500  |
| C | -2.17934900 | -1.50564600 | 3.29152500  |
| H | -2.41472700 | -1.20644400 | 4.30296400  |
| C | -0.99684300 | -2.16247600 | 3.01383000  |
| H | -0.27539500 | -2.35136900 | 3.81296900  |
| C | -0.68575900 | -2.57193700 | 1.72282100  |
| H | 0.23780000  | -3.08335300 | 1.49917400  |
| C | -4.39887800 | -0.48896800 | 2.53705600  |
| H | -4.17474000 | 0.55817000  | 2.74591000  |
| H | -4.88337200 | -0.89361300 | 3.42880200  |
| C | -6.23801200 | 0.77170000  | -1.41768300 |
| H | -7.04907000 | 0.80805400  | -0.68278200 |
| H | -6.72507800 | 0.73773000  | -2.40333700 |
| C | -4.57053100 | -0.39061500 | 0.04454600  |
| C | -5.36507300 | -0.58103600 | 1.34498500  |
| H | -6.08391100 | 0.22391600  | 1.41239800  |
| C | -6.10308700 | -1.91945500 | 1.26368000  |
| H | -6.70736500 | -2.04664400 | 2.18249700  |
| H | -5.37420900 | -2.73983800 | 1.25659500  |

|   |             |             |             |
|---|-------------|-------------|-------------|
| C | -6.99265200 | -2.00523400 | 0.02690200  |
| H | -7.48850300 | -2.98150600 | -0.00732800 |
| H | -7.79176000 | -1.26879600 | 0.09511200  |
| C | -6.18459800 | -1.79900200 | -1.25690100 |
| H | -5.48365700 | -2.62779300 | -1.37274800 |
| H | -6.83140500 | -1.81164800 | -2.13087400 |
| C | -5.38785500 | -0.48480600 | -1.23546000 |
| H | -4.64800600 | -0.49812900 | -2.05336700 |
| C | 1.42123300  | 0.12848300  | 0.13821200  |
| C | 2.11489900  | -0.64534100 | 1.27356600  |
| C | 2.21812800  | -0.11171200 | -0.96822800 |
| C | 3.29863900  | -0.99076900 | -0.61364600 |
| O | 1.78871100  | -0.69864600 | 2.42718000  |
| N | 3.20400600  | -1.30495700 | 0.71419500  |
| C | 2.08971100  | 0.35891000  | -2.31295500 |
| C | 4.23590600  | -1.38740500 | -1.55289900 |
| C | 3.01505600  | -0.05644400 | -3.22982000 |
| C | 4.08148600  | -0.90795800 | -2.84276500 |
| H | 4.80742000  | -1.20434000 | -3.58504600 |
| H | 5.07398200  | -2.04011400 | -1.29164900 |
| H | 2.94914600  | 0.27249700  | -4.26546500 |
| H | 1.26044800  | 1.02064200  | -2.56198900 |
| H | 3.85045100  | -1.87885300 | 1.24569100  |
| F | 4.95921300  | -2.40292700 | 2.72397700  |
| C | 4.76330700  | -2.84885200 | 4.00431800  |
| C | 3.68188800  | -2.35699800 | 4.72646300  |
| C | 5.66171800  | -3.77944700 | 4.50099600  |
| C | 3.51251800  | -2.79587800 | 6.05827300  |
| H | 3.00047200  | -1.65276500 | 4.26253400  |
| C | 5.47793900  | -4.20366500 | 5.83169200  |
| H | 6.47983300  | -4.14470000 | 3.89143600  |
| C | 4.42203700  | -3.68191000 | 6.59998200  |
| H | 2.69028000  | -2.41608400 | 6.67664300  |
| H | 6.15322500  | -4.92614600 | 6.29123400  |
| C | 4.01248900  | 1.71035000  | 1.34519300  |
| C | 2.83583600  | 2.35020700  | 1.18002000  |
| H | 2.18695900  | 2.54469500  | 2.02678900  |
| H | 2.52385800  | 2.77090200  | 0.23642500  |
| C | 4.97240600  | 1.44960100  | 0.26381700  |
| C | 6.08755500  | 0.61002300  | 0.46679000  |
| C | 4.81045300  | 2.00390700  | -1.00904500 |
| C | 6.97503100  | 0.34596500  | -0.55235800 |
| H | 6.28479700  | 0.21330300  | 1.46028500  |
| C | 5.70318700  | 1.72198000  | -2.03349100 |
| H | 3.97901500  | 2.66935700  | -1.21634500 |
| C | 6.79257600  | 0.87189900  | -1.83549200 |
| H | 5.54615500  | 2.16844300  | -3.00563200 |
| C | 4.36879800  | 1.21509800  | 2.72816100  |

|   |             |             |             |
|---|-------------|-------------|-------------|
| H | 3.57737100  | 1.45324000  | 3.44558800  |
| H | 4.54940800  | 0.12973200  | 2.74284000  |
| F | 5.54205400  | 1.81399100  | 3.15235700  |
| H | 7.84066000  | -0.29415600 | -0.35023300 |
| C | 7.79506200  | 0.63193100  | -2.92142900 |
| H | 7.29359600  | 0.65644400  | -3.90235400 |
| H | 8.23978400  | -0.37158900 | -2.81350000 |
| C | 8.92524800  | 1.67783800  | -2.90151100 |
| C | 9.95971000  | 1.44915600  | -4.00236200 |
| H | 9.41840300  | 1.66080600  | -1.92898400 |
| H | 8.47869900  | 2.66915500  | -3.00542800 |
| C | 11.06542700 | 2.49895300  | -3.97360300 |
| H | 10.38984000 | 0.45363100  | -3.90136600 |
| H | 9.44788900  | 1.47740000  | -4.98385100 |
| H | 11.78894400 | 2.34237200  | -4.78422700 |
| H | 10.65134400 | 3.50953200  | -4.10568200 |
| H | 11.59545300 | 2.48055500  | -3.02696100 |
| H | 4.30259400  | -3.97119100 | 7.63579100  |

#### (8) TS<sub>2-3</sub>-PhF

|                                               |            |             |                             |
|-----------------------------------------------|------------|-------------|-----------------------------|
| Zero-point correction =                       |            |             | 1.191356 (Hartree/Particle) |
| Thermal correction to Energy =                |            |             | 1.265900                    |
| Thermal correction to Enthalpy =              |            |             | 1.266844                    |
| Thermal correction to Gibbs Free Energy =     |            |             | 1.069084                    |
| Sum of electronic and zero-point Energies =   |            |             | -4636.520540                |
| Sum of electronic and thermal Energies =      |            |             | -4636.445996                |
| Sum of electronic and thermal Enthalpies =    |            |             | -4636.445052                |
| Sum of electronic and thermal Free Energies = |            |             | -4636.642811                |
| Au                                            | 0.31109600 | -1.27707500 | -0.35779100                 |
| Au                                            | 1.23680600 | 1.73158700  | -1.31657100                 |
| P                                             | 2.18169100 | -2.63760300 | -0.89601200                 |
| P                                             | 1.07985100 | 2.75507100  | 0.72925000                  |
| Cl                                            | 1.44707600 | 0.40232300  | -3.31089900                 |
| O                                             | 3.46336200 | 1.36718900  | 1.01184600                  |
| O                                             | 3.92014100 | -0.56284000 | -0.05376000                 |
| C                                             | 2.88617800 | -3.47804300 | 0.55953400                  |
| C                                             | 4.16404600 | -4.04737900 | 0.51313400                  |
| H                                             | 4.74929900 | -3.98224000 | -0.39438300                 |
| C                                             | 4.67991800 | -4.68749600 | 1.63645100                  |
| H                                             | 5.66812200 | -5.12560500 | 1.59323400                  |
| C                                             | 3.92850900 | -4.76714500 | 2.80075000                  |
| H                                             | 4.33575900 | -5.26675100 | 3.67224200                  |
| C                                             | 2.65284100 | -4.20396700 | 2.84872500                  |
| H                                             | 2.06845600 | -4.26566600 | 3.76053600                  |
| C                                             | 2.13483200 | -3.55559500 | 1.73432600                  |
| H                                             | 1.15439200 | -3.09993600 | 1.78271100                  |
| C                                             | 1.47833400 | -3.94684800 | -1.95679500                 |
| C                                             | 1.60718700 | -5.30313800 | -1.67507300                 |

|   |             |             |             |
|---|-------------|-------------|-------------|
| H | 2.15667100  | -5.63220500 | -0.80147800 |
| C | 1.02347800  | -6.24199300 | -2.52267500 |
| H | 1.11975500  | -7.30403600 | -2.30026800 |
| C | 0.31883600  | -5.82961900 | -3.64893700 |
| H | -0.13211900 | -6.56730500 | -4.30358300 |
| C | 0.19512000  | -4.47315400 | -3.93192900 |
| H | -0.34423400 | -4.14924100 | -4.81547600 |
| C | 0.76219000  | -3.53066900 | -3.08863000 |
| H | 0.67762700  | -2.47048000 | -3.31194900 |
| C | -0.49358600 | 3.56890900  | 1.14718700  |
| C | -1.48835700 | 3.70910800  | 0.18078300  |
| H | -1.34895200 | 3.27589300  | -0.80740700 |
| C | -2.64648600 | 4.42483700  | 0.47776700  |
| H | -3.40013400 | 4.55700200  | -0.28597700 |
| C | -2.81900100 | 4.98178700  | 1.73724500  |
| H | -3.71411000 | 5.54685800  | 1.96161600  |
| C | -1.83042000 | 4.83261400  | 2.70818700  |
| H | -1.96279400 | 5.27377600  | 3.69113300  |
| C | -0.66723900 | 4.13802600  | 2.41439700  |
| H | 0.10668900  | 4.04450800  | 3.16563500  |
| C | 2.35270900  | 4.02504200  | 1.03368000  |
| C | 2.91951100  | 4.19309500  | 2.30059300  |
| H | 2.62425600  | 3.54766600  | 3.12242700  |
| C | 3.87941800  | 5.17544000  | 2.50498200  |
| H | 4.31626300  | 5.30742800  | 3.48396000  |
| C | 4.27852800  | 5.99075700  | 1.45066700  |
| H | 5.03264400  | 6.75731500  | 1.61241800  |
| C | 3.72381000  | 5.82006900  | 0.18691300  |
| H | 4.04007200  | 6.44997300  | -0.63895400 |
| C | 2.76297200  | 4.83585700  | -0.02531800 |
| H | 2.33547500  | 4.69336300  | -1.01543900 |
| C | 3.62663700  | -2.04499300 | -1.82629900 |
| C | 4.38087800  | -1.01827000 | -1.24849500 |
| C | 5.54154400  | -0.54026000 | -1.84451700 |
| C | 5.92152500  | -1.09631900 | -3.06960400 |
| H | 6.81674400  | -0.71901200 | -3.56062500 |
| C | 5.17927300  | -2.10397500 | -3.66922300 |
| H | 5.48926800  | -2.51624300 | -4.62090500 |
| C | 4.03612000  | -2.58336300 | -3.04105600 |
| H | 3.45600600  | -3.37526900 | -3.50780400 |
| C | 1.35464100  | 1.48427900  | 1.99586600  |
| C | 2.60951900  | 0.85882400  | 1.94341800  |
| C | 2.95404500  | -0.18962300 | 2.78590700  |
| C | 1.97951800  | -0.63519700 | 3.68034700  |
| H | 2.22164200  | -1.46155600 | 4.34411800  |
| C | 0.71567800  | -0.05903800 | 3.72938000  |
| H | -0.03103200 | -0.43582300 | 4.41651700  |
| C | 0.40327400  | 1.01129100  | 2.89111400  |

|   |             |             |             |
|---|-------------|-------------|-------------|
| H | -0.58449900 | 1.46007300  | 2.93253700  |
| C | 4.32689700  | -0.81261100 | 2.67944400  |
| H | 4.22350300  | -1.81400300 | 2.24246100  |
| H | 4.75073500  | -0.94771900 | 3.67962300  |
| C | 6.30729300  | 0.55911000  | -1.16465400 |
| H | 7.09840700  | 0.14180800  | -0.52534200 |
| H | 6.81168100  | 1.18387300  | -1.90456300 |
| C | 4.53148500  | 0.54271800  | 0.59875200  |
| C | 5.28208700  | 0.02961400  | 1.82748800  |
| H | 6.08801600  | -0.62277100 | 1.46435500  |
| C | 5.89925200  | 1.21754800  | 2.57624700  |
| H | 6.47624200  | 0.84317500  | 3.42536500  |
| H | 5.09468000  | 1.83845900  | 2.98623600  |
| C | 6.78409400  | 2.05555400  | 1.65652300  |
| H | 7.18713600  | 2.91018900  | 2.20195900  |
| H | 7.64785100  | 1.46027500  | 1.33495600  |
| C | 6.00329900  | 2.55530100  | 0.43655300  |
| H | 5.21957000  | 3.24618800  | 0.77454600  |
| H | 6.65594200  | 3.12479100  | -0.23542400 |
| C | 5.33943700  | 1.41818300  | -0.35002700 |
| H | 4.61504800  | 1.84543900  | -1.05301900 |
| C | -1.56677400 | -0.48329900 | -0.03837200 |
| C | -2.30252000 | -0.40974800 | 1.30150300  |
| C | -2.28483800 | 0.39678900  | -0.88369200 |
| C | -3.39171900 | 0.93839500  | -0.17191700 |
| O | -2.03365300 | -0.96999700 | 2.33325300  |
| N | -3.38109600 | 0.45253500  | 1.11503200  |
| C | -2.04576100 | 0.78140700  | -2.21605600 |
| C | -4.26591800 | 1.83440000  | -0.77264000 |
| C | -2.89961300 | 1.68574800  | -2.80882900 |
| C | -4.00292700 | 2.19085600  | -2.08769800 |
| H | -4.67276400 | 2.89233400  | -2.57980100 |
| H | -5.11921900 | 2.24034600  | -0.23702900 |
| H | -2.73448000 | 2.01000000  | -3.82692800 |
| H | -1.18597000 | 0.38363900  | -2.75029800 |
| H | -4.07730600 | 0.61874400  | 1.82734900  |
| F | -5.53366300 | -0.26924700 | 2.99309200  |
| C | -5.64645700 | -1.12063700 | 4.05556000  |
| C | -4.49124800 | -1.57865100 | 4.65421500  |
| C | -6.91112200 | -1.49499700 | 4.45502600  |
| C | -4.61473300 | -2.46120700 | 5.72102500  |
| H | -3.52377200 | -1.25688400 | 4.27513600  |
| C | -7.01898800 | -2.37969200 | 5.52780300  |
| H | -7.78379900 | -1.10397200 | 3.94609500  |
| C | -5.87884700 | -2.85950700 | 6.15981600  |
| H | -3.72943200 | -2.83608200 | 6.21102000  |
| H | -8.00005500 | -2.68514800 | 5.86677500  |
| H | -5.96777200 | -3.54431500 | 6.99281200  |

|   |             |             |             |
|---|-------------|-------------|-------------|
| C | -3.82584700 | -2.36117900 | -0.13431000 |
| C | -2.54877600 | -2.56347400 | -0.56914200 |
| H | -1.87254200 | -3.18685400 | 0.00767700  |
| H | -2.24004000 | -2.36529600 | -1.58414800 |
| C | -4.81417700 | -1.62183300 | -0.89782500 |
| C | -5.97710400 | -1.11815800 | -0.27786000 |
| C | -4.62192700 | -1.33556600 | -2.26136200 |
| C | -6.87376400 | -0.33942200 | -0.98502800 |
| H | -6.17388100 | -1.33523000 | 0.76298800  |
| C | -5.53000300 | -0.55799900 | -2.96454500 |
| H | -3.76862800 | -1.73749900 | -2.79361100 |
| C | -6.66234900 | -0.03792300 | -2.33902200 |
| H | -5.35387800 | -0.35217000 | -4.01195400 |
| C | -4.19523300 | -2.84961300 | 1.25305500  |
| H | -3.44944500 | -3.54439300 | 1.62981400  |
| H | -4.28020800 | -2.01593100 | 1.94871100  |
| F | -5.41832700 | -3.49365500 | 1.21967300  |
| H | -7.76214700 | 0.04634200  | -0.48926200 |
| C | -7.68454400 | 0.82465000  | -3.10553900 |
| C | -7.15217000 | 2.22546600  | -3.29134400 |
| H | -8.63765900 | 0.83751000  | -2.53031400 |
| H | -7.87771700 | 0.34698800  | -4.09846700 |
| C | -8.13858400 | 3.09895700  | -4.03429800 |
| H | -6.93386200 | 2.67933200  | -2.28547100 |
| H | -6.19527400 | 2.18826300  | -3.87664500 |
| C | -7.61120900 | 4.49988900  | -4.20803300 |
| H | -8.35687000 | 2.65014500  | -5.03518600 |
| H | -9.10774300 | 3.13433600  | -3.47149000 |
| H | -8.35365900 | 5.13057100  | -4.76083800 |
| H | -7.41096400 | 4.97734300  | -3.22204800 |
| H | -6.65792300 | 4.49381700  | -4.79207400 |

### (9) IM<sub>3</sub>-PhF

|                                               |             |             |                             |
|-----------------------------------------------|-------------|-------------|-----------------------------|
| Zero-point correction =                       |             |             | 1.193636 (Hartree/Particle) |
| Thermal correction to Energy =                |             |             | 1.268862                    |
| Thermal correction to Enthalpy =              |             |             | 1.269806                    |
| Thermal correction to Gibbs Free Energy =     |             |             | 1.072410                    |
| Sum of electronic and zero-point Energies =   |             |             | -4636.553374                |
| Sum of electronic and thermal Energies =      |             |             | -4636.478148                |
| Sum of electronic and thermal Enthalpies =    |             |             | -4636.477203                |
| Sum of electronic and thermal Free Energies = |             |             | -4636.674599                |
| Au                                            | -0.57938000 | -0.79639800 | -1.46948400                 |
| Au                                            | 2.46126100  | 0.43940400  | -1.83579400                 |
| P                                             | -1.65884400 | -2.02932600 | 0.12290800                  |
| P                                             | 4.21230200  | 0.46331400  | -0.37911500                 |
| Cl                                            | 0.52673800  | 0.37229100  | -3.36235900                 |
| O                                             | 3.00869600  | -1.99059000 | 0.51196600                  |
| O                                             | 1.00915600  | -3.00572700 | 0.41693700                  |



|   |             |             |             |
|---|-------------|-------------|-------------|
| C | -1.34364400 | -1.54330200 | 1.84267500  |
| C | -1.80199700 | -2.36348200 | 2.87777300  |
| H | -2.30845400 | -3.29704600 | 2.65049000  |
| C | -1.60282100 | -1.98502800 | 4.19820600  |
| H | -1.96590800 | -2.61584800 | 5.00120200  |
| C | -0.94115200 | -0.79374700 | 4.48660000  |
| H | -0.79723300 | -0.49328300 | 5.51846400  |
| C | -0.46297700 | 0.00632500  | 3.45647100  |
| H | 0.07166900  | 0.92222200  | 3.68141200  |
| C | -0.65417500 | -0.36601900 | 2.12960400  |
| H | -0.26323100 | 0.25461000  | 1.32652700  |
| C | -3.46001500 | -2.01069700 | -0.14162300 |
| C | -4.38097400 | -1.85210700 | 0.89399200  |
| H | -4.05023400 | -1.63934400 | 1.90387300  |
| C | -5.74524900 | -1.92186700 | 0.61923700  |
| H | -6.45995700 | -1.78460800 | 1.42210200  |
| C | -6.19070500 | -2.13507100 | -0.67782500 |
| H | -7.25426700 | -2.18353900 | -0.88158300 |
| C | -5.27305900 | -2.26442600 | -1.71859600 |
| H | -5.61693300 | -2.41319200 | -2.73559400 |
| C | -3.91283000 | -2.19760800 | -1.45412200 |
| H | -3.19762400 | -2.29867600 | -2.26603900 |
| C | 5.06448200  | 2.06883100  | -0.30512000 |
| C | 4.37196800  | 3.22191600  | -0.67690800 |
| H | 3.35111700  | 3.15283200  | -1.03999200 |
| C | 4.99283500  | 4.46368300  | -0.59525800 |
| H | 4.45061500  | 5.35216300  | -0.89453100 |
| C | 6.30445500  | 4.55752200  | -0.14646200 |
| H | 6.78982800  | 5.52509500  | -0.09054400 |
| C | 6.99959300  | 3.40957800  | 0.22161800  |
| H | 8.02554200  | 3.47995100  | 0.56339900  |
| C | 6.38501100  | 2.16705600  | 0.14361900  |
| H | 6.94272800  | 1.27866400  | 0.41637500  |
| C | 5.51163000  | -0.78149100 | -0.65521100 |
| C | 6.28636900  | -1.23244900 | 0.41711600  |
| H | 6.08199300  | -0.88133900 | 1.42444200  |
| C | 7.31795700  | -2.13738000 | 0.19505000  |
| H | 7.92141100  | -2.48014700 | 1.02794100  |
| C | 7.57126000  | -2.60275900 | -1.09250000 |
| H | 8.37345000  | -3.31123400 | -1.26379600 |
| C | 6.79126900  | -2.16557100 | -2.15777400 |
| H | 6.98211300  | -2.53325600 | -3.15915700 |
| C | 5.76141300  | -1.25468400 | -1.94212900 |
| H | 5.15051500  | -0.91729100 | -2.77375100 |
| C | -1.16504700 | -3.77145300 | -0.02456500 |
| C | 0.21097800  | -4.04299500 | 0.03421600  |
| C | 0.70996400  | -5.28883600 | -0.33185700 |
| C | -0.20275800 | -6.29436200 | -0.65116900 |

|   |             |             |             |
|---|-------------|-------------|-------------|
| H | 0.17917100  | -7.27141200 | -0.93141300 |
| C | -1.57055100 | -6.06745300 | -0.63326200 |
| H | -2.26047500 | -6.86632500 | -0.87506200 |
| C | -2.05243600 | -4.79387200 | -0.34573600 |
| H | -3.11671400 | -4.59159000 | -0.38698800 |
| C | 3.61580900  | 0.13657400  | 1.30471800  |
| C | 3.03440200  | -1.11409200 | 1.56411100  |
| C | 2.58916200  | -1.44414000 | 2.84183100  |
| C | 2.73812500  | -0.50006500 | 3.85568900  |
| H | 2.41080300  | -0.76442200 | 4.85675600  |
| C | 3.29032200  | 0.74939400  | 3.61225600  |
| H | 3.40333900  | 1.46719600  | 4.41639900  |
| C | 3.72802100  | 1.07127200  | 2.33125400  |
| H | 4.16782300  | 2.04351300  | 2.13497500  |
| C | 2.01364300  | -2.81238500 | 3.08298900  |
| H | 0.92465800  | -2.77628800 | 2.97760300  |
| H | 2.23137100  | -3.13451800 | 4.10464500  |
| C | 2.19773200  | -5.50081300 | -0.42047700 |
| H | 2.52512200  | -6.15204300 | 0.39498000  |
| H | 2.43082100  | -6.03351100 | -1.34623300 |
| C | 2.39581400  | -3.25611500 | 0.66286800  |
| C | 2.60908500  | -3.79926800 | 2.07961500  |
| H | 2.07224600  | -4.75033100 | 2.15247100  |
| C | 4.11156700  | -4.03324300 | 2.31489300  |
| H | 4.24649400  | -4.47478300 | 3.30627300  |
| H | 4.62476800  | -3.06513400 | 2.33464100  |
| C | 4.76004300  | -4.91541300 | 1.24608200  |
| H | 5.84126900  | -4.94212900 | 1.40461500  |
| H | 4.41500600  | -5.94771400 | 1.35842700  |
| C | 4.47048400  | -4.39718400 | -0.16556500 |
| H | 4.98616900  | -3.44813700 | -0.31734900 |
| H | 4.85894400  | -5.09303000 | -0.91503600 |
| C | 2.97466800  | -4.17874900 | -0.40699300 |
| H | 2.82228200  | -3.66738700 | -1.36459300 |
| C | -2.30643700 | 2.67756900  | -0.46749100 |
| C | -0.84522500 | 2.75910200  | -0.59020700 |
| C | -2.82370100 | 3.94055400  | -0.79342400 |
| C | -1.71943400 | 4.77935500  | -1.13650000 |
| O | -0.00529200 | 1.89396200  | -0.34149900 |
| N | -0.55871000 | 4.04324200  | -1.01716200 |
| C | -4.13120800 | 4.47263000  | -0.82953800 |
| C | -1.89340300 | 6.10030500  | -1.50987200 |
| C | -4.30075800 | 5.78974600  | -1.20146000 |
| C | -3.19515600 | 6.59216600  | -1.53811200 |
| H | -3.36117800 | 7.62359300  | -1.82688600 |
| H | -1.04922700 | 6.72779000  | -1.77035100 |
| H | -5.29507800 | 6.21758200  | -1.23557400 |
| H | -4.98207000 | 3.85610300  | -0.56215300 |

|   |              |             |             |
|---|--------------|-------------|-------------|
| H | 0.37784700   | 4.38556000  | -1.16999600 |
| F | 2.05623900   | 5.22994200  | -0.46528200 |
| C | 2.09454900   | 5.17626500  | 0.89594200  |
| C | 1.79196100   | 3.97966400  | 1.51699000  |
| C | 2.44399100   | 6.32342000  | 1.58152700  |
| C | 1.83023500   | 3.94946300  | 2.90839800  |
| H | 1.52347500   | 3.10502000  | 0.93165400  |
| C | 2.48435600   | 6.26802200  | 2.97064800  |
| H | 2.67167500   | 7.23033500  | 1.03460900  |
| C | 2.17571200   | 5.08474500  | 3.63458200  |
| H | 1.59086300   | 3.02546100  | 3.42139200  |
| H | 2.75371800   | 7.15433300  | 3.53266300  |
| H | 2.20110200   | 5.05064400  | 4.71715300  |
| C | -4.03281300  | 1.54567400  | 1.00210900  |
| C | -3.01078400  | 1.41536000  | -0.09194300 |
| H | -2.23642800  | 0.72437700  | 0.25499300  |
| H | -3.44308200  | 0.95075300  | -0.98482300 |
| C | -5.43438700  | 1.36581700  | 0.79134500  |
| C | -6.31071000  | 1.18862800  | 1.88822100  |
| C | -6.01075100  | 1.33102100  | -0.50086600 |
| C | -7.66546600  | 0.98529000  | 1.69752100  |
| H | -5.91127800  | 1.16520200  | 2.89527300  |
| C | -7.36755400  | 1.13399100  | -0.67462500 |
| H | -5.38884900  | 1.47443800  | -1.37783400 |
| C | -8.22502900  | 0.95320300  | 0.41663300  |
| H | -7.77886500  | 1.12198000  | -1.68022200 |
| C | -3.49152700  | 1.70793800  | 2.38255100  |
| H | -2.43924600  | 2.00201700  | 2.35888900  |
| H | -4.05723200  | 2.43464800  | 2.96965800  |
| F | -3.55336000  | 0.49259300  | 3.08758400  |
| H | -8.30918700  | 0.84569000  | 2.56099800  |
| C | -9.69101600  | 0.68612200  | 0.20643100  |
| C | -9.95812300  | -0.75873400 | -0.23383600 |
| H | -10.08722700 | 1.36977200  | -0.55184600 |
| H | -10.24001500 | 0.89086700  | 1.13048500  |
| C | -11.44362700 | -1.05911700 | -0.41396800 |
| H | -9.43065800  | -0.94918900 | -1.17677400 |
| H | -9.52898700  | -1.44570500 | 0.50644000  |
| C | -11.69526800 | -2.49088000 | -0.87650700 |
| H | -11.96551300 | -0.87799000 | 0.53167500  |
| H | -11.86842200 | -0.35570400 | -1.13818400 |
| H | -12.76105000 | -2.69230700 | -0.99559100 |
| H | -11.21271700 | -2.68303100 | -1.83847300 |
| H | -11.29958300 | -3.21192600 | -0.15646400 |

**(10) IM<sub>4</sub>-PhF**

Zero-point correction =

1.195877 (Hartree/Particle)

Thermal correction to Energy =

1.270500

|                                               |             |             |              |
|-----------------------------------------------|-------------|-------------|--------------|
| Thermal correction to Enthalpy =              |             |             | 1.271444     |
| Thermal correction to Gibbs Free Energy =     |             |             | 1.076531     |
| Sum of electronic and zero-point Energies =   |             |             | -4636.606653 |
| Sum of electronic and thermal Energies =      |             |             | -4636.532030 |
| Sum of electronic and thermal Enthalpies =    |             |             | -4636.531086 |
| Sum of electronic and thermal Free Energies = |             |             | -4636.725999 |
| Au                                            | -0.08194900 | -1.13768700 | -1.42168500  |
| Au                                            | 2.09524100  | 1.28102200  | -1.49623600  |
| P                                             | -0.45334200 | -2.93985300 | -0.07765100  |
| P                                             | 3.71646100  | 1.83674000  | 0.00443300   |
| Cl                                            | 0.28118500  | 0.71059600  | -3.05353800  |
| O                                             | 3.75174000  | -0.95937700 | 0.58137100   |
| O                                             | 2.37561700  | -2.69848900 | 0.23697500   |
| C                                             | -0.40314900 | -2.62724200 | 1.70674700   |
| C                                             | -0.48655600 | -3.71080500 | 2.58685000   |
| H                                             | -0.56521200 | -4.72223800 | 2.19882600   |
| C                                             | -0.46550700 | -3.48842200 | 3.95689700   |
| H                                             | -0.53357800 | -4.32553400 | 4.64180300   |
| C                                             | -0.35842600 | -2.18759900 | 4.44755700   |
| H                                             | -0.34650300 | -2.01573400 | 5.51814300   |
| C                                             | -0.27089500 | -1.11328100 | 3.57020700   |
| H                                             | -0.16997400 | -0.10308700 | 3.95030700   |
| C                                             | -0.28855000 | -1.32688400 | 2.19445700   |
| H                                             | -0.22219400 | -0.48933200 | 1.50684000   |
| C                                             | -2.11129300 | -3.58567900 | -0.45948800  |
| C                                             | -3.13668200 | -3.56455300 | 0.48245500   |
| H                                             | -2.94848600 | -3.26368800 | 1.50623000   |
| C                                             | -4.43723900 | -3.88764500 | 0.09841800   |
| H                                             | -5.23261000 | -3.83490900 | 0.83182600   |
| C                                             | -4.70823200 | -4.24864500 | -1.21351600  |
| H                                             | -5.72002200 | -4.50415500 | -1.50795300  |
| C                                             | -3.68271800 | -4.27172500 | -2.15952700  |
| H                                             | -3.89469900 | -4.54096700 | -3.18781100  |
| C                                             | -2.39221900 | -3.92694600 | -1.79021500  |
| H                                             | -1.60370200 | -3.90438300 | -2.53754400  |
| C                                             | 3.89182600  | 3.64152700  | 0.18687400   |
| C                                             | 3.37640000  | 4.46805400  | -0.81273000  |
| H                                             | 2.79415200  | 4.04454200  | -1.62411700  |
| C                                             | 3.60744600  | 5.83954500  | -0.77395900  |
| H                                             | 3.21156900  | 6.47361200  | -1.55857000  |
| C                                             | 4.34045400  | 6.39230900  | 0.26928900   |
| H                                             | 4.51813400  | 7.46111000  | 0.30055500   |
| C                                             | 4.85887800  | 5.57152900  | 1.26833400   |
| H                                             | 5.44074000  | 5.99947900  | 2.07630600   |
| C                                             | 4.65037500  | 4.20013000  | 1.22076500   |
| H                                             | 5.08166400  | 3.56928600  | 1.99045600   |
| C                                             | 5.40441700  | 1.28275600  | -0.40132200  |
| C                                             | 6.36956700  | 1.19331200  | 0.60453600   |

|   |             |             |             |
|---|-------------|-------------|-------------|
| H | 6.10073300  | 1.36971800  | 1.64190000  |
| C | 7.67892300  | 0.86033700  | 0.27907000  |
| H | 8.42747900  | 0.79177600  | 1.06021000  |
| C | 8.02688500  | 0.61167400  | -1.04618900 |
| H | 9.04928600  | 0.35405200  | -1.29789900 |
| C | 7.06326800  | 0.68799700  | -2.04569100 |
| H | 7.33029400  | 0.48778000  | -3.07683700 |
| C | 5.75110500  | 1.02435900  | -1.72570000 |
| H | 4.99879400  | 1.08609600  | -2.50624000 |
| C | 0.74362300  | -4.26210400 | -0.40805500 |
| C | 2.10208500  | -3.92034600 | -0.30332300 |
| C | 3.09188000  | -4.77992900 | -0.76953200 |
| C | 2.70507400  | -6.03494200 | -1.24035000 |
| H | 3.47335700  | -6.71428900 | -1.59719900 |
| C | 1.37385400  | -6.42193600 | -1.27179600 |
| H | 1.09817300  | -7.40644200 | -1.62856900 |
| C | 0.38777500  | -5.52250000 | -0.87821700 |
| H | -0.65876100 | -5.79712300 | -0.94648600 |
| C | 3.34279800  | 1.10925500  | 1.62496000  |
| C | 3.37597700  | -0.29292900 | 1.71747800  |
| C | 3.09153700  | -0.93853300 | 2.91791200  |
| C | 2.77887800  | -0.15703900 | 4.02810200  |
| H | 2.57849300  | -0.65834000 | 4.97040100  |
| C | 2.70580200  | 1.22544300  | 3.94724800  |
| H | 2.44100600  | 1.81622700  | 4.81600000  |
| C | 2.97890000  | 1.85989100  | 2.74073600  |
| H | 2.90352600  | 2.93913100  | 2.67353600  |
| C | 3.15298100  | -2.44018500 | 2.97470200  |
| H | 2.15326600  | -2.85325300 | 2.80353600  |
| H | 3.47172000  | -2.76439600 | 3.96873200  |
| C | 4.52762000  | -4.32666500 | -0.79307200 |
| H | 5.09986700  | -4.88797100 | -0.04893300 |
| H | 4.96692300  | -4.57580700 | -1.76271800 |
| C | 3.73320900  | -2.37290500 | 0.55384500  |
| C | 4.12669000  | -2.95397500 | 1.91549900  |
| H | 4.04028300  | -4.04347700 | 1.84623700  |
| C | 5.58153900  | -2.57079100 | 2.23464000  |
| H | 5.86579300  | -3.03521700 | 3.18297700  |
| H | 5.63862600  | -1.48735900 | 2.39006700  |
| C | 6.56340400  | -2.96568000 | 1.13100400  |
| H | 7.55453600  | -2.56917700 | 1.36581100  |
| H | 6.67478500  | -4.05380500 | 1.10462200  |
| C | 6.11618400  | -2.42942200 | -0.23158400 |
| H | 6.19163300  | -1.34142600 | -0.23372700 |
| H | 6.77791400  | -2.79363800 | -1.02307300 |
| C | 4.67206300  | -2.81754700 | -0.56443700 |
| H | 4.34270200  | -2.28520800 | -1.46452600 |
| C | -3.69377600 | 0.93693400  | -0.97455400 |

|   |              |             |             |
|---|--------------|-------------|-------------|
| C | -2.32062800  | 1.41500800  | -0.59245800 |
| C | -4.26612900  | 2.03430100  | -1.79562100 |
| C | -3.30694100  | 3.05147400  | -1.85805100 |
| O | -1.46978700  | 0.82237700  | 0.06239400  |
| N | -2.17766100  | 2.65790900  | -1.12083800 |
| C | -5.47060800  | 2.18571200  | -2.46246000 |
| C | -3.51574600  | 4.22381900  | -2.56034700 |
| C | -5.69852300  | 3.36318600  | -3.17622500 |
| C | -4.73563200  | 4.36606500  | -3.22174200 |
| H | -4.93218300  | 5.27313700  | -3.78120000 |
| H | -2.76080600  | 5.00032500  | -2.60154400 |
| H | -6.63828700  | 3.49711800  | -3.69800000 |
| H | -6.22858500  | 1.41102900  | -2.42452900 |
| H | -1.30867000  | 3.16856000  | -1.04498200 |
| F | 0.48769200   | 3.68930200  | -0.04800400 |
| C | 0.51155000   | 3.86722300  | 1.30068700  |
| C | -0.14567200  | 2.94919200  | 2.09871100  |
| C | 1.19429800   | 4.95879700  | 1.80571700  |
| C | -0.11923900  | 3.15144500  | 3.47567500  |
| H | -0.65495200  | 2.10900000  | 1.63903400  |
| C | 1.21871900   | 5.13455300  | 3.18591000  |
| H | 1.68877400   | 5.64805700  | 1.13220400  |
| C | 0.56265200   | 4.23471200  | 4.02170100  |
| H | -0.64123700  | 2.45738600  | 4.12492200  |
| H | 1.74493600   | 5.98479200  | 3.60425900  |
| H | 0.57204700   | 4.38654400  | 5.09466700  |
| C | -4.51638400  | 0.04074900  | -0.03488100 |
| C | -3.92136000  | -0.53425000 | -1.26883100 |
| H | -3.05777200  | -1.18156500 | -1.16160600 |
| H | -4.56747300  | -0.74331300 | -2.11362600 |
| C | -5.99196800  | 0.28834700  | 0.03235400  |
| C | -6.48506400  | 1.48712300  | 0.54493500  |
| C | -6.89211600  | -0.68166600 | -0.39885200 |
| C | -7.85264300  | 1.71437700  | 0.60966100  |
| H | -5.79056600  | 2.25945600  | 0.86353900  |
| C | -8.26137200  | -0.44934600 | -0.33472000 |
| H | -6.51205700  | -1.62110000 | -0.79018200 |
| C | -8.76250300  | 0.75250100  | 0.16592000  |
| H | -8.95422200  | -1.21084200 | -0.68077400 |
| C | -3.90379600  | -0.33616400 | 1.29547300  |
| H | -2.86234700  | -0.64014400 | 1.19173300  |
| H | -3.98213000  | 0.48543700  | 2.01284500  |
| F | -4.61447300  | -1.40768200 | 1.82093100  |
| H | -8.22359400  | 2.65898000  | 0.99633300  |
| C | -10.24669000 | 0.98350600  | 0.28279100  |
| C | -10.79185000 | 0.51254400  | 1.63677500  |
| H | -10.76909400 | 0.45553600  | -0.52139200 |
| H | -10.46726200 | 2.04808900  | 0.15480100  |

|   |              |             |            |
|---|--------------|-------------|------------|
| C | -12.29367600 | 0.74183600  | 1.78155200 |
| H | -10.56544600 | -0.55259900 | 1.76382700 |
| H | -10.25848500 | 1.03445300  | 2.43986300 |
| C | -12.82551500 | 0.26659200  | 3.13036500 |
| H | -12.51127200 | 1.80783200  | 1.65308300 |
| H | -12.81926600 | 0.22272700  | 0.97252800 |
| H | -13.89919400 | 0.43925000  | 3.22266000 |
| H | -12.64719000 | -0.80303700 | 3.26725300 |
| H | -12.33227300 | 0.79111100  | 3.95280800 |

### (11) IM<sub>2</sub>-PhCl

|                                               |            |             |                             |
|-----------------------------------------------|------------|-------------|-----------------------------|
| Zero-point correction =                       |            |             | 1.190820 (Hartree/Particle) |
| Thermal correction to Energy =                |            |             | 1.267224                    |
| Thermal correction to Enthalpy =              |            |             | 1.268168                    |
| Thermal correction to Gibbs Free Energy =     |            |             | 1.068822                    |
| Sum of electronic and zero-point Energies =   |            |             | -4996.893238                |
| Sum of electronic and thermal Energies =      |            |             | -4996.816834                |
| Sum of electronic and thermal Enthalpies =    |            |             | -4996.815890                |
| Sum of electronic and thermal Free Energies = |            |             | -4997.015235                |
| Au                                            | 0.60337700 | -1.47244900 | 0.39571500                  |
| Au                                            | 0.84018800 | 0.74286400  | -2.05303700                 |
| P                                             | 2.65272100 | -2.66010100 | 0.56631200                  |
| P                                             | 0.48837500 | 2.63749200  | -0.80973300                 |
| Cl                                            | 1.44904300 | -1.35153300 | -3.06478300                 |
| O                                             | 3.11402300 | 1.92311700  | -0.24593500                 |
| O                                             | 3.84422800 | -0.20289500 | -0.21362800                 |
| C                                             | 3.53572100 | -2.38358900 | 2.13698900                  |
| C                                             | 4.90240400 | -2.65339600 | 2.24971500                  |
| H                                             | 5.45609900 | -3.01890500 | 1.39048900                  |
| C                                             | 5.55422100 | -2.44279000 | 3.45948200                  |
| H                                             | 6.61455100 | -2.65117000 | 3.54346700                  |
| C                                             | 4.84634300 | -1.96668300 | 4.56009500                  |
| H                                             | 5.35589000 | -1.80482000 | 5.50309800                  |
| C                                             | 3.48540700 | -1.70029800 | 4.45082500                  |
| H                                             | 2.93202100 | -1.33250300 | 5.30772600                  |
| C                                             | 2.82983400 | -1.90237100 | 3.24021900                  |
| H                                             | 1.77238000 | -1.66983500 | 3.15055900                  |
| C                                             | 2.22457300 | -4.43379100 | 0.53161200                  |
| C                                             | 2.68611700 | -5.33872500 | 1.48530900                  |
| H                                             | 3.32113000 | -5.00239000 | 2.29758500                  |
| C                                             | 2.32565800 | -6.68092800 | 1.39621100                  |
| H                                             | 2.68351100 | -7.38292900 | 2.14045800                  |
| C                                             | 1.51550800 | -7.11970600 | 0.35664000                  |
| H                                             | 1.24024400 | -8.16591000 | 0.28915300                  |
| C                                             | 1.05604700 | -6.21634200 | -0.59983000                 |
| H                                             | 0.42909500 | -6.55859000 | -1.41511900                 |
| C                                             | 1.40147500 | -4.87464300 | -0.51094700                 |
| H                                             | 1.05120500 | -4.16760200 | -1.25996100                 |

|   |             |             |             |
|---|-------------|-------------|-------------|
| C | -1.21076300 | 3.24386200  | -0.59526500 |
| C | -2.26585800 | 2.62960200  | -1.26810000 |
| H | -2.06911500 | 1.79067300  | -1.93089000 |
| C | -3.56448800 | 3.10869000  | -1.10575300 |
| H | -4.38057200 | 2.64063000  | -1.64383100 |
| C | -3.80836800 | 4.19219900  | -0.27206800 |
| H | -4.81998100 | 4.56115300  | -0.14154800 |
| C | -2.75344000 | 4.81777600  | 0.38946300  |
| H | -2.94463800 | 5.66450100  | 1.03814800  |
| C | -1.45883800 | 4.35145400  | 0.22422200  |
| H | -0.63846700 | 4.84752100  | 0.73452400  |
| C | 1.47143100  | 4.06509900  | -1.38345000 |
| C | 2.09330000  | 4.93061000  | -0.48245500 |
| H | 2.00348700  | 4.76457700  | 0.58685600  |
| C | 2.85540900  | 5.99250300  | -0.95615400 |
| H | 3.34081600  | 6.66135200  | -0.25448200 |
| C | 2.99796600  | 6.19408700  | -2.32594000 |
| H | 3.59592200  | 7.02083500  | -2.69168500 |
| C | 2.37923100  | 5.33160500  | -3.22470900 |
| H | 2.49410400  | 5.48240000  | -4.29176700 |
| C | 1.62037200  | 4.26492500  | -2.75574800 |
| H | 1.15657600  | 3.57881100  | -3.45822400 |
| C | 3.92757500  | -2.48040300 | -0.71487800 |
| C | 4.41927200  | -1.19264400 | -0.95345300 |
| C | 5.43613700  | -0.96319400 | -1.87559800 |
| C | 5.93746300  | -2.05691900 | -2.57816400 |
| H | 6.71871200  | -1.88871100 | -3.31306100 |
| C | 5.45625200  | -3.34076700 | -2.36518000 |
| H | 5.85783800  | -4.17446500 | -2.92762700 |
| C | 4.45013400  | -3.55402200 | -1.42900500 |
| H | 4.07088600  | -4.55498300 | -1.25827000 |
| C | 1.10118700  | 2.28776200  | 0.86858200  |
| C | 2.44633200  | 1.90327400  | 0.94065600  |
| C | 3.05826100  | 1.54714800  | 2.13569000  |
| C | 2.26204600  | 1.54660800  | 3.28275200  |
| H | 2.71535700  | 1.26289700  | 4.22795500  |
| C | 0.91768800  | 1.89229200  | 3.23474200  |
| H | 0.31393400  | 1.85368000  | 4.13410100  |
| C | 0.33536000  | 2.27604500  | 2.02859100  |
| H | -0.71405800 | 2.54671800  | 1.99187000  |
| C | 4.51413800  | 1.14642500  | 2.14341500  |
| H | 4.57813100  | 0.07241000  | 2.33398600  |
| H | 5.02884900  | 1.64561700  | 2.96979500  |
| C | 5.93184800  | 0.44272900  | -2.09383300 |
| H | 6.84201800  | 0.61600200  | -1.50924300 |
| H | 6.20731500  | 0.57834500  | -3.14254800 |
| C | 4.28597700  | 1.14531200  | -0.34471900 |
| C | 5.21864100  | 1.48431600  | 0.82139500  |



|   |             |             |             |
|---|-------------|-------------|-------------|
| H | 6.10868600  | 0.85141400  | 0.72922900  |
| C | 5.63297100  | 2.95703700  | 0.71846600  |
| H | 6.34007400  | 3.18508300  | 1.52075500  |
| H | 4.75252300  | 3.59087000  | 0.88296800  |
| C | 6.24884100  | 3.28038300  | -0.64424500 |
| H | 6.48814000  | 4.34525300  | -0.69871200 |
| H | 7.20091100  | 2.74874100  | -0.74875500 |
| C | 5.30278500  | 2.91298900  | -1.79066400 |
| H | 4.41947900  | 3.55774600  | -1.74952700 |
| H | 5.78252900  | 3.09529400  | -2.75651100 |
| C | 4.84379300  | 1.45091000  | -1.73010100 |
| H | 4.00637100  | 1.30157000  | -2.42342400 |
| C | -1.32540800 | -0.81525400 | 0.30452000  |
| C | -2.11339600 | -0.14041500 | 1.43650600  |
| C | -2.22058600 | -0.86754500 | -0.75173400 |
| C | -3.46860500 | -0.26425300 | -0.36871900 |
| O | -1.74630100 | 0.11435600  | 2.55016000  |
| N | -3.38398700 | 0.14889200  | 0.92821100  |
| C | -2.04791600 | -1.35621200 | -2.07777200 |
| C | -4.51627100 | -0.13401100 | -1.27192000 |
| C | -3.07908800 | -1.21230100 | -2.96685400 |
| C | -4.29297200 | -0.60407900 | -2.55576200 |
| H | -5.08495000 | -0.49507100 | -3.28866500 |
| H | -5.46268200 | 0.30917900  | -0.98716300 |
| H | -2.97584700 | -1.55433500 | -3.98859000 |
| H | -1.09978500 | -1.80169000 | -2.36506600 |
| H | -4.08717100 | 0.68375200  | 1.42284300  |
| C | -4.54399600 | 3.45085400  | 2.98473200  |
| C | -3.25437300 | 3.08902400  | 3.34472200  |
| C | -5.00536000 | 4.75383300  | 3.10211500  |
| C | -2.40063700 | 4.07809200  | 3.82569200  |
| H | -2.91767800 | 2.06036100  | 3.26742200  |
| C | -4.14082000 | 5.72626500  | 3.59438400  |
| H | -6.02409600 | 4.99806200  | 2.82628100  |
| C | -2.83838000 | 5.39186700  | 3.95246600  |
| H | -1.38863500 | 3.81296300  | 4.11199400  |
| H | -4.49359600 | 6.74532900  | 3.70189600  |
| H | -2.16995900 | 6.15142000  | 4.34021800  |
| C | -3.32849400 | -2.87394400 | 1.82360800  |
| C | -2.07580300 | -3.25348400 | 1.51582600  |
| H | -1.29576800 | -3.26507200 | 2.26979600  |
| H | -1.78302300 | -3.60904100 | 0.53561200  |
| C | -4.44319000 | -2.87715300 | 0.85817300  |
| C | -5.66820500 | -2.26299500 | 1.17948200  |
| C | -4.33458900 | -3.48648200 | -0.39916900 |
| C | -6.72317300 | -2.26554400 | 0.28421500  |
| H | -5.81356100 | -1.81978200 | 2.15750400  |
| C | -5.39620500 | -3.48407400 | -1.29230700 |

|    |              |             |             |
|----|--------------|-------------|-------------|
| H  | -3.42471800  | -4.00562800 | -0.67699600 |
| C  | -6.61255600  | -2.88227400 | -0.96696100 |
| H  | -5.28709900  | -3.98358100 | -2.25026000 |
| C  | -3.60512000  | -2.39142800 | 3.22645000  |
| H  | -2.73242400  | -2.54256700 | 3.86253600  |
| H  | -3.86874500  | -1.32887200 | 3.24435900  |
| F  | -4.66483000  | -3.08883500 | 3.77526800  |
| H  | -7.66660900  | -1.81036600 | 0.57198300  |
| Cl | -5.64894400  | 2.22658500  | 2.37734400  |
| C  | -7.78806500  | -2.90160300 | -1.90807700 |
| C  | -8.04727100  | -1.54311700 | -2.57020600 |
| H  | -8.68393500  | -3.20117400 | -1.35390800 |
| H  | -7.63194700  | -3.65904500 | -2.68152100 |
| C  | -9.28290900  | -1.54887500 | -3.46659300 |
| H  | -8.15966200  | -0.77431000 | -1.79572200 |
| H  | -7.17043800  | -1.26052400 | -3.16426600 |
| C  | -9.52432800  | -0.19726600 | -4.13144300 |
| H  | -9.16976800  | -2.32386800 | -4.23199500 |
| H  | -10.15770300 | -1.83104700 | -2.87163600 |
| H  | -10.41014600 | -0.21656800 | -4.76799000 |
| H  | -9.67069600  | 0.58744100  | -3.38464600 |
| H  | -8.67476100  | 0.09153800  | -4.75612600 |

## (12) IM<sub>2</sub>-PhCl-1

|                                               |             |             |                             |
|-----------------------------------------------|-------------|-------------|-----------------------------|
| Zero-point correction =                       |             |             | 1.189270 (Hartree/Particle) |
| Thermal correction to Energy =                |             |             | 1.266226                    |
| Thermal correction to Enthalpy =              |             |             | 1.267170                    |
| Thermal correction to Gibbs Free Energy =     |             |             | 1.063661                    |
| Sum of electronic and zero-point Energies =   |             |             | -4996.888460                |
| Sum of electronic and thermal Energies =      |             |             | -4996.811504                |
| Sum of electronic and thermal Enthalpies =    |             |             | -4996.810560                |
| Sum of electronic and thermal Free Energies = |             |             | -4997.014069                |
| Au                                            | -0.37540100 | 1.22824500  | 0.30110000                  |
| Au                                            | -1.45554300 | -0.72197600 | -2.14225100                 |
| P                                             | -2.03423800 | 2.87975700  | 0.70227700                  |
| P                                             | -1.44025500 | -2.70853100 | -0.99911200                 |
| Cl                                            | -1.57187600 | 1.50285800  | -3.04088600                 |
| O                                             | -3.68499600 | -1.43386100 | 0.02503700                  |
| O                                             | -3.88849600 | 0.80079100  | 0.17430700                  |
| C                                             | -2.70062800 | 2.79541300  | 2.39663100                  |
| C                                             | -3.91767800 | 3.39964300  | 2.72167200                  |
| H                                             | -4.48201200 | 3.91666400  | 1.95137700                  |
| C                                             | -4.41050000 | 3.32867500  | 4.01710300                  |
| H                                             | -5.35253100 | 3.79063700  | 4.26156300                  |
| C                                             | -3.68022600 | 2.65494000  | 5.00262200                  |
| H                                             | -4.06658700 | 2.60623700  | 6.01318700                  |
| C                                             | -2.46639700 | 2.05589900  | 4.68731200                  |
| H                                             | -1.89835500 | 1.53695400  | 5.44569700                  |

|   |             |             |             |
|---|-------------|-------------|-------------|
| C | -1.97225800 | 2.12698500  | 3.38549900  |
| H | -1.04082700 | 1.62966400  | 3.13598700  |
| C | -1.19499500 | 4.49389700  | 0.55437900  |
| C | -1.19584400 | 5.44105600  | 1.58030200  |
| H | -1.71621700 | 5.23858900  | 2.50876200  |
| C | -0.52180600 | 6.64443400  | 1.40222900  |
| H | -0.52716900 | 7.38301100  | 2.20491900  |
| C | 0.14575900  | 6.90450400  | 0.21737600  |
| H | 0.66914100  | 7.84848800  | 0.08110300  |
| C | 0.14800200  | 5.95952000  | -0.80663500 |
| H | 0.66480700  | 6.17044000  | -1.73764700 |
| C | -0.51023000 | 4.75209200  | -0.63645500 |
| H | -0.51955300 | 4.00989200  | -1.43691300 |
| C | 0.05250800  | -3.74923400 | -1.09427200 |
| C | 1.12355600  | -3.37938100 | -1.90778800 |
| H | 1.07810900  | -2.45944500 | -2.48302200 |
| C | 2.23896500  | -4.21493300 | -1.99828700 |
| H | 3.06238900  | -3.93839700 | -2.64978400 |
| C | 2.28970300  | -5.39782200 | -1.28417000 |
| H | 3.15640400  | -6.04461800 | -1.36011100 |
| C | 1.22043600  | -5.76458400 | -0.46541800 |
| H | 1.25321400  | -6.69843100 | 0.09018200  |
| C | 0.10235500  | -4.94857100 | -0.38155100 |
| H | -0.73408800 | -5.25360900 | 0.23944000  |
| C | -2.83536200 | -3.81150200 | -1.42173800 |
| C | -3.47882900 | -4.56737100 | -0.44267300 |
| H | -3.16960700 | -4.49930400 | 0.59273700  |
| C | -4.54264700 | -5.38914000 | -0.79564700 |
| H | -5.04705100 | -5.97580500 | -0.03138600 |
| C | -4.96245100 | -5.46287200 | -2.11769900 |
| H | -5.79601500 | -6.09977500 | -2.39381200 |
| C | -4.32509200 | -4.70134600 | -3.09803900 |
| H | -4.65112800 | -4.74664600 | -4.12569900 |
| C | -3.26244600 | -3.87518700 | -2.74425100 |
| H | -2.77313100 | -3.27353400 | -3.50539900 |
| C | -3.49901800 | 3.03695100  | -0.35214100 |
| C | -4.32000400 | 1.91049700  | -0.47882900 |
| C | -5.50492600 | 1.95261900  | -1.20421900 |
| C | -5.84126700 | 3.14351400  | -1.83984800 |
| H | -6.75555600 | 3.18322900  | -2.42436400 |
| C | -5.03794300 | 4.27352200  | -1.74097100 |
| H | -5.31592200 | 5.18643200  | -2.24617400 |
| C | -3.85907500 | 4.21992500  | -0.99354300 |
| H | -3.23371300 | 5.09918900  | -0.91524100 |
| C | -1.65460000 | -2.31399000 | 0.76229000  |
| C | -2.83007200 | -1.61719700 | 1.07340300  |
| C | -3.11687700 | -1.17158700 | 2.35836300  |
| C | -2.15914400 | -1.41178800 | 3.34675600  |

|   |             |             |             |
|---|-------------|-------------|-------------|
| H | -2.35492400 | -1.06945700 | 4.35014100  |
| C | -0.96958300 | -2.07909100 | 3.05696700  |
| H | -0.23576800 | -2.23602400 | 3.83402700  |
| C | -0.72138300 | -2.53758000 | 1.76964600  |
| H | 0.20346100  | -3.06000400 | 1.54361200  |
| C | -4.41345500 | -0.43985400 | 2.62424500  |
| H | -4.18535400 | 0.61375100  | 2.80497500  |
| H | -4.86533100 | -0.82370700 | 3.53904100  |
| C | -6.35472400 | 0.70879900  | -1.29695500 |
| H | -7.15405800 | 0.75369800  | -0.54955000 |
| H | -6.85372900 | 0.67267400  | -2.27577000 |
| C | -4.64205900 | -0.40923800 | 0.13522800  |
| C | -5.39924400 | -0.56551800 | 1.45424900  |
| H | -6.12476800 | 0.25335400  | 1.52297000  |
| C | -6.15223300 | -1.90288300 | 1.44414200  |
| H | -6.72946600 | -1.99443500 | 2.36754800  |
| H | -5.42537900 | -2.72435000 | 1.43989200  |
| C | -7.06727300 | -2.02127700 | 0.22614700  |
| H | -7.55621800 | -2.99847800 | 0.22402900  |
| H | -7.87204600 | -1.27930500 | 0.29838000  |
| C | -6.28662000 | -1.84486400 | -1.08126000 |
| H | -5.58378000 | -2.67690700 | -1.19316200 |
| H | -6.95754400 | -1.88534000 | -1.94317900 |
| C | -5.49629000 | -0.53208600 | -1.12124100 |
| H | -4.77894000 | -0.57134100 | -1.95658500 |
| C | 1.31160100  | 0.11503200  | 0.06263000  |
| C | 2.06335100  | -0.61849000 | 1.18305400  |
| C | 2.07467600  | -0.11929700 | -1.06951000 |
| C | 3.19361500  | -0.96497900 | -0.74130800 |
| O | 1.79704900  | -0.66172000 | 2.35149700  |
| N | 3.15529500  | -1.26555600 | 0.58362500  |
| C | 1.88853900  | 0.32244100  | -2.41208400 |
| C | 4.10506900  | -1.36268700 | -1.71267600 |
| C | 2.78911000  | -0.07594600 | -3.36363100 |
| C | 3.89081300  | -0.89921700 | -3.00511500 |
| H | 4.59636200  | -1.18715100 | -3.77483500 |
| H | 4.95975000  | -1.98151500 | -1.46783500 |
| H | 2.67749700  | 0.24212900  | -4.38918800 |
| H | 1.04410400  | 0.95946200  | -2.65639600 |
| H | 3.86027000  | -1.78276800 | 1.10118700  |
| C | 5.46744700  | -2.50456600 | 4.01233500  |
| C | 4.18288400  | -2.16136400 | 4.41342900  |
| C | 6.40537900  | -3.03098400 | 4.89027400  |
| C | 3.83581200  | -2.35451400 | 5.74807600  |
| H | 3.46747500  | -1.74722700 | 3.70778500  |
| C | 6.03836500  | -3.22273800 | 6.21438200  |
| H | 7.39560800  | -3.29219000 | 4.53385100  |
| C | 4.75731100  | -2.89103100 | 6.64979800  |

|    |             |             |             |
|----|-------------|-------------|-------------|
| H  | 2.83989800  | -2.08941600 | 6.07496900  |
| H  | 6.75495300  | -3.63598200 | 6.91810800  |
| C  | 3.91563500  | 1.81121300  | 1.15321300  |
| C  | 2.72962500  | 2.43162700  | 1.01573400  |
| H  | 2.09810600  | 2.62098600  | 1.87396800  |
| H  | 2.36238800  | 2.81674000  | 0.07261200  |
| C  | 4.83027400  | 1.54776100  | 0.02433000  |
| C  | 5.97064200  | 0.74583100  | 0.21529900  |
| C  | 4.60765400  | 2.06519500  | -1.25628400 |
| C  | 6.82511800  | 0.45288900  | -0.83623500 |
| H  | 6.21692000  | 0.37205600  | 1.20411200  |
| C  | 5.45854900  | 1.77076500  | -2.30630100 |
| H  | 3.75746000  | 2.71140300  | -1.44736500 |
| C  | 6.57478300  | 0.94655800  | -2.12048900 |
| H  | 5.26306600  | 2.18741500  | -3.29187500 |
| C  | 4.31501600  | 1.32267800  | 2.52210200  |
| H  | 3.58114300  | 1.62678800  | 3.26983500  |
| H  | 4.41338800  | 0.23283600  | 2.54726400  |
| F  | 5.53911800  | 1.85338500  | 2.88242700  |
| H  | 7.70193200  | -0.15819200 | -0.66172900 |
| C  | 7.53476800  | 0.68374000  | -3.25363600 |
| H  | 6.99166000  | 0.66404500  | -4.20412600 |
| H  | 7.99242600  | -0.30260400 | -3.13393800 |
| C  | 8.63425900  | 1.74770500  | -3.32752000 |
| C  | 9.62126900  | 1.50225100  | -4.46554900 |
| H  | 9.17650200  | 1.77174900  | -2.36830700 |
| H  | 8.17325100  | 2.73920800  | -3.44075700 |
| C  | 10.70355700 | 2.57008100  | -4.53641700 |
| H  | 10.07437900 | 0.51080800  | -4.34785300 |
| H  | 9.07008100  | 1.47465400  | -5.41423900 |
| H  | 11.40169900 | 2.38509400  | -5.35372200 |
| H  | 10.27023400 | 3.56117000  | -4.67736000 |
| H  | 11.28595600 | 2.59630000  | -3.61019400 |
| H  | 4.47676300  | -3.03738200 | 7.68902400  |
| Cl | 5.94487300  | -2.26832600 | 2.32498800  |

### (13) TS<sub>2-3</sub>-PhCl

|                                               |             |             |                             |
|-----------------------------------------------|-------------|-------------|-----------------------------|
| Zero-point correction =                       |             |             | 1.185613 (Hartree/Particle) |
| Thermal correction to Energy =                |             |             | 1.262440                    |
| Thermal correction to Enthalpy =              |             |             | 1.263384                    |
| Thermal correction to Gibbs Free Energy =     |             |             | 1.058914                    |
| Sum of electronic and zero-point Energies =   |             |             | -4996.866958                |
| Sum of electronic and thermal Energies =      |             |             | -4996.790132                |
| Sum of electronic and thermal Enthalpies =    |             |             | -4996.789188                |
| Sum of electronic and thermal Free Energies = |             |             | -4996.993658                |
| Au                                            | -0.19734600 | 1.63892400  | -0.20950300                 |
| Au                                            | -1.31493900 | -1.24829600 | -2.12150100                 |
| P                                             | -2.15379700 | 3.01273800  | -0.01461700                 |

|    |             |             |             |
|----|-------------|-------------|-------------|
| P  | -1.45676100 | -3.07645000 | -0.70418400 |
| Cl | -1.15967400 | 0.65924000  | -3.55389600 |
| O  | -3.58692300 | -1.51710000 | 0.47667100  |
| O  | -4.01097100 | 0.72914500  | 0.40047300  |
| C  | -2.53639100 | 3.36722700  | 1.74800600  |
| C  | -3.75325000 | 3.94811600  | 2.12745000  |
| H  | -4.50766800 | 4.16725700  | 1.38082000  |
| C  | -4.00517500 | 4.24055100  | 3.46526600  |
| H  | -4.95010500 | 4.69207700  | 3.74868200  |
| C  | -3.04432600 | 3.96067400  | 4.43762000  |
| H  | -3.24036000 | 4.19320700  | 5.47867700  |
| C  | -1.83327300 | 3.38177400  | 4.06724900  |
| H  | -1.08398500 | 3.15495700  | 4.81823600  |
| C  | -1.58101600 | 3.08034800  | 2.73090100  |
| H  | -0.64117800 | 2.60936500  | 2.45365700  |
| C  | -1.56194700 | 4.60680400  | -0.72472800 |
| C  | -1.61366200 | 5.81657000  | -0.02576400 |
| H  | -2.02799300 | 5.85409000  | 0.97390800  |
| C  | -1.12367400 | 6.98434900  | -0.61065100 |
| H  | -1.16588900 | 7.91801700  | -0.05964500 |
| C  | -0.58794800 | 6.95237700  | -1.89522300 |
| H  | -0.21244200 | 7.86343700  | -2.35108200 |
| C  | -0.53278900 | 5.74794100  | -2.59768000 |
| H  | -0.12051200 | 5.72130400  | -3.60088700 |
| C  | -1.00821600 | 4.57688600  | -2.01557800 |
| H  | -0.96146100 | 3.64213100  | -2.56676900 |
| C  | -0.01196100 | -4.20429200 | -0.81686300 |
| C  | 1.11557200  | -3.81958100 | -1.54820900 |
| H  | 1.13840700  | -2.85246400 | -2.03796200 |
| C  | 2.20242500  | -4.68425500 | -1.66737600 |
| H  | 3.06646100  | -4.37963900 | -2.24926000 |
| C  | 2.17190500  | -5.93609000 | -1.06061600 |
| H  | 3.01492000  | -6.61155000 | -1.16177900 |
| C  | 1.05100800  | -6.32655800 | -0.32999100 |
| H  | 1.01664300  | -7.30375000 | 0.13920200  |
| C  | -0.03746200 | -5.46901700 | -0.21017400 |
| H  | -0.91074700 | -5.79525200 | 0.34168500  |
| C  | -2.89737200 | -4.16516400 | -1.01843500 |
| C  | -3.49321000 | -4.90760700 | 0.01053400  |
| H  | -3.15629400 | -4.78800200 | 1.03406900  |
| C  | -4.53292800 | -5.79033000 | -0.27685700 |
| H  | -4.98867200 | -6.36142500 | 0.52276600  |
| C  | -4.98532800 | -5.93527800 | -1.58547500 |
| H  | -5.79465500 | -6.62424700 | -1.80881800 |
| C  | -4.40347000 | -5.19091100 | -2.60936700 |
| H  | -4.75644300 | -5.29512500 | -3.62995600 |
| C  | -3.36302800 | -4.30779100 | -2.32900300 |
| H  | -2.91683100 | -3.72635800 | -3.13034800 |

|   |             |             |             |
|---|-------------|-------------|-------------|
| C | -3.78846300 | 2.75116200  | -0.80586100 |
| C | -4.56239100 | 1.61979100  | -0.48023400 |
| C | -5.85261300 | 1.46084100  | -0.99413000 |
| C | -6.34670200 | 2.41924000  | -1.87728200 |
| H | -7.34251000 | 2.28786500  | -2.29034000 |
| C | -5.59239200 | 3.53264700  | -2.22971100 |
| H | -5.98582100 | 4.27130700  | -2.91864000 |
| C | -4.32316600 | 3.69754200  | -1.68612000 |
| H | -3.74358900 | 4.57111200  | -1.94941100 |
| C | -1.54683200 | -2.53335800 | 1.04224500  |
| C | -2.62032300 | -1.71208700 | 1.42880100  |
| C | -2.70241400 | -1.16576300 | 2.70994100  |
| C | -1.67887100 | -1.45969200 | 3.61269900  |
| H | -1.73456300 | -1.04753100 | 4.61495400  |
| C | -0.60291300 | -2.26597900 | 3.25469000  |
| H | 0.18262400  | -2.48009200 | 3.97005600  |
| C | -0.53528700 | -2.79906800 | 1.97042200  |
| H | 0.30628300  | -3.42071500 | 1.68921700  |
| C | -3.86626800 | -0.27126400 | 3.05914000  |
| H | -3.55912300 | 0.77551900  | 2.96343800  |
| H | -4.15341100 | -0.41733900 | 4.10474500  |
| C | -6.64774400 | 0.25326700  | -0.58255900 |
| H | -7.25062000 | 0.48184300  | 0.30429100  |
| H | -7.35772600 | -0.01486800 | -1.37006700 |
| C | -4.61954700 | -0.55519300 | 0.67975900  |
| C | -5.07647100 | -0.53869000 | 2.14973500  |
| H | -5.77673900 | 0.29818700  | 2.25057000  |
| C | -5.81427000 | -1.83974400 | 2.52092500  |
| H | -6.19008400 | -1.74701500 | 3.54407500  |
| H | -5.10452400 | -2.67592800 | 2.52983600  |
| C | -6.96009900 | -2.14848600 | 1.55475700  |
| H | -7.42830100 | -3.10340600 | 1.82065600  |
| H | -7.74505100 | -1.39160400 | 1.65640800  |
| C | -6.45522600 | -2.21065600 | 0.10856800  |
| H | -5.77882000 | -3.06404100 | -0.00052800 |
| H | -7.28467900 | -2.38757500 | -0.58210200 |
| C | -5.71400500 | -0.93488700 | -0.32822200 |
| H | -5.18992600 | -1.14234800 | -1.26708400 |
| C | 1.74843200  | 0.93059300  | -0.15254400 |
| C | 2.37859000  | 0.50536200  | 1.17698500  |
| C | 2.49143000  | 0.20744000  | -1.14126100 |
| C | 3.50259600  | -0.56196500 | -0.50226600 |
| O | 2.05723700  | 0.83105200  | 2.30250800  |
| N | 3.41951100  | -0.35669800 | 0.86730200  |
| C | 2.34059700  | 0.12868800  | -2.53825400 |
| C | 4.35707100  | -1.39029100 | -1.21755800 |
| C | 3.19822100  | -0.69147700 | -3.25922200 |
| C | 4.19392700  | -1.43146000 | -2.60217100 |

|    |             |             |             |
|----|-------------|-------------|-------------|
| H  | 4.84984900  | -2.06742400 | -3.18801800 |
| H  | 5.12030200  | -1.98312200 | -0.72593800 |
| H  | 3.09010800  | -0.77011300 | -4.33592900 |
| H  | 1.54516600  | 0.67793500  | -3.02986500 |
| H  | 4.00361000  | -0.78981000 | 1.57121500  |
| C  | 4.60693600  | -1.66162600 | 4.92526700  |
| C  | 3.38004100  | -1.02506900 | 5.07197700  |
| C  | 5.10604400  | -2.54045000 | 5.87939600  |
| C  | 2.63445500  | -1.28923000 | 6.22226200  |
| H  | 3.00913900  | -0.34423800 | 4.31513000  |
| C  | 4.34502300  | -2.78731300 | 7.02061500  |
| H  | 6.06816300  | -3.01740700 | 5.73764000  |
| C  | 3.11136900  | -2.16489600 | 7.19453200  |
| H  | 1.67838600  | -0.79152900 | 6.35604700  |
| H  | 4.72461000  | -3.46946800 | 7.77457000  |
| H  | 2.52677300  | -2.35680300 | 8.08785200  |
| C  | 3.89509300  | 2.87294200  | 0.34249400  |
| C  | 2.65361200  | 2.97701700  | -0.26391000 |
| H  | 1.86917400  | 3.51181100  | 0.25047800  |
| H  | 2.53959500  | 2.93399100  | -1.33558700 |
| C  | 5.07551400  | 2.39597200  | -0.34944200 |
| C  | 6.22941100  | 1.97118900  | 0.35963000  |
| C  | 5.12277200  | 2.32708200  | -1.75922500 |
| C  | 7.34190800  | 1.50024800  | -0.30968100 |
| H  | 6.25328000  | 2.02939800  | 1.43896300  |
| C  | 6.24794600  | 1.85969900  | -2.42021500 |
| H  | 4.28998600  | 2.68762900  | -2.35135000 |
| C  | 7.37957700  | 1.43642700  | -1.71252300 |
| H  | 6.25701500  | 1.84253300  | -3.50537900 |
| C  | 3.95751700  | 3.23915300  | 1.80964700  |
| H  | 3.13264600  | 3.90078200  | 2.07012300  |
| H  | 3.89133400  | 2.35078600  | 2.44747400  |
| F  | 5.14017900  | 3.90423600  | 2.12691400  |
| H  | 8.21288400  | 1.18785300  | 0.25942100  |
| Cl | 5.58811700  | -1.33903400 | 3.48150100  |
| C  | 8.60250700  | 0.92188900  | -2.43018500 |
| C  | 8.59825700  | -0.61238700 | -2.59540700 |
| H  | 9.49813600  | 1.21722100  | -1.87967700 |
| H  | 8.67241200  | 1.38937700  | -3.41841800 |
| C  | 9.84811100  | -1.13633200 | -3.31132600 |
| H  | 8.51576800  | -1.08442900 | -1.61082800 |
| H  | 7.70014300  | -0.91129500 | -3.15111300 |
| C  | 9.84806500  | -2.65686500 | -3.47905400 |
| H  | 9.92941600  | -0.65952800 | -4.29429100 |
| H  | 10.73938400 | -0.82899800 | -2.75145500 |
| H  | 10.75102500 | -2.99950000 | -3.99124400 |
| H  | 9.80833900  | -3.16770200 | -2.51208100 |
| H  | 8.99017400  | -2.99700900 | -4.06854300 |



**(14) IM<sub>3</sub>-PhCl**

|                                               |             |             |                             |
|-----------------------------------------------|-------------|-------------|-----------------------------|
| Zero-point correction =                       |             |             | 1.191562 (Hartree/Particle) |
| Thermal correction to Energy =                |             |             | 1.267523                    |
| Thermal correction to Enthalpy =              |             |             | 1.268467                    |
| Thermal correction to Gibbs Free Energy =     |             |             | 1.067528                    |
| Sum of electronic and zero-point Energies =   |             |             | -4996.911816                |
| Sum of electronic and thermal Energies =      |             |             | -4996.835855                |
| Sum of electronic and thermal Enthalpies =    |             |             | -4996.834911                |
| Sum of electronic and thermal Free Energies = |             |             | -4997.035850                |
| Au                                            | 0.14602600  | -1.26670300 | -1.34906500                 |
| Au                                            | 1.98202900  | 1.40677000  | -1.09288800                 |
| P                                             | 0.02628300  | -3.07990000 | 0.03141800                  |
| P                                             | 3.38911700  | 2.07753300  | 0.57247100                  |
| Cl                                            | 0.53039500  | 0.61281200  | -2.93926100                 |
| O                                             | 3.99707300  | -0.70668000 | 0.64154900                  |
| O                                             | 2.82106500  | -2.54100600 | 0.17357600                  |
| C                                             | 0.17514000  | -2.65633800 | 1.78663100                  |
| C                                             | 0.35602700  | -3.66614400 | 2.73353100                  |
| H                                             | 0.47600500  | -4.69748500 | 2.41352700                  |
| C                                             | 0.37246700  | -3.34647200 | 4.08654700                  |
| H                                             | 0.50555900  | -4.12904200 | 4.82466200                  |
| C                                             | 0.19967900  | -2.02506500 | 4.48961000                  |
| H                                             | 0.19922100  | -1.77989600 | 5.54607200                  |
| C                                             | 0.02948400  | -1.01859100 | 3.54490900                  |
| H                                             | -0.08809300 | 0.01148300  | 3.86048900                  |
| C                                             | 0.02556500  | -1.32798200 | 2.19004300                  |
| H                                             | -0.11715100 | -0.54312600 | 1.45142400                  |
| C                                             | -1.56861400 | -3.92680700 | -0.17994300                 |
| C                                             | -2.46568600 | -4.05817300 | 0.87802400                  |
| H                                             | -2.19580300 | -3.75041900 | 1.88076900                  |
| C                                             | -3.75596000 | -4.52605300 | 0.63764000                  |
| H                                             | -4.45872600 | -4.58144200 | 1.46015100                  |
| C                                             | -4.13673000 | -4.89524300 | -0.64518200                 |
| H                                             | -5.14054400 | -5.26134100 | -0.82791700                 |
| C                                             | -3.23492900 | -4.78034300 | -1.70368700                 |
| H                                             | -3.53343000 | -5.05887500 | -2.70765300                 |
| C                                             | -1.96145700 | -4.28054400 | -1.47820100                 |
| H                                             | -1.27784800 | -4.14274500 | -2.31148400                 |
| C                                             | 3.01414700  | 3.75243500  | 1.15907400                  |
| C                                             | 1.67359300  | 4.07169800  | 1.38849700                  |
| H                                             | 0.89549700  | 3.34334600  | 1.17556700                  |
| C                                             | 1.33167900  | 5.31889800  | 1.89297300                  |
| H                                             | 0.28883900  | 5.55920300  | 2.07246700                  |
| C                                             | 2.32917300  | 6.25587400  | 2.15137900                  |
| H                                             | 2.06348700  | 7.23433400  | 2.53481000                  |
| C                                             | 3.66294300  | 5.94433200  | 1.91154500                  |
| H                                             | 4.43618700  | 6.67878800  | 2.10446100                  |

|   |            |             |             |
|---|------------|-------------|-------------|
| C | 4.01258900 | 4.69014000  | 1.42041200  |
| H | 5.05388800 | 4.45138500  | 1.23332700  |
| C | 5.14639800 | 2.03426400  | 0.10051200  |
| C | 6.12769700 | 1.81628200  | 1.07078200  |
| H | 5.84652700 | 1.67223200  | 2.10960600  |
| C | 7.46734400 | 1.77309400  | 0.70213900  |
| H | 8.22760200 | 1.60435600  | 1.45635600  |
| C | 7.83020600 | 1.94872800  | -0.63053900 |
| H | 8.87531300 | 1.91319300  | -0.91620200 |
| C | 6.85366300 | 2.16934600  | -1.59643700 |
| H | 7.13433900 | 2.30484500  | -2.63423900 |
| C | 5.51121400 | 2.20953300  | -1.23396700 |
| H | 4.74922900 | 2.36821000  | -1.99098600 |
| C | 1.33750500 | -4.24892600 | -0.43144000 |
| C | 2.64264700 | -3.73189900 | -0.45723800 |
| C | 3.66469800 | -4.37775800 | -1.14579200 |
| C | 3.38926300 | -5.63548000 | -1.68388100 |
| H | 4.18008700 | -6.15903900 | -2.21279800 |
| C | 2.13395700 | -6.21655500 | -1.57077700 |
| H | 1.95077300 | -7.20115900 | -1.98289000 |
| C | 1.09467400 | -5.50698800 | -0.97473800 |
| H | 0.09424700 | -5.92384700 | -0.94822100 |
| C | 3.28128100 | 1.02343300  | 2.04865300  |
| C | 3.60119900 | -0.33128400 | 1.89725200  |
| C | 3.59254700 | -1.20038500 | 2.98679700  |
| C | 3.26908000 | -0.67903400 | 4.23653600  |
| H | 3.27678900 | -1.34705900 | 5.09249800  |
| C | 2.94501700 | 0.66005900  | 4.40686700  |
| H | 2.70236700 | 1.04335300  | 5.39070700  |
| C | 2.94991400 | 1.51454500  | 3.31040600  |
| H | 2.71562100 | 2.56526400  | 3.43723800  |
| C | 3.96315600 | -2.64477600 | 2.78342700  |
| H | 3.05155900 | -3.24029200 | 2.67274500  |
| H | 4.49178300 | -3.02204500 | 3.66293100  |
| C | 4.99276900 | -3.68717600 | -1.34374700 |
| H | 5.77370100 | -4.22686500 | -0.80093100 |
| H | 5.26593400 | -3.74396800 | -2.40090000 |
| C | 4.15751500 | -2.07760500 | 0.36550600  |
| C | 4.83818500 | -2.78875200 | 1.54127200  |
| H | 4.92738300 | -3.85004800 | 1.29021700  |
| C | 6.24067600 | -2.18802500 | 1.73535200  |
| H | 6.74383700 | -2.72416100 | 2.54471000  |
| H | 6.14142900 | -1.14788300 | 2.06641300  |
| C | 7.08952100 | -2.23167200 | 0.46222500  |
| H | 8.02541300 | -1.69263500 | 0.62969500  |
| H | 7.37353500 | -3.26624700 | 0.24589500  |
| C | 6.35661200 | -1.61275800 | -0.73267100 |
| H | 6.25510800 | -0.53507500 | -0.57715500 |

|    |             |             |             |
|----|-------------|-------------|-------------|
| H  | 6.93683100  | -1.74934500 | -1.64978800 |
| C  | 4.95740700  | -2.20823600 | -0.92481400 |
| H  | 4.40773200  | -1.63628300 | -1.68179500 |
| C  | -3.58932600 | -0.03231100 | -1.57496100 |
| C  | -2.50048200 | 0.86345300  | -1.16683100 |
| C  | -4.08221700 | 0.44551600  | -2.79893900 |
| C  | -3.34202100 | 1.61896400  | -3.13295700 |
| O  | -1.75863800 | 0.76883300  | -0.18842700 |
| N  | -2.43636000 | 1.86592000  | -2.12109800 |
| C  | -5.09531200 | -0.00382800 | -3.67099700 |
| C  | -3.58092500 | 2.32193700  | -4.30128900 |
| C  | -5.33585200 | 0.70094500  | -4.83163000 |
| C  | -4.58351500 | 1.84868400  | -5.14289700 |
| H  | -4.79121100 | 2.38069600  | -6.06396700 |
| H  | -3.00984800 | 3.20821100  | -4.55126400 |
| H  | -6.10716700 | 0.37054000  | -5.51641700 |
| H  | -5.66669700 | -0.89544600 | -3.43445200 |
| H  | -1.65184000 | 2.49938400  | -2.18568500 |
| C  | -0.94277900 | 4.94618300  | -0.51454700 |
| C  | -1.60097400 | 4.10819100  | 0.37513500  |
| C  | -1.05047900 | 6.32737400  | -0.44721800 |
| C  | -2.38840800 | 4.68513100  | 1.36767400  |
| H  | -1.50133000 | 3.02927100  | 0.29932700  |
| C  | -1.84225600 | 6.88537800  | 0.55096200  |
| H  | -0.52029900 | 6.94903800  | -1.15789800 |
| C  | -2.50870200 | 6.06835800  | 1.45932200  |
| H  | -2.91498500 | 4.04397100  | 2.06510300  |
| H  | -1.93832100 | 7.96311100  | 0.61407300  |
| H  | -3.12767200 | 6.50894800  | 2.23182800  |
| C  | -4.40210800 | -0.90203700 | 0.64395200  |
| C  | -4.00900300 | -1.22442700 | -0.77651800 |
| H  | -3.17221400 | -1.93140600 | -0.75177000 |
| H  | -4.82522700 | -1.73685600 | -1.29436200 |
| C  | -5.69980400 | -0.38893000 | 0.95337800  |
| C  | -6.12516500 | -0.24220000 | 2.29486900  |
| C  | -6.60778800 | 0.00472700  | -0.05761600 |
| C  | -7.37591900 | 0.26509000  | 2.59462100  |
| H  | -5.47491100 | -0.56517100 | 3.09932500  |
| C  | -7.85190600 | 0.51586500  | 0.25952700  |
| H  | -6.31929100 | -0.05998400 | -1.10077200 |
| C  | -8.26470800 | 0.65657200  | 1.58877000  |
| H  | -8.52103000 | 0.82452200  | -0.53868600 |
| C  | -3.37196400 | -1.03998700 | 1.71087400  |
| H  | -2.40581700 | -1.30150100 | 1.28434200  |
| H  | -3.25871100 | -0.12008900 | 2.29223900  |
| F  | -3.70631700 | -2.04558800 | 2.63743800  |
| H  | -7.67867800 | 0.35700600  | 3.63345600  |
| Cl | 0.08035500  | 4.23899300  | -1.75250300 |

|   |              |             |            |
|---|--------------|-------------|------------|
| C | -9.64615800  | 1.15636800  | 1.91423900 |
| C | -10.70525200 | 0.05604000  | 1.76373000 |
| H | -9.90287400  | 1.99309200  | 1.25569100 |
| H | -9.66928800  | 1.54308800  | 2.93784100 |
| C | -12.11185000 | 0.53993300  | 2.10479800 |
| H | -10.68435000 | -0.32420200 | 0.73565700 |
| H | -10.43773000 | -0.79040800 | 2.40666100 |
| C | -13.16020000 | -0.55479900 | 1.92924600 |
| H | -12.12796400 | 0.90520900  | 3.13746100 |
| H | -12.36405800 | 1.39862900  | 1.47282300 |
| H | -14.15942800 | -0.20003800 | 2.18762900 |
| H | -13.18936100 | -0.90717900 | 0.89500100 |
| H | -12.93773500 | -1.41561700 | 2.56506800 |

### (15) IM<sub>4</sub>-PhCl

|                                               |             |             |                             |
|-----------------------------------------------|-------------|-------------|-----------------------------|
| Zero-point correction =                       |             |             | 1.194531 (Hartree/Particle) |
| Thermal correction to Energy =                |             |             | 1.269742                    |
| Thermal correction to Enthalpy =              |             |             | 1.270686                    |
| Thermal correction to Gibbs Free Energy =     |             |             | 1.073754                    |
| Sum of electronic and zero-point Energies =   |             |             | -4996.966156                |
| Sum of electronic and thermal Energies =      |             |             | -4996.890946                |
| Sum of electronic and thermal Enthalpies =    |             |             | -4996.890002                |
| Sum of electronic and thermal Free Energies = |             |             | -4997.086933                |
| Au                                            | 0.20455700  | -1.24228000 | -1.42606400                 |
| Au                                            | 2.07785500  | 1.39283600  | -1.08382300                 |
| P                                             | -0.00897200 | -3.05432200 | -0.05373500                 |
| P                                             | 3.52099900  | 1.97271000  | 0.58657400                  |
| Cl                                            | 0.59789700  | 0.69687300  | -2.94803600                 |
| O                                             | 4.02718300  | -0.83304100 | 0.63381300                  |
| O                                             | 2.79644500  | -2.62442000 | 0.14356100                  |
| C                                             | 0.11140600  | -2.62582000 | 1.70319000                  |
| C                                             | 0.27061000  | -3.63211100 | 2.65722900                  |
| H                                             | 0.38757400  | -4.66597300 | 2.34436600                  |
| C                                             | 0.27248900  | -3.30536100 | 4.00885500                  |
| H                                             | 0.39221900  | -4.08500800 | 4.75247200                  |
| C                                             | 0.10696800  | -1.98035100 | 4.40317200                  |
| H                                             | 0.10037000  | -1.72892100 | 5.45818900                  |
| C                                             | -0.04646500 | -0.97829700 | 3.45095200                  |
| H                                             | -0.15859500 | 0.05435700  | 3.76028500                  |
| C                                             | -0.03940100 | -1.29466900 | 2.09700400                  |
| H                                             | -0.16411400 | -0.51309300 | 1.35251100                  |
| C                                             | -1.63598200 | -3.83427800 | -0.28345100                 |
| C                                             | -2.57707700 | -3.85735700 | 0.74369400                  |
| H                                             | -2.32986400 | -3.49689800 | 1.73504000                  |
| C                                             | -3.87378300 | -4.29661300 | 0.48386600                  |
| H                                             | -4.60625900 | -4.27989200 | 1.28209800                  |
| C                                             | -4.22414300 | -4.72640400 | -0.78836800                 |
| H                                             | -5.23293000 | -5.07131500 | -0.98645300                 |

|   |             |             |             |
|---|-------------|-------------|-------------|
| C | -3.28461800 | -4.70043400 | -1.81962100 |
| H | -3.56106400 | -5.02030600 | -2.81751400 |
| C | -1.99986400 | -4.24169200 | -1.57439400 |
| H | -1.28345300 | -4.17872300 | -2.38881500 |
| C | 3.23436700  | 3.65794600  | 1.19528800  |
| C | 1.91345300  | 4.03221500  | 1.45210100  |
| H | 1.10451300  | 3.33507700  | 1.25327200  |
| C | 1.63153300  | 5.28964100  | 1.96738600  |
| H | 0.60312700  | 5.57066900  | 2.16991500  |
| C | 2.67164000  | 6.18375800  | 2.20962700  |
| H | 2.45553900  | 7.17029200  | 2.60345000  |
| C | 3.98621000  | 5.81834300  | 1.94219600  |
| H | 4.79227100  | 6.51948800  | 2.12402700  |
| C | 4.27517300  | 4.55304800  | 1.43971500  |
| H | 5.30229800  | 4.27361800  | 1.23179500  |
| C | 5.27405700  | 1.85370200  | 0.11522300  |
| C | 6.24486000  | 1.59756700  | 1.08654900  |
| H | 5.95590000  | 1.46151400  | 2.12436000  |
| C | 7.58281500  | 1.50789100  | 0.72027100  |
| H | 8.33540300  | 1.31075000  | 1.47529600  |
| C | 7.95406400  | 1.67479600  | -0.61135100 |
| H | 8.99780200  | 1.60389800  | -0.89514100 |
| C | 6.98777600  | 1.93134200  | -1.57842300 |
| H | 7.27511300  | 2.05871300  | -2.61543000 |
| C | 5.64684600  | 2.01830300  | -1.21824000 |
| H | 4.89185400  | 2.20407500  | -1.97612000 |
| C | 1.26271800  | -4.28177000 | -0.47612000 |
| C | 2.58500500  | -3.80894400 | -0.48799200 |
| C | 3.59252500  | -4.48847200 | -1.16497200 |
| C | 3.28389900  | -5.74055700 | -1.69799000 |
| H | 4.06275300  | -6.29064200 | -2.21758900 |
| C | 2.01069800  | -6.28261300 | -1.59090200 |
| H | 1.80124100  | -7.26472000 | -1.99634200 |
| C | 0.98758400  | -5.53646200 | -1.01151000 |
| H | -0.02502300 | -5.92263500 | -0.99257000 |
| C | 3.35645500  | 0.90769600  | 2.05033200  |
| C | 3.62722500  | -0.45653700 | 1.88797200  |
| C | 3.57099600  | -1.33653200 | 2.96780000  |
| C | 3.23924700  | -0.81876000 | 4.21689600  |
| H | 3.20947600  | -1.49601100 | 5.06504800  |
| C | 2.95935100  | 0.52897100  | 4.39704800  |
| H | 2.71097800  | 0.90944200  | 5.38055200  |
| C | 3.01975500  | 1.39554600  | 3.31201600  |
| H | 2.82443300  | 2.45292700  | 3.44858100  |
| C | 3.90546600  | -2.78883900 | 2.75833200  |
| H | 2.98019800  | -3.35902100 | 2.63084900  |
| H | 4.41226000  | -3.18620300 | 3.64176200  |
| C | 4.94143000  | -3.83756100 | -1.35738600 |

|   |             |             |             |
|---|-------------|-------------|-------------|
| H | 5.70443400  | -4.40242800 | -0.81472200 |
| H | 5.21484500  | -3.89956900 | -2.41418400 |
| C | 4.14551100  | -2.20676500 | 0.34961600  |
| C | 4.79168300  | -2.94753400 | 1.52639000  |
| H | 4.85249900  | -4.00870600 | 1.26674700  |
| C | 6.20949800  | -2.39116100 | 1.73890200  |
| H | 6.68746100  | -2.94560200 | 2.55122100  |
| H | 6.13925300  | -1.34951500 | 2.07241500  |
| C | 7.06884300  | -2.45813600 | 0.47371500  |
| H | 8.02001600  | -1.94997300 | 0.65151500  |
| H | 7.32151500  | -3.50079400 | 0.25722100  |
| C | 6.36870300  | -1.81249300 | -0.72674400 |
| H | 6.30305300  | -0.73246700 | -0.57030500 |
| H | 6.95299900  | -1.96758100 | -1.63839800 |
| C | 4.95171300  | -2.35885300 | -0.93402600 |
| H | 4.42906800  | -1.76535200 | -1.69352300 |
| C | -3.75414500 | 0.37700700  | -1.09579700 |
| C | -2.41099400 | 1.04669200  | -0.97021800 |
| C | -4.48715400 | 1.17293300  | -2.11628400 |
| C | -3.61541700 | 2.16919800  | -2.56861600 |
| O | -1.47666500 | 0.75545000  | -0.22978900 |
| N | -2.40499300 | 2.06820500  | -1.86554100 |
| C | -5.74728900 | 1.05909000  | -2.68145700 |
| C | -3.96309700 | 3.06741200  | -3.56029500 |
| C | -6.11675800 | 1.95868100  | -3.68251200 |
| C | -5.23794500 | 2.94784500  | -4.11303200 |
| H | -5.54410600 | 3.63481300  | -4.89322900 |
| H | -3.27021000 | 3.82974800  | -3.89728800 |
| H | -7.10092500 | 1.88321600  | -4.12902200 |
| H | -6.43896800 | 0.29163400  | -2.35258400 |
| H | -1.56181900 | 2.58848500  | -2.07078200 |
| C | -0.76368800 | 4.95256000  | -0.35308700 |
| C | -1.35099000 | 4.08441800  | 0.55796100  |
| C | -0.92688200 | 6.32735000  | -0.27051300 |
| C | -2.11945000 | 4.62168000  | 1.58634900  |
| H | -1.20438700 | 3.01240200  | 0.46815600  |
| C | -1.70077000 | 6.84653600  | 0.76228700  |
| H | -0.45362100 | 6.97532900  | -0.99778000 |
| C | -2.29481000 | 5.99823300  | 1.69165400  |
| H | -2.58307800 | 3.95613900  | 2.30578100  |
| H | -1.83901000 | 7.91887100  | 0.83653900  |
| H | -2.89772100 | 6.40905300  | 2.49270000  |
| C | -4.40699800 | -0.40050200 | 0.05048400  |
| C | -3.81486900 | -1.14273700 | -1.09220700 |
| H | -2.87589700 | -1.65872400 | -0.93153500 |
| H | -4.47503600 | -1.57824300 | -1.83328800 |
| C | -5.89538700 | -0.31158300 | 0.19135000  |
| C | -6.50656800 | 0.90989100  | 0.46952200  |

|    |              |             |             |
|----|--------------|-------------|-------------|
| C  | -6.68592200  | -1.45109200 | 0.07732200  |
| C  | -7.88425000  | 0.98926000  | 0.61672600  |
| H  | -5.89909500  | 1.80856600  | 0.53293400  |
| C  | -8.06592900  | -1.36765400 | 0.22543000  |
| H  | -6.21043700  | -2.40510700 | -0.13068800 |
| C  | -8.68613000  | -0.14760200 | 0.49384400  |
| H  | -8.67322900  | -2.26335100 | 0.13308300  |
| C  | -3.68202700  | -0.48188800 | 1.37332300  |
| H  | -2.60379100  | -0.55802300 | 1.24447900  |
| H  | -3.92589000  | 0.37417300  | 2.00817300  |
| F  | -4.11808100  | -1.62439700 | 2.03536900  |
| H  | -8.35042400  | 1.94980200  | 0.81548000  |
| Cl | 0.23717100   | 4.29423400  | -1.63343600 |
| C  | -10.17442800 | -0.06678200 | 0.71379200  |
| C  | -10.53403800 | -0.20832500 | 2.19787700  |
| H  | -10.67828600 | -0.85277900 | 0.14245000  |
| H  | -10.55438800 | 0.88882400  | 0.33828600  |
| C  | -12.03678200 | -0.13646500 | 2.45524600  |
| H  | -10.13897100 | -1.15976000 | 2.57301900  |
| H  | -10.02332400 | 0.57778900  | 2.76644700  |
| C  | -12.37711700 | -0.27164900 | 3.93631700  |
| H  | -12.42601400 | 0.81290600  | 2.07122100  |
| H  | -12.54038700 | -0.92614500 | 1.88688600  |
| H  | -13.45365700 | -0.22039200 | 4.10789300  |
| H  | -12.02148800 | -1.22547400 | 4.33448800  |
| H  | -11.90858500 | 0.52507500  | 4.51979000  |

### (16) IM<sub>21</sub>-PhF

|                                               |            |             |                             |
|-----------------------------------------------|------------|-------------|-----------------------------|
| Zero-point correction =                       |            |             | 1.192228 (Hartree/Particle) |
| Thermal correction to Energy =                |            |             | 1.268522                    |
| Thermal correction to Enthalpy =              |            |             | 1.269466                    |
| Thermal correction to Gibbs Free Energy =     |            |             | 1.068932                    |
| Sum of electronic and zero-point Energies =   |            |             | -4636.516686                |
| Sum of electronic and thermal Energies =      |            |             | -4636.440392                |
| Sum of electronic and thermal Enthalpies =    |            |             | -4636.439447                |
| Sum of electronic and thermal Free Energies = |            |             | -4636.639982                |
| Au                                            | 0.32127900 | -1.80168700 | -0.38832500                 |
| Au                                            | 1.67607500 | 1.27811200  | -1.70842300                 |
| P                                             | 2.22571500 | -2.97388200 | 0.49894900                  |
| P                                             | 1.65777300 | 3.10957900  | -0.32289200                 |
| Cl                                            | 1.83248400 | -0.76181100 | -2.98227000                 |
| O                                             | 3.69031400 | 1.53311900  | 0.72363500                  |
| O                                             | 3.99370000 | -0.69001600 | 0.58954900                  |
| C                                             | 2.45210400 | -2.85418600 | 2.30278100                  |
| C                                             | 3.56949100 | -3.42941900 | 2.91658400                  |
| H                                             | 4.32644000 | -3.92142400 | 2.31329700                  |
| C                                             | 3.71086700 | -3.36819900 | 4.29719200                  |
| H                                             | 4.57628500 | -3.81689400 | 4.77106300                  |

|   |             |             |             |
|---|-------------|-------------|-------------|
| C | 2.74101000  | -2.73171900 | 5.06968700  |
| H | 2.85215200  | -2.68761800 | 6.14727200  |
| C | 1.63206700  | -2.15581200 | 4.46033200  |
| H | 0.87591400  | -1.65975000 | 5.05809200  |
| C | 1.48667900  | -2.21217400 | 3.07648700  |
| H | 0.62639200  | -1.74978800 | 2.60093100  |
| C | 1.71776300  | -4.70607400 | 0.18662000  |
| C | 1.67184700  | -5.67864000 | 1.18291500  |
| H | 1.94051000  | -5.43278500 | 2.20411300  |
| C | 1.26598100  | -6.97405100 | 0.87029100  |
| H | 1.22552100  | -7.72530200 | 1.65058000  |
| C | 0.91444400  | -7.30329100 | -0.43207500 |
| H | 0.60323700  | -8.31361700 | -0.67127300 |
| C | 0.95832400  | -6.33309300 | -1.43089400 |
| H | 0.68465700  | -6.58576800 | -2.44887700 |
| C | 1.34867100  | -5.03769000 | -1.12287200 |
| H | 1.38383700  | -4.28200500 | -1.90447200 |
| C | 0.25703100  | 4.25619500  | -0.44914100 |
| C | -0.68287100 | 4.09961100  | -1.46548100 |
| H | -0.56479400 | 3.30492000  | -2.19430600 |
| C | -1.77334400 | 4.95847600  | -1.54316400 |
| H | -2.51107400 | 4.82125100  | -2.32512100 |
| C | -1.91618800 | 5.98277500  | -0.61665600 |
| H | -2.76912500 | 6.64907200  | -0.67322200 |
| C | -0.96253500 | 6.16156100  | 0.38268700  |
| H | -1.06829400 | 6.96887100  | 1.09773500  |
| C | 0.12368800  | 5.30380900  | 0.46683600  |
| H | 0.86588000  | 5.44819000  | 1.24566800  |
| C | 3.15081700  | 4.15215800  | -0.44556400 |
| C | 3.67752600  | 4.78338800  | 0.68247100  |
| H | 3.22871200  | 4.62552200  | 1.65874600  |
| C | 4.79595500  | 5.59987500  | 0.56014500  |
| H | 5.20425000  | 6.08778700  | 1.43789000  |
| C | 5.39176100  | 5.78671200  | -0.68418600 |
| H | 6.26403500  | 6.42358200  | -0.77598700 |
| C | 4.87083500  | 5.15323300  | -1.80742300 |
| H | 5.33600700  | 5.29204100  | -2.77649800 |
| C | 3.75274500  | 4.33400400  | -1.69020500 |
| H | 3.35320900  | 3.83206500  | -2.56630200 |
| C | 3.91408000  | -2.90224100 | -0.18431000 |
| C | 4.63697500  | -1.70904900 | -0.04854500 |
| C | 5.94015300  | -1.60115100 | -0.53252200 |
| C | 6.50993200  | -2.70974900 | -1.15397600 |
| H | 7.52042400  | -2.62367200 | -1.54162400 |
| C | 5.81530200  | -3.90137700 | -1.28901600 |
| H | 6.27642300  | -4.75339900 | -1.77291000 |
| C | 4.51625300  | -3.99602500 | -0.80356900 |
| H | 3.97295400  | -4.92734600 | -0.90593600 |



|   |             |             |             |
|---|-------------|-------------|-------------|
| C | 1.66587000  | 2.47689000  | 1.38591400  |
| C | 2.76105300  | 1.66689300  | 1.71217900  |
| C | 2.90630200  | 1.08800300  | 2.96778200  |
| C | 1.89587000  | 1.31829900  | 3.90050400  |
| H | 1.99677900  | 0.88235500  | 4.89003200  |
| C | 0.78263000  | 2.08991200  | 3.59101600  |
| H | 0.00797400  | 2.24888200  | 4.33159100  |
| C | 0.66480700  | 2.67705600  | 2.33306800  |
| H | -0.20819900 | 3.27131300  | 2.08971700  |
| C | 4.12524800  | 0.25171100  | 3.26101200  |
| H | 3.85108800  | -0.80407600 | 3.21812200  |
| H | 4.47389800  | 0.44922500  | 4.27886100  |
| C | 6.68046200  | -0.29895100 | -0.39601800 |
| H | 7.36894400  | -0.34726200 | 0.45398000  |
| H | 7.29686600  | -0.13145100 | -1.28290200 |
| C | 4.67965700  | 0.53962200  | 0.84173300  |
| C | 5.25151000  | 0.54049300  | 2.26340100  |
| H | 5.99103600  | -0.26577000 | 2.32370700  |
| C | 5.93741900  | 1.88761700  | 2.53270200  |
| H | 6.38975700  | 1.85947500  | 3.52792400  |
| H | 5.17660900  | 2.67746500  | 2.55658000  |
| C | 6.98917000  | 2.23149000  | 1.47716200  |
| H | 7.39535900  | 3.22733600  | 1.67216100  |
| H | 7.83274700  | 1.53804500  | 1.56003100  |
| C | 6.39579900  | 2.19418300  | 0.06672300  |
| H | 5.66651300  | 3.00046900  | -0.03856200 |
| H | 7.17351200  | 2.37197800  | -0.68183300 |
| C | 5.70348800  | 0.86268800  | -0.24246400 |
| H | 5.13057400  | 0.95329300  | -1.17383400 |
| C | -1.60210300 | -1.65033000 | -1.00277400 |
| C | -2.81820300 | -1.49255300 | -0.06840500 |
| C | -2.16054100 | -1.95951800 | -2.23283700 |
| C | -3.59782600 | -1.94624800 | -2.13235700 |
| O | -2.81452800 | -1.27814600 | 1.10885700  |
| N | -3.96120800 | -1.68886200 | -0.84970900 |
| C | -1.53850500 | -2.17891600 | -3.49186100 |
| C | -4.40070200 | -2.14716100 | -3.24987400 |
| C | -2.33542000 | -2.37767900 | -4.58855800 |
| C | -3.74669600 | -2.36182000 | -4.45375100 |
| H | -4.34771900 | -2.52224800 | -5.34309100 |
| H | -5.48096000 | -2.13528000 | -3.17793400 |
| H | -1.89957000 | -2.53816100 | -5.56614500 |
| H | -0.45535300 | -2.14863700 | -3.55727800 |
| H | -4.90855400 | -1.52169200 | -0.53417500 |
| C | -2.84879800 | 1.42797800  | -0.67528400 |
| C | -4.29370200 | 1.43679800  | -0.35414700 |
| C | -4.72596900 | 1.33914400  | 0.97441000  |
| C | -5.26854000 | 1.48539800  | -1.35810500 |

|   |              |             |             |
|---|--------------|-------------|-------------|
| C | -6.07793700  | 1.26388400  | 1.27747100  |
| H | -4.00660200  | 1.32390200  | 1.78355900  |
| C | -6.61887200  | 1.41012300  | -1.04638900 |
| H | -4.97189600  | 1.60694400  | -2.39453100 |
| C | -7.04919100  | 1.29120000  | 0.27655200  |
| H | -7.35524100  | 1.45525800  | -1.84326900 |
| H | -6.38994300  | 1.17693700  | 2.31446900  |
| C | -2.35834500  | 1.08560700  | -1.87352100 |
| H | -2.99261900  | 0.77118000  | -2.69595600 |
| H | -1.29054100  | 1.08777100  | -2.07152600 |
| C | -8.99476300  | -2.15608800 | 0.15436900  |
| C | -7.63737700  | -1.99139000 | 0.34401500  |
| C | -7.05155000  | -1.91732900 | 1.59361900  |
| C | -7.87894700  | -2.00658000 | 2.70833600  |
| C | -9.25325100  | -2.16734300 | 2.55463200  |
| C | -9.80705400  | -2.24560600 | 1.28062900  |
| H | -9.39585300  | -2.20869700 | -0.85040400 |
| H | -5.97978400  | -1.78067400 | 1.69237500  |
| H | -7.44458200  | -1.94917400 | 3.69946700  |
| H | -9.89118300  | -2.23483500 | 3.42753300  |
| H | -10.87584500 | -2.37470500 | 1.15783200  |
| F | -6.84062700  | -1.87925000 | -0.75381100 |
| C | -1.88119800  | 1.72150100  | 0.43645500  |
| H | -1.92395500  | 0.95910700  | 1.21949800  |
| H | -0.86117100  | 1.76058300  | 0.05106600  |
| F | -2.17624700  | 2.94376700  | 1.02604400  |
| C | -8.51163100  | 1.25824600  | 0.63242300  |
| C | -9.02348700  | 2.62391900  | 1.10647200  |
| H | -8.67984100  | 0.51899700  | 1.42376700  |
| H | -9.09689600  | 0.92942000  | -0.23249300 |
| C | -10.50161200 | 2.59094400  | 1.48567100  |
| H | -8.42904600  | 2.95095400  | 1.96760900  |
| H | -8.85692200  | 3.36856300  | 0.31976200  |
| C | -11.00239400 | 3.94021700  | 1.99244000  |
| H | -11.09134600 | 2.28016600  | 0.61621800  |
| H | -10.65919200 | 1.82435900  | 2.25281400  |
| H | -12.06081200 | 3.90312000  | 2.25611400  |
| H | -10.44889300 | 4.25423300  | 2.88102800  |
| H | -10.87595700 | 4.71594400  | 1.23304000  |

**(17) TS<sub>2-31</sub>-PhF**

|                                             |                             |
|---------------------------------------------|-----------------------------|
| Zero-point correction =                     | 1.191921 (Hartree/Particle) |
| Thermal correction to Energy =              | 1.267227                    |
| Thermal correction to Enthalpy =            | 1.268171                    |
| Thermal correction to Gibbs Free Energy =   | 1.071461                    |
| Sum of electronic and zero-point Energies = | -4636.514193                |
| Sum of electronic and thermal Energies =    | -4636.438887                |
| Sum of electronic and thermal Enthalpies =  | -4636.437943                |

|                                               |             |             |              |
|-----------------------------------------------|-------------|-------------|--------------|
| Sum of electronic and thermal Free Energies = |             |             | -4636.634654 |
| Au                                            | 0.12193700  | -1.69413500 | -0.33869000  |
| Au                                            | 1.74070700  | 1.29771400  | -1.63502300  |
| P                                             | 1.96281800  | -2.95650900 | 0.54096600   |
| P                                             | 1.75154500  | 3.10634200  | -0.21970100  |
| Cl                                            | 1.87694300  | -0.72757200 | -2.92034500  |
| O                                             | 3.77561400  | 1.43408600  | 0.63798700   |
| O                                             | 3.90080000  | -0.80259000 | 0.47305800   |
| C                                             | 2.32211600  | -2.81634500 | 2.31999900   |
| C                                             | 3.42872900  | -3.47158900 | 2.87032500   |
| H                                             | 4.10430800  | -4.02750400 | 2.22708800   |
| C                                             | 3.66118200  | -3.41012700 | 4.23820400   |
| H                                             | 4.51752300  | -3.92012600 | 4.66419100   |
| C                                             | 2.79396400  | -2.69307700 | 5.06095100   |
| H                                             | 2.97474700  | -2.65016500 | 6.12903900   |
| C                                             | 1.69789100  | -2.03604700 | 4.51408900   |
| H                                             | 1.02247400  | -1.47673800 | 5.15147800   |
| C                                             | 1.46119200  | -2.09343200 | 3.14303100   |
| H                                             | 0.60837200  | -1.57431600 | 2.71484000   |
| C                                             | 1.32053900  | -4.65839000 | 0.31757800   |
| C                                             | 1.27909200  | -5.59803900 | 1.34529900   |
| H                                             | 1.63162100  | -5.34332500 | 2.33812300   |
| C                                             | 0.76931400  | -6.87147600 | 1.10250700   |
| H                                             | 0.73376800  | -7.59585200 | 1.90796500   |
| C                                             | 0.30874100  | -7.21286900 | -0.16206600  |
| H                                             | -0.08484200 | -8.20589100 | -0.34618000  |
| C                                             | 0.34677100  | -6.27580200 | -1.19216600  |
| H                                             | -0.01351100 | -6.53640100 | -2.18057700  |
| C                                             | 0.84080000  | -5.00151200 | -0.95267500  |
| H                                             | 0.86939300  | -4.27256400 | -1.75938500  |
| C                                             | 0.32434600  | 4.22381400  | -0.26484700  |
| C                                             | -0.67937600 | 4.01673000  | -1.20888400  |
| H                                             | -0.57956600 | 3.21665000  | -1.93439600  |
| C                                             | -1.80130600 | 4.83802400  | -1.22572900  |
| H                                             | -2.58416800 | 4.66701500  | -1.95576000  |
| C                                             | -1.91316800 | 5.87464100  | -0.30823200  |
| H                                             | -2.78893800 | 6.51320900  | -0.31726800  |
| C                                             | -0.89689600 | 6.10535900  | 0.61632000   |
| H                                             | -0.97809700 | 6.92571900  | 1.31969700   |
| C                                             | 0.22232800  | 5.28584000  | 0.63834700   |
| H                                             | 1.01599800  | 5.47233100  | 1.35555700   |
| C                                             | 3.23982500  | 4.14667600  | -0.40556400  |
| C                                             | 3.88733200  | 4.68682500  | 0.70637100   |
| H                                             | 3.51696500  | 4.48611500  | 1.70712100   |
| C                                             | 5.02571500  | 5.46631000  | 0.53314000   |
| H                                             | 5.52859900  | 5.88312200  | 1.39833500   |
| C                                             | 5.51803300  | 5.70912500  | -0.74565300  |
| H                                             | 6.40731600  | 6.31467800  | -0.87752800  |

|   |             |             |             |
|---|-------------|-------------|-------------|
| C | 4.87241200  | 5.17160900  | -1.85451200 |
| H | 5.25752300  | 5.35446100  | -2.85087600 |
| C | 3.73640000  | 4.38783500  | -1.68664700 |
| H | 3.24385200  | 3.95402500  | -2.55171800 |
| C | 3.59860200  | -3.01098600 | -0.26320600 |
| C | 4.40900100  | -1.86718100 | -0.21309100 |
| C | 5.65933900  | -1.84774700 | -0.82817900 |
| C | 6.09394900  | -2.99824400 | -1.48241300 |
| H | 7.06349600  | -2.98089100 | -1.97080200 |
| C | 5.31730100  | -4.14515100 | -1.52463000 |
| H | 5.67424800  | -5.03173700 | -2.03383300 |
| C | 4.06748700  | -4.14827800 | -0.91705000 |
| H | 3.45782400  | -5.04259500 | -0.95216700 |
| C | 1.85889900  | 2.45357400  | 1.47748700  |
| C | 2.94626000  | 1.60072200  | 1.70624900  |
| C | 3.18430600  | 1.01367400  | 2.94275500  |
| C | 2.27744200  | 1.29002100  | 3.96559100  |
| H | 2.44969700  | 0.84969900  | 4.94323000  |
| C | 1.17289800  | 2.10661700  | 3.75730000  |
| H | 0.47846600  | 2.29898400  | 4.56632000  |
| C | 0.95940800  | 2.69501800  | 2.51214800  |
| H | 0.09086400  | 3.32075400  | 2.34680800  |
| C | 4.37846600  | 0.10936500  | 3.11394000  |
| H | 4.03654300  | -0.92767100 | 3.10317000  |
| H | 4.84056000  | 0.28302400  | 4.09008900  |
| C | 6.49015800  | -0.59258600 | -0.79829300 |
| H | 7.27604800  | -0.68258200 | -0.04111600 |
| H | 6.99900600  | -0.46887000 | -1.75751900 |
| C | 4.69704000  | 0.37062400  | 0.64968600  |
| C | 5.41276300  | 0.32799100  | 2.00392100  |
| H | 6.10169900  | -0.52365900 | 1.99095200  |
| C | 6.20791700  | 1.62840600  | 2.19211400  |
| H | 6.76152000  | 1.57101500  | 3.13334600  |
| H | 5.50433400  | 2.46426200  | 2.29178700  |
| C | 7.15968600  | 1.90567900  | 1.02753000  |
| H | 7.65108400  | 2.87057000  | 1.17574400  |
| H | 7.95754900  | 1.15541800  | 1.01926700  |
| C | 6.41682700  | 1.91513900  | -0.31135200 |
| H | 5.73123800  | 2.76670600  | -0.33674100 |
| H | 7.12016200  | 2.04933400  | -1.13824700 |
| C | 5.61407100  | 0.62941800  | -0.54068400 |
| H | 4.94618200  | 0.75751500  | -1.40241700 |
| C | -1.77118200 | -1.43147200 | -1.06952500 |
| C | -3.03919800 | -1.47744100 | -0.19304400 |
| C | -2.22558100 | -1.86861900 | -2.34415200 |
| C | -3.63598500 | -2.05263400 | -2.30496700 |
| O | -3.11539400 | -1.31174000 | 0.99697900  |
| N | -4.09330900 | -1.78636800 | -1.03245100 |

|   |              |             |             |
|---|--------------|-------------|-------------|
| C | -1.51786300  | -2.08233100 | -3.53963600 |
| C | -4.34573300  | -2.44534300 | -3.42750400 |
| C | -2.22201900  | -2.47727700 | -4.66092100 |
| C | -3.61482000  | -2.65193100 | -4.59542000 |
| H | -4.14527300  | -2.96023300 | -5.48994400 |
| H | -5.41877100  | -2.59049600 | -3.39730100 |
| H | -1.70663100  | -2.64930200 | -5.59716600 |
| H | -0.44547300  | -1.91289800 | -3.56425100 |
| H | -5.06077500  | -1.82717500 | -0.73856000 |
| C | -2.58852300  | 1.29391200  | -0.51364600 |
| C | -4.02555400  | 1.43893600  | -0.28024700 |
| C | -4.53116500  | 1.46594200  | 1.02999200  |
| C | -4.94596500  | 1.46013500  | -1.34272900 |
| C | -5.89694300  | 1.46884300  | 1.26047900  |
| H | -3.85526000  | 1.47281000  | 1.87453000  |
| C | -6.30791900  | 1.45517000  | -1.10117400 |
| H | -4.59485300  | 1.48069200  | -2.36825900 |
| C | -6.80912900  | 1.44238000  | 0.20526500  |
| H | -7.00138200  | 1.45770900  | -1.93639100 |
| H | -6.26882500  | 1.46406900  | 2.28051000  |
| C | -2.06023300  | 0.85720100  | -1.68819600 |
| H | -2.68062800  | 0.65767500  | -2.55213300 |
| H | -0.99095300  | 0.86679600  | -1.86545500 |
| C | -8.98917700  | -1.98024700 | 0.59952500  |
| C | -7.61451000  | -1.85050900 | 0.56036000  |
| C | -6.84012900  | -1.63907000 | 1.68500400  |
| C | -7.49017800  | -1.54389400 | 2.91196600  |
| C | -8.87496800  | -1.66127700 | 2.98894200  |
| C | -9.62087800  | -1.88309700 | 1.83496200  |
| H | -9.53906100  | -2.15047700 | -0.31799600 |
| H | -5.76174000  | -1.53982100 | 1.60581000  |
| H | -6.90721600  | -1.37887400 | 3.81058200  |
| H | -9.37193200  | -1.58703600 | 3.94871600  |
| H | -10.69837100 | -1.98193100 | 1.89238700  |
| F | -6.99651700  | -1.92123200 | -0.65057400 |
| C | -1.65116500  | 1.46323300  | 0.65193600  |
| H | -1.78579200  | 0.64001100  | 1.36215300  |
| H | -0.61245700  | 1.47070800  | 0.31632200  |
| F | -1.90435800  | 2.65320500  | 1.31575700  |
| C | -8.28834900  | 1.45424900  | 0.47158400  |
| C | -8.83180600  | 2.88119400  | 0.62323700  |
| H | -8.50138500  | 0.88305700  | 1.38216000  |
| H | -8.81410100  | 0.95027200  | -0.34598400 |
| C | -10.33414700 | 2.90619600  | 0.89196400  |
| H | -8.30109500  | 3.38494000  | 1.43942100  |
| H | -8.60786300  | 3.45233000  | -0.28528400 |
| C | -10.87210100 | 4.32590200  | 1.04220400  |
| H | -10.85590600 | 2.39718600  | 0.07410500  |

|   |              |            |            |
|---|--------------|------------|------------|
| H | -10.54893000 | 2.32937400 | 1.79836500 |
| H | -11.94662800 | 4.32991900 | 1.23206500 |
| H | -10.38544200 | 4.84388200 | 1.87246900 |
| H | -10.69196200 | 4.91046900 | 0.13648700 |

**(18) IM<sub>31</sub>-PhF**

|                                               |             |             |                             |
|-----------------------------------------------|-------------|-------------|-----------------------------|
| Zero-point correction =                       |             |             | 1.193177 (Hartree/Particle) |
| Thermal correction to Energy =                |             |             | 1.268276                    |
| Thermal correction to Enthalpy =              |             |             | 1.269221                    |
| Thermal correction to Gibbs Free Energy =     |             |             | 1.073724                    |
| Sum of electronic and zero-point Energies =   |             |             | -4636.561168                |
| Sum of electronic and thermal Energies =      |             |             | -4636.486069                |
| Sum of electronic and thermal Enthalpies =    |             |             | -4636.485125                |
| Sum of electronic and thermal Free Energies = |             |             | -4636.680621                |
| Au                                            | 1.26460900  | 0.09538900  | -2.06901400                 |
| Au                                            | -1.59613600 | 1.65381600  | -1.48059800                 |
| P                                             | 3.27095700  | -0.19275400 | -1.00307300                 |
| P                                             | -2.42256900 | 2.25523200  | 0.55383800                  |
| Cl                                            | -0.57771100 | 0.90394000  | -3.58060800                 |
| O                                             | 0.35730200  | 2.93241600  | 0.86394600                  |
| O                                             | 2.34608100  | 2.27281800  | 0.04916800                  |
| C                                             | 3.38682000  | -0.57536200 | 0.76244400                  |
| C                                             | 4.61062800  | -0.37951600 | 1.41309700                  |
| H                                             | 5.45426900  | 0.04270400  | 0.87539700                  |
| C                                             | 4.73689400  | -0.72358400 | 2.75168200                  |
| H                                             | 5.68327900  | -0.57771500 | 3.25986300                  |
| C                                             | 3.65281100  | -1.26982000 | 3.43774800                  |
| H                                             | 3.76534800  | -1.56285300 | 4.47539000                  |
| C                                             | 2.44223400  | -1.47282400 | 2.78723100                  |
| H                                             | 1.60538200  | -1.92863500 | 3.30337000                  |
| C                                             | 2.30539600  | -1.11237800 | 1.44926200                  |
| H                                             | 1.35847300  | -1.24183100 | 0.93736800                  |
| C                                             | 4.23781600  | -1.48092100 | -1.85198400                 |
| C                                             | 4.75086000  | -2.57431600 | -1.15450200                 |
| H                                             | 4.63475200  | -2.64959800 | -0.08006600                 |
| C                                             | 5.39310500  | -3.59749400 | -1.84710400                 |
| H                                             | 5.77974400  | -4.44985600 | -1.29966900                 |
| C                                             | 5.53150200  | -3.52809600 | -3.22806900                 |
| H                                             | 6.03711700  | -4.32377900 | -3.76341700                 |
| C                                             | 5.01373400  | -2.43894400 | -3.92683000                 |
| H                                             | 5.11326800  | -2.38601700 | -5.00491100                 |
| C                                             | 4.35758400  | -1.42382100 | -3.24449300                 |
| H                                             | 3.92632100  | -0.59199600 | -3.79519500                 |
| C                                             | -4.05815900 | 1.55769600  | 0.90753300                  |
| C                                             | -4.43852800 | 0.37282600  | 0.27535400                  |
| H                                             | -3.80136400 | -0.07682900 | -0.48040500                 |
| C                                             | -5.64408500 | -0.23687600 | 0.60121300                  |
| H                                             | -5.92930500 | -1.16031100 | 0.10925000                  |

|   |             |             |             |
|---|-------------|-------------|-------------|
| C | -6.47402400 | 0.34217000  | 1.55373200  |
| H | -7.41535200 | -0.13234000 | 1.80679700  |
| C | -6.10403200 | 1.53001300  | 2.17875500  |
| H | -6.75754500 | 1.98342000  | 2.91481900  |
| C | -4.89697500 | 2.13996800  | 1.86161800  |
| H | -4.61439800 | 3.06654500  | 2.34993800  |
| C | -2.50288800 | 4.05222600  | 0.82506700  |
| C | -2.31379900 | 4.58315300  | 2.10366900  |
| H | -2.10588400 | 3.92653000  | 2.94322500  |
| C | -2.37920500 | 5.95848300  | 2.29789200  |
| H | -2.23349700 | 6.36940700  | 3.29051200  |
| C | -2.63078300 | 6.80405100  | 1.22114400  |
| H | -2.67903700 | 7.87591700  | 1.37475300  |
| C | -2.81969700 | 6.27583900  | -0.05211800 |
| H | -3.01490500 | 6.93337600  | -0.89107900 |
| C | -2.75429700 | 4.90137100  | -0.25260500 |
| H | -2.89276200 | 4.49095800  | -1.24827700 |
| C | 4.13104500  | 1.39536900  | -1.20141500 |
| C | 3.47086900  | 2.52207100  | -0.68029800 |
| C | 3.93295400  | 3.80770100  | -0.94347100 |
| C | 5.11822300  | 3.94316400  | -1.66683400 |
| H | 5.48905000  | 4.94293500  | -1.87144400 |
| C | 5.81718100  | 2.84006500  | -2.13453300 |
| H | 6.73985100  | 2.97202500  | -2.68580700 |
| C | 5.31082800  | 1.56155900  | -1.91882700 |
| H | 5.82767900  | 0.69472500  | -2.31607200 |
| C | -1.32991700 | 1.63691900  | 1.86211200  |
| C | 0.00574900  | 2.06820300  | 1.86723400  |
| C | 0.87708100  | 1.68607000  | 2.88280300  |
| C | 0.39098900  | 0.83825900  | 3.87846100  |
| H | 1.06404200  | 0.54886700  | 4.67999600  |
| C | -0.91460500 | 0.36846400  | 3.86638400  |
| H | -1.27697400 | -0.29792900 | 4.63972800  |
| C | -1.78295400 | 0.77553900  | 2.85716800  |
| H | -2.80374800 | 0.41075000  | 2.84745500  |
| C | 2.27938400  | 2.23255700  | 2.89331400  |
| H | 2.96171100  | 1.50298800  | 2.44774800  |
| H | 2.60731000  | 2.39084000  | 3.92433600  |
| C | 3.13218200  | 4.99767200  | -0.48230400 |
| H | 3.63930200  | 5.47868100  | 0.35938000  |
| H | 3.09911800  | 5.74191600  | -1.28231000 |
| C | 1.70074500  | 3.34839200  | 0.74024500  |
| C | 2.33458500  | 3.55133200  | 2.11969300  |
| H | 3.38255500  | 3.82917500  | 1.96428700  |
| C | 1.60191700  | 4.68935900  | 2.84920200  |
| H | 2.09440300  | 4.86570500  | 3.80939200  |
| H | 0.57960600  | 4.36675200  | 3.07901500  |
| C | 1.54744000  | 5.98240300  | 2.03332800  |

|   |             |             |             |
|---|-------------|-------------|-------------|
| H | 0.93207600  | 6.71879000  | 2.55658400  |
| H | 2.54884700  | 6.41915400  | 1.96785100  |
| C | 0.96973300  | 5.74485700  | 0.63488700  |
| H | -0.08850200 | 5.48641100  | 0.71904200  |
| H | 1.02420200  | 6.66030600  | 0.03846600  |
| C | 1.69510900  | 4.61695700  | -0.10783700 |
| H | 1.14692300  | 4.36411300  | -1.02339000 |
| C | -0.41877700 | -2.80059300 | -0.07532900 |
| C | 0.49165000  | -3.62046400 | 0.73667200  |
| C | -0.01405300 | -2.92864200 | -1.41244900 |
| C | 1.15127500  | -3.75920200 | -1.43458800 |
| O | 0.48533300  | -3.77389300 | 1.94809300  |
| N | 1.41631900  | -4.16940500 | -0.14629600 |
| C | -0.49996900 | -2.38959600 | -2.62216400 |
| C | 1.83457300  | -4.01746100 | -2.61163900 |
| C | 0.18178100  | -2.65249900 | -3.79456600 |
| C | 1.33942600  | -3.45208100 | -3.78420600 |
| H | 1.85967900  | -3.64035000 | -4.71639000 |
| H | 2.72783000  | -4.63099500 | -2.62141200 |
| H | -0.17523500 | -2.23545600 | -4.72853600 |
| H | -1.38785300 | -1.76569700 | -2.63247200 |
| H | 2.22417600  | -4.69131200 | 0.16043000  |
| C | -2.45237700 | -2.48532900 | 1.42201300  |
| C | -3.67498500 | -2.98493500 | 0.87422100  |
| C | -4.74204100 | -3.38407200 | 1.71448600  |
| C | -3.87955400 | -3.08905200 | -0.52107900 |
| C | -5.93263100 | -3.84217600 | 1.18333400  |
| H | -4.63900700 | -3.29446300 | 2.78918300  |
| C | -5.07851200 | -3.54986700 | -1.03771100 |
| H | -3.07619700 | -2.84133800 | -1.20655800 |
| C | -6.13125100 | -3.93121300 | -0.19968200 |
| H | -5.20174600 | -3.62894900 | -2.11393000 |
| H | -6.73606800 | -4.13657500 | 1.85240300  |
| C | -1.40639500 | -1.85815900 | 0.53721600  |
| H | -1.87444700 | -1.27298200 | -0.26216600 |
| H | -0.84310400 | -1.13571800 | 1.14646400  |
| C | 3.28456600  | -4.67275800 | 3.44415500  |
| C | 4.29691800  | -4.46812200 | 2.52659500  |
| C | 5.58386500  | -4.11518700 | 2.88210400  |
| C | 5.87392400  | -3.97109200 | 4.23557600  |
| C | 4.88363300  | -4.18091100 | 5.19084100  |
| C | 3.59522400  | -4.52892300 | 4.79294400  |
| H | 2.28210300  | -4.90541500 | 3.10419600  |
| H | 6.33538800  | -3.96659500 | 2.11533900  |
| H | 6.87920300  | -3.70510600 | 4.54099600  |
| H | 5.11722900  | -4.08067900 | 6.24416200  |
| H | 2.82273600  | -4.69188900 | 5.53568000  |
| F | 4.01469000  | -4.60755800 | 1.20266400  |



|   |              |             |             |
|---|--------------|-------------|-------------|
| C | -2.17083900  | -2.61395500 | 2.88240700  |
| H | -2.31024000  | -3.63983800 | 3.23216800  |
| H | -1.15864100  | -2.29368800 | 3.12049400  |
| F | -3.04899500  | -1.81807200 | 3.64510700  |
| C | -7.45955900  | -4.36054200 | -0.75892700 |
| C | -8.43268700  | -3.17989600 | -0.88401700 |
| H | -7.90274500  | -5.12484800 | -0.11258000 |
| H | -7.32024300  | -4.81999400 | -1.74240900 |
| C | -9.79919300  | -3.59612100 | -1.42118300 |
| H | -8.55235100  | -2.70752400 | 0.09912100  |
| H | -7.99297600  | -2.41841800 | -1.53990100 |
| C | -10.75981300 | -2.41749400 | -1.54632900 |
| H | -9.67244300  | -4.07585200 | -2.39761500 |
| H | -10.22956300 | -4.35578400 | -0.75982900 |
| H | -11.73331200 | -2.73321700 | -1.92502200 |
| H | -10.92044200 | -1.93759500 | -0.57731200 |
| H | -10.36631100 | -1.66109000 | -2.23016500 |

**(19) IM<sub>41</sub>-PhF**

|                                               |             |             |                             |
|-----------------------------------------------|-------------|-------------|-----------------------------|
| Zero-point correction =                       |             |             | 1.196334 (Hartree/Particle) |
| Thermal correction to Energy =                |             |             | 1.270349                    |
| Thermal correction to Enthalpy =              |             |             | 1.271294                    |
| Thermal correction to Gibbs Free Energy =     |             |             | 1.080338                    |
| Sum of electronic and zero-point Energies =   |             |             | -4636.613620                |
| Sum of electronic and thermal Energies =      |             |             | -4636.539605                |
| Sum of electronic and thermal Enthalpies =    |             |             | -4636.538661                |
| Sum of electronic and thermal Free Energies = |             |             | -4636.729616                |
| Au                                            | 0.29972200  | -0.65018700 | -2.01171400                 |
| Au                                            | -1.98138000 | 1.62824100  | -0.87397500                 |
| P                                             | 2.55752100  | -0.97087100 | -1.83435700                 |
| P                                             | -1.81581700 | 3.02594800  | 0.91709900                  |
| Cl                                            | -2.06578800 | -0.13275500 | -2.59581600                 |
| O                                             | 0.91674300  | 3.05562500  | 0.05072500                  |
| O                                             | 2.31682100  | 1.83488900  | -1.21512000                 |
| C                                             | 3.29049000  | -1.00813800 | -0.17858200                 |
| C                                             | 4.68084100  | -0.92450800 | -0.03994200                 |
| H                                             | 5.31142100  | -0.81917900 | -0.91860800                 |
| C                                             | 5.25002600  | -0.95397300 | 1.22601300                  |
| H                                             | 6.32669000  | -0.89120000 | 1.33602700                  |
| C                                             | 4.43710500  | -1.07211100 | 2.35372800                  |
| H                                             | 4.88790500  | -1.09916800 | 3.34285700                  |
| C                                             | 3.05552800  | -1.14384900 | 2.21584800                  |
| H                                             | 2.42372600  | -1.22611100 | 3.09047500                  |
| C                                             | 2.47964700  | -1.10571900 | 0.94856800                  |
| H                                             | 1.39974800  | -1.13160400 | 0.83362200                  |
| C                                             | 3.04512200  | -2.49612400 | -2.70056700                 |
| C                                             | 3.94449800  | -3.41408400 | -2.16193400                 |
| H                                             | 4.39052700  | -3.23954400 | -1.18620800                 |

|   |             |             |             |
|---|-------------|-------------|-------------|
| C | 4.26463200  | -4.56617600 | -2.86975900 |
| H | 4.96259400  | -5.27991800 | -2.44723100 |
| C | 3.68472300  | -4.81122100 | -4.11206400 |
| H | 3.94017300  | -5.71176200 | -4.66081300 |
| C | 2.78120700  | -3.89710400 | -4.64995900 |
| H | 2.32411400  | -4.08362300 | -5.61479900 |
| C | 2.45537500  | -2.74800400 | -3.94320900 |
| H | 1.73684100  | -2.04572100 | -4.35720000 |
| C | -3.28003600 | 2.92318800  | 1.99360600  |
| C | -3.71008000 | 1.65930000  | 2.40170300  |
| H | -3.17138500 | 0.76292600  | 2.11212700  |
| C | -4.82900800 | 1.53803900  | 3.21270200  |
| H | -5.13982500 | 0.54863600  | 3.53410700  |
| C | -5.52728500 | 2.67795400  | 3.60550600  |
| H | -6.40701500 | 2.58025700  | 4.23182200  |
| C | -5.10574700 | 3.93409300  | 3.19690700  |
| H | -5.65067700 | 4.81969500  | 3.49828200  |
| C | -3.97723500 | 4.06392200  | 2.38781900  |
| H | -3.65197400 | 5.04702700  | 2.06712900  |
| C | -1.55929900 | 4.78201400  | 0.54295900  |
| C | -0.96383200 | 5.61100500  | 1.50016400  |
| H | -0.63109600 | 5.19931000  | 2.44849700  |
| C | -0.80240000 | 6.96566400  | 1.23373100  |
| H | -0.34688700 | 7.61050000  | 1.97643900  |
| C | -1.23362600 | 7.49266100  | 0.02190100  |
| H | -1.10732000 | 8.54956400  | -0.18270800 |
| C | -1.82000000 | 6.66647800  | -0.93106300 |
| H | -2.15147700 | 7.07592500  | -1.87812800 |
| C | -1.98237000 | 5.30920300  | -0.67588200 |
| H | -2.43453700 | 4.66138400  | -1.42052100 |
| C | 3.40142900  | 0.37959200  | -2.71423700 |
| C | 3.10862400  | 1.69566200  | -2.31777800 |
| C | 3.58383800  | 2.78095100  | -3.04894000 |
| C | 4.41798500  | 2.53109500  | -4.13839800 |
| H | 4.79339400  | 3.38160300  | -4.70690900 |
| C | 4.76217800  | 1.24583500  | -4.50995600 |
| H | 5.41714000  | 1.07480400  | -5.35521100 |
| C | 4.23660400  | 0.16200700  | -3.80660300 |
| H | 4.46932600  | -0.85117400 | -4.11441900 |
| C | -0.39577000 | 2.50953000  | 1.92176400  |
| C | 0.87744300  | 2.55328000  | 1.32287000  |
| C | 2.01489900  | 2.17900600  | 2.02688000  |
| C | 1.85789100  | 1.71898000  | 3.33308900  |
| H | 2.74543500  | 1.42823400  | 3.88733500  |
| C | 0.60974400  | 1.64494000  | 3.93575300  |
| H | 0.51237900  | 1.27868900  | 4.95202800  |
| C | -0.51831000 | 2.05705100  | 3.23465000  |
| H | -1.49274500 | 2.01677800  | 3.70302500  |

|   |             |             |             |
|---|-------------|-------------|-------------|
| C | 3.36767900  | 2.34855000  | 1.37876300  |
| H | 3.68433800  | 1.40864800  | 0.91910300  |
| H | 4.10781300  | 2.60257200  | 2.13738500  |
| C | 3.17209100  | 4.17915500  | -2.67334800 |
| H | 4.02435400  | 4.70344700  | -2.23098100 |
| H | 2.91157900  | 4.73502400  | -3.57787800 |
| C | 2.14578600  | 3.13655000  | -0.64106400 |
| C | 3.29510600  | 3.45058500  | 0.32197500  |
| H | 4.22177700  | 3.44790500  | -0.26192500 |
| C | 3.07605100  | 4.84224800  | 0.94058000  |
| H | 3.93064500  | 5.07584200  | 1.58160900  |
| H | 2.19641500  | 4.81513300  | 1.59430300  |
| C | 2.88150600  | 5.93722900  | -0.10877100 |
| H | 2.63714700  | 6.87960700  | 0.38802800  |
| H | 3.82207000  | 6.11233000  | -0.63980500 |
| C | 1.76077000  | 5.57668300  | -1.08809300 |
| H | 0.80650200  | 5.57946200  | -0.55824600 |
| H | 1.68468100  | 6.32818300  | -1.87960800 |
| C | 1.97070300  | 4.19729600  | -1.72412000 |
| H | 1.07270900  | 3.90956700  | -2.28376500 |
| C | -0.80560300 | -2.53687500 | 1.57514200  |
| C | 0.25321300  | -2.92652200 | 2.58157300  |
| C | -0.45045300 | -3.27331700 | 0.33314600  |
| C | 0.70762900  | -4.01356800 | 0.60863000  |
| O | 0.41014500  | -2.49805900 | 3.70953300  |
| N | 1.06758700  | -3.82390500 | 1.94793800  |
| C | -0.99825600 | -3.30922600 | -0.94113300 |
| C | 1.35197500  | -4.76409000 | -0.35457200 |
| C | -0.35766300 | -4.06442200 | -1.92940500 |
| C | 0.80104100  | -4.77853200 | -1.63593600 |
| H | 1.29140600  | -5.34770500 | -2.41818900 |
| H | 2.25372300  | -5.32071700 | -0.12510300 |
| H | -0.77452400 | -4.09942800 | -2.92964200 |
| H | -1.91015400 | -2.76192200 | -1.17575000 |
| H | 1.90054500  | -4.19828100 | 2.38778700  |
| C | -2.22503100 | -2.13020600 | 1.97548800  |
| C | -3.32641300 | -2.52355800 | 1.03322200  |
| C | -3.67738200 | -3.86625500 | 0.91335400  |
| C | -3.99910100 | -1.58359200 | 0.26232100  |
| C | -4.67014200 | -4.25997600 | 0.03340500  |
| H | -3.14198100 | -4.61670900 | 1.49181200  |
| C | -4.99208500 | -1.97697500 | -0.62789700 |
| H | -3.73819800 | -0.52828100 | 0.33578000  |
| C | -5.34083000 | -3.32140700 | -0.75904200 |
| H | -5.49152900 | -1.23175600 | -1.23797600 |
| H | -4.92501100 | -5.31038800 | -0.06145100 |
| C | -1.24663700 | -1.08361300 | 1.56279500  |
| H | -1.34753900 | -0.64018100 | 0.57965800  |

|   |              |             |             |
|---|--------------|-------------|-------------|
| H | -0.80971600  | -0.45399400 | 2.33618000  |
| C | 3.48862500   | -3.13139700 | 4.93554700  |
| C | 4.24706100   | -3.91540000 | 4.08607500  |
| C | 5.62872500   | -3.90510400 | 4.07679700  |
| C | 6.28443000   | -3.06249400 | 4.96884000  |
| C | 5.55509600   | -2.25548800 | 5.83793500  |
| C | 4.16300900   | -2.29345200 | 5.81936300  |
| H | 2.40499000   | -3.16486000 | 4.88955600  |
| H | 6.16626800   | -4.54693700 | 3.38966400  |
| H | 7.36763700   | -3.03857300 | 4.98739700  |
| H | 6.07109700   | -1.60788000 | 6.53657400  |
| H | 3.59207600   | -1.67406000 | 6.50147400  |
| F | 3.60760900   | -4.72402000 | 3.20347500  |
| C | -2.60090100  | -2.16880800 | 3.43448800  |
| H | -3.07982000  | -3.11407900 | 3.69297100  |
| H | -1.74980900  | -1.97759200 | 4.08734600  |
| F | -3.53689300  | -1.15396900 | 3.64899500  |
| C | -6.45487700  | -3.74715100 | -1.67862700 |
| C | -7.80537600  | -3.80873300 | -0.94630000 |
| H | -6.22319500  | -4.73844600 | -2.10155300 |
| H | -6.52748300  | -3.05399800 | -2.52364600 |
| C | -8.94316100  | -4.26347400 | -1.85431400 |
| H | -7.71811400  | -4.49525200 | -0.09256600 |
| H | -8.03106200  | -2.81634200 | -0.52765400 |
| C | -10.28116800 | -4.31310600 | -1.11141800 |
| H | -9.02310900  | -3.57723500 | -2.71233300 |
| H | -8.70666300  | -5.25561900 | -2.26768800 |
| H | -11.08957900 | -4.65189800 | -1.76867200 |
| H | -10.23365500 | -5.00784600 | -0.25576300 |
| H | -10.56000100 | -3.32200300 | -0.72531800 |

## (20) IM<sub>22</sub>-PhF

|                                               |             |             |                             |
|-----------------------------------------------|-------------|-------------|-----------------------------|
| Zero-point correction =                       |             |             | 1.192947 (Hartree/Particle) |
| Thermal correction to Energy =                |             |             | 1.268929                    |
| Thermal correction to Enthalpy =              |             |             | 1.269873                    |
| Thermal correction to Gibbs Free Energy =     |             |             | 1.070686                    |
| Sum of electronic and zero-point Energies =   |             |             | -4636.519295                |
| Sum of electronic and thermal Energies =      |             |             | -4636.443314                |
| Sum of electronic and thermal Enthalpies =    |             |             | -4636.442369                |
| Sum of electronic and thermal Free Energies = |             |             | -4636.641556                |
| Au                                            | -0.27634000 | -1.65054700 | -0.41198900                 |
| Au                                            | -0.74747100 | 1.48513400  | 1.86040300                  |
| P                                             | -2.01554100 | -3.12001000 | -1.04890100                 |
| P                                             | -1.60729300 | 3.20522700  | 0.63852400                  |
| Cl                                            | 0.27101300  | -0.33184700 | 3.02583800                  |
| O                                             | -3.56952800 | 1.24327800  | 0.11296500                  |
| O                                             | -3.69474800 | -1.00438600 | -0.03415600                 |
| C                                             | -2.87574300 | -2.78392600 | -2.61962700                 |

|   |             |             |             |
|---|-------------|-------------|-------------|
| C | -4.15245200 | -3.30220200 | -2.85549000 |
| H | -4.64967200 | -3.88988300 | -2.08991800 |
| C | -4.79067700 | -3.05473700 | -4.06519000 |
| H | -5.77974700 | -3.46020000 | -4.24494200 |
| C | -4.16059500 | -2.28679300 | -5.04124300 |
| H | -4.65934800 | -2.09541500 | -5.98452900 |
| C | -2.89041600 | -1.76985800 | -4.80874400 |
| H | -2.39689900 | -1.17556000 | -5.56938800 |
| C | -2.24686300 | -2.01627700 | -3.59948500 |
| H | -1.25896100 | -1.60455800 | -3.41605100 |
| C | -1.29429500 | -4.78723100 | -1.22822400 |
| C | -1.74173900 | -5.69159800 | -2.19210900 |
| H | -2.51775700 | -5.40669100 | -2.89372800 |
| C | -1.18182500 | -6.96269200 | -2.26394700 |
| H | -1.52912100 | -7.66003100 | -3.01745500 |
| C | -0.17977300 | -7.33617700 | -1.37582800 |
| H | 0.25504200  | -8.32720500 | -1.43638300 |
| C | 0.27062900  | -6.43597800 | -0.41446200 |
| H | 1.05553000  | -6.72242500 | 0.27570900  |
| C | -0.27869800 | -5.16170000 | -0.34202400 |
| H | 0.08552400  | -4.45980300 | 0.40393800  |
| C | -0.45468000 | 4.59949700  | 0.43122700  |
| C | 0.77211300  | 4.57233400  | 1.09305100  |
| H | 1.04874200  | 3.70562400  | 1.68587600  |
| C | 1.64308800  | 5.65317700  | 0.99387500  |
| H | 2.58809100  | 5.63124600  | 1.52494000  |
| C | 1.29483200  | 6.75898000  | 0.22802600  |
| H | 1.97151300  | 7.60265300  | 0.15425500  |
| C | 0.06640800  | 6.79478500  | -0.42909100 |
| H | -0.21268600 | 7.66389000  | -1.01336100 |
| C | -0.81131800 | 5.72515300  | -0.31952000 |
| H | -1.77794800 | 5.77094000  | -0.81167300 |
| C | -3.12836100 | 3.96305100  | 1.30218800  |
| C | -4.10067700 | 4.49575500  | 0.45372200  |
| H | -3.98145800 | 4.43216800  | -0.62397600 |
| C | -5.23848400 | 5.08916600  | 0.98913300  |
| H | -5.99361500 | 5.49791400  | 0.32710500  |
| C | -5.40720100 | 5.15535000  | 2.36926600  |
| H | -6.29547900 | 5.61671500  | 2.78503600  |
| C | -4.43787700 | 4.62636600  | 3.21538900  |
| H | -4.56944200 | 4.67223900  | 4.29010600  |
| C | -3.30043300 | 4.02706400  | 2.68477600  |
| H | -2.55249800 | 3.60082000  | 3.34655100  |
| C | -3.35609700 | -3.32264600 | 0.16265900  |
| C | -4.08447100 | -2.18281400 | 0.53742400  |
| C | -5.13816100 | -2.27766200 | 1.44349200  |
| C | -5.44479800 | -3.53010200 | 1.97358500  |
| H | -6.25993100 | -3.60414300 | 2.68697600  |

|   |             |             |             |
|---|-------------|-------------|-------------|
| C | -4.73147200 | -4.66499600 | 1.62007000  |
| H | -4.98245200 | -5.62650500 | 2.05031900  |
| C | -3.68333500 | -4.55907800 | 0.71247200  |
| H | -3.11613200 | -5.43980100 | 0.43294600  |
| C | -2.07898100 | 2.64126600  | -1.02681500 |
| C | -3.08398700 | 1.66382000  | -1.08848300 |
| C | -3.59178900 | 1.21503200  | -2.30568000 |
| C | -3.00668200 | 1.70296700  | -3.47283300 |
| H | -3.39453500 | 1.35990800  | -4.42741700 |
| C | -1.96674300 | 2.62384100  | -3.43643700 |
| H | -1.53038000 | 2.99050600  | -4.35779600 |
| C | -1.51591100 | 3.10870700  | -2.21202800 |
| H | -0.73120000 | 3.85661800  | -2.17797300 |
| C | -4.76254100 | 0.26639200  | -2.31591000 |
| H | -4.40906600 | -0.74442400 | -2.52113100 |
| H | -5.44505300 | 0.53707600  | -3.12654100 |
| C | -5.90510000 | -1.04291600 | 1.83121400  |
| H | -6.86053900 | -1.02353800 | 1.29672000  |
| H | -6.15049900 | -1.08079200 | 2.89553600  |
| C | -4.48795800 | 0.17088300  | 0.15879500  |
| C | -5.50651900 | 0.29575500  | -0.97778700 |
| H | -6.16795100 | -0.57634100 | -0.92290700 |
| C | -6.33351500 | 1.57520100  | -0.78927300 |
| H | -7.09418300 | 1.62282100  | -1.57355900 |
| H | -5.68310300 | 2.44671100  | -0.93172100 |
| C | -6.98339900 | 1.65306700  | 0.59276900  |
| H | -7.49050900 | 2.61474700  | 0.70674700  |
| H | -7.76131800 | 0.88716900  | 0.67780300  |
| C | -5.94569300 | 1.49764500  | 1.70772600  |
| H | -5.28007900 | 2.36199000  | 1.69953800  |
| H | -6.43465800 | 1.48422900  | 2.68624500  |
| C | -5.10229500 | 0.22647400  | 1.55452800  |
| H | -4.25350700 | 0.26109000  | 2.24801800  |
| C | 1.41613900  | -0.67449900 | 0.13799600  |
| C | 2.42388100  | -1.29249100 | 1.12147500  |
| C | 1.93888200  | 0.56798900  | -0.16526300 |
| C | 3.13345500  | 0.79071300  | 0.60252000  |
| O | 2.45338800  | -2.40646100 | 1.55270600  |
| N | 3.39422100  | -0.30072200 | 1.36173900  |
| C | 1.46331900  | 1.57062800  | -1.05408800 |
| C | 3.83083900  | 1.99760900  | 0.50471200  |
| C | 2.16817700  | 2.73400600  | -1.16704800 |
| C | 3.34352700  | 2.93089300  | -0.38668700 |
| H | 3.87763200  | 3.86963400  | -0.49660600 |
| H | 4.73301300  | 2.17765600  | 1.07481400  |
| H | 1.84170600  | 3.52710600  | -1.82936600 |
| H | 0.55267500  | 1.38508000  | -1.61671700 |
| H | 4.20775900  | -0.44249400 | 1.94756200  |

|   |             |             |             |
|---|-------------|-------------|-------------|
| C | 4.17651300  | -1.86314200 | -1.28732400 |
| C | 4.86771100  | -0.58459000 | -1.55102600 |
| C | 6.00763500  | -0.22150200 | -0.81322800 |
| C | 4.40956400  | 0.31531800  | -2.52207700 |
| C | 6.64532600  | 0.98915700  | -1.03701000 |
| H | 6.41385900  | -0.89804100 | -0.07122100 |
| C | 5.05217700  | 1.52317700  | -2.74031000 |
| H | 3.55378900  | 0.06341200  | -3.13768900 |
| C | 6.17808400  | 1.88770400  | -1.99850100 |
| H | 4.67803400  | 2.19710000  | -3.50600000 |
| H | 7.52844200  | 1.24154200  | -0.45686000 |
| C | 6.91470500  | 3.16917700  | -2.28264800 |
| H | 7.33426200  | 3.57257600  | -1.35481600 |
| H | 6.21880000  | 3.92052300  | -2.67137700 |
| C | 2.96236400  | -2.16220100 | -1.77418400 |
| H | 2.39928300  | -1.49188700 | -2.41167200 |
| H | 2.49603200  | -3.11901700 | -1.56303600 |
| C | 7.41133800  | -2.31429000 | 3.93560200  |
| C | 6.16574000  | -2.21135100 | 3.35027100  |
| C | 5.12197700  | -3.07525500 | 3.61496300  |
| C | 5.35039500  | -4.10170000 | 4.52691400  |
| C | 6.59154800  | -4.23903100 | 5.13947600  |
| C | 7.61801900  | -3.34784600 | 4.84337100  |
| H | 8.18930200  | -1.60433200 | 3.68378000  |
| H | 4.16222700  | -2.94804200 | 3.12535700  |
| H | 4.54885100  | -4.79312100 | 4.75770300  |
| H | 6.75917700  | -5.03963900 | 5.84960300  |
| H | 8.58603400  | -3.45406200 | 5.31846800  |
| F | 5.95628000  | -1.19641300 | 2.45546700  |
| C | 4.86037700  | -2.86140100 | -0.38662900 |
| H | 4.97180000  | -2.47419500 | 0.62986000  |
| H | 4.29557500  | -3.79315200 | -0.34559200 |
| F | 6.12951200  | -3.14226300 | -0.86036100 |
| C | 8.04697800  | 2.95759500  | -3.29705500 |
| C | 8.81032200  | 4.24241000  | -3.60766200 |
| H | 7.62696200  | 2.54220200  | -4.22011300 |
| H | 8.73781500  | 2.20036700  | -2.90938600 |
| C | 9.93571900  | 4.01639800  | -4.61275000 |
| H | 8.11307600  | 4.99356300  | -3.99515400 |
| H | 9.22090700  | 4.65396800  | -2.67903600 |
| H | 10.47095400 | 4.94208100  | -4.83026000 |
| H | 10.66172400 | 3.29388300  | -4.23181000 |
| H | 9.54609600  | 3.62702300  | -5.55665400 |

**(21) TS<sub>2-32</sub>-PhF**

|                                  |                             |
|----------------------------------|-----------------------------|
| Zero-point correction =          | 1.188696 (Hartree/Particle) |
| Thermal correction to Energy =   | 1.264211                    |
| Thermal correction to Enthalpy = | 1.265155                    |

|                                               |             |             |              |
|-----------------------------------------------|-------------|-------------|--------------|
| Thermal correction to Gibbs Free Energy =     |             |             | 1.067660     |
| Sum of electronic and zero-point Energies =   |             |             | -4636.508538 |
| Sum of electronic and thermal Energies =      |             |             | -4636.433023 |
| Sum of electronic and thermal Enthalpies =    |             |             | -4636.432079 |
| Sum of electronic and thermal Free Energies = |             |             | -4636.629575 |
| Au                                            | 0.18088000  | -1.69037200 | 0.48231200   |
| Au                                            | 0.68092400  | 1.33741600  | -1.83790900  |
| P                                             | 2.08153300  | -3.07785600 | 1.02770200   |
| P                                             | 1.53734200  | 3.22006400  | -0.71995200  |
| Cl                                            | -0.28331300 | -0.63907300 | -2.85659700  |
| O                                             | 3.55742200  | 1.34506200  | -0.10904700  |
| O                                             | 3.77646200  | -0.93378700 | 0.09158500   |
| C                                             | 2.96874000  | -2.71588100 | 2.61778100   |
| C                                             | 4.27188800  | -3.17709200 | 2.82403900   |
| H                                             | 4.77854200  | -3.73298900 | 2.04559600   |
| C                                             | 4.92101100  | -2.90609400 | 4.02812700   |
| H                                             | 5.92677400  | -3.26671600 | 4.18828200   |
| C                                             | 4.27145600  | -2.17401500 | 5.02334000   |
| H                                             | 4.77484200  | -1.96740200 | 5.95671400   |
| C                                             | 2.97163300  | -1.71383500 | 4.81504800   |
| H                                             | 2.46498400  | -1.15028100 | 5.58550800   |
| C                                             | 2.31771000  | -1.98490800 | 3.61250200   |
| H                                             | 1.31286900  | -1.61949600 | 3.44503200   |
| C                                             | 1.42352300  | -4.80840200 | 1.21640200   |
| C                                             | 1.94534400  | -5.69881100 | 2.15643600   |
| H                                             | 2.73620500  | -5.38775300 | 2.82473200   |
| C                                             | 1.43273200  | -6.99307300 | 2.24305300   |
| H                                             | 1.83370800  | -7.67931800 | 2.97481300   |
| C                                             | 0.40627600  | -7.39834900 | 1.39179800   |
| H                                             | 0.01141800  | -8.40134000 | 1.46225500   |
| C                                             | -0.11511400 | -6.50749700 | 0.45323100   |
| H                                             | -0.91360000 | -6.81640200 | -0.20522000  |
| C                                             | 0.38768700  | -5.21048100 | 0.36574300   |
| H                                             | -0.02853000 | -4.51842600 | -0.35743700  |
| C                                             | 0.36698500  | 4.65425400  | -0.59831200  |
| C                                             | -0.80670400 | 4.62674200  | -1.35105900  |
| H                                             | -1.05077900 | 3.75118000  | -1.93913000  |
| C                                             | -1.66871600 | 5.72365100  | -1.33462900  |
| H                                             | -2.57025500 | 5.70387700  | -1.93017300  |
| C                                             | -1.36219000 | 6.84047000  | -0.56029000  |
| H                                             | -2.02816100 | 7.69113200  | -0.55020600  |
| C                                             | -0.18437700 | 6.87016200  | 0.18913400   |
| H                                             | 0.06207700  | 7.74170700  | 0.77786800   |
| C                                             | 0.68624400  | 5.78345700  | 0.16281700   |
| H                                             | 1.61166200  | 5.82207800  | 0.72235300   |
| C                                             | 3.07454100  | 3.98468200  | -1.43091000  |
| C                                             | 4.00636200  | 4.61136500  | -0.60227800  |
| H                                             | 3.86667200  | 4.61491200  | 0.47152100   |



|   |             |             |             |
|---|-------------|-------------|-------------|
| C | 5.13289300  | 5.21374000  | -1.16162600 |
| H | 5.85576400  | 5.69812200  | -0.52069000 |
| C | 5.32422900  | 5.19130000  | -2.54364100 |
| H | 6.19641700  | 5.65982900  | -2.97565100 |
| C | 4.39170000  | 4.56151800  | -3.36716000 |
| H | 4.53998100  | 4.53825000  | -4.43681800 |
| C | 3.26459300  | 3.95521900  | -2.81196700 |
| H | 2.54631700  | 3.45397800  | -3.44793100 |
| C | 3.44993000  | -3.25912100 | -0.20236800 |
| C | 4.17570700  | -2.11346700 | -0.53833500 |
| C | 5.24016700  | -2.16799800 | -1.43625000 |
| C | 5.55405600  | -3.40329600 | -2.00981700 |
| H | 6.37146500  | -3.45317700 | -2.71693900 |
| C | 4.83681400  | -4.55156900 | -1.69350400 |
| H | 5.09094500  | -5.49564900 | -2.15069400 |
| C | 3.78089900  | -4.47955800 | -0.78458200 |
| H | 3.21758600  | -5.36647700 | -0.53121700 |
| C | 2.02395100  | 2.74763500  | 1.00238700  |
| C | 3.04598900  | 1.79853700  | 1.10179800  |
| C | 3.55515900  | 1.38477400  | 2.33145200  |
| C | 2.95324900  | 1.89546400  | 3.48470700  |
| H | 3.33426800  | 1.58310800  | 4.44842400  |
| C | 1.89674200  | 2.80116500  | 3.41065900  |
| H | 1.44755400  | 3.18514000  | 4.31454800  |
| C | 1.43975500  | 3.24160300  | 2.16642800  |
| H | 0.64067100  | 3.96713700  | 2.10378400  |
| C | 4.73212100  | 0.44157300  | 2.36675300  |
| H | 4.37931100  | -0.57189500 | 2.55132200  |
| H | 5.39602200  | 0.71340800  | 3.18978500  |
| C | 6.00424700  | -0.91237500 | -1.76622100 |
| H | 6.93001500  | -0.87873100 | -1.18506000 |
| H | 6.29713600  | -0.92595200 | -2.81722800 |
| C | 4.53385700  | 0.29098900  | -0.12028800 |
| C | 5.51345900  | 0.47243200  | 1.04315300  |
| H | 6.20177000  | -0.37766800 | 1.02493300  |
| C | 6.30944800  | 1.77422900  | 0.84739000  |
| H | 7.04496200  | 1.86066700  | 1.64930700  |
| H | 5.62969200  | 2.62736300  | 0.94312700  |
| C | 6.99618500  | 1.83126800  | -0.52318100 |
| H | 7.49085900  | 2.79613700  | -0.64640300 |
| H | 7.78134000  | 1.07175900  | -0.57279600 |
| C | 5.98248600  | 1.63725100  | -1.66016700 |
| H | 5.29300100  | 2.47977100  | -1.66789700 |
| H | 6.48966600  | 1.62583800  | -2.62717700 |
| C | 5.16553200  | 0.34461400  | -1.50909300 |
| H | 4.32829100  | 0.35733400  | -2.21405000 |
| C | -1.61525700 | -0.81936800 | 0.06822800  |
| C | -2.58826800 | -1.42963400 | -0.94756900 |

|   |             |             |             |
|---|-------------|-------------|-------------|
| C | -2.04472100 | 0.52385600  | 0.21129900  |
| C | -3.19076600 | 0.74575400  | -0.60985500 |
| O | -2.63017300 | -2.59140200 | -1.34875600 |
| N | -3.49807900 | -0.42552700 | -1.27618400 |
| C | -1.52307200 | 1.57378600  | 0.99478100  |
| C | -3.81633700 | 1.98896000  | -0.65513700 |
| C | -2.15177800 | 2.80209100  | 0.96162100  |
| C | -3.29199800 | 2.99570200  | 0.14720000  |
| H | -3.76465600 | 3.96863200  | 0.14120200  |
| H | -4.68795700 | 2.15821800  | -1.26879600 |
| H | -1.77632700 | 3.63141700  | 1.54333200  |
| H | -0.63922200 | 1.39894400  | 1.59703400  |
| H | -4.27795200 | -0.57707600 | -1.89974100 |
| C | -4.08978600 | -1.69866900 | 1.44586900  |
| C | -4.82395000 | -0.45445300 | 1.64492800  |
| C | -5.99555600 | -0.18217900 | 0.90129600  |
| C | -4.36339100 | 0.53500200  | 2.53442700  |
| C | -6.64686600 | 1.03352800  | 1.02966200  |
| H | -6.38956700 | -0.92598500 | 0.22419800  |
| C | -5.02297500 | 1.74796400  | 2.65727900  |
| H | -3.49710000 | 0.34680100  | 3.15186800  |
| C | -6.16736800 | 2.02565400  | 1.89938300  |
| H | -4.65025500 | 2.49424200  | 3.34698400  |
| H | -7.53941500 | 1.22695300  | 0.44876500  |
| C | -6.91103300 | 3.32389900  | 2.06702000  |
| H | -7.31271300 | 3.65154300  | 1.10443100  |
| H | -6.22630100 | 4.10204800  | 2.41378300  |
| C | -2.79191700 | -1.87038900 | 1.84226700  |
| H | -2.27739400 | -1.15884500 | 2.46881200  |
| H | -2.31353900 | -2.83326300 | 1.72581100  |
| C | -7.31820800 | -2.76943500 | -3.79353300 |
| C | -6.07366700 | -2.65188000 | -3.20898300 |
| C | -5.00481400 | -3.48523100 | -3.46913500 |
| C | -5.20891500 | -4.51190200 | -4.39315500 |
| C | -6.44903300 | -4.67054100 | -5.01204400 |
| C | -7.50020300 | -3.80314800 | -4.71326300 |
| H | -8.10893500 | -2.08131900 | -3.53828900 |
| H | -4.05782600 | -3.33534000 | -2.96958300 |
| H | -4.39503700 | -5.18162400 | -4.62667400 |
| H | -6.59614500 | -5.46690500 | -5.72619700 |
| H | -8.46038800 | -3.92745000 | -5.19114500 |
| F | -5.88142900 | -1.60405300 | -2.27319200 |
| C | -4.77693900 | -2.82601400 | 0.71511600  |
| H | -4.96714900 | -2.58886600 | -0.33122900 |
| H | -4.20264200 | -3.74474800 | 0.78042300  |
| F | -6.05437200 | -3.06192500 | 1.32479500  |
| C | -8.07154500 | 3.19193200  | 3.07317500  |
| C | -8.82845200 | 4.50835400  | 3.26979400  |

|   |              |            |            |
|---|--------------|------------|------------|
| H | -7.67570100  | 2.84636100 | 4.03265700 |
| H | -8.76199400  | 2.41788200 | 2.72530900 |
| C | -9.98524500  | 4.36772200 | 4.26184600 |
| H | -8.13133900  | 5.27479400 | 3.62052800 |
| H | -9.20972400  | 4.85240100 | 2.30408900 |
| H | -10.51067600 | 5.31244100 | 4.39549700 |
| H | -10.70699600 | 3.62814000 | 3.91226800 |
| H | -9.62150500  | 4.04387700 | 5.23808200 |

**(22) IM<sub>32</sub>-PhF**

|                                               |             |             |                             |
|-----------------------------------------------|-------------|-------------|-----------------------------|
| Zero-point correction =                       |             |             | 1.193097 (Hartree/Particle) |
| Thermal correction to Energy =                |             |             | 1.268669                    |
| Thermal correction to Enthalpy =              |             |             | 1.269613                    |
| Thermal correction to Gibbs Free Energy =     |             |             | 1.069027                    |
| Sum of electronic and zero-point Energies =   |             |             | -4636.548441                |
| Sum of electronic and thermal Energies =      |             |             | -4636.472870                |
| Sum of electronic and thermal Enthalpies =    |             |             | -4636.471925                |
| Sum of electronic and thermal Free Energies = |             |             | -4636.672511                |
| Au                                            | 1.82342200  | -0.94101400 | -0.85795200                 |
| Au                                            | -1.36192400 | -0.66847100 | -2.12826400                 |
| P                                             | 2.70668600  | -1.81967600 | 1.05673400                  |
| P                                             | -3.24765700 | -1.78444200 | -1.51697400                 |
| Cl                                            | 0.83996500  | 0.19195200  | -2.84595500                 |
| O                                             | -2.00183000 | -1.44297100 | 1.01237200                  |
| O                                             | 0.04766400  | -1.09347600 | 1.84802800                  |
| C                                             | 2.12020900  | -3.47192800 | 1.53035200                  |
| C                                             | 2.42711400  | -3.94330900 | 2.81137500                  |
| H                                             | 2.96946600  | -3.31772300 | 3.50746800                  |
| C                                             | 2.03094200  | -5.21956500 | 3.18389000                  |
| H                                             | 2.27078500  | -5.59179500 | 4.17538200                  |
| C                                             | 1.32571000  | -6.02502900 | 2.28772300                  |
| H                                             | 1.02356500  | -7.02410600 | 2.58145800                  |
| C                                             | 1.01741800  | -5.54833200 | 1.01741900                  |
| H                                             | 0.46368200  | -6.16565300 | 0.32291800                  |
| C                                             | 1.40598400  | -4.26772200 | 0.63972200                  |
| H                                             | 1.14932300  | -3.88636900 | -0.34642000                 |
| C                                             | 4.52128700  | -1.91046600 | 1.02509000                  |
| C                                             | 5.21859400  | -3.09913400 | 1.22832200                  |
| H                                             | 4.68212300  | -4.02924800 | 1.39047500                  |
| C                                             | 6.61088000  | -3.09804000 | 1.22497100                  |
| H                                             | 7.14401200  | -4.02477900 | 1.38065400                  |
| C                                             | 7.30465500  | -1.91020100 | 1.03984000                  |
| H                                             | 8.38880500  | -1.90522200 | 1.05552700                  |
| C                                             | 6.60698300  | -0.71772700 | 0.82850600                  |
| H                                             | 7.14216000  | 0.21440800  | 0.68988100                  |
| C                                             | 5.22090000  | -0.71998900 | 0.79284100                  |
| H                                             | 4.69285800  | 0.20797100  | 0.61211900                  |
| C                                             | -4.06100200 | -2.58788800 | -2.93491900                 |

|   |             |             |             |
|---|-------------|-------------|-------------|
| C | -3.26710600 | -3.05871000 | -3.97914300 |
| H | -2.19348500 | -2.89643700 | -3.97305900 |
| C | -3.85133100 | -3.74110200 | -5.04413900 |
| H | -3.23103900 | -4.10653700 | -5.85255900 |
| C | -5.22912900 | -3.93410800 | -5.06543000 |
| H | -5.68424600 | -4.46029800 | -5.90277600 |
| C | -6.02207000 | -3.45045900 | -4.03380800 |
| H | -7.09591500 | -3.59809900 | -4.05594500 |
| C | -5.43976200 | -2.77987500 | -2.96132700 |
| H | -6.06514400 | -2.40209300 | -2.16400800 |
| C | -4.53855900 | -0.88726100 | -0.60328400 |
| C | -5.30919500 | -1.57240500 | 0.33696000  |
| H | -5.12455300 | -2.62422100 | 0.53718500  |
| C | -6.32265700 | -0.90836800 | 1.01433400  |
| H | -6.92386000 | -1.43941900 | 1.74068700  |
| C | -6.56926100 | 0.43760900  | 0.75749800  |
| H | -7.35710500 | 0.95143500  | 1.29201700  |
| C | -5.79156700 | 1.12622900  | -0.17313800 |
| H | -5.97382900 | 2.17654200  | -0.36082900 |
| C | -4.77290600 | 0.46715600  | -0.85519800 |
| H | -4.16086000 | 1.00187400  | -1.57187700 |
| C | 2.29450800  | -0.71026200 | 2.43374400  |
| C | 0.93658000  | -0.38939300 | 2.59987800  |
| C | 0.54247500  | 0.63258400  | 3.45807800  |
| C | 1.52196200  | 1.23226500  | 4.25525900  |
| H | 1.21830300  | 2.02508900  | 4.93577700  |
| C | 2.85413900  | 0.85242000  | 4.17659400  |
| H | 3.59311500  | 1.31532900  | 4.82268200  |
| C | 3.24573500  | -0.09582000 | 3.23883000  |
| H | 4.29397100  | -0.34990400 | 3.13398200  |
| C | -2.77016500 | -3.14015900 | -0.40888500 |
| C | -2.17445200 | -2.78439000 | 0.81191400  |
| C | -1.87023500 | -3.74383000 | 1.77399900  |
| C | -2.15400000 | -5.07628400 | 1.47557400  |
| H | -1.93646700 | -5.83315000 | 2.22834000  |
| C | -2.71120300 | -5.45672000 | 0.25823300  |
| H | -2.92104100 | -6.49452800 | 0.05516600  |
| C | -3.02829300 | -4.48107100 | -0.68297800 |
| H | -3.48667600 | -4.76322400 | -1.62544900 |
| C | -1.29649400 | -3.30481800 | 3.09123400  |
| H | -0.20585300 | -3.38787600 | 3.05514200  |
| H | -1.64884000 | -3.96088200 | 3.88700400  |
| C | -0.88401000 | 1.11036200  | 3.46828100  |
| H | -1.32114700 | 0.92964900  | 4.45585800  |
| H | -0.89593100 | 2.19403100  | 3.31300900  |
| C | -1.34542100 | -0.98562700 | 2.17496700  |
| C | -1.70637200 | -1.85821100 | 3.37649400  |
| H | -1.14069900 | -1.48887700 | 4.23550600  |

|   |             |             |             |
|---|-------------|-------------|-------------|
| C | -3.21222900 | -1.72948600 | 3.66439100  |
| H | -3.45347700 | -2.31601700 | 4.55736700  |
| H | -3.77350800 | -2.17428000 | 2.83804500  |
| C | -3.66749800 | -0.27897200 | 3.84208300  |
| H | -4.75673500 | -0.24548500 | 3.94045500  |
| H | -3.26310400 | 0.11504800  | 4.78345700  |
| C | -3.23587400 | 0.59891800  | 2.66225200  |
| H | -3.80198600 | 0.32040600  | 1.77023600  |
| H | -3.44846600 | 1.65557600  | 2.85275200  |
| C | -1.73856000 | 0.47150500  | 2.36363600  |
| H | -1.52658400 | 0.97859800  | 1.41794000  |
| C | 0.22998000  | 3.81006900  | 0.05701800  |
| C | -1.13415100 | 4.06475900  | 0.54137600  |
| C | 0.60694500  | 4.90287900  | -0.73529100 |
| C | -0.49343000 | 5.81478700  | -0.75292900 |
| O | -1.82404200 | 3.35915700  | 1.26114800  |
| N | -1.50906400 | 5.29119400  | 0.01316700  |
| C | 1.78224700  | 5.23201100  | -1.45028900 |
| C | -0.44369200 | 7.00730300  | -1.45959200 |
| C | 1.82894000  | 6.41696800  | -2.15164300 |
| C | 0.72626100  | 7.29887600  | -2.15290900 |
| H | 0.79021800  | 8.22130000  | -2.70982700 |
| H | -1.28345700 | 7.69299800  | -1.46543900 |
| H | 2.71850600  | 6.68565500  | -2.70376300 |
| H | 2.62949900  | 4.55538200  | -1.45733100 |
| H | -2.43806200 | 5.67435000  | 0.11994600  |
| C | 2.36881400  | 2.84789600  | 0.93740200  |
| C | 3.55263300  | 2.58787300  | 0.18554100  |
| C | 4.84187900  | 2.90848900  | 0.69416600  |
| C | 3.51572100  | 2.06746100  | -1.12922500 |
| C | 5.97903400  | 2.73752900  | -0.07642300 |
| H | 4.95179500  | 3.31995500  | 1.69081100  |
| C | 4.66547200  | 1.88586300  | -1.88004600 |
| H | 2.56468000  | 1.86459700  | -1.60303600 |
| C | 5.92610000  | 2.23389400  | -1.38110000 |
| H | 4.57520500  | 1.50660500  | -2.89146700 |
| H | 6.94042700  | 3.03504700  | 0.33517200  |
| C | 7.16421000  | 2.12773000  | -2.23340200 |
| H | 6.87452500  | 1.89987100  | -3.26095200 |
| H | 7.66355200  | 3.10492800  | -2.26353200 |
| C | 0.97577300  | 2.57030900  | 0.43690800  |
| H | 0.99235100  | 1.87105500  | -0.40469900 |
| H | 0.40574300  | 2.08510100  | 1.23140300  |
| C | -6.73412000 | 4.97511700  | 0.31112300  |
| C | -5.39979200 | 4.84633700  | 0.65166900  |
| C | -4.96189200 | 4.04320000  | 1.68940800  |
| C | -5.91002200 | 3.34982200  | 2.43407200  |
| C | -7.24783900 | 3.48810300  | 2.11436300  |

|   |             |             |             |
|---|-------------|-------------|-------------|
| C | -7.68277600 | 4.27235100  | 1.05554400  |
| H | -7.02477300 | 5.60683300  | -0.51764200 |
| H | -3.89505900 | 3.94730300  | 1.88197600  |
| H | -5.62843800 | 2.70226700  | 3.26110400  |
| H | -8.73851900 | 4.33470200  | 0.83223600  |
| F | -4.48437900 | 5.54178500  | -0.07471800 |
| C | 2.44972900  | 3.68047700  | 2.18169000  |
| H | 3.16980000  | 3.28397200  | 2.89641700  |
| H | 2.72219400  | 4.71830700  | 1.94346300  |
| F | 1.21753000  | 3.72348500  | 2.82253500  |
| C | 8.16283500  | 1.07336600  | -1.74870300 |
| C | 9.39968800  | 0.97332200  | -2.64027800 |
| H | 7.66728200  | 0.09811600  | -1.69431000 |
| H | 8.48454600  | 1.31870100  | -0.72545400 |
| C | 10.39982600 | -0.06203900 | -2.12813200 |
| H | 9.09360900  | 0.72151900  | -3.66015500 |
| H | 9.88257800  | 1.95943200  | -2.70106900 |
| H | 11.27733800 | -0.11899800 | -2.76586800 |
| H | 10.73422900 | 0.18756100  | -1.11754300 |
| H | 9.94075900  | -1.05706500 | -2.08782000 |
| H | -7.97518100 | 2.93840500  | 2.68866900  |

**(23) IM<sub>42</sub>-PhF**

|                                               |             |             |                             |
|-----------------------------------------------|-------------|-------------|-----------------------------|
| Zero-point correction =                       |             |             | 1.196117 (Hartree/Particle) |
| Thermal correction to Energy =                |             |             | 1.271065                    |
| Thermal correction to Enthalpy =              |             |             | 1.272009                    |
| Thermal correction to Gibbs Free Energy =     |             |             | 1.074075                    |
| Sum of electronic and zero-point Energies =   |             |             | -4636.603536                |
| Sum of electronic and thermal Energies =      |             |             | -4636.528589                |
| Sum of electronic and thermal Enthalpies =    |             |             | -4636.527644                |
| Sum of electronic and thermal Free Energies = |             |             | -4636.725579                |
| Au                                            | -0.05065100 | 0.64352200  | -1.12600100                 |
| Au                                            | 2.08000900  | -1.93769200 | -0.91921600                 |
| P                                             | 0.20786100  | 2.89011000  | -0.80524200                 |
| P                                             | 4.34045100  | -2.01450700 | -0.65171700                 |
| Cl                                            | -0.30587600 | -1.81311600 | -1.48717900                 |
| O                                             | 3.82233200  | 0.32438000  | 0.89021900                  |
| O                                             | 2.16624400  | 1.82828500  | 1.03525000                  |
| C                                             | 1.70724400  | 3.65601700  | -1.48218800                 |
| C                                             | 2.04443500  | 4.95728300  | -1.09556100                 |
| H                                             | 1.43477000  | 5.48425500  | -0.36733100                 |
| C                                             | 3.16289800  | 5.57232500  | -1.64294500                 |
| H                                             | 3.42263900  | 6.58233800  | -1.34751100                 |
| C                                             | 3.94760300  | 4.88987300  | -2.57080400                 |
| H                                             | 4.81699100  | 5.37351500  | -3.00210000                 |
| C                                             | 3.61700500  | 3.59334300  | -2.94781200                 |
| H                                             | 4.23320200  | 3.05760500  | -3.66027800                 |
| C                                             | 2.49790700  | 2.97216500  | -2.40214600                 |

|   |             |             |             |
|---|-------------|-------------|-------------|
| H | 2.24234300  | 1.95615200  | -2.68684700 |
| C | -1.20379900 | 3.83784500  | -1.45489800 |
| C | -1.05400300 | 4.95791300  | -2.27123200 |
| H | -0.06997300 | 5.30647900  | -2.56144300 |
| C | -2.18416200 | 5.62628700  | -2.73522500 |
| H | -2.06688600 | 6.49267500  | -3.37572100 |
| C | -3.45393600 | 5.18598800  | -2.38391200 |
| H | -4.32903800 | 5.71369300  | -2.74535700 |
| C | -3.60664500 | 4.06190700  | -1.57471500 |
| H | -4.59644600 | 3.71174500  | -1.30081000 |
| C | -2.48413200 | 3.38305300  | -1.11909300 |
| H | -2.59162800 | 2.49348700  | -0.50506300 |
| C | 5.12412300  | -3.12889500 | -1.85544600 |
| C | 4.53021100  | -3.27901100 | -3.11166600 |
| H | 3.58733400  | -2.78710000 | -3.33165800 |
| C | 5.14229900  | -4.06502900 | -4.07951500 |
| H | 4.67754300  | -4.18163700 | -5.05150000 |
| C | 6.34100700  | -4.71126400 | -3.79450800 |
| H | 6.81300100  | -5.33146800 | -4.54762000 |
| C | 6.92843500  | -4.57218300 | -2.54154700 |
| H | 7.85625800  | -5.08449800 | -2.31612800 |
| C | 6.32556700  | -3.78008100 | -1.57099800 |
| H | 6.78537200  | -3.68266200 | -0.59372400 |
| C | 4.94016600  | -2.49421500 | 0.99490300  |
| C | 6.18378500  | -2.04706600 | 1.44819200  |
| H | 6.78263200  | -1.38277200 | 0.83200800  |
| C | 6.65120900  | -2.44937600 | 2.69429600  |
| H | 7.61755000  | -2.10446200 | 3.04382900  |
| C | 5.87846000  | -3.29028400 | 3.49066400  |
| H | 6.24465200  | -3.60363100 | 4.46144500  |
| C | 4.63604100  | -3.72822000 | 3.04322900  |
| H | 4.03414200  | -4.38239700 | 3.66344800  |
| C | 4.16460700  | -3.33118200 | 1.79636700  |
| H | 3.19514900  | -3.67232900 | 1.44593300  |
| C | 0.24437800  | 3.19321500  | 0.98765300  |
| C | 1.21432100  | 2.50672300  | 1.73932100  |
| C | 1.16284900  | 2.49542700  | 3.12877000  |
| C | 0.20215600  | 3.28495000  | 3.76061200  |
| H | 0.16838400  | 3.28612300  | 4.84621900  |
| C | -0.71685400 | 4.02780600  | 3.03703000  |
| H | -1.45229900 | 4.63836500  | 3.54646600  |
| C | -0.71534500 | 3.95595400  | 1.64611100  |
| H | -1.46655100 | 4.48873100  | 1.07462600  |
| C | 5.05943500  | -0.37906700 | -0.96910700 |
| C | 4.66842500  | 0.66996900  | -0.12697200 |
| C | 5.17363800  | 1.95623700  | -0.29797100 |
| C | 6.08370800  | 2.16939500  | -1.33100800 |
| H | 6.49290600  | 3.16700500  | -1.45954700 |

|   |             |             |             |
|---|-------------|-------------|-------------|
| C | 6.47165800  | 1.14593000  | -2.18555000 |
| H | 7.18286000  | 1.33621800  | -2.98015400 |
| C | 5.95793300  | -0.13373800 | -2.00516700 |
| H | 6.26202700  | -0.94261600 | -2.66012200 |
| C | 4.73356800  | 3.04081000  | 0.64684500  |
| H | 3.88358100  | 3.57497900  | 0.21215500  |
| H | 5.53747900  | 3.76830500  | 0.78625400  |
| C | 2.07269300  | 1.58887600  | 3.91304700  |
| H | 2.74447900  | 2.19155400  | 4.53116400  |
| H | 1.46335700  | 0.99806800  | 4.60622800  |
| C | 3.30205900  | 1.32180300  | 1.74400700  |
| C | 4.33610000  | 2.42486900  | 1.98839100  |
| H | 3.86003900  | 3.19065400  | 2.61009500  |
| C | 5.54456900  | 1.83601000  | 2.73555300  |
| H | 6.24885100  | 2.64376500  | 2.95343600  |
| H | 6.06989900  | 1.13798800  | 2.07339400  |
| C | 5.15636000  | 1.10599200  | 4.02227300  |
| H | 6.04072400  | 0.62911700  | 4.45261700  |
| H | 4.81343900  | 1.83049000  | 4.76709900  |
| C | 4.08140300  | 0.04618500  | 3.76305300  |
| H | 4.50564700  | -0.76236500 | 3.16383500  |
| H | 3.74590600  | -0.39918400 | 4.70511700  |
| C | 2.86816600  | 0.62242800  | 3.02701100  |
| H | 2.21353500  | -0.19248600 | 2.70435300  |
| C | -4.47436200 | -0.72011600 | -0.53252500 |
| C | -3.17876500 | -0.51113900 | 0.20254400  |
| C | -4.64243600 | -2.19480900 | -0.59596100 |
| C | -3.56803400 | -2.76395500 | 0.09567800  |
| O | -2.57477500 | 0.53953800  | 0.38420100  |
| N | -2.75148900 | -1.73847300 | 0.60198300  |
| C | -5.57983100 | -3.01625100 | -1.20071800 |
| C | -3.39820500 | -4.13111300 | 0.20674100  |
| C | -5.42483300 | -4.39951500 | -1.09795400 |
| C | -4.35015700 | -4.94674600 | -0.40430400 |
| H | -4.24589800 | -6.02360600 | -0.33934500 |
| H | -2.55403300 | -4.55241600 | 0.74016900  |
| H | -6.15040900 | -5.05387400 | -1.56575600 |
| H | -6.42095600 | -2.59758600 | -1.74219100 |
| H | -1.80666100 | -1.86903500 | 0.93686100  |
| C | -5.64352700 | 0.27320700  | -0.43614200 |
| C | -7.02846100 | -0.29850200 | -0.44423400 |
| C | -7.45415600 | -1.11430700 | 0.60430000  |
| C | -7.91725800 | -0.00552300 | -1.47363900 |
| C | -8.73653100 | -1.64173600 | 0.60884100  |
| H | -6.76147400 | -1.36338800 | 1.40346100  |
| C | -9.20282400 | -0.53778700 | -1.46576300 |
| H | -7.60012700 | 0.64360400  | -2.28348900 |
| C | -9.62955100 | -1.36790000 | -0.43028800 |



|   |              |             |             |
|---|--------------|-------------|-------------|
| H | -9.88513600  | -0.30583700 | -2.27805000 |
| H | -9.04919100  | -2.28965100 | 1.42240900  |
| C | -11.03296400 | -1.91486000 | -0.39394900 |
| H | -11.42367100 | -2.00698400 | -1.41212700 |
| H | -11.02265500 | -2.92387800 | 0.03131600  |
| C | -4.81673900  | 0.21870300  | -1.67075100 |
| H | -5.23411200  | -0.25157600 | -2.55308400 |
| H | -4.11034700  | 1.02316700  | -1.84957600 |
| C | 0.24954300   | -1.61473400 | 3.99054300  |
| C | -0.30919800  | -0.82079100 | 3.00378100  |
| C | -1.16915300  | 0.22595600  | 3.26839300  |
| C | -1.48431700  | 0.48214700  | 4.60102000  |
| C | -0.94159500  | -0.29298400 | 5.62081200  |
| C | -0.07553400  | -1.34094600 | 5.31476000  |
| H | 0.91880800   | -2.42268800 | 3.71772200  |
| H | -1.57368000  | 0.80701800  | 2.44639000  |
| H | -2.15831900  | 1.29773900  | 4.83668100  |
| H | -1.19643900  | -0.08717600 | 6.65367000  |
| H | 0.34449500   | -1.95031800 | 6.10627300  |
| F | 0.01464300   | -1.08464500 | 1.70885000  |
| C | -5.49656700  | 1.48718100  | 0.44621800  |
| H | -5.94155500  | 1.31356900  | 1.42831100  |
| H | -4.45864600  | 1.79860800  | 0.55428600  |
| F | -6.19716500  | 2.53363400  | -0.14569400 |
| C | -11.97312000 | -1.02946100 | 0.43309100  |
| C | -13.38743900 | -1.59587400 | 0.52404300  |
| H | -12.00102900 | -0.02553900 | -0.00624500 |
| H | -11.55878100 | -0.90913900 | 1.44088300  |
| C | -14.31561300 | -0.71132800 | 1.35107400  |
| H | -13.79582300 | -1.71926600 | -0.48494700 |
| H | -13.34585400 | -2.59931600 | 0.96199200  |
| H | -15.31830700 | -1.13651400 | 1.42216700  |
| H | -13.93412300 | -0.58717600 | 2.36785000  |
| H | -14.40682100 | 0.28397300  | 0.90886900  |

**(24) IM<sub>2i</sub>-PhF**

|                                               |             |             |                             |
|-----------------------------------------------|-------------|-------------|-----------------------------|
| Zero-point correction =                       |             |             | 1.191491 (Hartree/Particle) |
| Thermal correction to Energy =                |             |             | 1.267807                    |
| Thermal correction to Enthalpy =              |             |             | 1.268751                    |
| Thermal correction to Gibbs Free Energy =     |             |             | 1.067446                    |
| Sum of electronic and zero-point Energies =   |             |             | -4636.519720                |
| Sum of electronic and thermal Energies =      |             |             | -4636.443404                |
| Sum of electronic and thermal Enthalpies =    |             |             | -4636.442459                |
| Sum of electronic and thermal Free Energies = |             |             | -4636.643765                |
| Au                                            | -0.51706600 | 1.89080500  | 0.58948500                  |
| Au                                            | -0.91916400 | -0.73962600 | -1.96788300                 |
| P                                             | -2.82362800 | 2.55700400  | 0.65024100                  |
| P                                             | -0.47974300 | -2.80507000 | -1.05860000                 |

|    |             |             |             |
|----|-------------|-------------|-------------|
| Cl | -1.28179300 | 1.53931700  | -2.61416100 |
| O  | -2.95022900 | -2.12351600 | -0.06102100 |
| O  | -3.90404700 | -0.08114500 | 0.12929000  |
| C  | -3.60192200 | 2.16839300  | 2.26051500  |
| C  | -4.99054000 | 2.12387200  | 2.40811700  |
| H  | -5.63419900 | 2.32260900  | 1.55696600  |
| C  | -5.55101700 | 1.82202300  | 3.64457900  |
| H  | -6.62920000 | 1.79015400  | 3.75295500  |
| C  | -4.73204100 | 1.56798000  | 4.74121500  |
| H  | -5.17240500 | 1.33594400  | 5.70425000  |
| C  | -3.34912500 | 1.61946400  | 4.60091200  |
| H  | -2.70776000 | 1.42821700  | 5.45387700  |
| C  | -2.78501700 | 1.91541600  | 3.36411300  |
| H  | -1.70494200 | 1.94685400  | 3.25495000  |
| C  | -2.72979300 | 4.37980700  | 0.58060100  |
| C  | -3.45347100 | 5.20520200  | 1.44019900  |
| H  | -4.08499700 | 4.77547500  | 2.21029600  |
| C  | -3.35996600 | 6.58762900  | 1.31241700  |
| H  | -3.91966300 | 7.22800000  | 1.98436600  |
| C  | -2.55605300 | 7.14553700  | 0.32486300  |
| H  | -2.48847200 | 8.22305600  | 0.22683000  |
| C  | -1.83505400 | 6.32268700  | -0.53583100 |
| H  | -1.20504800 | 6.75458700  | -1.30451500 |
| C  | -1.91290800 | 4.94198800  | -0.40616600 |
| H  | -1.34866800 | 4.30040400  | -1.07875600 |
| C  | 1.23004400  | -3.40006800 | -1.22518800 |
| C  | 2.10322500  | -2.72353600 | -2.07665300 |
| H  | 1.75616200  | -1.86077300 | -2.63519700 |
| C  | 3.42606300  | -3.13871100 | -2.20022100 |
| H  | 4.10334300  | -2.57926300 | -2.83598100 |
| C  | 3.87323500  | -4.24404700 | -1.48853100 |
| H  | 4.90549800  | -4.56415500 | -1.57508800 |
| C  | 2.99378400  | -4.95127300 | -0.66927500 |
| H  | 3.33584500  | -5.83101500 | -0.13562900 |
| C  | 1.67627900  | -4.53527500 | -0.53750900 |
| H  | 0.99398000  | -5.09878600 | 0.09166000  |
| C  | -1.54747000 | -4.17153100 | -1.62146900 |
| C  | -1.91453600 | -5.20631600 | -0.75959100 |
| H  | -1.59501700 | -5.19515900 | 0.27841200  |
| C  | -2.71497600 | -6.24324300 | -1.22590000 |
| H  | -3.00125800 | -7.04603500 | -0.55613100 |
| C  | -3.15141600 | -6.24841400 | -2.54769000 |
| H  | -3.77711600 | -7.05704900 | -2.90733600 |
| C  | -2.79070200 | -5.21413400 | -3.40500400 |
| H  | -3.13453800 | -5.21298500 | -4.43276800 |
| C  | -1.99163300 | -4.17365700 | -2.94336900 |
| H  | -1.71965000 | -3.35948900 | -3.60843300 |
| C  | -4.11906800 | 2.15094200  | -0.56290700 |

|   |             |             |             |
|---|-------------|-------------|-------------|
| C | -4.56010900 | 0.82644700  | -0.65664800 |
| C | -5.64344400 | 0.48474900  | -1.46284300 |
| C | -6.23879800 | 1.48291100  | -2.22995800 |
| H | -7.07087800 | 1.21654200  | -2.87429800 |
| C | -5.79013000 | 2.79406900  | -2.18141800 |
| H | -6.25947900 | 3.55680300  | -2.79013400 |
| C | -4.73911600 | 3.12929800  | -1.33633100 |
| H | -4.40101400 | 4.15681400  | -1.27935900 |
| C | -0.83082000 | -2.64500100 | 0.72881000  |
| C | -2.13737200 | -2.22410200 | 1.01998700  |
| C | -2.57521700 | -1.97915300 | 2.31748300  |
| C | -1.66006600 | -2.18716600 | 3.34916400  |
| H | -1.98316700 | -2.02210400 | 4.37271200  |
| C | -0.36297100 | -2.61780400 | 3.09196000  |
| H | 0.32316800  | -2.79335900 | 3.91256600  |
| C | 0.05896000  | -2.83875000 | 1.78195600  |
| H | 1.07351600  | -3.16905300 | 1.58749900  |
| C | -3.99622300 | -1.52200200 | 2.53698700  |
| H | -4.00275700 | -0.43876500 | 2.67731100  |
| H | -4.39313100 | -1.96657600 | 3.45384700  |
| C | -6.11165700 | -0.94415700 | -1.48300200 |
| H | -6.89549800 | -1.09670900 | -0.73251200 |
| H | -6.55901400 | -1.17798500 | -2.45206400 |
| C | -4.20065500 | -1.47323700 | 0.04926100  |
| C | -4.89361400 | -1.89390100 | 1.34947100  |
| H | -5.82217400 | -1.31632800 | 1.41954000  |
| C | -5.22781300 | -3.38933400 | 1.30823400  |
| H | -5.77176700 | -3.65587300 | 2.21857200  |
| H | -4.29663100 | -3.96989800 | 1.31552300  |
| C | -6.04025400 | -3.75464000 | 0.06630800  |
| H | -6.23754000 | -4.82925000 | 0.05294700  |
| H | -7.01840300 | -3.26280700 | 0.10886300  |
| C | -5.28847400 | -3.35690700 | -1.20439100 |
| H | -4.36638500 | -3.94088000 | -1.26696100 |
| H | -5.87563900 | -3.59741400 | -2.09526400 |
| C | -4.92534600 | -1.86850900 | -1.23639800 |
| H | -4.19823400 | -1.69810400 | -2.04079600 |
| C | 1.46846200  | 1.80526300  | 1.02357800  |
| C | 2.53640800  | 2.73407300  | 0.42167100  |
| C | 2.14012200  | 1.11953100  | 2.02284500  |
| C | 3.52884800  | 1.49959700  | 2.03879800  |
| O | 2.40717600  | 3.57845300  | -0.41427600 |
| N | 3.74690300  | 2.43652200  | 1.08284600  |
| C | 1.65933000  | 0.17334800  | 2.96969800  |
| C | 4.42173600  | 0.94094700  | 2.95352200  |
| C | 2.53656100  | -0.35780000 | 3.87300100  |
| C | 3.90718800  | 0.02325300  | 3.84733500  |
| H | 4.58068600  | -0.42326300 | 4.57183600  |

|   |            |             |             |
|---|------------|-------------|-------------|
| H | 5.47081500 | 1.20888500  | 2.95578600  |
| H | 2.20289400 | -1.06914400 | 4.61835100  |
| H | 0.60837400 | -0.09813300 | 2.95379700  |
| H | 4.63231800 | 2.87826800  | 0.86631400  |
| C | 3.43966600 | 0.30325800  | -1.07273400 |
| C | 4.14417600 | -0.56772000 | -0.12090700 |
| C | 5.54254200 | -0.51135900 | 0.01054500  |
| C | 3.44978600 | -1.46981800 | 0.70032000  |
| C | 6.20582800 | -1.32872100 | 0.91252900  |
| H | 6.12147500 | 0.15416900  | -0.61860800 |
| C | 4.11843900 | -2.28526400 | 1.59375000  |
| H | 2.37229300 | -1.55131500 | 0.62930500  |
| C | 5.50905500 | -2.23458500 | 1.71673500  |
| H | 3.55554400 | -2.98337100 | 2.20883100  |
| C | 4.26110400 | 1.17001100  | -1.99021800 |
| H | 3.62125900 | 1.73680800  | -2.66686500 |
| H | 4.89497200 | 1.86276900  | -1.43019700 |
| F | 5.09975900 | 0.36973200  | -2.75390500 |
| C | 2.09831700 | 0.37068600  | -1.14838300 |
| H | 1.45521700 | -0.25629100 | -0.54470900 |
| H | 1.59240200 | 1.02497100  | -1.85329400 |
| H | 7.28802200 | -1.27544400 | 0.98567700  |
| C | 6.23532800 | -3.20653000 | 2.60511500  |
| H | 5.63678800 | -3.42140600 | 3.49696100  |
| H | 7.17961300 | -2.77370300 | 2.94965500  |
| C | 6.51877400 | -4.51946400 | 1.86012000  |
| C | 7.23249900 | -5.55444500 | 2.72430700  |
| H | 7.11964900 | -4.29957900 | 0.96984800  |
| H | 5.57003500 | -4.93031900 | 1.49291800  |
| C | 7.51403200 | -6.84609900 | 1.96237400  |
| H | 8.17252200 | -5.13206000 | 3.09521400  |
| H | 6.62385200 | -5.77169600 | 3.60901200  |
| H | 8.02025000 | -7.58029500 | 2.59088500  |
| H | 6.58690900 | -7.30023800 | 1.60257900  |
| H | 8.14978900 | -6.65799900 | 1.09357500  |
| F | 6.32989400 | 3.20424800  | -0.02727900 |
| C | 6.56798100 | 4.09231400  | -1.04232800 |
| C | 7.87733300 | 4.30889600  | -1.42026200 |
| C | 5.48666700 | 4.71022000  | -1.63923800 |
| C | 8.11272500 | 5.20183900  | -2.46054400 |
| H | 8.68078200 | 3.79206800  | -0.90995700 |
| C | 5.74472100 | 5.59909800  | -2.67898900 |
| H | 4.47560000 | 4.50754300  | -1.30106700 |
| C | 7.05067300 | 5.84433700  | -3.08942700 |
| H | 9.13064400 | 5.39293300  | -2.77854600 |
| H | 4.91683100 | 6.09932200  | -3.16712600 |
| H | 7.24181900 | 6.53804900  | -3.89900500 |

(25) TS<sub>2-3i</sub>-PhF

|                                               |             |             |                             |
|-----------------------------------------------|-------------|-------------|-----------------------------|
| Zero-point correction =                       |             |             | 1.180210 (Hartree/Particle) |
| Thermal correction to Energy =                |             |             | 1.255205                    |
| Thermal correction to Enthalpy =              |             |             | 1.256149                    |
| Thermal correction to Gibbs Free Energy =     |             |             | 1.061062                    |
| Sum of electronic and zero-point Energies =   |             |             | -4636.469464                |
| Sum of electronic and thermal Energies =      |             |             | -4636.394469                |
| Sum of electronic and thermal Enthalpies =    |             |             | -4636.393525                |
| Sum of electronic and thermal Free Energies = |             |             | -4636.588612                |
| Au                                            | 0.26818300  | -1.86675300 | 0.51254200                  |
| Au                                            | 1.16992300  | 1.40975600  | -1.91528900                 |
| P                                             | 2.39177700  | -3.03654900 | 0.11546300                  |
| P                                             | 1.42991500  | 3.38010100  | -0.60446500                 |
| Cl                                            | 0.67803000  | -0.68962500 | -2.98764700                 |
| O                                             | 3.55759800  | 1.68940300  | 0.44992400                  |
| O                                             | 4.16611800  | -0.58710400 | 0.41161000                  |
| C                                             | 3.21138000  | -3.53027200 | 1.73821800                  |
| C                                             | 4.56401000  | -3.90443100 | 1.78798800                  |
| H                                             | 5.16933000  | -3.88563700 | 0.89028300                  |
| C                                             | 5.13586700  | -4.30474500 | 3.00178400                  |
| H                                             | 6.18004400  | -4.59430400 | 3.03237400                  |
| C                                             | 4.36238700  | -4.33663700 | 4.16943400                  |
| H                                             | 4.80781000  | -4.65101300 | 5.10650100                  |
| C                                             | 3.01265700  | -3.96644900 | 4.12014100                  |
| H                                             | 2.40855200  | -3.99194300 | 5.02152900                  |
| C                                             | 2.43812200  | -3.56249900 | 2.90931300                  |
| H                                             | 1.39269500  | -3.27544600 | 2.87604400                  |
| C                                             | 1.80858000  | -4.65672800 | -0.65278600                 |
| C                                             | 2.28351300  | -5.90218100 | -0.21418800                 |
| H                                             | 3.01131300  | -5.96128800 | 0.58550400                  |
| C                                             | 1.81038600  | -7.07769000 | -0.81252100                 |
| H                                             | 2.17612100  | -8.03785800 | -0.46833400                 |
| C                                             | 0.87253800  | -7.01121900 | -1.84729700                 |
| H                                             | 0.50669200  | -7.92302700 | -2.30896800                 |
| C                                             | 0.39939900  | -5.76783800 | -2.28707900                 |
| H                                             | -0.32784200 | -5.71194000 | -3.09005900                 |
| C                                             | 0.86067200  | -4.58860900 | -1.68969000                 |
| H                                             | 0.48794500  | -3.62966200 | -2.03177200                 |
| C                                             | -0.09184400 | 4.47753400  | -0.67139300                 |
| C                                             | -1.22769900 | 4.01742200  | -1.35375900                 |
| H                                             | -1.22480100 | 3.05153000  | -1.84624400                 |
| C                                             | -2.37685000 | 4.81461000  | -1.42375500                 |
| H                                             | -3.24421800 | 4.43626200  | -1.95017900                 |
| C                                             | -2.38956500 | 6.07769200  | -0.82308100                 |
| H                                             | -3.27636100 | 6.70057600  | -0.88380800                 |
| C                                             | -1.25117200 | 6.54646200  | -0.15316500                 |
| H                                             | -1.25344600 | 7.53178300  | 0.30161600                  |
| C                                             | -0.10237800 | 5.75131000  | -0.07629500                 |
| H                                             | 0.78001900  | 6.13059400  | 0.42790500                  |

|   |             |             |             |
|---|-------------|-------------|-------------|
| C | 2.87062100  | 4.51195500  | -0.99831500 |
| C | 3.48810900  | 5.27574400  | 0.00252500  |
| H | 3.17912900  | 5.17740700  | 1.03824700  |
| C | 4.51755700  | 6.16429700  | -0.33610100 |
| H | 4.99180800  | 6.75879700  | 0.43799400  |
| C | 4.93007600  | 6.28709300  | -1.66856900 |
| H | 5.72476600  | 6.97829400  | -1.92876200 |
| C | 4.31522800  | 5.51825800  | -2.66480600 |
| H | 4.63656100  | 5.60886000  | -3.69753200 |
| C | 3.28688600  | 4.62993100  | -2.33256600 |
| H | 2.81549600  | 4.03168500  | -3.10526500 |
| C | 3.82968900  | -2.51813700 | -0.97343300 |
| C | 4.59366800  | -1.38051000 | -0.66042700 |
| C | 5.79138700  | -1.10320500 | -1.33774400 |
| C | 6.16670900  | -1.92487400 | -2.40761800 |
| H | 7.08103900  | -1.69992100 | -2.94838400 |
| C | 5.38672800  | -3.02244000 | -2.77562500 |
| H | 5.67789600  | -3.64718700 | -3.61126400 |
| C | 4.23287900  | -3.32660800 | -2.04747500 |
| H | 3.64620300  | -4.19685500 | -2.31116300 |
| C | 1.62706700  | 2.84968100  | 1.18537600  |
| C | 2.68726000  | 1.97818000  | 1.49732200  |
| C | 2.87092400  | 1.46291100  | 2.79016800  |
| C | 1.95793900  | 1.84840800  | 3.78225700  |
| H | 2.09763600  | 1.47697300  | 4.79365600  |
| C | 0.89254600  | 2.70951100  | 3.49537200  |
| H | 0.20634900  | 3.00681300  | 4.27939300  |
| C | 0.72532200  | 3.20924400  | 2.19669600  |
| H | -0.09514600 | 3.88038500  | 1.97265800  |
| C | 4.03162600  | 0.52756700  | 3.04398900  |
| H | 3.70486300  | -0.51172600 | 2.91802700  |
| H | 4.38193100  | 0.63352600  | 4.07807600  |
| C | 6.61133700  | 0.07319000  | -0.87517700 |
| H | 7.25852300  | -0.21764300 | -0.03333900 |
| H | 7.27511300  | 0.41370400  | -1.67523200 |
| C | 4.68621100  | 0.77936300  | 0.62127300  |
| C | 5.20460000  | 0.80645700  | 2.07482300  |
| H | 5.92009800  | -0.02056700 | 2.15748500  |
| C | 5.94569000  | 2.12293400  | 2.39566400  |
| H | 6.37821200  | 2.04238800  | 3.40115700  |
| H | 5.22981500  | 2.95580300  | 2.42769400  |
| C | 7.03771900  | 2.43139200  | 1.35731600  |
| H | 7.53427500  | 3.37733500  | 1.60454500  |
| H | 7.81628100  | 1.65491500  | 1.39883900  |
| C | 6.43078000  | 2.51292800  | -0.05269700 |
| H | 5.73516000  | 3.35890000  | -0.09330900 |
| H | 7.21155800  | 2.71432800  | -0.79871100 |
| C | 5.67797200  | 1.22832200  | -0.46925400 |

|   |             |             |             |
|---|-------------|-------------|-------------|
| H | 5.05736400  | 1.46429300  | -1.34516700 |
| C | -1.65798100 | -1.49876200 | 1.04412900  |
| C | -2.81598900 | -2.05185600 | 0.19119600  |
| C | -2.22657100 | -1.35048900 | 2.34674100  |
| C | -3.60459000 | -1.75863300 | 2.31894500  |
| O | -2.78646600 | -2.39962800 | -0.99899700 |
| N | -3.92900300 | -2.15314100 | 1.02754400  |
| C | -1.64974900 | -0.93242200 | 3.56699900  |
| C | -4.38726200 | -1.76485300 | 3.47117500  |
| C | -2.43182500 | -0.92865700 | 4.71700700  |
| C | -3.78456600 | -1.34766700 | 4.66203500  |
| H | -4.37105100 | -1.34828800 | 5.57534400  |
| H | -5.42096600 | -2.08870000 | 3.45161500  |
| H | -2.01157300 | -0.61637500 | 5.66487000  |
| H | -0.61189900 | -0.61622000 | 3.59099000  |
| H | -4.82825000 | -2.50710600 | 0.71172800  |
| F | -6.42978000 | -3.17914300 | 0.04284500  |
| C | -6.75488500 | -3.72975100 | -1.22480600 |
| C | -5.77233000 | -3.76956200 | -2.20252000 |
| C | -8.05029100 | -4.19432500 | -1.40505600 |
| C | -6.12191300 | -4.31535800 | -3.44554100 |
| H | -4.77178000 | -3.39540000 | -2.00445100 |
| C | -8.37936800 | -4.73676600 | -2.65460600 |
| H | -8.77062100 | -4.13607800 | -0.59853000 |
| C | -7.41800300 | -4.79547500 | -3.67212400 |
| H | -5.37747400 | -4.36168400 | -4.23285700 |
| H | -9.38282300 | -5.10913600 | -2.82851900 |
| H | -7.67846100 | -5.21422400 | -4.63733500 |
| C | -3.02925600 | 0.90082400  | -0.40687500 |
| C | -4.31686800 | 1.30382700  | 0.15947500  |
| C | -5.45132100 | 1.48739300  | -0.67679200 |
| C | -4.48979300 | 1.53307200  | 1.54753800  |
| C | -6.68044500 | 1.85843900  | -0.14489500 |
| H | -5.35131200 | 1.37650200  | -1.74831900 |
| C | -5.72672700 | 1.89784600  | 2.07108700  |
| H | -3.65075100 | 1.42423700  | 2.22610300  |
| C | -6.84793400 | 2.06624800  | 1.23864800  |
| H | -5.82663300 | 2.06637300  | 3.13882000  |
| C | -2.95134200 | 0.55158500  | -1.87596500 |
| H | -1.95866800 | 0.21250500  | -2.17043000 |
| H | -3.69439600 | -0.19229900 | -2.17157600 |
| F | -3.24130100 | 1.76114800  | -2.64755900 |
| C | -1.85786600 | 0.84371600  | 0.31084000  |
| H | -1.77992100 | 1.18183700  | 1.33418300  |
| H | -0.91964300 | 0.69727700  | -0.21018300 |
| H | -7.52767400 | 1.99966400  | -0.81086300 |
| C | -8.19208600 | 2.45490100  | 1.80400000  |
| H | -8.11964600 | 2.74741800  | 2.85530900  |

|   |              |            |             |
|---|--------------|------------|-------------|
| H | -8.90209700  | 1.61896400 | 1.73995900  |
| C | -8.81224100  | 3.62689700 | 1.02078000  |
| C | -10.11536800 | 4.04887800 | 1.64950400  |
| H | -8.97237200  | 3.30018000 | -0.03519000 |
| H | -8.08420000  | 4.47387800 | 1.01770600  |
| C | -10.74997900 | 5.19603300 | 0.90603900  |
| H | -10.82214600 | 3.17717400 | 1.66635900  |
| H | -9.93654700  | 4.34765500 | 2.71647600  |
| H | -11.71230700 | 5.48971100 | 1.39023800  |
| H | -10.07245800 | 6.08396900 | 0.90008700  |
| H | -10.96052500 | 4.91021400 | -0.15296100 |

## (26) IM<sub>3i</sub>-PhF

|                                               |             |             |                             |
|-----------------------------------------------|-------------|-------------|-----------------------------|
| Zero-point correction =                       |             |             | 1.193427 (Hartree/Particle) |
| Thermal correction to Energy =                |             |             | 1.268851                    |
| Thermal correction to Enthalpy =              |             |             | 1.269795                    |
| Thermal correction to Gibbs Free Energy =     |             |             | 1.072891                    |
| Sum of electronic and zero-point Energies =   |             |             | -4636.534613                |
| Sum of electronic and thermal Energies =      |             |             | -4636.459189                |
| Sum of electronic and thermal Enthalpies =    |             |             | -4636.458245                |
| Sum of electronic and thermal Free Energies = |             |             | -4636.655149                |
| Au                                            | 1.63042700  | -0.40713300 | -0.03699500                 |
| Au                                            | -0.94318600 | 0.75614500  | -2.07175800                 |
| P                                             | 3.31151200  | 1.07575100  | 0.58911900                  |
| P                                             | -2.91541600 | 1.21476800  | -0.99769200                 |
| Cl                                            | 1.21698100  | -0.01204700 | -2.83712800                 |
| O                                             | -1.00597800 | 2.93785000  | 0.13006800                  |
| O                                             | 1.24786700  | 3.05343400  | 0.30298900                  |
| C                                             | 3.19034600  | 1.64593100  | 2.31661900                  |
| C                                             | 3.60922500  | 2.92215900  | 2.70132700                  |
| H                                             | 4.02451500  | 3.60852900  | 1.97178300                  |
| C                                             | 3.47781200  | 3.31760200  | 4.03000400                  |
| H                                             | 3.80498500  | 4.30517200  | 4.32975800                  |
| C                                             | 2.93734000  | 2.44550200  | 4.97330400                  |
| H                                             | 2.83876000  | 2.75686600  | 6.00194400                  |
| C                                             | 2.52692200  | 1.17147800  | 4.58509200                  |
| H                                             | 2.11068900  | 0.48688100  | 5.31623500                  |
| C                                             | 2.65502700  | 0.77227100  | 3.25844900                  |
| H                                             | 2.32466400  | -0.21819300 | 2.95822000                  |
| C                                             | 4.92290100  | 0.24510200  | 0.43256700                  |
| C                                             | 5.97661000  | 0.54383300  | 1.29833300                  |
| H                                             | 5.83996000  | 1.25385400  | 2.10986500                  |
| C                                             | 7.20640300  | -0.09108200 | 1.13521300                  |
| H                                             | 8.02431700  | 0.13298200  | 1.80868300                  |
| C                                             | 7.38178200  | -1.00965800 | 0.10432500                  |
| H                                             | 8.34024400  | -1.50197400 | -0.02234900                 |
| C                                             | 6.33332800  | -1.30234800 | -0.76137100                 |
| H                                             | 6.47181000  | -2.01897100 | -1.56566100                 |



|   |             |             |             |
|---|-------------|-------------|-------------|
| C | 5.10411700  | -0.67907600 | -0.59850500 |
| H | 4.28244700  | -0.91621100 | -1.27368900 |
| C | -4.19021900 | -0.05680900 | -1.19427500 |
| C | -3.91075600 | -1.20342900 | -1.93516700 |
| H | -2.94979700 | -1.32351700 | -2.42540800 |
| C | -4.86106100 | -2.21373500 | -2.05431500 |
| H | -4.61865300 | -3.10329900 | -2.61939800 |
| C | -6.09404400 | -2.07258500 | -1.43024400 |
| H | -6.83552300 | -2.85847300 | -1.52210100 |
| C | -6.39332500 | -0.91938000 | -0.70596400 |
| H | -7.36612300 | -0.80581200 | -0.24151300 |
| C | -5.44692700 | 0.09341300  | -0.58949100 |
| H | -5.69218600 | 0.99596300  | -0.03906200 |
| C | -3.68557200 | 2.83043700  | -1.34487600 |
| C | -4.36614300 | 3.53218800  | -0.34104800 |
| H | -4.42108800 | 3.13042800  | 0.66335500  |
| C | -4.95653800 | 4.75479300  | -0.63031400 |
| H | -5.47927500 | 5.29584600  | 0.14503500  |
| C | -4.86622600 | 5.28513100  | -1.91666200 |
| H | -5.32765300 | 6.24269700  | -2.13925100 |
| C | -4.18921800 | 4.59362700  | -2.91116800 |
| H | -4.11698500 | 5.00830700  | -3.91219400 |
| C | -3.59663600 | 3.36563400  | -2.62754000 |
| H | -3.05775700 | 2.82834000  | -3.40543600 |
| C | 3.44900900  | 2.59990500  | -0.38293800 |
| C | 2.35048700  | 3.46998300  | -0.39041900 |
| C | 2.43156700  | 4.70443400  | -1.02934300 |
| C | 3.60402400  | 5.02879000  | -1.70783500 |
| H | 3.66334100  | 5.97929300  | -2.22477300 |
| C | 4.68976800  | 4.16186000  | -1.73534900 |
| H | 5.58951500  | 4.42779900  | -2.27872200 |
| C | 4.61371900  | 2.94468800  | -1.06396900 |
| H | 5.45917600  | 2.26736300  | -1.06750700 |
| C | -2.52417100 | 1.29364600  | 0.78697800  |
| C | -1.51395800 | 2.19751200  | 1.15441200  |
| C | -1.11998100 | 2.36316800  | 2.47928200  |
| C | -1.77689900 | 1.60481500  | 3.44643600  |
| H | -1.50253800 | 1.74456900  | 4.48661700  |
| C | -2.78851400 | 0.71023900  | 3.10877700  |
| H | -3.29113500 | 0.14354100  | 3.88423700  |
| C | -3.16531200 | 0.55352500  | 1.77698500  |
| H | -3.94540300 | -0.15227800 | 1.51276700  |
| C | -0.05803300 | 3.38574300  | 2.79014600  |
| H | 0.91717800  | 2.89589500  | 2.82582500  |
| H | -0.23902700 | 3.82005000  | 3.77983100  |
| C | 1.24411000  | 5.62790500  | -0.97805100 |
| H | 1.36328000  | 6.33721100  | -0.14801700 |
| H | 1.19391400  | 6.22489100  | -1.88887400 |

|   |             |             |             |
|---|-------------|-------------|-------------|
| C | 0.05938800  | 3.84539800  | 0.33956700  |
| C | -0.05120900 | 4.49115600  | 1.72676000  |
| H | 0.84645000  | 5.10527100  | 1.86379100  |
| C | -1.29864500 | 5.38206000  | 1.80863700  |
| H | -1.30777900 | 5.88354900  | 2.77772800  |
| H | -2.19592800 | 4.75204200  | 1.76833000  |
| C | -1.35869100 | 6.40278800  | 0.67321700  |
| H | -2.28574100 | 6.97520500  | 0.73834800  |
| H | -0.54485600 | 7.12808700  | 0.78216700  |
| C | -1.28867100 | 5.70566400  | -0.68801700 |
| H | -2.17630500 | 5.08317600  | -0.81609100 |
| H | -1.29228000 | 6.44061000  | -1.49759200 |
| C | -0.04268000 | 4.82414400  | -0.83097400 |
| H | -0.14896600 | 4.19352500  | -1.72391700 |
| C | 0.31674900  | -2.52165800 | 0.10776000  |
| C | 1.39711500  | -3.46493100 | -0.28161100 |
| C | 0.48420100  | -2.28240600 | 1.49643700  |
| C | 1.62918100  | -3.04055200 | 1.93865900  |
| O | 1.59874700  | -3.96591400 | -1.36792000 |
| N | 2.15689400  | -3.70035600 | 0.86578400  |
| C | -0.24900900 | -1.52053500 | 2.44173500  |
| C | 2.01330400  | -3.04729200 | 3.27158000  |
| C | 0.13144100  | -1.55604000 | 3.76028500  |
| C | 1.24837100  | -2.32303200 | 4.17504200  |
| H | 1.51748800  | -2.34141800 | 5.22403400  |
| H | 2.87013600  | -3.62857600 | 3.60065600  |
| H | -0.42396800 | -0.98397100 | 4.49353400  |
| H | -1.07684100 | -0.90196800 | 2.11396000  |
| H | 2.99673400  | -4.26244700 | 0.87016400  |
| F | 4.87706200  | -4.73684000 | 0.77431900  |
| C | 5.62894100  | -4.64134300 | -0.35781000 |
| C | 4.98011800  | -4.52578600 | -1.57497400 |
| C | 7.00427800  | -4.66805600 | -0.22696500 |
| C | 5.76964400  | -4.43647800 | -2.72129500 |
| H | 3.89590400  | -4.51900000 | -1.62964600 |
| C | 7.77014900  | -4.57320900 | -1.38365100 |
| H | 7.44603200  | -4.76375000 | 0.75802700  |
| C | 7.15860700  | -4.45685800 | -2.62930100 |
| H | 5.28668200  | -4.35147100 | -3.69061200 |
| H | 8.85104800  | -4.60630000 | -1.30856300 |
| H | 7.75959900  | -4.39470300 | -3.52783500 |
| C | -1.73781400 | -3.59575200 | -0.91769000 |
| C | -2.87817400 | -3.86389100 | -0.10090000 |
| C | -3.77396600 | -4.91709100 | -0.42270100 |
| C | -3.21988600 | -3.05682500 | 1.00588900  |
| C | -4.92702000 | -5.12315900 | 0.31025900  |
| H | -3.57212200 | -5.55029700 | -1.27428000 |
| C | -4.38373800 | -3.26844300 | 1.72296800  |

|   |              |             |             |
|---|--------------|-------------|-------------|
| H | -2.56432000  | -2.25304600 | 1.31703100  |
| C | -5.26392500  | -4.30497300 | 1.39224500  |
| H | -4.61582600  | -2.63001100 | 2.57229500  |
| C | -1.48223500  | -4.42407900 | -2.13726000 |
| H | -0.54280800  | -4.15628800 | -2.61516400 |
| H | -1.48201100  | -5.49057900 | -1.92173200 |
| F | -2.50700700  | -4.19397000 | -3.07438700 |
| C | -0.90171500  | -2.34551600 | -0.75029300 |
| H | -1.50948400  | -1.53164200 | -0.34963700 |
| H | -0.56615600  | -2.04057500 | -1.74690000 |
| H | -5.59266800  | -5.93385900 | 0.02949600  |
| C | -6.55589500  | -4.47068000 | 2.14537900  |
| H | -6.37251800  | -4.36913900 | 3.22064500  |
| H | -6.95701800  | -5.47614600 | 1.98830400  |
| C | -7.59735400  | -3.42934900 | 1.72027200  |
| C | -8.90171700  | -3.52373200 | 2.50603100  |
| H | -7.80281800  | -3.55351400 | 0.65029100  |
| H | -7.17052900  | -2.42695900 | 1.83205700  |
| C | -9.91335900  | -2.47237500 | 2.05906700  |
| H | -9.33076700  | -4.52432300 | 2.38301200  |
| H | -8.69120200  | -3.40441500 | 3.57436800  |
| H | -10.84218100 | -2.53742500 | 2.62799200  |
| H | -9.51845600  | -1.46317400 | 2.19755700  |
| H | -10.16869300 | -2.58860800 | 1.00177700  |

### The calculated structures using B3LYP/6-31G

#### (27) IM<sub>2</sub>

|                                               |             |             |                             |
|-----------------------------------------------|-------------|-------------|-----------------------------|
| Zero-point correction =                       |             |             | 1.097763 (Hartree/Particle) |
| Thermal correction to Energy =                |             |             | 1.168432                    |
| Thermal correction to Enthalpy =              |             |             | 1.169376                    |
| Thermal correction to Gibbs Free Energy =     |             |             | 0.972083                    |
| Sum of electronic and zero-point Energies =   |             |             | -4305.207477                |
| Sum of electronic and thermal Energies =      |             |             | -4305.136808                |
| Sum of electronic and thermal Enthalpies =    |             |             | -4305.135864                |
| Sum of electronic and thermal Free Energies = |             |             | -4305.333157                |
| Au                                            | -0.36937200 | -1.09945300 | -0.24659300                 |
| Au                                            | 1.41074900  | 1.51537600  | -1.69074200                 |
| P                                             | 1.14457000  | -3.03633300 | -0.32899800                 |
| P                                             | 1.85598700  | 3.07033700  | 0.06100600                  |
| Cl                                            | 0.87271400  | -0.05003900 | -3.46244100                 |
| O                                             | 3.55743000  | 0.87768400  | 0.94877700                  |
| O                                             | 3.50432600  | -1.41484300 | 0.52635300                  |
| C                                             | 1.35389600  | -3.82949200 | 1.36056100                  |
| C                                             | 2.32754900  | -4.81794000 | 1.57668700                  |
| H                                             | 2.99263900  | -5.11437900 | 0.77223400                  |

|   |             |             |             |
|---|-------------|-------------|-------------|
| C | 2.44606500  | -5.41927800 | 2.83512800  |
| H | 3.19854600  | -6.18409900 | 2.99679700  |
| C | 1.59637000  | -5.03679300 | 3.88062700  |
| H | 1.68869800  | -5.50653000 | 4.85430000  |
| C | 0.62930900  | -4.04725600 | 3.66814700  |
| H | -0.02822900 | -3.74469900 | 4.47651400  |
| C | 0.50706700  | -3.44103700 | 2.41140800  |
| H | -0.23389100 | -2.66203800 | 2.25667000  |
| C | 0.17357800  | -4.27678800 | -1.36331900 |
| C | -0.13157000 | -5.56435300 | -0.89953700 |
| H | 0.20968600  | -5.89280900 | 0.07558000  |
| C | -0.88450400 | -6.43373500 | -1.70064600 |
| H | -1.12100700 | -7.42818800 | -1.33689800 |
| C | -1.32644200 | -6.02334000 | -2.96293400 |
| H | -1.90659800 | -6.69995300 | -3.58155900 |
| C | -1.01956400 | -4.73718900 | -3.42711500 |
| H | -1.35682600 | -4.41618400 | -4.40716100 |
| C | -0.27709700 | -3.85924600 | -2.63003300 |
| H | -0.04405900 | -2.86151200 | -2.99267500 |
| C | 0.58518800  | 4.45288800  | 0.13946700  |
| C | -0.65646700 | 4.27811800  | -0.49082200 |
| H | -0.86089600 | 3.36178200  | -1.03483900 |
| C | -1.61896700 | 5.29324600  | -0.43636600 |
| H | -2.57450300 | 5.15435300  | -0.93107700 |
| C | -1.34402300 | 6.48584300  | 0.24216400  |
| H | -2.08752900 | 7.27510100  | 0.27842700  |
| C | -0.10275900 | 6.66490300  | 0.86505500  |
| H | 0.11798400  | 7.59219200  | 1.38301800  |
| C | 0.86241700  | 5.65303300  | 0.81417400  |
| H | 1.82706600  | 5.80777400  | 1.28492000  |
| C | 3.51074800  | 3.94214600  | -0.05841500 |
| C | 4.20465800  | 4.34062500  | 1.09397300  |
| H | 3.81332300  | 4.10381100  | 2.07824800  |
| C | 5.41359700  | 5.03716100  | 0.97178500  |
| H | 5.94882300  | 5.34660500  | 1.86354800  |
| C | 5.92916100  | 5.33350500  | -0.29592300 |
| H | 6.86557600  | 5.87352200  | -0.38796900 |
| C | 5.23744600  | 4.93042800  | -1.44466200 |
| H | 5.63615900  | 5.15445200  | -2.42832000 |
| C | 4.02908200  | 4.23380200  | -1.32889900 |
| H | 3.49855700  | 3.91454700  | -2.22081800 |
| C | 2.85736300  | -3.05337000 | -1.08775000 |
| C | 3.85988300  | -2.22433400 | -0.55839500 |
| C | 5.17081800  | -2.25552800 | -1.05692500 |
| C | 5.46021900  | -3.11386700 | -2.12476500 |
| H | 6.46892300  | -3.13172500 | -2.52634400 |
| C | 4.47431500  | -3.93817800 | -2.67191100 |
| H | 4.70952500  | -4.59772200 | -3.49936800 |

|   |             |             |             |
|---|-------------|-------------|-------------|
| C | 3.17738600  | -3.91093600 | -2.14957700 |
| H | 2.41478000  | -4.55219200 | -2.57315600 |
| C | 1.78503200  | 2.23977300  | 1.73682000  |
| C | 2.63714800  | 1.14622800  | 1.96534300  |
| C | 2.58662900  | 0.40073600  | 3.15102300  |
| C | 1.65636900  | 0.78904600  | 4.12624500  |
| H | 1.60868700  | 0.22895900  | 5.05555400  |
| C | 0.80059200  | 1.87587800  | 3.92265600  |
| H | 0.08595200  | 2.15937900  | 4.68742900  |
| C | 0.86190300  | 2.60085800  | 2.72623800  |
| H | 0.19413500  | 3.43896200  | 2.56489000  |
| C | 3.50678200  | -0.78916500 | 3.31946700  |
| H | 2.97083600  | -1.70458900 | 3.04104600  |
| H | 3.79795400  | -0.89429400 | 4.37130000  |
| C | 6.20016900  | -1.34797400 | -0.42894500 |
| H | 6.69291300  | -1.85218100 | 0.41497400  |
| H | 6.98872200  | -1.11581900 | -1.15306900 |
| C | 4.37648800  | -0.32176000 | 0.99586200  |
| C | 4.77540000  | -0.65930900 | 2.44705200  |
| H | 5.27190300  | -1.63702400 | 2.41430000  |
| C | 5.77781800  | 0.37726400  | 3.00410700  |
| H | 6.09850200  | 0.04958400  | 4.00088900  |
| H | 5.27291800  | 1.34384500  | 3.13704100  |
| C | 6.99375200  | 0.55750300  | 2.07779200  |
| H | 7.66467100  | 1.32326600  | 2.48541100  |
| H | 7.57489800  | -0.37508300 | 2.04536500  |
| C | 6.54566700  | 0.96368600  | 0.66140200  |
| H | 6.07682600  | 1.95339200  | 0.70436200  |
| H | 7.41213400  | 1.05162900  | -0.00587500 |
| C | 5.54257000  | -0.03296600 | 0.03398500  |
| H | 5.08980400  | 0.43939500  | -0.84753900 |
| C | -1.99154300 | 0.07138900  | -0.10054500 |
| C | -2.74283500 | 0.27355200  | 1.22351000  |
| C | -2.72584300 | 0.81864700  | -1.03832900 |
| C | -3.84959500 | 1.45514700  | -0.38115500 |
| O | -2.45778300 | -0.20098300 | 2.33431900  |
| N | -3.82169200 | 1.12197400  | 0.96400300  |
| C | -2.51827600 | 1.01857100  | -2.43238300 |
| C | -4.73868000 | 2.25968400  | -1.08397800 |
| C | -3.40926500 | 1.82260000  | -3.12775700 |
| C | -4.50152200 | 2.42812400  | -2.45722900 |
| H | -5.18479000 | 3.04886700  | -3.02843200 |
| H | -5.58757200 | 2.72913200  | -0.60211200 |
| H | -3.27484000 | 1.99438100  | -4.18880300 |
| H | -1.66573000 | 0.55528000  | -2.92072100 |
| H | -4.49353000 | 1.40426400  | 1.66867600  |
| C | -4.54586600 | -2.47456100 | 0.56036900  |
| C | -3.73025300 | -2.58303600 | -0.51890400 |

|   |              |             |             |
|---|--------------|-------------|-------------|
| H | -2.81170500  | -3.15690300 | -0.47362900 |
| H | -3.96439700  | -2.14893700 | -1.48329000 |
| C | -5.84470500  | -1.76555900 | 0.54341300  |
| C | -6.55139000  | -1.50528300 | 1.73998400  |
| C | -6.42578800  | -1.31499700 | -0.66531700 |
| C | -7.75232200  | -0.79650800 | 1.72632800  |
| H | -6.18032000  | -1.88843600 | 2.68109700  |
| C | -7.62862300  | -0.61249900 | -0.67170700 |
| H | -5.94990500  | -1.53919400 | -1.61342700 |
| C | -8.31345500  | -0.32847100 | 0.52479400  |
| H | -8.05567600  | -0.29373000 | -1.61848300 |
| C | -4.04350300  | -3.04268500 | 1.86521700  |
| H | -3.15418600  | -3.65567900 | 1.70664100  |
| H | -3.80932600  | -2.24620800 | 2.58045500  |
| F | -5.03664800  | -3.88352000 | 2.49680100  |
| H | -8.27121300  | -0.61511900 | 2.66279200  |
| C | -9.59493600  | 0.47549600  | 0.52162400  |
| C | -9.35057300  | 2.00077800  | 0.65280500  |
| H | -10.23824200 | 0.14963800  | 1.34930300  |
| H | -10.15165300 | 0.28459300  | -0.40539800 |
| C | -10.65419200 | 2.81881200  | 0.66560600  |
| H | -8.78405600  | 2.19625100  | 1.57539700  |
| H | -8.71518200  | 2.33597700  | -0.18152400 |
| C | -10.41117700 | 4.33108000  | 0.79226100  |
| H | -11.22041600 | 2.61234500  | -0.25421100 |
| H | -11.28546200 | 2.47697300  | 1.49833800  |
| H | -11.35580900 | 4.88580300  | 0.79986200  |
| H | -9.87641000  | 4.56906800  | 1.72030500  |
| H | -9.81075500  | 4.70709100  | -0.04600400 |

**(28) TS<sub>2-3</sub>**

|                                               |             |             |                             |
|-----------------------------------------------|-------------|-------------|-----------------------------|
| Zero-point correction =                       |             |             | 1.098947 (Hartree/Particle) |
| Thermal correction to Energy =                |             |             | 1.168025                    |
| Thermal correction to Enthalpy =              |             |             | 1.168970                    |
| Thermal correction to Gibbs Free Energy =     |             |             | 0.980864                    |
| Sum of electronic and zero-point Energies =   |             |             | -4305.205435                |
| Sum of electronic and thermal Energies =      |             |             | -4305.136357                |
| Sum of electronic and thermal Enthalpies =    |             |             | -4305.135412                |
| Sum of electronic and thermal Free Energies = |             |             | -4305.323518                |
| Au                                            | -0.49845000 | -1.19449800 | 0.27434900                  |
| Au                                            | 0.98206500  | 1.42379800  | -1.58387100                 |
| P                                             | 0.97911500  | -3.07901900 | -0.27913700                 |
| P                                             | 2.03458300  | 2.92481200  | -0.05659800                 |
| Cl                                            | -0.12356900 | -0.10185200 | -3.11282000                 |
| O                                             | 3.82705700  | 0.66429000  | 0.33670500                  |
| O                                             | 3.58224800  | -1.62291000 | -0.06354100                 |
| C                                             | 1.64170900  | -3.90631800 | 1.27372200                  |
| C                                             | 2.62611900  | -4.90473900 | 1.19640700                  |

|   |             |             |             |
|---|-------------|-------------|-------------|
| H | 3.03741700  | -5.19197500 | 0.23427700  |
| C | 3.08483600  | -5.52711100 | 2.36328300  |
| H | 3.84476200  | -6.29897800 | 2.29804100  |
| C | 2.56511300  | -5.15555200 | 3.60963500  |
| H | 2.92191700  | -5.63998400 | 4.51265300  |
| C | 1.58747200  | -4.15677800 | 3.68858200  |
| H | 1.18608700  | -3.86045200 | 4.65216500  |
| C | 1.12580100  | -3.52962100 | 2.52427100  |
| H | 0.37948000  | -2.74348100 | 2.59435100  |
| C | -0.26344000 | -4.30188400 | -1.00552600 |
| C | -0.42084200 | -5.60113100 | -0.50312300 |
| H | 0.19678700  | -5.95128100 | 0.31611300  |
| C | -1.38314900 | -6.45421300 | -1.06077500 |
| H | -1.50159100 | -7.45856000 | -0.66731600 |
| C | -2.18249400 | -6.01652600 | -2.12213800 |
| H | -2.92256600 | -6.68145800 | -2.55528300 |
| C | -2.02269000 | -4.71925200 | -2.62762600 |
| H | -2.63368000 | -4.37812600 | -3.45715500 |
| C | -1.07149200 | -3.85788800 | -2.06959100 |
| H | -0.95034600 | -2.85243500 | -2.46435900 |
| C | 0.98206900  | 4.42374900  | 0.36720800  |
| C | -0.37518100 | 4.43927800  | 0.01354200  |
| H | -0.81271500 | 3.58878300  | -0.49914500 |
| C | -1.15991300 | 5.56220400  | 0.30548100  |
| H | -2.20608800 | 5.57096200  | 0.02083500  |
| C | -0.59570000 | 6.66768800  | 0.95040700  |
| H | -1.20378800 | 7.53920100  | 1.16956900  |
| C | 0.75938300  | 6.65342600  | 1.30391100  |
| H | 1.20352000  | 7.51155600  | 1.79720500  |
| C | 1.54895100  | 5.53696800  | 1.01099300  |
| H | 2.60201900  | 5.54465000  | 1.26930700  |
| C | 3.64900100  | 3.66142000  | -0.66498200 |
| C | 4.66629400  | 4.02000200  | 0.23192300  |
| H | 4.55827900  | 3.81580500  | 1.29247800  |
| C | 5.83189100  | 4.63180600  | -0.24594300 |
| H | 6.61670000  | 4.91150200  | 0.44936700  |
| C | 5.98435000  | 4.88114900  | -1.61546800 |
| H | 6.88794100  | 5.35584100  | -1.98319500 |
| C | 4.97161500  | 4.51461600  | -2.50992400 |
| H | 5.08815200  | 4.70102200  | -3.57224800 |
| C | 3.80352600  | 3.90473100  | -2.03747300 |
| H | 3.02190500  | 3.61527800  | -2.73331800 |
| C | 2.40630400  | -3.13167000 | -1.49461800 |
| C | 3.56524600  | -2.38239200 | -1.23787600 |
| C | 4.68273200  | -2.45072000 | -2.08342700 |
| C | 4.61010300  | -3.25803700 | -3.22471900 |
| H | 5.46484100  | -3.30301500 | -3.89295000 |
| C | 3.46024600  | -3.99974700 | -3.50632000 |

|   |             |             |             |
|---|-------------|-------------|-------------|
| H | 3.41348600  | -4.62095300 | -4.39347800 |
| C | 2.36498900  | -3.94112000 | -2.63884200 |
| H | 1.47790300  | -4.52211700 | -2.85601100 |
| C | 2.38437900  | 2.07892100  | 1.57515300  |
| C | 3.22335700  | 0.95220100  | 1.56384100  |
| C | 3.46126100  | 0.19223000  | 2.71667100  |
| C | 2.83789200  | 0.59839900  | 3.90551800  |
| H | 3.01379100  | 0.02618500  | 4.81153900  |
| C | 2.00102100  | 1.71779400  | 3.94133700  |
| H | 1.52812000  | 2.01333500  | 4.87102200  |
| C | 1.77072300  | 2.45818400  | 2.77545800  |
| H | 1.11740700  | 3.32232800  | 2.80020400  |
| C | 4.34545700  | -1.03298200 | 2.62890900  |
| H | 3.71899600  | -1.92374500 | 2.50083000  |
| H | 4.90236700  | -1.16337000 | 3.56438600  |
| C | 5.89749300  | -1.63028800 | -1.72548800 |
| H | 6.55756100  | -2.19334800 | -1.04944700 |
| H | 6.48562500  | -1.41460400 | -2.62414200 |
| C | 4.58423100  | -0.56361200 | 0.15900200  |
| C | 5.33989900  | -0.94013400 | 1.45023400  |
| H | 5.76481500  | -1.93721500 | 1.28020100  |
| C | 6.50173000  | 0.04132600  | 1.72404200  |
| H | 7.05785200  | -0.31466400 | 2.60031300  |
| H | 6.09771900  | 1.02871000  | 1.98656100  |
| C | 7.43549100  | 0.17498700  | 0.50861700  |
| H | 8.23296100  | 0.89611400  | 0.72498800  |
| H | 7.93276900  | -0.78678000 | 0.31752000  |
| C | 6.64809500  | 0.63140000  | -0.73324100 |
| H | 6.26027100  | 1.64137700  | -0.55916000 |
| H | 7.30836500  | 0.69189300  | -1.60754500 |
| C | 5.46255800  | -0.30016000 | -1.07794400 |
| H | 4.81445000  | 0.21817400  | -1.79641100 |
| C | -2.08933500 | -0.07052300 | 0.94946400  |
| C | -2.21382000 | 0.28373200  | 2.43304900  |
| C | -2.77301500 | 1.00557100  | 0.26674400  |
| C | -3.34686500 | 1.89220000  | 1.23470400  |
| O | -1.72402000 | -0.31249200 | 3.40440700  |
| N | -3.02481400 | 1.42290800  | 2.50855400  |
| C | -2.90554200 | 1.29802500  | -1.10573500 |
| C | -4.06009700 | 3.02711700  | 0.85866900  |
| C | -3.61110000 | 2.44105400  | -1.48645000 |
| C | -4.18904700 | 3.28310300  | -0.51474200 |
| H | -4.74113300 | 4.16110400  | -0.83505800 |
| H | -4.49482200 | 3.69468200  | 1.59386500  |
| H | -3.71242800 | 2.68662900  | -2.53735000 |
| H | -2.43093700 | 0.66097500  | -1.84547400 |
| H | -3.35565300 | 1.79626600  | 3.38491900  |
| C | -4.59802700 | -1.23063100 | 1.74063300  |



|   |              |             |             |
|---|--------------|-------------|-------------|
| C | -3.46821900  | -1.71177900 | 1.05922000  |
| H | -2.79015300  | -2.36472000 | 1.59605300  |
| H | -3.48997000  | -1.87609600 | -0.00942400 |
| C | -5.69262000  | -0.55415300 | 1.07901800  |
| C | -6.77622100  | 0.01185200  | 1.81404900  |
| C | -5.74223000  | -0.44297300 | -0.34019700 |
| C | -7.83026100  | 0.63729800  | 1.16496100  |
| H | -6.76416600  | -0.02447400 | 2.89402300  |
| C | -6.79976000  | 0.19254000  | -0.97661500 |
| H | -4.95840200  | -0.87355300 | -0.94885600 |
| C | -7.86742200  | 0.74613700  | -0.24206400 |
| H | -6.80901900  | 0.25922900  | -2.05985000 |
| C | -4.63707100  | -1.49017100 | 3.22970400  |
| H | -5.40415800  | -2.23299100 | 3.47400900  |
| H | -3.66637000  | -1.82071000 | 3.59880200  |
| F | -4.96866300  | -0.29438400 | 3.98688300  |
| H | -8.64081600  | 1.05996200  | 1.75047100  |
| C | -9.04235700  | 1.38567700  | -0.93937400 |
| H | -9.44200400  | 2.20044200  | -0.32181600 |
| H | -8.71530800  | 1.83051100  | -1.88782000 |
| C | -10.18636800 | 0.37496600  | -1.23012200 |
| C | -11.38581900 | 1.02947900  | -1.93923000 |
| H | -10.51779700 | -0.07714300 | -0.28460900 |
| H | -9.79447000  | -0.44566200 | -1.84755400 |
| C | -12.51948100 | 0.03281500  | -2.22816900 |
| H | -11.76811300 | 1.85291900  | -1.31871100 |
| H | -11.04584300 | 1.48430500  | -2.88093700 |
| H | -13.35852100 | 0.52456200  | -2.73210000 |
| H | -12.17392700 | -0.78368800 | -2.87399200 |
| H | -12.90103700 | -0.41250200 | -1.30121600 |

## (29) IM<sub>2</sub>-PhF

|                                               |             |             |                             |
|-----------------------------------------------|-------------|-------------|-----------------------------|
| Zero-point correction =                       |             |             | 1.192834 (Hartree/Particle) |
| Thermal correction to Energy =                |             |             | 1.270417                    |
| Thermal correction to Enthalpy =              |             |             | 1.271361                    |
| Thermal correction to Gibbs Free Energy =     |             |             | 1.059830                    |
| Sum of electronic and zero-point Energies =   |             |             | -4636.541577                |
| Sum of electronic and thermal Energies =      |             |             | -4636.463994                |
| Sum of electronic and thermal Enthalpies =    |             |             | -4636.463049                |
| Sum of electronic and thermal Free Energies = |             |             | -4636.674581                |
| Au                                            | -0.06072600 | 1.23453100  | -0.24238800                 |
| Au                                            | -1.62105000 | -1.45124800 | -1.84925700                 |
| P                                             | -1.69016700 | 3.07338000  | -0.36888700                 |
| P                                             | -2.01930200 | -3.07495600 | -0.15098200                 |
| Cl                                            | -1.12388500 | 0.20947400  | -3.54214400                 |
| O                                             | -3.89540400 | -1.01348900 | 0.69093800                  |
| O                                             | -3.97753900 | 1.28773700  | 0.32076100                  |
| C                                             | -2.05100300 | 3.80229600  | 1.32451100                  |

|   |             |             |             |
|---|-------------|-------------|-------------|
| C | -3.11306900 | 4.70104200  | 1.51371700  |
| H | -3.75904300 | 4.96533100  | 0.68298700  |
| C | -3.34402000 | 5.25427600  | 2.77864200  |
| H | -4.16521400 | 5.94937000  | 2.91963800  |
| C | -2.51826700 | 4.91336900  | 3.85719100  |
| H | -2.69866100 | 5.34490000  | 4.83625100  |
| C | -1.46129300 | 4.01469700  | 3.67048600  |
| H | -0.82091500 | 3.74469400  | 4.50381100  |
| C | -1.22662800 | 3.45672800  | 2.40750800  |
| H | -0.41433400 | 2.74865400  | 2.27138400  |
| C | -0.75118000 | 4.40951400  | -1.31004300 |
| C | -0.58502900 | 5.70613600  | -0.80341100 |
| H | -1.02015700 | 5.98394100  | 0.14989600  |
| C | 0.15159500  | 6.65027800  | -1.53142000 |
| H | 0.28018400  | 7.65182100  | -1.13432700 |
| C | 0.71617000  | 6.30521100  | -2.76390000 |
| H | 1.28352900  | 7.03961300  | -3.32600000 |
| C | 0.54771600  | 5.01001300  | -3.27163100 |
| H | 0.97852200  | 4.73966200  | -4.23016300 |
| C | -0.17830600 | 4.05846100  | -2.54699100 |
| H | -0.30575600 | 3.05482700  | -2.94395200 |
| C | -0.65582400 | -4.36389800 | -0.04677000 |
| C | 0.59596500  | -4.08138300 | -0.61493200 |
| H | 0.75699100  | -3.13557500 | -1.12172600 |
| C | 1.62575800  | -5.02721500 | -0.54681800 |
| H | 2.58890400  | -4.80526000 | -0.99434400 |
| C | 1.40879000  | -6.25720300 | 0.08445500  |
| H | 2.20469300  | -6.99310700 | 0.13048300  |
| C | 0.15867300  | -6.54293600 | 0.64691500  |
| H | -0.01645500 | -7.49936400 | 1.12805100  |
| C | -0.87397100 | -5.60078400 | 0.58184100  |
| H | -1.84405300 | -5.83798300 | 1.00490700  |
| C | -3.59836200 | -4.06187000 | -0.36132100 |
| C | -4.32215300 | -4.52145700 | 0.74894000  |
| H | -4.00118900 | -4.26935900 | 1.75462000  |
| C | -5.46983300 | -5.30101800 | 0.55625000  |
| H | -6.02838500 | -5.65797600 | 1.41537400  |
| C | -5.89440100 | -5.61913800 | -0.73957700 |
| H | -6.78362700 | -6.22317000 | -0.88591000 |
| C | -5.17288600 | -5.15536700 | -1.84640200 |
| H | -5.50146700 | -5.39620300 | -2.85178600 |
| C | -4.02559900 | -4.37594200 | -1.66018100 |
| H | -3.47174700 | -4.00994100 | -2.51946700 |
| C | -3.35342700 | 2.99414900  | -1.22757400 |
| C | -4.32630500 | 2.09086100  | -0.77021300 |
| C | -5.60684300 | 2.04513400  | -1.34077800 |
| C | -5.89178400 | 2.90127400  | -2.41160100 |
| H | -6.87557700 | 2.86069700  | -2.86944400 |

|   |             |             |             |
|---|-------------|-------------|-------------|
| C | -4.93291900 | 3.79705800  | -2.89065300 |
| H | -5.16414700 | 4.45310700  | -3.72201100 |
| C | -3.66852300 | 3.84636400  | -2.29496500 |
| H | -2.92663700 | 4.54261100  | -2.66522800 |
| C | -2.07975200 | -2.27726800 | 1.54055100  |
| C | -3.01044300 | -1.24514600 | 1.74681000  |
| C | -3.06793500 | -0.52700900 | 2.94876100  |
| C | -2.16569800 | -0.87993800 | 3.96281500  |
| H | -2.20053500 | -0.34121200 | 4.90514300  |
| C | -1.23421100 | -1.90672000 | 3.78189700  |
| H | -0.54727700 | -2.16536200 | 4.57982400  |
| C | -1.18821300 | -2.60533700 | 2.56935500  |
| H | -0.46413700 | -3.39861300 | 2.42601300  |
| C | -4.07364200 | 0.59426800  | 3.09760700  |
| H | -3.58905700 | 1.55188900  | 2.87271000  |
| H | -4.42430200 | 0.64882400  | 4.13515100  |
| C | -6.60770100 | 1.06336000  | -0.78132900 |
| H | -7.17497500 | 1.52061000  | 0.04231700  |
| H | -7.34104100 | 0.79417000  | -1.54937800 |
| C | -4.79530900 | 0.12831900  | 0.72172700  |
| C | -5.28594500 | 0.40448900  | 2.15830100  |
| H | -5.84277800 | 1.34910800  | 2.12048700  |
| C | -6.24495500 | -0.70608300 | 2.64339700  |
| H | -6.63295900 | -0.42333100 | 3.62996200  |
| H | -5.68562700 | -1.64166200 | 2.78061100  |
| C | -7.40075700 | -0.93877700 | 1.65480400  |
| H | -8.04357900 | -1.75190400 | 2.01297200  |
| H | -8.03439500 | -0.04155600 | 1.61004800  |
| C | -6.85905500 | -1.28553900 | 0.25554100  |
| H | -6.33135800 | -2.24491600 | 0.30360800  |
| H | -7.68465200 | -1.41339100 | -0.45577900 |
| C | -5.89191500 | -0.21581600 | -0.30325300 |
| H | -5.36686000 | -0.64179400 | -1.16793300 |
| C | 1.62628700  | 0.16335600  | -0.05106700 |
| C | 2.35185400  | -0.01627200 | 1.28968700  |
| C | 2.43920400  | -0.50030500 | -0.98255100 |
| C | 3.59281100  | -1.06609300 | -0.30930000 |
| O | 2.00409700  | 0.40084500  | 2.40398200  |
| N | 3.50697200  | -0.77004000 | 1.03971000  |
| C | 2.28575100  | -0.67993800 | -2.38810900 |
| C | 4.55425100  | -1.79019900 | -1.00548800 |
| C | 3.25014900  | -1.39950400 | -3.07436600 |
| C | 4.36758100  | -1.94046400 | -2.38654800 |
| H | 5.10982000  | -2.49528900 | -2.95131400 |
| H | 5.42416500  | -2.20455000 | -0.51190800 |
| H | 3.15750100  | -1.55467500 | -4.14250700 |
| H | 1.41494800  | -0.26788900 | -2.88994100 |
| H | 4.21097000  | -0.95225300 | 1.74713600  |

|   |             |             |             |
|---|-------------|-------------|-------------|
| F | 5.43553200  | -0.59820800 | 3.14929200  |
| C | 5.30788600  | -0.76736500 | 4.55849200  |
| C | 4.07631900  | -0.49949300 | 5.13834300  |
| C | 6.42882200  | -1.18565300 | 5.26001900  |
| C | 3.97087600  | -0.66832000 | 6.52572600  |
| H | 3.24103400  | -0.16928900 | 4.53112600  |
| C | 6.30029500  | -1.34793100 | 6.64570200  |
| H | 7.36300100  | -1.37120600 | 4.74485700  |
| C | 5.07590600  | -1.09075700 | 7.27613500  |
| H | 3.02520300  | -0.46539500 | 7.01642200  |
| H | 7.15650700  | -1.67166200 | 7.22692000  |
| H | 4.98486100  | -1.21633000 | 8.34933100  |
| C | 4.39167000  | 2.50114200  | 0.45520400  |
| C | 3.20858900  | 2.89906000  | -0.07494200 |
| H | 2.46376300  | 3.40451600  | 0.53005000  |
| H | 2.95599300  | 2.77398800  | -1.12056600 |
| C | 5.46793500  | 1.86905400  | -0.33726400 |
| C | 6.52657200  | 1.16790700  | 0.28861000  |
| C | 5.48893400  | 1.95655600  | -1.74832300 |
| C | 7.53777100  | 0.57391000  | -0.46541200 |
| H | 6.57334100  | 1.10548700  | 1.36825000  |
| C | 6.50220400  | 1.36083800  | -2.49436100 |
| H | 4.72716700  | 2.52997900  | -2.26432000 |
| C | 7.55015000  | 0.65677500  | -1.86989000 |
| H | 6.50192500  | 1.46657500  | -3.57545300 |
| C | 4.59872400  | 2.67166400  | 1.94102000  |
| H | 3.81953900  | 3.30087600  | 2.37495400  |
| H | 4.61935800  | 1.71056100  | 2.46278800  |
| F | 5.87027700  | 3.30427100  | 2.21047400  |
| H | 8.34670900  | 0.05742400  | 0.04363500  |
| C | 8.65174800  | 0.01047700  | -2.68164700 |
| C | 8.34282900  | -1.45413400 | -3.08405900 |
| H | 9.58848600  | 0.02684100  | -2.10919800 |
| H | 8.82976000  | 0.59530600  | -3.59354500 |
| C | 9.47566700  | -2.10591600 | -3.89696100 |
| H | 8.15691600  | -2.04548400 | -2.17455500 |
| H | 7.41133800  | -1.47544300 | -3.66979500 |
| C | 9.16950800  | -3.55884800 | -4.29337600 |
| H | 9.66076100  | -1.50885900 | -4.80144300 |
| H | 10.40527200 | -2.07242400 | -3.31090000 |
| H | 9.99218400  | -3.99435300 | -4.87071400 |
| H | 9.01573700  | -4.18731400 | -3.40696900 |
| H | 8.26307400  | -3.61904300 | -4.90921700 |

**(30) TS<sub>2-3</sub>-PhF**

|                                  |                             |
|----------------------------------|-----------------------------|
| Zero-point correction =          | 1.193025 (Hartree/Particle) |
| Thermal correction to Energy =   | 1.269423                    |
| Thermal correction to Enthalpy = | 1.270367                    |

|                                               |             |             |              |
|-----------------------------------------------|-------------|-------------|--------------|
| Thermal correction to Gibbs Free Energy =     |             |             | 1.063459     |
| Sum of electronic and zero-point Energies =   |             |             | -4636.534843 |
| Sum of electronic and thermal Energies =      |             |             | -4636.458445 |
| Sum of electronic and thermal Enthalpies =    |             |             | -4636.457501 |
| Sum of electronic and thermal Free Energies = |             |             | -4636.664409 |
| Au                                            | 0.30667800  | -1.59464900 | -0.43981600  |
| Au                                            | 1.19095500  | 1.58525900  | -2.02880300  |
| P                                             | 2.39542300  | -2.86605000 | -0.53626500  |
| P                                             | 1.12615700  | 3.22065400  | -0.29560500  |
| Cl                                            | 1.13522100  | -0.12816800 | -3.73623100  |
| O                                             | 3.19668000  | 1.58272600  | 0.97518000   |
| O                                             | 3.95988400  | -0.61569900 | 0.67275800   |
| C                                             | 2.74857300  | -3.68558700 | 1.12021600   |
| C                                             | 3.97499800  | -4.32914600 | 1.35580400   |
| H                                             | 4.74418200  | -4.33611000 | 0.58979800   |
| C                                             | 4.21130300  | -4.95870600 | 2.58363700   |
| H                                             | 5.16003300  | -5.45605000 | 2.75911600   |
| C                                             | 3.22816500  | -4.94611400 | 3.58166700   |
| H                                             | 3.41369100  | -5.43498300 | 4.53272900   |
| C                                             | 2.00828400  | -4.29875500 | 3.35153300   |
| H                                             | 1.24628600  | -4.27958200 | 4.12465500   |
| C                                             | 1.76620300  | -3.66719200 | 2.12437500   |
| H                                             | 0.82473500  | -3.15063700 | 1.95907800   |
| C                                             | 2.01630400  | -4.27271200 | -1.73227800  |
| C                                             | 2.19207100  | -5.62054600 | -1.38686300  |
| H                                             | 2.57692300  | -5.89321300 | -0.41033100  |
| C                                             | 1.86553600  | -6.62426800 | -2.30824400  |
| H                                             | 2.00082000  | -7.66600100 | -2.03585100  |
| C                                             | 1.37105500  | -6.28595600 | -3.57302200  |
| H                                             | 1.12287700  | -7.06558800 | -4.28533200  |
| C                                             | 1.19796700  | -4.93911400 | -3.91868900  |
| H                                             | 0.81963500  | -4.67084100 | -4.90002300  |
| C                                             | 1.51224400  | -3.93049600 | -3.00151500  |
| H                                             | 1.37243400  | -2.88770700 | -3.27410000  |
| C                                             | -0.36863500 | 4.35620100  | -0.41751400  |
| C                                             | -1.31635500 | 4.14552600  | -1.42916700  |
| H                                             | -1.20540600 | 3.30898800  | -2.11087400  |
| C                                             | -2.39956400 | 5.02267800  | -1.56643600  |
| H                                             | -3.12124400 | 4.86202500  | -2.36012700  |
| C                                             | -2.54339400 | 6.10516000  | -0.69339100  |
| H                                             | -3.37878300 | 6.78786100  | -0.80575600  |
| C                                             | -1.60047200 | 6.31408400  | 0.32133100   |
| H                                             | -1.70451900 | 7.15595300  | 0.99741000   |
| C                                             | -0.51316600 | 5.44652200  | 0.45753300   |
| H                                             | 0.22233000  | 5.63125400  | 1.23240900   |
| C                                             | 2.57017300  | 4.41696500  | -0.23251200  |
| C                                             | 2.95509300  | 5.02565900  | 0.97110400   |
| H                                             | 2.47563200  | 4.74675500  | 1.90411700   |

|   |             |             |             |
|---|-------------|-------------|-------------|
| C | 3.97359600  | 5.98648500  | 0.97035300  |
| H | 4.26762800  | 6.46001100  | 1.90145100  |
| C | 4.61111600  | 6.33461200  | -0.22712400 |
| H | 5.39865400  | 7.08085900  | -0.22537100 |
| C | 4.23393600  | 5.71670600  | -1.42520200 |
| H | 4.72952100  | 5.97871800  | -2.35395400 |
| C | 3.21367800  | 4.75775800  | -1.43065000 |
| H | 2.92399900  | 4.27663300  | -2.35988700 |
| C | 4.06963500  | -2.23365800 | -1.08965800 |
| C | 4.67925700  | -1.18269300 | -0.38667300 |
| C | 5.99034400  | -0.77613500 | -0.67667100 |
| C | 6.66744000  | -1.39625700 | -1.73365300 |
| H | 7.67598500  | -1.07369600 | -1.97514100 |
| C | 6.06360500  | -2.41993900 | -2.46865900 |
| H | 6.59407100  | -2.89120400 | -3.28845900 |
| C | 4.77270200  | -2.84509900 | -2.13783600 |
| H | 4.31285100  | -3.65144000 | -2.69556300 |
| C | 0.99558600  | 2.37746400  | 1.36953900  |
| C | 2.06372700  | 1.56797000  | 1.79337800  |
| C | 1.99987800  | 0.81699500  | 2.97534200  |
| C | 0.82109200  | 0.88706600  | 3.73234300  |
| H | 0.75196300  | 0.30918600  | 4.64909600  |
| C | -0.25989900 | 1.67431800  | 3.32350500  |
| H | -1.17403200 | 1.69985300  | 3.90574600  |
| C | -0.17245900 | 2.42042100  | 2.14244100  |
| H | -1.01107100 | 3.02765400  | 1.82260200  |
| C | 3.17607500  | -0.05353600 | 3.36216700  |
| H | 3.00063300  | -1.07800700 | 3.01207600  |
| H | 3.26903600  | -0.09792500 | 4.45385000  |
| C | 6.58874400  | 0.32086400  | 0.16766900  |
| H | 7.03058200  | -0.09821700 | 1.08391600  |
| H | 7.40293900  | 0.81570300  | -0.37263100 |
| C | 4.32189700  | 0.69740500  | 1.24203400  |
| C | 4.49999800  | 0.46512700  | 2.75643400  |
| H | 5.25576700  | -0.32333900 | 2.85830600  |
| C | 5.02868900  | 1.73351600  | 3.46253200  |
| H | 5.21635700  | 1.49186100  | 4.51596800  |
| H | 4.25676700  | 2.51496600  | 3.45059500  |
| C | 6.30732400  | 2.26378800  | 2.79179000  |
| H | 6.65274000  | 3.17039500  | 3.30329200  |
| H | 7.11326200  | 1.52340300  | 2.89686200  |
| C | 6.04876300  | 2.57426900  | 1.30632600  |
| H | 5.32432200  | 3.39273500  | 1.23468100  |
| H | 6.96821800  | 2.92295900  | 0.81967900  |
| C | 5.50527200  | 1.36226100  | 0.51282800  |
| H | 5.09428400  | 1.72998300  | -0.43635400 |
| C | -1.61855700 | -0.94892100 | -0.19872200 |
| C | -2.18685900 | -0.77198900 | 1.20778500  |

|   |             |             |             |
|---|-------------|-------------|-------------|
| C | -2.41881400 | -0.08063500 | -1.01981700 |
| C | -3.38864200 | 0.58205800  | -0.19897100 |
| O | -1.82275900 | -1.34033900 | 2.25825500  |
| N | -3.22093200 | 0.15361900  | 1.12193100  |
| C | -2.35694300 | 0.21175400  | -2.39845200 |
| C | -4.28343400 | 1.50664200  | -0.72415500 |
| C | -3.26347200 | 1.12849300  | -2.93187100 |
| C | -4.21417800 | 1.75913500  | -2.10316500 |
| H | -4.90820800 | 2.47041400  | -2.53939500 |
| H | -5.00956200 | 2.01392100  | -0.09999500 |
| H | -3.23288300 | 1.36432300  | -3.98944400 |
| H | -1.59640000 | -0.25077600 | -3.01970900 |
| H | -3.68410200 | 0.53268200  | 1.94111900  |
| F | -3.94474800 | 1.28246000  | 3.68924200  |
| C | -4.30212900 | 0.55913800  | 4.85879600  |
| C | -3.64700700 | -0.63838800 | 5.11102400  |
| C | -5.28615100 | 1.09667500  | 5.67653500  |
| C | -4.01226300 | -1.33976300 | 6.26832100  |
| H | -2.88699500 | -1.00141100 | 4.42791000  |
| C | -5.63480600 | 0.37921300  | 6.82834500  |
| H | -5.75591700 | 2.03911700  | 5.42380400  |
| C | -5.00099600 | -0.83491200 | 7.12298400  |
| H | -3.52264800 | -2.27973400 | 6.49852600  |
| H | -6.39902100 | 0.77083800  | 7.49060400  |
| H | -5.27660900 | -1.38471900 | 8.01601500  |
| C | -3.77095300 | -3.01831700 | 0.03406300  |
| C | -2.54007500 | -3.03487600 | -0.61006300 |
| H | -1.72835100 | -3.61146500 | -0.18485600 |
| H | -2.43462400 | -2.80241500 | -1.65986400 |
| C | -4.96327900 | -2.43108300 | -0.55742300 |
| C | -6.10012200 | -2.09135100 | 0.22824000  |
| C | -5.03162500 | -2.16714700 | -1.95196300 |
| C | -7.21444600 | -1.49749300 | -0.34976400 |
| H | -6.10614900 | -2.31240100 | 1.28598900  |
| C | -6.15595200 | -1.58117500 | -2.52018800 |
| H | -4.21579400 | -2.46049400 | -2.60071100 |
| C | -7.26973100 | -1.22859200 | -1.73312700 |
| H | -6.18551600 | -1.41002700 | -3.59160900 |
| C | -3.78566100 | -3.58196400 | 1.43929400  |
| H | -3.02514500 | -4.35858200 | 1.54346300  |
| H | -3.58920300 | -2.80680400 | 2.19076100  |
| F | -5.05102200 | -4.18567800 | 1.76486600  |
| H | -8.06878300 | -1.25071700 | 0.27310800  |
| C | -8.48074200 | -0.56754600 | -2.34717600 |
| C | -8.40620800 | 0.98238000  | -2.30930100 |
| H | -9.38623800 | -0.88886900 | -1.81638600 |
| H | -8.59070100 | -0.89040500 | -3.39019600 |
| C | -9.64559400 | 1.65236200  | -2.92924100 |

|   |              |            |             |
|---|--------------|------------|-------------|
| H | -8.29141700  | 1.31255100 | -1.26650800 |
| H | -7.50201100  | 1.31045500 | -2.84270900 |
| C | -9.57380100  | 3.18716400 | -2.89326000 |
| H | -9.75884200  | 1.31304800 | -3.96879400 |
| H | -10.54466500 | 1.31359500 | -2.39486700 |
| H | -10.46918900 | 3.63578500 | -3.33673100 |
| H | -9.49147000  | 3.55557300 | -1.86302900 |
| H | -8.70479900  | 3.55634200 | -3.45250000 |

### (31) IM<sub>2</sub>-PhCl

|                                               |             |             |                             |
|-----------------------------------------------|-------------|-------------|-----------------------------|
| Zero-point correction =                       |             |             | 1.190978 (Hartree/Particle) |
| Thermal correction to Energy =                |             |             | 1.269282                    |
| Thermal correction to Enthalpy =              |             |             | 1.270226                    |
| Thermal correction to Gibbs Free Energy =     |             |             | 1.053885                    |
| Sum of electronic and zero-point Energies =   |             |             | -4996.898621                |
| Sum of electronic and thermal Energies =      |             |             | -4996.820317                |
| Sum of electronic and thermal Enthalpies =    |             |             | -4996.819372                |
| Sum of electronic and thermal Free Energies = |             |             | -4997.035713                |
| Au                                            | -0.22042800 | 1.38104200  | -0.36032200                 |
| Au                                            | -1.90499200 | -1.09643000 | -2.12557100                 |
| P                                             | -1.93137100 | 3.06007000  | 0.19090700                  |
| P                                             | -1.90340100 | -3.03073400 | -0.73157400                 |
| Cl                                            | -1.81965500 | 0.86519600  | -3.54812700                 |
| O                                             | -3.67738700 | -1.33384900 | 0.83824400                  |
| O                                             | -3.94042200 | 0.98053500  | 0.94493400                  |
| C                                             | -1.96401800 | 3.44410600  | 2.02910700                  |
| C                                             | -2.99494700 | 4.21863700  | 2.58500900                  |
| H                                             | -3.80405400 | 4.58073600  | 1.95923400                  |
| C                                             | -2.98369000 | 4.52015400  | 3.95186300                  |
| H                                             | -3.78135800 | 5.12074500  | 4.37651600                  |
| C                                             | -1.94686500 | 4.05018400  | 4.76762400                  |
| H                                             | -1.93926300 | 4.28771200  | 5.82627400                  |
| C                                             | -0.92173100 | 3.27290900  | 4.21582300                  |
| H                                             | -0.11877200 | 2.90301000  | 4.84493700                  |
| C                                             | -0.92853500 | 2.96683600  | 2.84903500                  |
| H                                             | -0.13957000 | 2.34945500  | 2.42930000                  |
| C                                             | -1.27209000 | 4.61347300  | -0.64793700                 |
| C                                             | -1.04174800 | 5.80503700  | 0.05431100                  |
| H                                             | -1.26296600 | 5.87061000  | 1.11353400                  |
| C                                             | -0.52028000 | 6.91988300  | -0.61628500                 |
| H                                             | -0.34071600 | 7.83914300  | -0.06865100                 |
| C                                             | -0.23534800 | 6.84933700  | -1.98410800                 |
| H                                             | 0.16551400  | 7.71515200  | -2.50059200                 |
| C                                             | -0.46760500 | 5.65898200  | -2.68620200                 |
| H                                             | -0.25188000 | 5.60109100  | -3.74798900                 |
| C                                             | -0.97847700 | 4.53816500  | -2.02275800                 |
| H                                             | -1.15411000 | 3.61598500  | -2.57050600                 |
| C                                             | -0.49237200 | -4.20665700 | -1.12998900                 |



|   |             |             |             |
|---|-------------|-------------|-------------|
| C | 0.61113700  | -3.73116600 | -1.85503600 |
| H | 0.62829200  | -2.70175200 | -2.19771500 |
| C | 1.67558800  | -4.58978900 | -2.15431500 |
| H | 2.52284800  | -4.21758800 | -2.72061700 |
| C | 1.64000600  | -5.92462000 | -1.73569200 |
| H | 2.46193200  | -6.59160000 | -1.97364000 |
| C | 0.53621300  | -6.40265600 | -1.01881400 |
| H | 0.50023000  | -7.43949900 | -0.70173300 |
| C | -0.52996200 | -5.54831100 | -0.71648700 |
| H | -1.38812200 | -5.93210400 | -0.17578500 |
| C | -3.45167100 | -4.08158400 | -0.83703000 |
| C | -3.91262700 | -4.80609100 | 0.27243100  |
| H | -3.40296900 | -4.72829000 | 1.22753200  |
| C | -5.04262400 | -5.62418100 | 0.14809200  |
| H | -5.39749400 | -6.18563700 | 1.00617100  |
| C | -5.71132300 | -5.71762200 | -1.07861900 |
| H | -6.58613800 | -6.35232000 | -1.17253300 |
| C | -5.25246400 | -4.98973900 | -2.18323500 |
| H | -5.77066900 | -5.05632800 | -3.13390400 |
| C | -4.12402800 | -4.17029600 | -2.06500800 |
| H | -3.77486900 | -3.59997300 | -2.92041400 |
| C | -3.73188300 | 2.99516900  | -0.32251300 |
| C | -4.54461300 | 1.94128600  | 0.12622500  |
| C | -5.91204100 | 1.89195200  | -0.18322900 |
| C | -6.45399800 | 2.90571400  | -0.98282400 |
| H | -7.50826200 | 2.86557700  | -1.23969600 |
| C | -5.65980300 | 3.95642100  | -1.44772600 |
| H | -6.08991100 | 4.73504300  | -2.06721200 |
| C | -4.30290500 | 4.00262500  | -1.11262600 |
| H | -3.68904100 | 4.81895700  | -1.47174800 |
| C | -1.66698400 | -2.56828100 | 1.06661100  |
| C | -2.58812400 | -1.67759100 | 1.64309800  |
| C | -2.43777600 | -1.19760600 | 2.95121000  |
| C | -1.33198900 | -1.64717700 | 3.68765200  |
| H | -1.20356500 | -1.29327100 | 4.70639800  |
| C | -0.40415700 | -2.53608300 | 3.13630900  |
| H | 0.44610500  | -2.87039200 | 3.72047800  |
| C | -0.56899200 | -2.99548300 | 1.82384800  |
| H | 0.15353200  | -3.67894500 | 1.39349500  |
| C | -3.44548200 | -0.21063400 | 3.50014800  |
| H | -3.06185400 | 0.80876600  | 3.37204300  |
| H | -3.58134700 | -0.37021400 | 4.57637300  |
| C | -6.72739900 | 0.73765500  | 0.34626600  |
| H | -7.13673300 | 0.97953000  | 1.33781200  |
| H | -7.58770500 | 0.55408700  | -0.30660700 |
| C | -4.60549300 | -0.29801800 | 1.25944800  |
| C | -4.81119900 | -0.33151200 | 2.78771000  |
| H | -5.41058500 | 0.55176400  | 3.04083800  |

|   |             |             |             |
|---|-------------|-------------|-------------|
| C | -5.59691500 | -1.59201300 | 3.21599300  |
| H | -5.79451700 | -1.52884300 | 4.29337300  |
| H | -4.97511000 | -2.48433300 | 3.06108100  |
| C | -6.91367000 | -1.74295400 | 2.43342500  |
| H | -7.42634800 | -2.66355400 | 2.73729300  |
| H | -7.59120500 | -0.91529600 | 2.68724900  |
| C | -6.64683300 | -1.77626600 | 0.91697700  |
| H | -6.07173600 | -2.67716800 | 0.67445900  |
| H | -7.59067000 | -1.84313400 | 0.36158800  |
| C | -5.86690000 | -0.53955400 | 0.41158600  |
| H | -5.50608100 | -0.74834300 | -0.60400400 |
| C | 1.52294400  | 0.44513500  | -0.68952000 |
| C | 2.48623000  | 0.07746500  | 0.44860600  |
| C | 2.18162400  | 0.02164400  | -1.85735000 |
| C | 3.45568000  | -0.57427700 | -1.50879800 |
| O | 2.32510200  | 0.26384500  | 1.66500900  |
| N | 3.59852500  | -0.53771000 | -0.13057800 |
| C | 1.78546900  | 0.09121500  | -3.22287600 |
| C | 4.30871700  | -1.08071200 | -2.48222700 |
| C | 2.64146500  | -0.41602300 | -4.18923500 |
| C | 3.88325900  | -0.98918900 | -3.81678500 |
| H | 4.53431700  | -1.37424600 | -4.59544000 |
| H | 5.26767100  | -1.51682100 | -2.23041200 |
| H | 2.36522000  | -0.37874500 | -5.23599100 |
| H | 0.82260500  | 0.52220900  | -3.48188100 |
| H | 4.39738800  | -0.86425900 | 0.40121400  |
| C | 5.28910800  | -2.41368700 | 3.50225900  |
| C | 4.10551400  | -1.80584000 | 3.90932800  |
| C | 5.90433500  | -3.43671400 | 4.21688200  |
| C | 3.51525300  | -2.25511100 | 5.09967500  |
| H | 3.65061400  | -1.01137300 | 3.32892600  |
| C | 5.29732900  | -3.87159400 | 5.40266500  |
| H | 6.82822800  | -3.88017500 | 3.86688300  |
| C | 4.10638700  | -3.28277400 | 5.84421700  |
| H | 2.59778700  | -1.78848300 | 5.44318700  |
| H | 5.76121000  | -4.66611500 | 5.97709500  |
| H | 3.64525900  | -3.62012500 | 6.76613500  |
| C | 3.85504900  | 3.12877000  | 0.20637400  |
| C | 2.87642400  | 3.34545200  | -0.70859200 |
| H | 1.91863400  | 3.76234800  | -0.41887100 |
| H | 3.00563300  | 3.16036800  | -1.76800500 |
| C | 5.20542100  | 2.62854900  | -0.13455300 |
| C | 6.11166100  | 2.22510200  | 0.87286400  |
| C | 5.63961600  | 2.52744000  | -1.47729000 |
| C | 7.36636100  | 1.71066800  | 0.54748800  |
| H | 5.84996700  | 2.34654600  | 1.91543800  |
| C | 6.89661700  | 2.01782400  | -1.79446200 |
| H | 5.00214700  | 2.87629700  | -2.28200900 |

|    |             |             |             |
|----|-------------|-------------|-------------|
| C  | 7.78397800  | 1.58834000  | -0.78976500 |
| H  | 7.20539100  | 1.96772700  | -2.83490500 |
| C  | 3.50009200  | 3.33454400  | 1.65876000  |
| H  | 2.53542400  | 3.83612900  | 1.75685300  |
| H  | 3.46693600  | 2.38105400  | 2.19777400  |
| F  | 4.48065300  | 4.15522100  | 2.33494600  |
| H  | 8.03960600  | 1.41171200  | 1.34528600  |
| Cl | 6.10398200  | -1.82947900 | 1.95061700  |
| C  | 9.12978800  | 0.99090000  | -1.13679000 |
| C  | 9.07648600  | -0.54685300 | -1.32620900 |
| H  | 9.85312600  | 1.22305100  | -0.34434700 |
| H  | 9.51329100  | 1.44805400  | -2.05857300 |
| C  | 10.44802600 | -1.15814600 | -1.66379400 |
| H  | 8.68317700  | -1.00887700 | -0.40851000 |
| H  | 8.36091900  | -0.78553900 | -2.12819300 |
| C  | 10.39393200 | -2.68216900 | -1.85479300 |
| H  | 10.84027300 | -0.68610600 | -2.57627600 |
| H  | 11.15857600 | -0.91327900 | -0.86132400 |
| H  | 11.38337100 | -3.08796100 | -2.09238200 |
| H  | 10.03728400 | -3.18201900 | -0.94549000 |
| H  | 9.71655900  | -2.95461300 | -2.67425600 |

**(32) TS<sub>2-3</sub>-PhCl**

|                                               |             |             |                             |
|-----------------------------------------------|-------------|-------------|-----------------------------|
| Zero-point correction =                       |             |             | 1.191516 (Hartree/Particle) |
| Thermal correction to Energy =                |             |             | 1.268434                    |
| Thermal correction to Enthalpy =              |             |             | 1.269378                    |
| Thermal correction to Gibbs Free Energy =     |             |             | 1.059501                    |
| Sum of electronic and zero-point Energies =   |             |             | -4996.894209                |
| Sum of electronic and thermal Energies =      |             |             | -4996.817291                |
| Sum of electronic and thermal Enthalpies =    |             |             | -4996.816347                |
| Sum of electronic and thermal Free Energies = |             |             | -4997.026224                |
| Au                                            | -0.15328500 | 1.59810100  | -0.19100200                 |
| Au                                            | -1.23606100 | -1.12705700 | -2.20747100                 |
| P                                             | -2.17515600 | 2.98843900  | -0.09448800                 |
| P                                             | -1.36665100 | -3.04818200 | -0.79862700                 |
| Cl                                            | -1.00736100 | 0.82167400  | -3.63245600                 |
| O                                             | -3.50784200 | -1.53655700 | 0.46390800                  |
| O                                             | -4.06580200 | 0.73496800  | 0.47679100                  |
| C                                             | -2.60371200 | 3.43555500  | 1.68106400                  |
| C                                             | -3.81475200 | 4.07497400  | 1.99199200                  |
| H                                             | -4.53340200 | 4.29269800  | 1.20908700                  |
| C                                             | -4.10149400 | 4.42513300  | 3.31678700                  |
| H                                             | -5.03809100 | 4.91990700  | 3.55120900                  |
| C                                             | -3.18230100 | 4.14002400  | 4.33391800                  |
| H                                             | -3.40549000 | 4.41413900  | 5.35981600                  |
| C                                             | -1.97690100 | 3.49790800  | 4.02607100                  |
| H                                             | -1.26360500 | 3.27055800  | 4.81130700                  |
| C                                             | -1.68539800 | 3.14395400  | 2.70232400                  |

|   |             |             |             |
|---|-------------|-------------|-------------|
| H | -0.75593300 | 2.63138000  | 2.47200100  |
| C | -1.58093300 | 4.59501700  | -0.88772400 |
| C | -1.68042300 | 5.83251100  | -0.23578200 |
| H | -2.12744400 | 5.90030000  | 0.74894900  |
| C | -1.19472000 | 6.99012200  | -0.85964600 |
| H | -1.27157000 | 7.94540300  | -0.35070400 |
| C | -0.61807400 | 6.91523500  | -2.13217500 |
| H | -0.24722900 | 7.81422000  | -2.61449000 |
| C | -0.52219600 | 5.67900500  | -2.78411900 |
| H | -0.08217700 | 5.61765300  | -3.77414000 |
| C | -0.99451600 | 4.51663500  | -2.16517900 |
| H | -0.91785900 | 3.55963900  | -2.67369200 |
| C | 0.12265100  | -4.18250300 | -0.96114800 |
| C | 1.22714700  | -3.77032300 | -1.72078100 |
| H | 1.22454700  | -2.79444900 | -2.19700400 |
| C | 2.32401800  | -4.62567700 | -1.88084900 |
| H | 3.16989000  | -4.30486700 | -2.47890700 |
| C | 2.32454700  | -5.88991500 | -1.28286100 |
| H | 3.17219700  | -6.55448300 | -1.41360300 |
| C | 1.22253800  | -6.30362100 | -0.52305600 |
| H | 1.21442200  | -7.28617300 | -0.06433100 |
| C | 0.12239900  | -5.45516000 | -0.36477600 |
| H | -0.73649200 | -5.79439700 | 0.20458300  |
| C | -2.82852300 | -4.17936200 | -1.12229500 |
| C | -3.38536200 | -4.95693800 | -0.09548400 |
| H | -3.02174900 | -4.86176400 | 0.92298400  |
| C | -4.42630100 | -5.84875600 | -0.38395700 |
| H | -4.85374200 | -6.45109900 | 0.40981000  |
| C | -4.91293900 | -5.96134400 | -1.69232000 |
| H | -5.71884100 | -6.65292800 | -1.91325900 |
| C | -4.36192700 | -5.17792400 | -2.71379700 |
| H | -4.73962500 | -5.25839700 | -3.72664500 |
| C | -3.31966800 | -4.28634200 | -2.43055900 |
| H | -2.89766400 | -3.67565700 | -3.22345400 |
| C | -3.83112300 | 2.66894100  | -0.91223300 |
| C | -4.60188400 | 1.56371000  | -0.51504200 |
| C | -5.88770500 | 1.34591800  | -1.03309700 |
| C | -6.37837800 | 2.23013000  | -2.00189600 |
| H | -7.36570700 | 2.05748500  | -2.41995500 |
| C | -5.61831800 | 3.32228700  | -2.42610000 |
| H | -6.00588100 | 4.00030500  | -3.17789100 |
| C | -4.35236200 | 3.54486900  | -1.87489500 |
| H | -3.76912800 | 4.39809200  | -2.19802500 |
| C | -1.43136300 | -2.54490600 | 1.00285100  |
| C | -2.51342800 | -1.75174200 | 1.42148300  |
| C | -2.59535800 | -1.23583200 | 2.72214400  |
| C | -1.55720200 | -1.54404500 | 3.61259400  |
| H | -1.60636500 | -1.15849200 | 4.62609500  |

|   |             |             |             |
|---|-------------|-------------|-------------|
| C | -0.46946300 | -2.32931700 | 3.21848400  |
| H | 0.32575300  | -2.54859500 | 3.92183200  |
| C | -0.40462500 | -2.82955800 | 1.91173500  |
| H | 0.43974000  | -3.43378100 | 1.60339900  |
| C | -3.77041600 | -0.36042000 | 3.09991900  |
| H | -3.48882800 | 0.69350700  | 2.99121000  |
| H | -4.03208700 | -0.51583700 | 4.15336500  |
| C | -6.66231600 | 0.15507100  | -0.52610500 |
| H | -7.21076600 | 0.41630300  | 0.39065000  |
| H | -7.41450300 | -0.14890300 | -1.26199000 |
| C | -4.60340800 | -0.61543700 | 0.72977100  |
| C | -5.00636600 | -0.64763000 | 2.21845300  |
| H | -5.72541200 | 0.16847400  | 2.36062500  |
| C | -5.70358600 | -1.97682800 | 2.58312300  |
| H | -6.04304800 | -1.91716400 | 3.62479100  |
| H | -4.97866800 | -2.80094200 | 2.53424600  |
| C | -6.88582900 | -2.27611000 | 1.64490400  |
| H | -7.34449300 | -3.23523300 | 1.91231500  |
| H | -7.66506400 | -1.51206000 | 1.77925700  |
| C | -6.41631500 | -2.31798700 | 0.17933100  |
| H | -5.72580500 | -3.15985800 | 0.04957000  |
| H | -7.26501900 | -2.49787300 | -0.49263500 |
| C | -5.70079000 | -1.02253100 | -0.26956400 |
| H | -5.18119800 | -1.22747800 | -1.21413100 |
| C | 1.78304800  | 0.90233300  | -0.07121000 |
| C | 2.38734400  | 0.48322100  | 1.26694100  |
| C | 2.57254100  | 0.20486100  | -1.05335000 |
| C | 3.58360700  | -0.56051300 | -0.39093300 |
| O | 2.03027000  | 0.82856100  | 2.41241100  |
| N | 3.44908800  | -0.37154600 | 0.98850300  |
| C | 2.46791300  | 0.15092500  | -2.45870100 |
| C | 4.48004800  | -1.35758000 | -1.09323600 |
| C | 3.37036900  | -0.64128200 | -3.16920900 |
| C | 4.36480300  | -1.37752200 | -2.49200200 |
| H | 5.05762900  | -1.98443700 | -3.06616600 |
| H | 5.24001800  | -1.94180700 | -0.58768400 |
| H | 3.30377600  | -0.69831700 | -4.24955100 |
| H | 1.67594200  | 0.69170100  | -2.96753900 |
| H | 4.02530400  | -0.80040000 | 1.70375500  |
| C | 4.11997300  | -1.76526200 | 5.20301100  |
| C | 2.99231200  | -0.95134400 | 5.21154600  |
| C | 4.48507900  | -2.57812800 | 6.27228700  |
| C | 2.19170500  | -0.96030100 | 6.36393400  |
| H | 2.74261300  | -0.32694100 | 4.36150400  |
| C | 3.67101300  | -2.57157200 | 7.41251200  |
| H | 5.37436800  | -3.19361500 | 6.22252400  |
| C | 2.52679500  | -1.76550000 | 7.45859400  |
| H | 1.30952500  | -0.32832200 | 6.39927500  |

|    |             |             |             |
|----|-------------|-------------|-------------|
| H  | 3.93638300  | -3.19397400 | 8.25967300  |
| H  | 1.90245300  | -1.76192300 | 8.34624900  |
| C  | 3.93291900  | 2.90237300  | 0.52576800  |
| C  | 2.70310600  | 3.01611600  | -0.11547900 |
| H  | 1.88720100  | 3.52033700  | 0.38891400  |
| H  | 2.61104700  | 2.96725100  | -1.19037800 |
| C  | 5.12914800  | 2.42671600  | -0.15080700 |
| C  | 6.25370900  | 1.92836300  | 0.56528500  |
| C  | 5.21088900  | 2.43543900  | -1.57024200 |
| C  | 7.36795200  | 1.44261800  | -0.10740000 |
| H  | 6.24747200  | 1.93610100  | 1.64563100  |
| C  | 6.33562700  | 1.95901400  | -2.23048500 |
| H  | 4.40512100  | 2.85767300  | -2.15769000 |
| C  | 7.43802100  | 1.44850500  | -1.51566100 |
| H  | 6.37637300  | 1.99959100  | -3.31443700 |
| C  | 3.92855700  | 3.23565600  | 2.00317100  |
| H  | 3.22760400  | 4.05063700  | 2.20022200  |
| H  | 3.62771000  | 2.37286300  | 2.61355300  |
| F  | 5.21615400  | 3.66975500  | 2.47111100  |
| H  | 8.21094300  | 1.06646000  | 0.46459300  |
| Cl | 5.20315000  | -1.77056700 | 3.70511600  |
| C  | 8.64820700  | 0.90646600  | -2.23654200 |
| C  | 8.49422900  | -0.58292300 | -2.64324400 |
| H  | 9.53596800  | 1.00881200  | -1.59958900 |
| H  | 8.83583300  | 1.49959400  | -3.14170000 |
| C  | 9.73521200  | -1.13288100 | -3.36988800 |
| H  | 8.29672300  | -1.18444400 | -1.74323900 |
| H  | 7.61093500  | -0.68800600 | -3.29012600 |
| C  | 9.57880600  | -2.60381700 | -3.78673000 |
| H  | 9.93583400  | -0.51672600 | -4.25857400 |
| H  | 10.61266900 | -1.02678000 | -2.71618600 |
| H  | 10.47618800 | -2.96629700 | -4.29980100 |
| H  | 9.41032800  | -3.24743400 | -2.91540000 |
| H  | 8.73022900  | -2.73366700 | -4.47029800 |

## Part VII: Single-Crystal X-ray Crystallography of 4 (CCDC: 1832272)

Data intensity of **4** was collected using a Bruker SMART APEX II (Mo radiation) at 296 K in a nitrogen stream. The X-ray condition of was 50 kV  $\times$  30 mA. Data collection and reduction were done by using the Bruker ApexII software package. The structures were solved by direct methods and refined by full-matrix least-squares on  $F^2$  with anisotropic displacement parameters for non-H atoms using SHELX-97. Hydrogen atoms were added at their geometrically idea positions and refined isotropically. Crystal data for **4**:  $C_{27}H_{25}FN_2O_5S$ ,  $T = 296(2)$  K, monoclinic, space group  $P2(1)$ ,  $a = 13.420(2)$  Å,  $b = 5.3749(8)$  Å,  $c = 17.821(3)$  Å,  $\alpha = 90$  deg,  $\beta = 105.381(5)$  deg,  $\gamma = 90$  deg,  $V = 1239.5(3)$  Å<sup>3</sup>.  $Z = 2$ ,  $d_{\text{calc}} = 1.363$  mg/m<sup>3</sup>. Total number of reflections 14532 ( $R_{\text{int}} = 0.0688$ ),  $R_1 = 0.1349$ ,  $wR_2 = 0.1967$  (all data), GOF = 1.024, and 325 parameters.

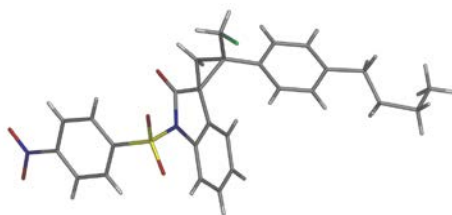

**Table S6.** Crystal data and structure refinement for **z**.

|                                 |                                   |                           |
|---------------------------------|-----------------------------------|---------------------------|
| Identification code             | z                                 |                           |
| Empirical formula               | $C_{27}H_{25}FN_2O_5S$            |                           |
| Formula weight                  | 508.55                            |                           |
| Temperature                     | 296(2) K                          |                           |
| Wavelength                      | 0.71073 Å                         |                           |
| Crystal system, space group     | Monoclinic, $P2(1)$               |                           |
| Unit cell dimensions            | $a = 13.420(2)$ Å                 | $\alpha = 90$ deg.        |
|                                 | $b = 5.3749(8)$ Å                 | $\beta = 105.381(5)$ deg. |
|                                 | $c = 17.821(3)$ Å                 | $\gamma = 90$ deg.        |
| Volume                          | $1239.5(3)$ Å <sup>3</sup>        |                           |
| Z, Calculated density           | 2, 1.363 mg/m <sup>3</sup>        |                           |
| Absorption coefficient          | $0.179$ mm <sup>-1</sup>          |                           |
| F(000)                          | 532                               |                           |
| Crystal size                    | $0.39 \times 0.17 \times 0.09$ mm |                           |
| Theta range for data collection | 1.57 to 25.00 deg.                |                           |

|                                      |                                       |
|--------------------------------------|---------------------------------------|
| Limiting indices                     | -14<=h<=15, -6<=k<=6, -21<=l<=21      |
| Reflections collected/unique         | 14532 / 4154 [ $R_{(int)} = 0.0688$ ] |
| Completeness to $\theta = 25.00$     | 99.7%                                 |
| Absorption correction                | Semi-empirical from equivalents       |
| Max. and min. transmission           | 0.9840 and 0.9334                     |
| Refinement method                    | Full-matrix least-squares on $F^2$    |
| Data / restraints / parameters       | 4154 / 22 / 325                       |
| Goodness-of-fit on $F^2$             | 1.024                                 |
| Final R indices [ $I > 2\sigma(I)$ ] | $R_1 = 0.0661$ , $wR_2 = 0.1551$      |
| R indices (all data)                 | $R_1 = 0.1349$ , $wR_2 = 0.1967$      |
| Absolute structure parameter         | -0.02(18)                             |
| Largest diff. peak and hole          | 0.392 and -0.300 e. $\text{\AA}^{-3}$ |

**Table S7.** Atomic coordinates ( $\times 10^4$ ) and equivalent isotropic displacement parameters ( $\text{\AA}^2 \times 10^3$ ) for z. U(eq) is defined as one third of the trace of the orthogonalized  $U_{ij}$  tensor.

|      | x       | y         | z       | U(eq)  |
|------|---------|-----------|---------|--------|
| S(1) | 4256(1) | 4336(3)   | 1449(1) | 68(1)  |
| O(1) | 3690(3) | 5947(9)   | 1818(2) | 82(1)  |
| O(2) | 4952(3) | 5321(8)   | 1043(2) | 77(1)  |
| O(3) | 1752(5) | -4349(17) | -928(4) | 153(3) |
| O(4) | 692(5)  | -3673(16) | -278(4) | 144(3) |
| O(5) | 6026(3) | 833(9)    | 1459(2) | 74(1)  |
| F(1) | 8168(3) | 2829(8)   | 2859(2) | 98(1)  |
| N(1) | 4942(3) | 2511(10)  | 2153(2) | 62(1)  |
| C(1) | 7532(4) | 1408(12)  | 4427(3) | 67(2)  |
| C(2) | 7997(5) | 1584(16)  | 5209(3) | 89(2)  |
| C(3) | 8703(5) | -162(16)  | 5594(4) | 82(2)  |
| C(4) | 8907(5) | -2073(17) | 5172(4) | 90(2)  |
| C(5) | 8434(4) | -2369(13) | 4392(3) | 73(2)  |
| C(6) | 7747(4) | -632(13)  | 4006(3) | 57(1)  |
| C(7) | 7313(4) | -775(13)  | 3136(3) | 57(1)  |



|       |          |           |         |         |
|-------|----------|-----------|---------|---------|
| C(8)  | 6700(4)  | -2940(12) | 2765(3) | 71(2)   |
| C(9)  | 6119(4)  | -490(13)  | 2770(3) | 56(1)   |
| C(10) | 5747(4)  | 930(12)   | 2045(3) | 55(1)   |
| C(11) | 4690(4)  | 1776(12)  | 2867(3) | 60(2)   |
| C(12) | 5372(4)  | -61(12)   | 3229(3) | 60(2)   |
| C(13) | 5264(5)  | -1135(13) | 3903(3) | 71(2)   |
| C(14) | 4465(6)  | -308(19)  | 4205(4) | 90(2)   |
| C(15) | 3817(5)  | 1570(19)  | 3844(4) | 96(3)   |
| C(16) | 3910(5)  | 2601(15)  | 3168(4) | 82(2)   |
| C(17) | 3411(4)  | 2241(12)  | 851(3)  | 59(2)   |
| C(18) | 3702(4)  | 994(14)   | 269(3)  | 67(2)   |
| C(19) | 3067(5)  | -787(16)  | -168(3) | 74(2)   |
| C(20) | 2134(5)  | -1253(13) | -9(4)   | 69(2)   |
| C(21) | 1817(5)  | 1(16)     | 553(4)  | 82(2)   |
| C(22) | 2463(5)  | 1745(15)  | 990(3)  | 75(2)   |
| C(23) | 8015(5)  | 331(14)   | 2691(4) | 72(2)   |
| C(24) | 9270(7)  | 120(30)   | 6464(5) | 170(6)  |
| C(25) | 8737(11) | 1320(40)  | 6959(6) | 267(9)  |
| C(26) | 9202(13) | 2150(50)  | 7815(7) | 275(10) |
| C(27) | 9830(14) | 40(50)    | 8186(9) | 305(13) |
| N(2)  | 1480(5)  | -3221(16) | -447(4) | 98(2)   |

**Table S8.** Bond lengths [ $\text{\AA}$ ] and angles [deg] for *z*.

|            |           |
|------------|-----------|
| S(1)-O(1)  | 1.422(5)  |
| S(1)-O(2)  | 1.427(4)  |
| S(1)-N(1)  | 1.664(5)  |
| S(1)-C(17) | 1.747(6)  |
| O(3)-N(2)  | 1.185(8)  |
| O(4)-N(2)  | 1.198(7)  |
| O(5)-C(10) | 1.200(6)  |
| F(1)-C(23) | 1.379(8)  |
| N(1)-C(10) | 1.427(7)  |
| N(1)-C(11) | 1.455(7)  |
| C(1)-C(2)  | 1.370(7)  |
| C(1)-C(6)  | 1.402(8)  |
| C(1)-H(1A) | 0.9300    |
| C(2)-C(3)  | 1.381(10) |
| C(2)-H(2A) | 0.9300    |
| C(3)-C(4)  | 1.343(10) |
| C(3)-C(24) | 1.542(9)  |
| C(4)-C(5)  | 1.376(9)  |
| C(4)-H(4A) | 0.9300    |

|                |           |
|----------------|-----------|
| C(5)-C(6)      | 1.363(8)  |
| C(5)-H(5A)     | 0.9300    |
| C(6)-C(7)      | 1.507(7)  |
| C(7)-C(8)      | 1.477(8)  |
| C(7)-C(23)     | 1.505(9)  |
| C(7)-C(9)      | 1.570(7)  |
| C(8)-C(9)      | 1.532(9)  |
| C(8)-H(8A)     | 0.9700    |
| C(8)-H(8B)     | 0.9700    |
| C(9)-C(10)     | 1.470(7)  |
| C(9)-C(12)     | 1.470(7)  |
| C(11)-C(16)    | 1.370(8)  |
| C(11)-C(12)    | 1.385(8)  |
| C(12)-C(13)    | 1.374(8)  |
| C(13)-C(14)    | 1.394(9)  |
| C(13)-H(13A)   | 0.9300    |
| C(14)-C(15)    | 1.376(11) |
| C(14)-H(14A)   | 0.9300    |
| C(15)-C(16)    | 1.362(9)  |
| C(15)-H(15A)   | 0.9300    |
| C(16)-H(16A)   | 0.9300    |
| C(17)-C(18)    | 1.375(8)  |
| C(17)-C(22)    | 1.384(7)  |
| C(18)-C(19)    | 1.378(9)  |
| C(18)-H(18A)   | 0.9300    |
| C(19)-C(20)    | 1.378(8)  |
| C(19)-H(19A)   | 0.9300    |
| C(20)-C(21)    | 1.367(9)  |
| C(20)-N(2)     | 1.460(9)  |
| C(21)-C(22)    | 1.371(9)  |
| C(21)-H(21A)   | 0.9300    |
| C(22)-H(22A)   | 0.9300    |
| C(23)-H(23A)   | 0.9700    |
| C(23)-H(23B)   | 0.9700    |
| C(24)-C(25)    | 1.428(9)  |
| C(24)-H(24A)   | 0.9700    |
| C(24)-H(24B)   | 0.9700    |
| C(25)-C(26)    | 1.553(9)  |
| C(25)-H(25A)   | 0.9700    |
| C(25)-H(25B)   | 0.9700    |
| C(26)-C(27)    | 1.463(10) |
| C(26)-H(26A)   | 0.9700    |
| C(26)-H(26B)   | 0.9700    |
| C(27)-H(27A)   | 0.9600    |
| C(27)-H(27B)   | 0.9600    |
| C(27)-H(27C)   | 0.9600    |
| O(1)-S(1)-O(2) | 120.7(3)  |
| O(1)-S(1)-N(1) | 105.5(2)  |

|                   |          |
|-------------------|----------|
| O(2)-S(1)-N(1)    | 107.2(2) |
| O(1)-S(1)-C(17)   | 109.6(3) |
| O(2)-S(1)-C(17)   | 109.7(3) |
| N(1)-S(1)-C(17)   | 102.7(3) |
| C(10)-N(1)-C(11)  | 108.5(5) |
| C(10)-N(1)-S(1)   | 122.4(4) |
| C(11)-N(1)-S(1)   | 127.5(4) |
| C(2)-C(1)-C(6)    | 119.6(6) |
| C(2)-C(1)-H(1A)   | 120.2    |
| C(6)-C(1)-H(1A)   | 120.2    |
| C(1)-C(2)-C(3)    | 121.8(7) |
| C(1)-C(2)-H(2A)   | 119.1    |
| C(3)-C(2)-H(2A)   | 119.1    |
| C(4)-C(3)-C(2)    | 117.1(6) |
| C(4)-C(3)-C(24)   | 121.2(8) |
| C(2)-C(3)-C(24)   | 121.7(9) |
| C(3)-C(4)-C(5)    | 123.1(7) |
| C(3)-C(4)-H(4A)   | 118.4    |
| C(5)-C(4)-H(4A)   | 118.4    |
| C(6)-C(5)-C(4)    | 120.0(7) |
| C(6)-C(5)-H(5A)   | 120.0    |
| C(4)-C(5)-H(5A)   | 120.0    |
| C(5)-C(6)-C(1)    | 118.3(5) |
| C(5)-C(6)-C(7)    | 120.6(6) |
| C(1)-C(6)-C(7)    | 120.8(5) |
| C(8)-C(7)-C(23)   | 115.3(5) |
| C(8)-C(7)-C(6)    | 121.2(5) |
| C(23)-C(7)-C(6)   | 113.4(5) |
| C(8)-C(7)-C(9)    | 60.3(4)  |
| C(23)-C(7)-C(9)   | 117.1(5) |
| C(6)-C(7)-C(9)    | 119.7(4) |
| C(7)-C(8)-C(9)    | 62.9(4)  |
| C(7)-C(8)-H(8A)   | 117.5    |
| C(9)-C(8)-H(8A)   | 117.5    |
| C(7)-C(8)-H(8B)   | 117.5    |
| C(9)-C(8)-H(8B)   | 117.5    |
| H(8A)-C(8)-H(8B)  | 114.5    |
| C(10)-C(9)-C(12)  | 106.6(5) |
| C(10)-C(9)-C(8)   | 119.7(5) |
| C(12)-C(9)-C(8)   | 124.1(5) |
| C(10)-C(9)-C(7)   | 119.1(5) |
| C(12)-C(9)-C(7)   | 123.8(4) |
| C(8)-C(9)-C(7)    | 56.9(4)  |
| O(5)-C(10)-N(1)   | 124.5(5) |
| O(5)-C(10)-C(9)   | 129.1(6) |
| N(1)-C(10)-C(9)   | 106.4(4) |
| C(16)-C(11)-C(12) | 121.8(6) |
| C(16)-C(11)-N(1)  | 129.3(6) |

|                     |           |
|---------------------|-----------|
| C(12)-C(11)-N(1)    | 108.8(5)  |
| C(13)-C(12)-C(11)   | 119.8(6)  |
| C(13)-C(12)-C(9)    | 131.7(6)  |
| C(11)-C(12)-C(9)    | 108.5(5)  |
| C(12)-C(13)-C(14)   | 118.3(7)  |
| C(12)-C(13)-H(13A)  | 120.9     |
| C(14)-C(13)-H(13A)  | 120.9     |
| C(15)-C(14)-C(13)   | 120.6(7)  |
| C(15)-C(14)-H(14A)  | 119.7     |
| C(13)-C(14)-H(14A)  | 119.7     |
| C(16)-C(15)-C(14)   | 121.1(7)  |
| C(16)-C(15)-H(15A)  | 119.4     |
| C(14)-C(15)-H(15A)  | 119.4     |
| C(15)-C(16)-C(11)   | 118.3(7)  |
| C(15)-C(16)-H(16A)  | 120.8     |
| C(11)-C(16)-H(16A)  | 120.8     |
| C(18)-C(17)-C(22)   | 119.9(6)  |
| C(18)-C(17)-S(1)    | 120.4(5)  |
| C(22)-C(17)-S(1)    | 119.6(5)  |
| C(17)-C(18)-C(19)   | 120.6(6)  |
| C(17)-C(18)-H(18A)  | 119.7     |
| C(19)-C(18)-H(18A)  | 119.7     |
| C(18)-C(19)-C(20)   | 118.0(6)  |
| C(18)-C(19)-H(19A)  | 121.0     |
| C(20)-C(19)-H(19A)  | 121.0     |
| C(21)-C(20)-C(19)   | 122.5(6)  |
| C(21)-C(20)-N(2)    | 119.3(6)  |
| C(19)-C(20)-N(2)    | 118.2(6)  |
| C(20)-C(21)-C(22)   | 118.7(6)  |
| C(20)-C(21)-H(21A)  | 120.6     |
| C(22)-C(21)-H(21A)  | 120.6     |
| C(21)-C(22)-C(17)   | 120.2(6)  |
| C(21)-C(22)-H(22A)  | 119.9     |
| C(17)-C(22)-H(22A)  | 119.9     |
| F(1)-C(23)-C(7)     | 110.3(5)  |
| F(1)-C(23)-H(23A)   | 109.6     |
| C(7)-C(23)-H(23A)   | 109.6     |
| F(1)-C(23)-H(23B)   | 109.6     |
| C(7)-C(23)-H(23B)   | 109.6     |
| H(23A)-C(23)-H(23B) | 108.1     |
| C(25)-C(24)-C(3)    | 118.0(8)  |
| C(25)-C(24)-H(24A)  | 107.8     |
| C(3)-C(24)-H(24A)   | 107.8     |
| C(25)-C(24)-H(24B)  | 107.8     |
| C(3)-C(24)-H(24B)   | 107.8     |
| H(24A)-C(24)-H(24B) | 107.1     |
| C(24)-C(25)-C(26)   | 126.9(12) |
| C(24)-C(25)-H(25A)  | 105.6     |

|                     |           |
|---------------------|-----------|
| C(26)-C(25)-H(25A)  | 105.6     |
| C(24)-C(25)-H(25B)  | 105.6     |
| C(26)-C(25)-H(25B)  | 105.6     |
| H(25A)-C(25)-H(25B) | 106.1     |
| C(27)-C(26)-C(25)   | 104.7(13) |
| C(27)-C(26)-H(26A)  | 110.8     |
| C(25)-C(26)-H(26A)  | 110.8     |
| C(27)-C(26)-H(26B)  | 110.8     |
| C(25)-C(26)-H(26B)  | 110.8     |
| H(26A)-C(26)-H(26B) | 108.9     |
| C(26)-C(27)-H(27A)  | 109.5     |
| C(26)-C(27)-H(27B)  | 109.5     |
| H(27A)-C(27)-H(27B) | 109.5     |
| C(26)-C(27)-H(27C)  | 109.5     |
| H(27A)-C(27)-H(27C) | 109.5     |
| H(27B)-C(27)-H(27C) | 109.5     |
| O(3)-N(2)-O(4)      | 122.7(8)  |
| O(3)-N(2)-C(20)     | 120.0(6)  |
| O(4)-N(2)-C(20)     | 117.3(7)  |

Symmetry transformations used to generate equivalent atoms:

**Table S9.** Anisotropic displacement parameters ( $\text{\AA}^2 \times 10^3$ ) for z.

The anisotropic displacement factor exponent takes the form:

$$-2 \pi^2 [ h^2 a^{*2} U_{11} + \dots + 2 h k a^* b^* U_{12} ]$$

|      | U11    | U22    | U33    | U23    | U13   | U12    |
|------|--------|--------|--------|--------|-------|--------|
| S(1) | 69(1)  | 63(1)  | 63(1)  | 7(1)   | 4(1)  | 9(1)   |
| O(1) | 93(3)  | 69(3)  | 76(3)  | -3(2)  | 8(2)  | 23(3)  |
| O(2) | 74(3)  | 73(3)  | 80(3)  | 25(2)  | 15(2) | -12(2) |
| O(3) | 134(5) | 206(8) | 134(5) | -88(5) | 64(4) | -62(5) |
| O(4) | 93(4)  | 188(8) | 156(5) | -59(5) | 40(4) | -47(5) |
| O(5) | 73(3)  | 89(3)  | 60(2)  | 11(2)  | 17(2) | 9(2)   |
| F(1) | 97(3)  | 86(3)  | 120(3) | 5(2)   | 45(2) | -11(2) |
| N(1) | 55(3)  | 68(3)  | 57(3)  | 7(2)   | 4(2)  | 7(3)   |
| C(1) | 69(4)  | 66(4)  | 57(3)  | -2(3)  | 3(3)  | 2(3)   |
| C(2) | 89(5)  | 106(6) | 63(4)  | -10(4) | 4(4)  | 11(5)  |
| C(3) | 74(4)  | 104(7) | 60(4)  | -3(4)  | 2(3)  | 6(4)   |
| C(4) | 79(5)  | 101(6) | 79(5)  | 29(4)  | -1(4) | 26(5)  |
| C(5) | 69(4)  | 66(4)  | 73(4)  | 13(3)  | 0(3)  | 14(4)  |
| C(6) | 58(3)  | 55(3)  | 54(3)  | -1(3)  | 9(2)  | -12(3) |

|       |         |         |         |         |        |        |
|-------|---------|---------|---------|---------|--------|--------|
| C(7)  | 55(3)   | 57(3)   | 54(3)   | -5(3)   | 6(3)   | 3(3)   |
| C(8)  | 83(4)   | 57(4)   | 62(3)   | 0(3)    | 2(3)   | 9(4)   |
| C(9)  | 54(3)   | 57(3)   | 51(3)   | -4(3)   | 3(2)   | 2(3)   |
| C(10) | 52(3)   | 62(4)   | 46(3)   | 0(3)    | 4(3)   | -1(3)  |
| C(11) | 52(3)   | 69(4)   | 55(3)   | 1(3)    | 7(3)   | -4(3)  |
| C(12) | 58(3)   | 71(5)   | 47(3)   | 4(3)    | 4(3)   | -9(3)  |
| C(13) | 74(4)   | 71(5)   | 63(3)   | 14(3)   | 12(3)  | -10(4) |
| C(14) | 85(5)   | 123(7)  | 68(4)   | 9(5)    | 29(4)  | -8(5)  |
| C(15) | 75(5)   | 146(8)  | 73(4)   | 5(5)    | 30(4)  | 14(6)  |
| C(16) | 63(4)   | 106(6)  | 79(4)   | 9(4)    | 22(3)  | 18(4)  |
| C(17) | 52(3)   | 65(4)   | 52(3)   | 6(3)    | 1(3)   | 13(3)  |
| C(18) | 56(4)   | 91(5)   | 54(3)   | 2(3)    | 13(3)  | -11(4) |
| C(19) | 59(4)   | 105(5)  | 58(3)   | -16(4)  | 16(3)  | 9(4)   |
| C(20) | 51(4)   | 86(5)   | 66(4)   | -3(3)   | 7(3)   | -2(3)  |
| C(21) | 50(4)   | 119(7)  | 82(4)   | -17(4)  | 26(3)  | -5(4)  |
| C(22) | 53(4)   | 106(6)  | 69(4)   | -14(4)  | 20(3)  | 6(4)   |
| C(23) | 60(4)   | 79(5)   | 76(4)   | -5(3)   | 15(3)  | 18(3)  |
| C(24) | 124(7)  | 300(18) | 69(5)   | 6(8)    | -3(5)  | 57(10) |
| C(25) | 245(13) | 450(20) | 84(7)   | -4(13)  | -5(8)  | 64(17) |
| C(26) | 250(17) | 420(30) | 126(10) | -23(15) | -3(11) | 40(20) |
| C(27) | 290(20) | 420(40) | 182(15) | 30(20)  | 23(13) | 40(30) |
| N(2)  | 64(4)   | 149(7)  | 84(4)   | -12(5)  | 24(3)  | -21(4) |

**Table S10.** Hydrogen coordinates ( $\times 10^4$ ) and isotropic displacement parameters ( $\text{\AA}^2 \times 10^3$ ) for z.

|        | x    | y     | z    | U(eq) |
|--------|------|-------|------|-------|
| H(1A)  | 7075 | 2637  | 4177 | 80    |
| H(2A)  | 7833 | 2916  | 5487 | 107   |
| H(4A)  | 9390 | -3252 | 5419 | 109   |
| H(5A)  | 8582 | -3754 | 4128 | 88    |
| H(8A)  | 6584 | -4263 | 3103 | 85    |
| H(8B)  | 6792 | -3502 | 2271 | 85    |
| H(13A) | 5713 | -2381 | 4151 | 85    |
| H(14A) | 4370 | -1032 | 4655 | 108   |
| H(15A) | 3306 | 2146  | 4065 | 115   |
| H(16A) | 3456 | 3832  | 2917 | 99    |
| H(18A) | 4333 | 1357  | 171  | 81    |
| H(19A) | 3262 | -1649 | -559 | 89    |

|        |       |       |      |     |
|--------|-------|-------|------|-----|
| H(21A) | 1175  | -322  | 638  | 98  |
| H(22A) | 2265  | 2598  | 1381 | 90  |
| H(23A) | 8674  | -528  | 2828 | 87  |
| H(23B) | 7710  | 116   | 2137 | 87  |
| H(24A) | 9465  | -1534 | 6672 | 204 |
| H(24B) | 9905  | 1030  | 6500 | 204 |
| H(25A) | 8165  | 227   | 6969 | 321 |
| H(25B) | 8433  | 2800  | 6681 | 321 |
| H(26A) | 9625  | 3625  | 7838 | 330 |
| H(26B) | 8659  | 2500  | 8066 | 330 |
| H(27A) | 10137 | 410   | 8725 | 457 |
| H(27B) | 10364 | -274  | 7930 | 457 |
| H(27C) | 9400  | -1412 | 8147 | 457 |

**Table S11.** Torsion angles [deg] for z.

|                       |           |
|-----------------------|-----------|
| O(1)-S(1)-N(1)-C(10)  | -168.7(4) |
| O(2)-S(1)-N(1)-C(10)  | -39.0(5)  |
| C(17)-S(1)-N(1)-C(10) | 76.5(5)   |
| O(1)-S(1)-N(1)-C(11)  | 27.6(5)   |
| O(2)-S(1)-N(1)-C(11)  | 157.4(5)  |
| C(17)-S(1)-N(1)-C(11) | -87.1(5)  |
| C(6)-C(1)-C(2)-C(3)   | 2.0(10)   |
| C(1)-C(2)-C(3)-C(4)   | -0.9(11)  |
| C(1)-C(2)-C(3)-C(24)  | 176.6(8)  |
| C(2)-C(3)-C(4)-C(5)   | -1.2(12)  |
| C(24)-C(3)-C(4)-C(5)  | -178.7(8) |
| C(3)-C(4)-C(5)-C(6)   | 2.2(11)   |
| C(4)-C(5)-C(6)-C(1)   | -1.0(9)   |
| C(4)-C(5)-C(6)-C(7)   | 173.1(6)  |
| C(2)-C(1)-C(6)-C(5)   | -1.0(9)   |
| C(2)-C(1)-C(6)-C(7)   | -175.1(6) |
| C(5)-C(6)-C(7)-C(8)   | 61.1(7)   |
| C(1)-C(6)-C(7)-C(8)   | -124.9(6) |
| C(5)-C(6)-C(7)-C(23)  | -82.8(7)  |
| C(1)-C(6)-C(7)-C(23)  | 91.2(7)   |
| C(5)-C(6)-C(7)-C(9)   | 132.3(6)  |
| C(1)-C(6)-C(7)-C(9)   | -53.7(8)  |
| C(23)-C(7)-C(8)-C(9)  | -108.0(5) |
| C(6)-C(7)-C(8)-C(9)   | 108.7(6)  |
| C(7)-C(8)-C(9)-C(10)  | 107.3(6)  |
| C(7)-C(8)-C(9)-C(12)  | -111.1(5) |
| C(8)-C(7)-C(9)-C(10)  | -108.3(6) |
| C(23)-C(7)-C(9)-C(10) | -3.2(8)   |
| C(6)-C(7)-C(9)-C(10)  | 140.5(6)  |

|                         |           |
|-------------------------|-----------|
| C(8)-C(7)-C(9)-C(12)    | 111.7(7)  |
| C(23)-C(7)-C(9)-C(12)   | -143.2(6) |
| C(6)-C(7)-C(9)-C(12)    | 0.5(10)   |
| C(23)-C(7)-C(9)-C(8)    | 105.1(6)  |
| C(6)-C(7)-C(9)-C(8)     | -111.2(7) |
| C(11)-N(1)-C(10)-O(5)   | 169.1(6)  |
| S(1)-N(1)-C(10)-O(5)    | 2.8(8)    |
| C(11)-N(1)-C(10)-C(9)   | -10.0(6)  |
| S(1)-N(1)-C(10)-C(9)    | -176.4(4) |
| C(12)-C(9)-C(10)-O(5)   | -167.8(6) |
| C(8)-C(9)-C(10)-O(5)    | -20.2(9)  |
| C(7)-C(9)-C(10)-O(5)    | 46.1(9)   |
| C(12)-C(9)-C(10)-N(1)   | 11.3(6)   |
| C(8)-C(9)-C(10)-N(1)    | 158.9(5)  |
| C(7)-C(9)-C(10)-N(1)    | -134.8(5) |
| C(10)-N(1)-C(11)-C(16)  | -173.5(6) |
| S(1)-N(1)-C(11)-C(16)   | -8.0(9)   |
| C(10)-N(1)-C(11)-C(12)  | 4.9(6)    |
| S(1)-N(1)-C(11)-C(12)   | 170.4(4)  |
| C(16)-C(11)-C(12)-C(13) | 1.1(9)    |
| N(1)-C(11)-C(12)-C(13)  | -177.4(5) |
| C(16)-C(11)-C(12)-C(9)  | -179.1(6) |
| N(1)-C(11)-C(12)-C(9)   | 2.4(6)    |
| C(10)-C(9)-C(12)-C(13)  | 171.2(6)  |
| C(8)-C(9)-C(12)-C(13)   | 25.5(9)   |
| C(7)-C(9)-C(12)-C(13)   | -44.6(10) |
| C(10)-C(9)-C(12)-C(11)  | -8.5(6)   |
| C(8)-C(9)-C(12)-C(11)   | -154.3(5) |
| C(7)-C(9)-C(12)-C(11)   | 135.6(6)  |
| C(11)-C(12)-C(13)-C(14) | -0.5(9)   |
| C(9)-C(12)-C(13)-C(14)  | 179.7(6)  |
| C(12)-C(13)-C(14)-C(15) | -1.3(11)  |
| C(13)-C(14)-C(15)-C(16) | 2.6(12)   |
| C(14)-C(15)-C(16)-C(11) | -2.1(12)  |
| C(12)-C(11)-C(16)-C(15) | 0.2(10)   |
| N(1)-C(11)-C(16)-C(15)  | 178.4(6)  |
| O(1)-S(1)-C(17)-C(18)   | 161.1(5)  |
| O(2)-S(1)-C(17)-C(18)   | 26.5(6)   |
| N(1)-S(1)-C(17)-C(18)   | -87.2(5)  |
| O(1)-S(1)-C(17)-C(22)   | -22.2(6)  |
| O(2)-S(1)-C(17)-C(22)   | -156.7(5) |
| N(1)-S(1)-C(17)-C(22)   | 89.6(5)   |
| C(22)-C(17)-C(18)-C(19) | -1.3(9)   |
| S(1)-C(17)-C(18)-C(19)  | 175.4(5)  |
| C(17)-C(18)-C(19)-C(20) | 0.6(10)   |
| C(18)-C(19)-C(20)-C(21) | 0.9(10)   |
| C(18)-C(19)-C(20)-N(2)  | -177.2(6) |
| C(19)-C(20)-C(21)-C(22) | -1.7(11)  |



|                         |            |
|-------------------------|------------|
| N(2)-C(20)-C(21)-C(22)  | 176.3(6)   |
| C(20)-C(21)-C(22)-C(17) | 1.0(11)    |
| C(18)-C(17)-C(22)-C(21) | 0.5(9)     |
| S(1)-C(17)-C(22)-C(21)  | -176.3(5)  |
| C(8)-C(7)-C(23)-F(1)    | 152.1(5)   |
| C(6)-C(7)-C(23)-F(1)    | -61.8(7)   |
| C(9)-C(7)-C(23)-F(1)    | 84.1(7)    |
| C(4)-C(3)-C(24)-C(25)   | -150.5(13) |
| C(2)-C(3)-C(24)-C(25)   | 32.1(18)   |
| C(3)-C(24)-C(25)-C(26)  | -170.2(19) |
| C(24)-C(25)-C(26)-C(27) | -45(3)     |
| C(21)-C(20)-N(2)-O(3)   | -178.9(8)  |
| C(19)-C(20)-N(2)-O(3)   | -0.8(11)   |
| C(21)-C(20)-N(2)-O(4)   | -1.2(10)   |
| C(19)-C(20)-N(2)-O(4)   | 176.9(7)   |

---

Symmetry transformations used to generate equivalent atoms:

**Table S12.** Hydrogen bonds for z [A and deg.].

---

| D-H...A | d(D-H) | d(H...A) | d(D...A) | <(DHA) |
|---------|--------|----------|----------|--------|
|---------|--------|----------|----------|--------|

## Part VIII Single-Crystal X-ray Crystallography of **7d** (CCDC: 1832274)

Data intensity of **7d** was collected using a Bruker SMART APEX II (Mo radiation) at 296 K in a nitrogen stream. The X-ray condition of was 50 kV  $\times$  30 mA. Data collection and reduction were done by using the Bruker ApexII software package. The structures were solved by direct methods and refined by full-matrix least-squares on  $F^2$  with anisotropic displacement parameters for non-H atoms using SHELX-97. Hydrogen atoms were added at their geometrically idea positions and refined isotropically. Crystal data for **7d**: C<sub>18</sub>H<sub>16</sub>BrFO<sub>2</sub>,  $T = 296(2)$  K, monoclinic, space group  $P1$ ,  $a = 6.6841(6)$  Å,  $b = 8.7074(8)$  Å,  $c = 14.4482(13)$  Å,  $\alpha = 87.391(3)$  deg,  $\beta = 81.591(2)$  deg,  $\gamma = 78.532(3)$  deg,  $V = 815.14(13)$  Å<sup>3</sup>.  $Z = 2$ ,  $d_{\text{calc}} = 1.480$  mg/m<sup>3</sup>. Total number of reflections 9422 ( $R_{\text{int}} = 0.0302$ ),  $R_1 = 0.0577$ ,  $wR_2 = 0.1463$  (all data), GOF = 1.065, and 398 parameters.

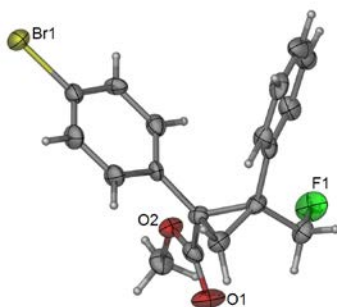

**Table S13.** Crystal data and structure refinement for **z**.

|                             |                                                                                                                                            |
|-----------------------------|--------------------------------------------------------------------------------------------------------------------------------------------|
| Identification code         | <b>z</b>                                                                                                                                   |
| Empirical formula           | C <sub>18</sub> H <sub>16</sub> BrFO <sub>2</sub>                                                                                          |
| Formula weight              | 363.22                                                                                                                                     |
| Temperature                 | 296(2) K                                                                                                                                   |
| Wavelength                  | 0.71073 Å                                                                                                                                  |
| Crystal system, space group | Triclinic, $P1$                                                                                                                            |
| Unit cell dimensions        | $a = 6.6841(6)$ Å    alpha = 87.391(3) deg.<br>$b = 8.7074(8)$ Å    beta = 81.591(2) deg.<br>$c = 14.4482(13)$ Å    gamma = 78.532(3) deg. |
| Volume                      | 815.14(13) Å <sup>3</sup>                                                                                                                  |
| $Z$ , Calculated density    | 2, 1.480 mg/m <sup>3</sup>                                                                                                                 |
| Absorption coefficient      | 2.535 mm <sup>-1</sup>                                                                                                                     |
| $F(000)$                    | 368                                                                                                                                        |

|                                      |                                         |
|--------------------------------------|-----------------------------------------|
| Crystal size                         | 0.31 × 0.23 × 0.12 mm                   |
| Theta range for data collection      | 1.42 to 25.01 deg.                      |
| Limiting indices                     | -7 ≤ h ≤ 7, -10 ≤ k ≤ 10, -17 ≤ l ≤ 17  |
| Reflections collected / unique       | 9422/4504 [ $R_{\text{int}} = 0.0302$ ] |
| Completeness to theta = 25.01        | 99.2%                                   |
| Absorption correction                | Semi-empirical from equivalents         |
| Max. and min. transmission           | 0.7507 and 0.5070                       |
| Refinement method                    | Full-matrix least-squares on $F^2$      |
| Data / restraints / parameters       | 4504 / 3 / 398                          |
| Goodness-of-fit on $F^2$             | 1.065                                   |
| Final R indices [ $I > 2\sigma(I)$ ] | $R_1 = 0.0518$ , $wR_2 = 0.1409$        |
| R indices (all data)                 | $R_1 = 0.0577$ , $wR_2 = 0.1463$        |
| Absolute structure parameter         | 0.041(15)                               |
| Largest diff. peak and hole          | 1.594 and -0.535 e.Å <sup>-3</sup>      |

**Table S14.** Atomic coordinates ( $\times 10^4$ ) and equivalent isotropic displacement parameters ( $\text{\AA}^2 \times 10^3$ ) for z.

U(eq) is defined as one third of the trace of the orthogonalized U<sub>ij</sub> tensor.

|       | x        | y        | z       | U(eq) |
|-------|----------|----------|---------|-------|
| Br(2) | 8680(1)  | 6004(1)  | 4650(1) | 38(1) |
| O(3)  | -1148(9) | 7000(8)  | 8701(5) | 56(2) |
| O(4)  | 2241(9)  | 5992(6)  | 8523(3) | 35(1) |
| F(2)  | -1350(8) | 11884(5) | 8997(3) | 44(1) |
| C(19) | 2710(12) | 7549(9)  | 5971(5) | 31(2) |
| C(20) | 4418(12) | 7052(8)  | 5303(5) | 29(2) |
| C(21) | 6358(13) | 6734(9)  | 5585(5) | 29(2) |
| C(22) | 6670(12) | 6880(8)  | 6483(5) | 29(2) |
| C(23) | 4971(11) | 7382(8)  | 7147(5) | 24(2) |
| C(24) | 3019(11) | 7742(8)  | 6900(5) | 25(2) |
| C(25) | 1124(10) | 8266(8)  | 7622(4) | 25(1) |
| C(26) | -695(10) | 9384(8)  | 7355(5) | 28(1) |

|       |           |           |         |       |
|-------|-----------|-----------|---------|-------|
| C(27) | 635(10)   | 9997(8)   | 7923(5) | 26(1) |
| C(29) | 3762(11)  | 11208(9)  | 7804(5) | 28(2) |
| C(30) | 4969(13)  | 12281(9)  | 7429(6) | 36(2) |
| C(31) | 4378(16)  | 13280(11) | 6724(7) | 41(2) |
| C(32) | 2504(15)  | 13189(11) | 6369(7) | 45(2) |
| C(33) | 1337(13)  | 12119(9)  | 6752(5) | 33(2) |
| C(34) | -232(15)  | 10365(11) | 8939(6) | 35(2) |
| C(35) | 591(12)   | 7051(9)   | 8335(5) | 30(2) |
| C(36) | 1781(16)  | 4694(9)   | 9136(5) | 47(2) |
| C(38) | 1946(13)  | 11112(9)  | 7485(5) | 29(2) |
| Br(1) | -2689(1)  | 10961(1)  | 4993(1) | 41(1) |
| F(1)  | 7554(7)   | 6752(7)   | 1124(4) | 57(1) |
| O(1)  | 4673(10)  | 9784(7)   | 39(3)   | 46(1) |
| O(2)  | 4625(9)   | 10662(6)  | 1469(3) | 29(1) |
| C(1)  | -541(11)  | 9512(9)   | 2278(5) | 32(2) |
| C(2)  | -1778(12) | 10078(9)  | 3087(5) | 33(2) |
| C(3)  | -970(12)  | 10207(9)  | 3874(5) | 29(2) |
| C(4)  | 1185(11)  | 9765(9)   | 3895(5) | 27(2) |
| C(5)  | 2398(12)  | 9208(9)   | 3081(6) | 32(2) |
| C(6)  | 1590(11)  | 9080(8)   | 2258(5) | 21(1) |
| C(7)  | 2956(10)  | 8549(8)   | 1354(4) | 25(1) |
| C(8)  | 2203(11)  | 7546(8)   | 719(5)  | 29(2) |
| C(9)  | 3914(11)  | 6793(8)   | 1236(5) | 28(2) |
| C(10) | 3599(12)  | 5690(9)   | 2062(5) | 25(2) |
| C(11) | 1908(12)  | 4894(9)   | 2137(5) | 28(2) |
| C(12) | 1740(14)  | 3795(10)  | 2864(7) | 36(2) |
| C(13) | 3116(15)  | 3471(10)  | 3473(5) | 41(2) |
| C(14) | 4724(13)  | 4257(9)   | 3402(5) | 37(2) |
| C(15) | 4946(13)  | 5363(9)   | 2690(5) | 33(2) |
| C(16) | 5995(12)  | 6396(10)  | 639(6)  | 30(2) |
| C(17) | 4136(11)  | 9713(8)   | 867(5)  | 29(2) |
| C(18) | 5677(14)  | 11884(9)  | 1046(6) | 40(2) |

**Table S15.** Bond lengths [ $\text{\AA}$ ] and angles [deg] for *z*.

|              |           |
|--------------|-----------|
| Br(2)-C(21)  | 1.926(7)  |
| O(3)-C(35)   | 1.213(9)  |
| O(4)-C(35)   | 1.342(10) |
| O(4)-C(36)   | 1.457(9)  |
| F(2)-C(34)   | 1.383(11) |
| C(19)-C(20)  | 1.393(10) |
| C(19)-C(24)  | 1.410(10) |
| C(19)-H(19A) | 0.9300    |
| C(20)-C(21)  | 1.388(12) |
| C(20)-H(20A) | 0.9300    |
| C(21)-C(22)  | 1.359(11) |

|              |           |
|--------------|-----------|
| C(22)-C(23)  | 1.387(10) |
| C(22)-H(22A) | 0.9300    |
| C(23)-C(24)  | 1.375(11) |
| C(23)-H(23A) | 0.9300    |
| C(24)-C(25)  | 1.526(10) |
| C(25)-C(26)  | 1.486(10) |
| C(25)-C(35)  | 1.500(10) |
| C(25)-C(27)  | 1.546(10) |
| C(26)-C(27)  | 1.480(10) |
| C(26)-H(26A) | 0.9700    |
| C(26)-H(26B) | 0.9700    |
| C(27)-C(38)  | 1.494(9)  |
| C(27)-C(34)  | 1.521(11) |
| C(29)-C(38)  | 1.379(11) |
| C(29)-C(30)  | 1.394(10) |
| C(29)-H(29A) | 0.9300    |
| C(30)-C(31)  | 1.360(13) |
| C(30)-H(30A) | 0.9300    |
| C(31)-C(32)  | 1.439(15) |
| C(31)-H(31A) | 0.9300    |
| C(32)-C(33)  | 1.377(12) |
| C(32)-H(32A) | 0.9300    |
| C(33)-C(38)  | 1.399(11) |
| C(33)-H(33A) | 0.9300    |
| C(34)-H(34A) | 0.9700    |
| C(34)-H(34B) | 0.9700    |
| C(36)-H(36A) | 0.9600    |
| C(36)-H(36B) | 0.9600    |
| C(36)-H(36C) | 0.9600    |
| Br(1)-C(3)   | 1.902(8)  |
| F(1)-C(16)   | 1.427(9)  |
| O(1)-C(17)   | 1.200(8)  |
| O(2)-C(17)   | 1.343(9)  |
| O(2)-C(18)   | 1.453(9)  |
| C(1)-C(2)    | 1.379(10) |
| C(1)-C(6)    | 1.395(10) |
| C(1)-H(1A)   | 0.9300    |
| C(2)-C(3)    | 1.347(11) |
| C(2)-H(2A)   | 0.9300    |
| C(3)-C(4)    | 1.419(11) |
| C(4)-C(5)    | 1.375(11) |
| C(4)-H(4A)   | 0.9300    |
| C(5)-C(6)    | 1.395(11) |
| C(5)-H(5A)   | 0.9300    |
| C(6)-C(7)    | 1.514(9)  |
| C(7)-C(17)   | 1.496(9)  |
| C(7)-C(8)    | 1.497(10) |
| C(7)-C(9)    | 1.543(10) |

|              |           |
|--------------|-----------|
| C(8)-C(9)    | 1.484(10) |
| C(8)-H(8A)   | 0.9700    |
| C(8)-H(8B)   | 0.9700    |
| C(9)-C(16)   | 1.510(11) |
| C(9)-C(10)   | 1.515(10) |
| C(10)-C(15)  | 1.352(11) |
| C(10)-C(11)  | 1.428(11) |
| C(11)-C(12)  | 1.395(12) |
| C(11)-H(11A) | 0.9300    |
| C(12)-C(13)  | 1.346(13) |
| C(12)-H(12A) | 0.9300    |
| C(13)-C(14)  | 1.374(12) |
| C(13)-H(13A) | 0.9300    |
| C(14)-C(15)  | 1.389(11) |
| C(14)-H(14A) | 0.9300    |
| C(15)-H(15A) | 0.9300    |
| C(16)-H(16A) | 0.9700    |
| C(16)-H(16B) | 0.9700    |
| C(18)-H(18A) | 0.9600    |
| C(18)-H(18B) | 0.9600    |
| C(18)-H(18C) | 0.9600    |

|                    |          |
|--------------------|----------|
| C(35)-O(4)-C(36)   | 115.1(6) |
| C(20)-C(19)-C(24)  | 118.9(7) |
| C(20)-C(19)-H(19A) | 120.5    |
| C(24)-C(19)-H(19A) | 120.5    |
| C(21)-C(20)-C(19)  | 118.5(7) |
| C(21)-C(20)-H(20A) | 120.8    |
| C(19)-C(20)-H(20A) | 120.8    |
| C(22)-C(21)-C(20)  | 123.0(7) |
| C(22)-C(21)-Br(2)  | 119.5(6) |
| C(20)-C(21)-Br(2)  | 117.4(6) |
| C(21)-C(22)-C(23)  | 118.5(8) |
| C(21)-C(22)-H(22A) | 120.7    |
| C(23)-C(22)-H(22A) | 120.7    |
| C(24)-C(23)-C(22)  | 120.7(7) |
| C(24)-C(23)-H(23A) | 119.7    |
| C(22)-C(23)-H(23A) | 119.7    |
| C(23)-C(24)-C(19)  | 120.3(7) |
| C(23)-C(24)-C(25)  | 121.6(6) |
| C(19)-C(24)-C(25)  | 118.0(7) |
| C(26)-C(25)-C(35)  | 114.0(6) |
| C(26)-C(25)-C(24)  | 120.5(6) |
| C(35)-C(25)-C(24)  | 116.0(6) |
| C(26)-C(25)-C(27)  | 58.4(5)  |
| C(35)-C(25)-C(27)  | 118.1(6) |
| C(24)-C(25)-C(27)  | 117.7(5) |
| C(27)-C(26)-C(25)  | 62.8(4)  |

|                     |          |
|---------------------|----------|
| C(27)-C(26)-H(26A)  | 117.5    |
| C(25)-C(26)-H(26A)  | 117.5    |
| C(27)-C(26)-H(26B)  | 117.5    |
| C(25)-C(26)-H(26B)  | 117.5    |
| H(26A)-C(26)-H(26B) | 114.6    |
| C(26)-C(27)-C(38)   | 119.4(6) |
| C(26)-C(27)-C(34)   | 117.1(6) |
| C(38)-C(27)-C(34)   | 112.9(6) |
| C(26)-C(27)-C(25)   | 58.8(4)  |
| C(38)-C(27)-C(25)   | 120.2(6) |
| C(34)-C(27)-C(25)   | 118.3(6) |
| C(38)-C(29)-C(30)   | 122.1(7) |
| C(38)-C(29)-H(29A)  | 119.0    |
| C(30)-C(29)-H(29A)  | 119.0    |
| C(31)-C(30)-C(29)   | 120.4(8) |
| C(31)-C(30)-H(30A)  | 119.8    |
| C(29)-C(30)-H(30A)  | 119.8    |
| C(30)-C(31)-C(32)   | 118.6(8) |
| C(30)-C(31)-H(31A)  | 120.7    |
| C(32)-C(31)-H(31A)  | 120.7    |
| C(33)-C(32)-C(31)   | 119.9(8) |
| C(33)-C(32)-H(32A)  | 120.0    |
| C(31)-C(32)-H(32A)  | 120.0    |
| C(32)-C(33)-C(38)   | 120.9(8) |
| C(32)-C(33)-H(33A)  | 119.5    |
| C(38)-C(33)-H(33A)  | 119.5    |
| F(2)-C(34)-C(27)    | 109.4(7) |
| F(2)-C(34)-H(34A)   | 109.8    |
| C(27)-C(34)-H(34A)  | 109.8    |
| F(2)-C(34)-H(34B)   | 109.8    |
| C(27)-C(34)-H(34B)  | 109.8    |
| H(34A)-C(34)-H(34B) | 108.2    |
| O(3)-C(35)-O(4)     | 122.6(7) |
| O(3)-C(35)-C(25)    | 124.2(8) |
| O(4)-C(35)-C(25)    | 113.1(6) |
| O(4)-C(36)-H(36A)   | 109.5    |
| O(4)-C(36)-H(36B)   | 109.5    |
| H(36A)-C(36)-H(36B) | 109.5    |
| O(4)-C(36)-H(36C)   | 109.5    |
| H(36A)-C(36)-H(36C) | 109.5    |
| H(36B)-C(36)-H(36C) | 109.5    |
| C(29)-C(38)-C(33)   | 118.1(7) |
| C(29)-C(38)-C(27)   | 121.2(7) |
| C(33)-C(38)-C(27)   | 120.8(7) |
| C(17)-O(2)-C(18)    | 115.5(6) |
| C(2)-C(1)-C(6)      | 120.2(7) |
| C(2)-C(1)-H(1A)     | 119.9    |
| C(6)-C(1)-H(1A)     | 119.9    |

|                    |          |
|--------------------|----------|
| C(3)-C(2)-C(1)     | 121.1(7) |
| C(3)-C(2)-H(2A)    | 119.4    |
| C(1)-C(2)-H(2A)    | 119.4    |
| C(2)-C(3)-C(4)     | 120.9(7) |
| C(2)-C(3)-Br(1)    | 120.9(6) |
| C(4)-C(3)-Br(1)    | 118.2(6) |
| C(5)-C(4)-C(3)     | 117.3(7) |
| C(5)-C(4)-H(4A)    | 121.4    |
| C(3)-C(4)-H(4A)    | 121.4    |
| C(4)-C(5)-C(6)     | 122.6(7) |
| C(4)-C(5)-H(5A)    | 118.7    |
| C(6)-C(5)-H(5A)    | 118.7    |
| C(5)-C(6)-C(1)     | 117.9(7) |
| C(5)-C(6)-C(7)     | 121.9(6) |
| C(1)-C(6)-C(7)     | 120.1(6) |
| C(17)-C(7)-C(8)    | 114.9(6) |
| C(17)-C(7)-C(6)    | 116.0(6) |
| C(8)-C(7)-C(6)     | 118.3(6) |
| C(17)-C(7)-C(9)    | 117.9(6) |
| C(8)-C(7)-C(9)     | 58.4(5)  |
| C(6)-C(7)-C(9)     | 118.9(5) |
| C(9)-C(8)-C(7)     | 62.3(5)  |
| C(9)-C(8)-H(8A)    | 117.5    |
| C(7)-C(8)-H(8A)    | 117.5    |
| C(9)-C(8)-H(8B)    | 117.5    |
| C(7)-C(8)-H(8B)    | 117.5    |
| H(8A)-C(8)-H(8B)   | 114.6    |
| C(8)-C(9)-C(16)    | 114.7(6) |
| C(8)-C(9)-C(10)    | 122.2(6) |
| C(16)-C(9)-C(10)   | 114.6(7) |
| C(8)-C(9)-C(7)     | 59.2(5)  |
| C(16)-C(9)-C(7)    | 116.7(6) |
| C(10)-C(9)-C(7)    | 118.4(6) |
| C(15)-C(10)-C(11)  | 119.4(7) |
| C(15)-C(10)-C(9)   | 121.9(7) |
| C(11)-C(10)-C(9)   | 118.6(7) |
| C(12)-C(11)-C(10)  | 117.6(7) |
| C(12)-C(11)-H(11A) | 121.2    |
| C(10)-C(11)-H(11A) | 121.2    |
| C(13)-C(12)-C(11)  | 122.1(8) |
| C(13)-C(12)-H(12A) | 119.0    |
| C(11)-C(12)-H(12A) | 119.0    |
| C(12)-C(13)-C(14)  | 120.0(7) |
| C(12)-C(13)-H(13A) | 120.0    |
| C(14)-C(13)-H(13A) | 120.0    |
| C(13)-C(14)-C(15)  | 119.8(8) |
| C(13)-C(14)-H(14A) | 120.1    |
| C(15)-C(14)-H(14A) | 120.1    |



|                     |          |
|---------------------|----------|
| C(10)-C(15)-C(14)   | 121.2(8) |
| C(10)-C(15)-H(15A)  | 119.4    |
| C(14)-C(15)-H(15A)  | 119.4    |
| F(1)-C(16)-C(9)     | 110.1(6) |
| F(1)-C(16)-H(16A)   | 109.6    |
| C(9)-C(16)-H(16A)   | 109.6    |
| F(1)-C(16)-H(16B)   | 109.6    |
| C(9)-C(16)-H(16B)   | 109.6    |
| H(16A)-C(16)-H(16B) | 108.2    |
| O(1)-C(17)-O(2)     | 122.4(6) |
| O(1)-C(17)-C(7)     | 125.3(7) |
| O(2)-C(17)-C(7)     | 112.2(6) |
| O(2)-C(18)-H(18A)   | 109.5    |
| O(2)-C(18)-H(18B)   | 109.5    |
| H(18A)-C(18)-H(18B) | 109.5    |
| O(2)-C(18)-H(18C)   | 109.5    |
| H(18A)-C(18)-H(18C) | 109.5    |
| H(18B)-C(18)-H(18C) | 109.5    |

Symmetry transformations used to generate equivalent atoms:

**Table S16.** Anisotropic displacement parameters ( $\text{\AA}^2 \times 10^3$ ) for z.

The anisotropic displacement factor exponent takes the form:

$$-2 \pi^2 [ h^2 a^{*2} U_{11} + \dots + 2 h k a^* b^* U_{12} ]$$

|       | U11   | U22   | U33   | U23    | U13   | U12    |
|-------|-------|-------|-------|--------|-------|--------|
| Br(2) | 25(1) | 49(1) | 38(1) | -10(1) | 7(1)  | -7(1)  |
| O(3)  | 32(4) | 58(4) | 72(4) | 12(3)  | 16(3) | -13(3) |
| O(4)  | 38(3) | 35(3) | 31(3) | 8(2)   | 0(2)  | -9(2)  |
| F(2)  | 45(3) | 42(3) | 40(2) | -11(2) | 6(2)  | -1(2)  |
| C(19) | 28(4) | 37(4) | 27(3) | 0(3)   | -4(3) | -8(3)  |
| C(20) | 31(4) | 32(4) | 23(3) | -1(3)  | -4(3) | -5(3)  |
| C(21) | 32(5) | 23(4) | 30(4) | -1(3)  | 8(3)  | -9(3)  |
| C(22) | 18(4) | 30(4) | 39(4) | -2(3)  | -2(3) | -8(3)  |
| C(23) | 20(4) | 23(4) | 30(4) | -3(3)  | -2(3) | -6(3)  |
| C(24) | 23(4) | 23(3) | 28(4) | -5(3)  | 0(3)  | -5(3)  |
| C(25) | 19(4) | 32(4) | 26(3) | -3(3)  | -2(3) | -7(3)  |
| C(26) | 17(4) | 35(4) | 31(3) | -4(3)  | -5(3) | -4(3)  |
| C(27) | 12(3) | 26(3) | 38(4) | 5(3)   | 0(3)  | 0(3)   |
| C(29) | 22(4) | 31(4) | 31(3) | -2(3)  | -3(3) | -10(3) |
| C(30) | 21(4) | 32(4) | 52(5) | -11(3) | 2(4)  | -7(3)  |

|       |       |        |       |       |        |        |
|-------|-------|--------|-------|-------|--------|--------|
| C(31) | 45(6) | 39(5)  | 40(5) | -3(4) | 8(4)   | -19(4) |
| C(32) | 47(6) | 37(5)  | 50(5) | 13(4) | -5(4)  | -8(4)  |
| C(33) | 36(5) | 34(4)  | 31(4) | 1(3)  | -9(3)  | -10(3) |
| C(34) | 35(5) | 39(5)  | 31(4) | 0(3)  | 4(4)   | -14(4) |
| C(35) | 29(5) | 33(4)  | 30(3) | -8(3) | 4(3)   | -13(3) |
| C(36) | 76(7) | 28(4)  | 34(4) | 3(3)  | 2(4)   | -11(4) |
| C(38) | 29(4) | 28(4)  | 31(4) | -2(3) | 6(3)   | -10(3) |
| Br(1) | 38(1) | 50(1)  | 29(1) | 0(1)  | 3(1)   | 3(1)   |
| F(1)  | 11(2) | 103(5) | 58(3) | 2(3)  | -5(2)  | -17(2) |
| O(1)  | 63(4) | 59(4)  | 25(3) | 4(2)  | -5(2)  | -34(3) |
| O(2)  | 34(3) | 32(3)  | 26(2) | -1(2) | -1(2)  | -18(2) |
| C(1)  | 22(4) | 38(4)  | 34(4) | 2(3)  | -7(3)  | -2(3)  |
| C(2)  | 19(4) | 40(4)  | 40(4) | 0(3)  | -5(3)  | -2(3)  |
| C(3)  | 24(4) | 29(4)  | 31(4) | 5(3)  | -2(3)  | -1(3)  |
| C(4)  | 19(4) | 43(4)  | 22(3) | 7(3)  | -7(3)  | -10(3) |
| C(5)  | 25(4) | 29(4)  | 39(4) | 5(3)  | 0(3)   | -3(3)  |
| C(6)  | 16(4) | 19(3)  | 28(3) | -1(3) | -5(3)  | 0(3)   |
| C(7)  | 19(4) | 33(4)  | 24(3) | 3(3)  | 1(3)   | -8(3)  |
| C(8)  | 28(4) | 33(4)  | 29(3) | -3(3) | -3(3)  | -11(3) |
| C(9)  | 25(4) | 31(4)  | 26(3) | -1(3) | 5(3)   | -10(3) |
| C(10) | 18(4) | 22(4)  | 33(4) | -1(3) | 1(3)   | -4(3)  |
| C(11) | 17(4) | 34(4)  | 33(4) | -6(3) | -3(3)  | -6(3)  |
| C(12) | 20(5) | 34(5)  | 49(5) | -2(4) | 13(4)  | -7(4)  |
| C(13) | 62(6) | 28(4)  | 32(4) | 1(3)  | -3(4)  | -12(4) |
| C(14) | 43(5) | 31(4)  | 36(4) | -1(3) | -11(3) | -5(3)  |
| C(15) | 31(4) | 32(4)  | 40(4) | -2(3) | -11(3) | -9(3)  |
| C(16) | 19(4) | 38(5)  | 35(4) | -6(3) | 1(3)   | -9(3)  |
| C(17) | 23(4) | 31(4)  | 35(4) | 7(3)  | -7(3)  | -6(3)  |
| C(18) | 39(5) | 31(4)  | 50(5) | 4(3)  | 1(4)   | -12(3) |

**Table S17.** Hydrogen coordinates ( $\times 10^4$ ) and isotropic displacement parameters ( $\text{\AA}^2 \times 10^3$ ) for z.

|        | x    | y    | z    | U(eq) |
|--------|------|------|------|-------|
| H(19A) | 1387 | 7751 | 5807 | 37    |
| H(20A) | 4261 | 6936 | 4683 | 35    |
| H(22A) | 7992 | 6648 | 6648 | 35    |
| H(23A) | 5154 | 7476 | 7766 | 29    |

|        |       |       |      |    |
|--------|-------|-------|------|----|
| H(26A) | -649  | 9722  | 6705 | 33 |
| H(26B) | -2046 | 9255  | 7660 | 33 |
| H(29A) | 4196  | 10535 | 8286 | 33 |
| H(30A) | 6186  | 12313 | 7661 | 43 |
| H(31A) | 5169  | 14007 | 6476 | 49 |
| H(32A) | 2080  | 13851 | 5882 | 54 |
| H(33A) | 126   | 12066 | 6520 | 39 |
| H(34A) | -1115 | 9638  | 9184 | 42 |
| H(34B) | 886   | 10248 | 9312 | 42 |
| H(36A) | 3044  | 3999  | 9231 | 70 |
| H(36B) | 933   | 4135  | 8853 | 70 |
| H(36C) | 1064  | 5094  | 9727 | 70 |
| H(1A)  | -1130 | 9416  | 1743 | 38 |
| H(2A)  | -3194 | 10377 | 3089 | 40 |
| H(4A)  | 1753  | 9849  | 4436 | 33 |
| H(5A)  | 3814  | 8904  | 3081 | 38 |
| H(8A)  | 861   | 7280  | 914  | 35 |
| H(8B)  | 2532  | 7713  | 50   | 35 |
| H(11A) | 954   | 5100  | 1717 | 33 |
| H(12A) | 643   | 3270  | 2929 | 43 |
| H(13A) | 2979  | 2716  | 3942 | 49 |
| H(14A) | 5661  | 4049  | 3830 | 44 |
| H(15A) | 6041  | 5888  | 2645 | 40 |
| H(16A) | 6302  | 5290  | 492  | 36 |
| H(16B) | 5971  | 6992  | 56   | 36 |
| H(18A) | 5952  | 12503 | 1528 | 60 |
| H(18B) | 4819  | 12542 | 648  | 60 |
| H(18C) | 6952  | 11414 | 681  | 60 |

**Table S18.** Torsion angles [deg] for z.

|                         |           |
|-------------------------|-----------|
| C(24)-C(19)-C(20)-C(21) | 1.3(10)   |
| C(19)-C(20)-C(21)-C(22) | 0.2(11)   |
| C(19)-C(20)-C(21)-Br(2) | 178.6(5)  |
| C(20)-C(21)-C(22)-C(23) | -0.5(11)  |
| Br(2)-C(21)-C(22)-C(23) | -178.9(5) |
| C(21)-C(22)-C(23)-C(24) | -0.8(10)  |
| C(22)-C(23)-C(24)-C(19) | 2.4(11)   |
| C(22)-C(23)-C(24)-C(25) | 178.8(6)  |
| C(20)-C(19)-C(24)-C(23) | -2.6(10)  |
| C(20)-C(19)-C(24)-C(25) | -179.2(6) |
| C(23)-C(24)-C(25)-C(26) | 148.1(7)  |
| C(19)-C(24)-C(25)-C(26) | -35.4(9)  |
| C(23)-C(24)-C(25)-C(35) | -67.6(9)  |
| C(19)-C(24)-C(25)-C(35) | 108.9(8)  |

|                         |           |
|-------------------------|-----------|
| C(23)-C(24)-C(25)-C(27) | 80.3(9)   |
| C(19)-C(24)-C(25)-C(27) | -103.2(8) |
| C(35)-C(25)-C(26)-C(27) | 109.3(6)  |
| C(24)-C(25)-C(26)-C(27) | -105.7(7) |
| C(25)-C(26)-C(27)-C(38) | 109.5(7)  |
| C(25)-C(26)-C(27)-C(34) | -108.3(7) |
| C(35)-C(25)-C(27)-C(26) | -102.3(7) |
| C(24)-C(25)-C(27)-C(26) | 110.5(7)  |
| C(26)-C(25)-C(27)-C(38) | -108.1(7) |
| C(35)-C(25)-C(27)-C(38) | 149.6(7)  |
| C(24)-C(25)-C(27)-C(38) | 2.3(10)   |
| C(26)-C(25)-C(27)-C(34) | 106.1(7)  |
| C(35)-C(25)-C(27)-C(34) | 3.8(10)   |
| C(24)-C(25)-C(27)-C(34) | -143.4(7) |
| C(38)-C(29)-C(30)-C(31) | 0.0(12)   |
| C(29)-C(30)-C(31)-C(32) | -0.8(13)  |
| C(30)-C(31)-C(32)-C(33) | 0.9(14)   |
| C(31)-C(32)-C(33)-C(38) | 0.0(14)   |
| C(26)-C(27)-C(34)-F(2)  | -87.5(8)  |
| C(38)-C(27)-C(34)-F(2)  | 57.0(9)   |
| C(25)-C(27)-C(34)-F(2)  | -154.8(6) |
| C(36)-O(4)-C(35)-O(3)   | 5.2(11)   |
| C(36)-O(4)-C(35)-C(25)  | -173.8(6) |
| C(26)-C(25)-C(35)-O(3)  | -3.0(10)  |
| C(24)-C(25)-C(35)-O(3)  | -149.6(8) |
| C(27)-C(25)-C(35)-O(3)  | 62.6(10)  |
| C(26)-C(25)-C(35)-O(4)  | 176.0(6)  |
| C(24)-C(25)-C(35)-O(4)  | 29.4(9)   |
| C(27)-C(25)-C(35)-O(4)  | -118.4(7) |
| C(30)-C(29)-C(38)-C(33) | 0.9(11)   |
| C(30)-C(29)-C(38)-C(27) | -177.6(7) |
| C(32)-C(33)-C(38)-C(29) | -0.9(12)  |
| C(32)-C(33)-C(38)-C(27) | 177.6(8)  |
| C(26)-C(27)-C(38)-C(29) | -152.3(7) |
| C(34)-C(27)-C(38)-C(29) | 64.0(10)  |
| C(25)-C(27)-C(38)-C(29) | -83.5(9)  |
| C(26)-C(27)-C(38)-C(33) | 29.3(10)  |
| C(34)-C(27)-C(38)-C(33) | -114.4(8) |
| C(25)-C(27)-C(38)-C(33) | 98.1(9)   |
| C(6)-C(1)-C(2)-C(3)     | -1.0(11)  |
| C(1)-C(2)-C(3)-C(4)     | 0.2(11)   |
| C(1)-C(2)-C(3)-Br(1)    | -179.1(5) |
| C(2)-C(3)-C(4)-C(5)     | 0.1(11)   |
| Br(1)-C(3)-C(4)-C(5)    | 179.3(5)  |
| C(3)-C(4)-C(5)-C(6)     | 0.5(11)   |
| C(4)-C(5)-C(6)-C(1)     | -1.3(10)  |
| C(4)-C(5)-C(6)-C(7)     | 176.6(6)  |
| C(2)-C(1)-C(6)-C(5)     | 1.5(10)   |

|                         |           |
|-------------------------|-----------|
| C(2)-C(1)-C(6)-C(7)     | -176.4(6) |
| C(5)-C(6)-C(7)-C(17)    | -73.8(8)  |
| C(1)-C(6)-C(7)-C(17)    | 104.0(7)  |
| C(5)-C(6)-C(7)-C(8)     | 143.6(7)  |
| C(1)-C(6)-C(7)-C(8)     | -38.6(9)  |
| C(5)-C(6)-C(7)-C(9)     | 76.0(8)   |
| C(1)-C(6)-C(7)-C(9)     | -106.2(8) |
| C(17)-C(7)-C(8)-C(9)    | 108.7(6)  |
| C(6)-C(7)-C(8)-C(9)     | -108.3(6) |
| C(7)-C(8)-C(9)-C(16)    | -107.6(6) |
| C(7)-C(8)-C(9)-C(10)    | 106.2(7)  |
| C(17)-C(7)-C(9)-C(8)    | -103.5(7) |
| C(6)-C(7)-C(9)-C(8)     | 107.3(7)  |
| C(17)-C(7)-C(9)-C(16)   | 0.6(10)   |
| C(8)-C(7)-C(9)-C(16)    | 104.1(7)  |
| C(6)-C(7)-C(9)-C(16)    | -148.6(7) |
| C(17)-C(7)-C(9)-C(10)   | 143.9(7)  |
| C(8)-C(7)-C(9)-C(10)    | -112.5(7) |
| C(6)-C(7)-C(9)-C(10)    | -5.3(10)  |
| C(8)-C(9)-C(10)-C(15)   | -160.6(7) |
| C(16)-C(9)-C(10)-C(15)  | 53.2(10)  |
| C(7)-C(9)-C(10)-C(15)   | -90.9(9)  |
| C(8)-C(9)-C(10)-C(11)   | 23.9(10)  |
| C(16)-C(9)-C(10)-C(11)  | -122.3(8) |
| C(7)-C(9)-C(10)-C(11)   | 93.6(8)   |
| C(15)-C(10)-C(11)-C(12) | -0.4(11)  |
| C(9)-C(10)-C(11)-C(12)  | 175.2(7)  |
| C(10)-C(11)-C(12)-C(13) | -0.6(12)  |
| C(11)-C(12)-C(13)-C(14) | 1.4(13)   |
| C(12)-C(13)-C(14)-C(15) | -1.2(13)  |
| C(11)-C(10)-C(15)-C(14) | 0.6(12)   |
| C(9)-C(10)-C(15)-C(14)  | -174.9(7) |
| C(13)-C(14)-C(15)-C(10) | 0.2(13)   |
| C(8)-C(9)-C(16)-F(1)    | 139.0(7)  |
| C(10)-C(9)-C(16)-F(1)   | -72.2(8)  |
| C(7)-C(9)-C(16)-F(1)    | 72.5(9)   |
| C(18)-O(2)-C(17)-O(1)   | 5.8(11)   |
| C(18)-O(2)-C(17)-C(7)   | -176.8(6) |
| C(8)-C(7)-C(17)-O(1)    | -7.7(11)  |
| C(6)-C(7)-C(17)-O(1)    | -151.7(7) |
| C(9)-C(7)-C(17)-O(1)    | 58.2(10)  |
| C(8)-C(7)-C(17)-O(2)    | 174.9(6)  |
| C(6)-C(7)-C(17)-O(2)    | 31.0(9)   |
| C(9)-C(7)-C(17)-O(2)    | -119.1(7) |

---

Symmetry transformations used to generate equivalent atoms:

**Table S19.** Hydrogen bonds for z [ $\text{\AA}$  and deg.].

---

| D-H...A | d(D-H) | d(H...A) | d(D...A) | $\angle(\text{DHA})$ |
|---------|--------|----------|----------|----------------------|
|---------|--------|----------|----------|----------------------|
